# Supplementary material for: Conservation and divergence of myelin proteome and oligodendrocyte transcriptome profiles between humans and mice
Source: eLife. 2022 May 11;11:e77019. doi: 10.7554/eLife.77019 (PMC9094742; doi:10.7554/eLife.77019)
Supplement: Figure 1—source data 1. — Identification and quantification data of detected myelin-associated and homogenate proteins. Tryptic peptides derived from two technical replicates (replicate digestion) per five biological replicates were analyzed by liquid chromatography–mass spectrometry (LC-MS) (10 runs per condition in total). Proteins (false discovery rate [FDR] < 1%; two peptides/protein) and peptides (FDR < 1%; ≥6 amino acids) were identified by database search against the UniProtKB/SwissProt mouse database using ProteinLynx Global Server (PLGS). Data were postprocessed with the software package ISOQuant to calculate absolute in-sample amounts for each detected protein based on the TOP3 approach. Reported abundance values are defined as the relative amount of each protein with respect to the sum over all detected proteins (ppm, parts per million [w/w] of total protein). Typical contaminant proteins like albumin, hemoglobins, keratins, and trypsin were filtered. Tables are sorted by description (column D) in alphabetical order. [file elife-77019-fig1-data1.xlsx]

## Sheet: Table legend
Fig1 - source data 1. Label-free quantification of proteins in human CNS myelin and white matter homogenate by two different data acquisition modes
Identification and quantification data of detected myelin-associated and homogenate proteins. Tryptic peptides derived from two technical replicates (replicate digestion) per five biological replicates were analyzed by LC-MS (10 runs per condition in total). Proteins (FDR < 1%; 2 peptides/protein) and peptides (FDR < 1%; ≥6 amino acids) were identified by database search against the UniprotKB/Swi…
Sheet 1	1_Myelin MSe (332 proteins)	LC-MS analysis of human CNS myelin by MSe (i.e. with highest dynamic range)
Sheet 2	2_Myelin UDMSe (835 proteins)	LC-MS analysis of human CNS myelin by UDMSe (i.e. with highest proteome depth)
Sheet 3	3_Lysate Myelin MSe (545 proteins)	LC-MS analysis of human white matter homogenate and CNS myelin by MSe (i.e. with highest dynamic range)
Sheet 4	4_Lysate Myelin UDMSe (1268 proteins)	LC-MS analysis of human white matter homogenate and CNS myelin by UDMSe (i.e. with highest proteome depth)
Column descriptions sheets 1-2
A	gene name	Gene name as extracted from description (column D)
B	accession	Database accession number as parsed from source database
C	entry	Protein entry as parsed from source database
D	description	Protein description as parsed from UniprotKB/SwissProt mouse source database
E	IEP	Calculated isoelectric point
F	mw	Calculated molecular weight (Da)
G	max score	Maximum identification score provided by PLGS database searching
H	reported peptides	Number of peptides after ISOQuant processing
I	sequence coverage	Sequence coverage of the protein
J-S	Control_M 1 to Control_M 10	Relative myelin protein abundance in ppm for each replicate (adjusted to yield 1 mio after removal of contaminants)
T	AVERAGE Control_M	Relative myelin protein abundance in ppm given as overall average
Column descriptions sheets 3-4
A	gene name	Gene name as extracted from description (column D)
B	accession	Database accession number as parsed from source database
C	entry	Protein entry as parsed from source database
D	description	Protein description as parsed from UniprotKB/SwissProt mouse source database
E	IEP	Calculated isoelectric point
F	mw	Calculated molecular weight (Da)
G	max score	Maximum identification score provided by PLGS database searching
H	reported peptides	Number of peptides after ISOQuant processing
I	sequence coverage	Sequence coverage of the protein
J-S	Control_L 1 to Control_L 10	Relative homogenate protein abundance in ppm for each replicate
T-AC	Control_M 1 to Control_M 10	Relative myelin protein abundance in ppm for each replicate
AD	AVERAGE Control_L	Relative homogenate protein abundance in ppm given as overall average
AE	AVERAGE Control_M	Relative myelin protein abundance in ppm given as overall average

## Sheet: 1_Myelin MSe (332)
gene name	accession	entry	description	IEP	mw	max score	reported peptides	sequence coverage	Control_M 1	Control_M 2	Control_M 3	Control_M 4	Control_M 5	Control_M 6	Control_M 7	Control_M 8	Control_M 9	Control_M 10	AVERAGE Control_M
YWHAB	P31946	1433B_HUMAN	14-3-3 protein beta/alpha OS=Homo sapiens OX=9606 GN=YWHAB PE=1 SV=3	4.57	28196.5	2303.07	9	47.97	114.018	99.5009	80.1737	66.6413	47.5099	44.7993	75.0346	72.6964	59.8623	52.4741	71.2711
YWHAE	P62258	1433E_HUMAN	14-3-3 protein epsilon OS=Homo sapiens OX=9606 GN=YWHAE PE=1 SV=1	4.44	29345	2767.86	14	63.14	207.494	197.307	170.953	161.517	110.516	99.112	152.178	154.055	139.69	123.31	151.613
YWHAH	Q04917	1433F_HUMAN	14-3-3 protein eta OS=Homo sapiens OX=9606 GN=YWHAH PE=1 SV=4	4.56	28389.9	1587.04	5	26.83	74.5857	48.1962	36.965	44.1884	33.2468	28.6251	52.2555	55.7318	46.3087	42.1475	46.2251
YWHAG	P61981	1433G_HUMAN	14-3-3 protein gamma OS=Homo sapiens OX=9606 GN=YWHAG PE=1 SV=2	4.61	28473.7	5217.19	12	54.25	254.394	240.497	95.5133	91.6159	57.3568	53.101	112.39	117.142	73.5218	60.4726	115.6
SFN	P31947	1433S_HUMAN	14-3-3 protein sigma OS=Homo sapiens OX=9606 GN=SFN PE=1 SV=1	4.48	27888.2	1447.56	3	10.89	32.6342	27.2794	17.3916	20.8081	17.4695	18.8728	18.8294	25.4756	17.5875	18.9424	21.5291
YWHAQ	P27348	1433T_HUMAN	14-3-3 protein theta OS=Homo sapiens OX=9606 GN=YWHAQ PE=1 SV=1	4.48	28049.4	2323.82	10	48.57	75.0822	70.0606	79.6518	83.2312	51.8913	46.6659	72.5106	77.3956	69.3393	64.8994	69.0728
YWHAZ	P63104	1433Z_HUMAN	14-3-3 protein zeta/delta OS=Homo sapiens OX=9606 GN=YWHAZ PE=1 SV=1	4.53	27916.2	7057.1	13	63.27	188.949	183.442	121.501	117.634	76.2022	73.0886	127.369	124.394	107.187	93.5591	121.333
CNP	P09543	CN37_HUMAN	2'_3'-cyclic-nucleotide 3'-phosphodiesterase OS=Homo sapiens OX=9606 GN=CNP PE=1 SV=2	9.49	47977.9	89725	32	78.86	36487.1	35327.6	53115.7	56852.7	48973	47760.8	45994.7	51001.3	30010.5	41242	44676.5
HSPD1	P10809	CH60_HUMAN	60 kDa heat shock protein_ mitochondrial OS=Homo sapiens OX=9606 GN=HSPD1 PE=1 SV=2	5.56	61225.9	734.057	13	37.52	192.009	175.282	256.215	238.613	133.186	137.369	234.065	227.613	153.533	136.177	188.406
ASAH1	Q13510	ASAH1_HUMAN	Acid ceramidase OS=Homo sapiens OX=9606 GN=ASAH1 PE=1 SV=5	7.53	45115.9	1361.01	7	27.34	176.995	177.649	188.482	209.767	136.108	138.47	67.6261	72.3926	104.807	114.157	138.645
ACO2	Q99798	ACON_HUMAN	Aconitate hydratase_ mitochondrial OS=Homo sapiens OX=9606 GN=ACO2 PE=1 SV=2	7.35	86166.9	1783.62	23	48.33	488.894	509.377	488.03	534.468	375.311	386.026	523.645	586.628	438.49	386.018	471.689
SLC25A4	P12235	ADT1_HUMAN	ADP/ATP translocase 1 OS=Homo sapiens OX=9606 GN=SLC25A4 PE=1 SV=4	10.25	33292.7	2800.83	15	51.34	256.455	276.625	200.35	293.527	315.068	336.699	265.3	289.218	326.311	413.206	297.276
SLC25A5	P05141	ADT2_HUMAN	ADP/ATP translocase 2 OS=Homo sapiens OX=9606 GN=SLC25A5 PE=1 SV=7	10.16	33080.4	1581.9	13	41.28	145.485	131.496	128.784	129.877	133.881	118.472	140.167	135.076	147.478	125.006	133.572
SLC25A6	P12236	ADT3_HUMAN	ADP/ATP translocase 3 OS=Homo sapiens OX=9606 GN=SLC25A6 PE=1 SV=4	10.24	33094.4	2649.98	15	53.69	137.311	122.51	116.522	127.308	159.082	121.144	132.831	126.31	170.231	130.481	134.373
SLC25A31	Q9H0C2	ADT4_HUMAN	ADP/ATP translocase 4 OS=Homo sapiens OX=9606 GN=SLC25A31 PE=2 SV=1	10.45	35307.1	647.625	4	14.92	32.2652	28.9282	32.8106	31.7896	27.0084	22.7898	29.7691	29.7871	22.3791	19.8952	27.7422
ARF3	P61204	ARF3_HUMAN	ADP-ribosylation factor 3 OS=Homo sapiens OX=9606 GN=ARF3 PE=1 SV=2	7.4	20657.8	2129.46	9	61.88	79.5013	69.2606	65.3858	76.5943	57.1368	53.0756	71.1341	72.8107	54.5323	73.2615	67.2693
ARF4	P18085	ARF4_HUMAN	ADP-ribosylation factor 4 OS=Homo sapiens OX=9606 GN=ARF4 PE=1 SV=3	7.05	20624.9	1862.89	9	56.67	52.3418	46.2488	53.8478	56.9948	51.9869	46.8294	52.11	50.8782	46.8446	54.8838	51.2966
ARF5	P84085	ARF5_HUMAN	ADP-ribosylation factor 5 OS=Homo sapiens OX=9606 GN=ARF5 PE=1 SV=2	6.39	20643.8	1746.93	6	39.44	13.0803	12.0127	11.7863	13.6848	11.5806	10.3453	13.9072	16.2507	7.70756	11.6093	12.1965
ARL8B	Q9NVJ2	ARL8B_HUMAN	ADP-ribosylation factor-like protein 8B OS=Homo sapiens OX=9606 GN=ARL8B PE=1 SV=1	8.6	21767.2	953.625	5	27.96	47.0291	47.5605	66.3157	64.735	51.7967	47.3398	53.3156	59.1605	28.4627	35.3025	50.1018
ALDH7A1	P49419	AL7A1_HUMAN	Alpha-aminoadipic semialdehyde dehydrogenase OS=Homo sapiens OX=9606 GN=ALDH7A1 PE=1 SV=5	7.94	59057.5	4721.35	24	62.89	329.492	290.529	461.786	520.85	631.964	641.297	645.963	795.55	468.072	433.249	521.875
ACTR1A	P61163	ACTZ_HUMAN	Alpha-centractin OS=Homo sapiens OX=9606 GN=ACTR1A PE=1 SV=1	6.22	42727.9	1086.92	6	27.66	223.495	227.498	156.415	168.847	106.524	103.171	144.593	172.97	122.824	120.369	154.671
CRYAB	P02511	CRYAB_HUMAN	Alpha-crystallin B chain OS=Homo sapiens OX=9606 GN=CRYAB PE=1 SV=2	6.96	20158.9	23025.3	10	68	2095.44	2014.87	2141.69	2866.52	1786.64	1618.15	2425.55	2911.18	1326.67	1358.5	2054.52
ENO1	P06733	ENOA_HUMAN	Alpha-enolase OS=Homo sapiens OX=9606 GN=ENO1 PE=1 SV=2	7.19	47511.2	23579.8	26	78.57	1482.34	1344.26	1435.69	1256	2642.41	2290.36	2190.72	2066.08	1645.08	1458.9	1781.18
INA	Q16352	AINX_HUMAN	Alpha-internexin OS=Homo sapiens OX=9606 GN=INA PE=1 SV=2	5.17	55561.8	12576	31	73.35	1943.15	1800.83	1784.37	1554.45	847.082	867.503	2037.31	2009.19	735.702	642.762	1422.24
NAPA	P54920	SNAA_HUMAN	Alpha-soluble NSF attachment protein OS=Homo sapiens OX=9606 GN=NAPA PE=1 SV=3	5.07	33689	676.33	4	25.76	52.483	55.2937	64.297	55.7928	54.8168	50.0805	54.8092	48.2512	60.2801	41.0717	53.7176
MAOB	P27338	AOFB_HUMAN	Amine oxidase [flavin-containing] B OS=Homo sapiens OX=9606 GN=MAOB PE=1 SV=3	7.27	59276.3	950.216	13	39.23	141.714	134.256	241.324	243.708	106.374	108.593	184.899	189.98	72.2187	64.6146	148.768
ANLN	Q9NQW6	ANLN_HUMAN	Anillin OS=Homo sapiens OX=9606 GN=ANLN PE=1 SV=2	8.01	125568	999.416	17	20.73	581.972	633.919	653.138	770.828	805.32	800.754	519.726	538.462	765.325	758.972	682.841
ANXA5	P08758	ANXA5_HUMAN	Annexin A5 OS=Homo sapiens OX=9606 GN=ANXA5 PE=1 SV=2	4.73	35993.9	612.344	4	21.25	42.4357	46.5172	62.5401	59.4341	39.9403	38.4027	49.6666	50.6224	59.0622	54.081	50.2702
ANXA6	P08133	ANXA6_HUMAN	Annexin A6 OS=Homo sapiens OX=9606 GN=ANXA6 PE=1 SV=3	5.27	76215.6	3635.33	31	65.08	756.549	727.14	136.614	134.555	418.778	402.226	406.6	434.753	560.701	495.93	447.385
AP2B1	P63010	AP2B1_HUMAN	AP-2 complex subunit beta OS=Homo sapiens OX=9606 GN=AP2B1 PE=1 SV=1	5.06	105465	390.848	3	5.98	155.597	176.764	210.259	244.075	161.948	136.197	189.72	192.96	136.146	197.372	180.104
GOT2	P00505	AATM_HUMAN	Aspartate aminotransferase_ mitochondrial OS=Homo sapiens OX=9606 GN=GOT2 PE=1 SV=3	9.36	47916.9	2940.75	14	48.84	281.718	261.229	283.572	289.933	272.223	262.418	312.744	327.732	345.862	312.941	295.037
ATL1	Q8WXF7	ATLA1_HUMAN	Atlastin-1 OS=Homo sapiens OX=9606 GN=ATL1 PE=1 SV=1	5.78	63885.8	765.216	3	14.7	79.6203	69.3566	82.5041	105.901	65.418	69.3876	97.1064	106.075	76.4011	59.7546	81.1524
ATP5PB	P24539	AT5F1_HUMAN	ATP synthase F(0) complex subunit B1_ mitochondrial OS=Homo sapiens OX=9606 GN=ATP5PB PE=1 SV=2	9.78	28965.7	1533.21	3	18.36	64.2405	61.4648	65.8355	68.8318	46.3729	48.5577	62.4502	71.8291	49.0785	33.9309	57.2592
ATP5F1A	P25705	ATPA_HUMAN	ATP synthase subunit alpha_ mitochondrial OS=Homo sapiens OX=9606 GN=ATP5F1A PE=1 SV=1	9.55	59864.8	6834.15	21	53.35	731.967	734.778	960.911	904.121	550.052	581.635	890.485	951.994	484.898	448.919	723.976
ATP5F1B	P06576	ATPB_HUMAN	ATP synthase subunit beta_ mitochondrial OS=Homo sapiens OX=9606 GN=ATP5F1B PE=1 SV=3	5.1	56560	7121.84	22	63.89	748.803	692.017	887.838	890.62	477.806	502.985	778.421	816.354	358.14	399.164	655.215
ATP5PD	O75947	ATP5H_HUMAN	ATP synthase subunit d_ mitochondrial OS=Homo sapiens OX=9606 GN=ATP5PD PE=1 SV=3	5.02	18548.3	1298.5	3	33.54	79.1992	76.7576	49.9148	88.7387	46.8796	47.2335	93.563	95.1559	81.8141	38.4487	69.7705
ATP5MF	P56134	ATPK_HUMAN	ATP synthase subunit f_ mitochondrial OS=Homo sapiens OX=9606 GN=ATP5MF PE=1 SV=3	10.07	11031.9	2245.24	2	25.53	32.9325	31.3041	32.0242	36.4102	16.7017	17.2225	36.968	38.3981	0	18.1888	26.015
ATP5F1C	P36542	ATPG_HUMAN	ATP synthase subunit gamma_ mitochondrial OS=Homo sapiens OX=9606 GN=ATP5F1C PE=1 SV=1	9.7	33053.1	748.872	3	12.08	62.8599	61.3086	91.8479	75.9073	62.0371	52.549	78.7788	73.9494	47.6906	38.8841	64.5813
ATP5PO	P48047	ATPO_HUMAN	ATP synthase subunit O_ mitochondrial OS=Homo sapiens OX=9606 GN=ATP5PO PE=1 SV=1	10.6	23391.4	3325.79	8	51.17	90.4492	92.2242	114.057	101.259	76.5823	69.2879	107.666	102.872	65.4849	55.0566	87.4938
PFKP	Q01813	PFKAP_HUMAN	ATP-dependent 6-phosphofructokinase_ platelet type OS=Homo sapiens OX=9606 GN=PFKP PE=1 SV=2	7.37	86508.7	990.815	21	46.17	454.011	419.415	201.191	220.698	263.742	251.023	392.438	386.706	224.975	239.124	305.332
EPB41L2	O43491	E41L2_HUMAN	Band 4.1-like protein 2 OS=Homo sapiens OX=9606 GN=EPB41L2 PE=1 SV=1	5.18	113101	1292.92	27	43.18	883.168	839.714	880.757	866.658	994.422	894.822	709.907	752.532	795.834	776.869	839.468
EPB41L3	Q9Y2J2	E41L3_HUMAN	Band 4.1-like protein 3 OS=Homo sapiens OX=9606 GN=EPB41L3 PE=1 SV=2	4.92	121533	1208.47	23	41.03	1092.88	956.975	773.055	803.396	569.195	521.3	971.09	1022.91	453.612	459.243	762.365
ENO3	P13929	ENOB_HUMAN	Beta-enolase OS=Homo sapiens OX=9606 GN=ENO3 PE=1 SV=5	7.67	47329.1	6277.16	6	23.96	77.2276	77.5942	114.705	64.211	175.029	144.326	89.8994	92.0508	114.911	78.8873	102.884
NAPB	Q9H115	SNAB_HUMAN	Beta-soluble NSF attachment protein OS=Homo sapiens OX=9606 GN=NAPB PE=1 SV=2	5.18	33899.2	653.517	6	37.58	56.0029	55.5603	42.9664	40.4472	31.7683	33.8274	50.1773	54.5028	45.3323	43.5253	45.411
BASP1	P80723	BASP1_HUMAN	Brain acid soluble protein 1 OS=Homo sapiens OX=9606 GN=BASP1 PE=1 SV=2	4.42	22693.4	1392.96	6	69.16	45.5313	31.7536	58.6464	54.8593	63.6449	59.7228	63.9459	42.0205	74.5649	65.2219	55.9911
BCAS1	O75363	BCAS1_HUMAN	Breast carcinoma-amplified sequence 1 OS=Homo sapiens OX=9606 GN=BCAS1 PE=1 SV=2	4.8	61994.1	922.914	7	23.12	144.308	126.739	277.865	270.942	201.607	171.684	227.138	200.676	233.618	194.089	204.866
CAMK2A	Q9UQM7	KCC2A_HUMAN	Calcium/calmodulin-dependent protein kinase type II subunit alpha OS=Homo sapiens OX=9606 GN=CAMK2A PE=1 SV=2	6.66	54658.1	5656.14	17	51.05	555.251	562.159	944.862	938.753	577.175	560.587	632.152	665.776	402.925	387.354	622.699
CAMK2B	Q13554	KCC2B_HUMAN	Calcium/calmodulin-dependent protein kinase type II subunit beta OS=Homo sapiens OX=9606 GN=CAMK2B PE=1 SV=3	6.91	73590.3	2181.87	14	45.35	244.221	235.149	233.047	310.348	180.969	183.905	277.416	275.224	176.947	144.215	226.144
CAMK2D	Q13557	KCC2D_HUMAN	Calcium/calmodulin-dependent protein kinase type II subunit delta OS=Homo sapiens OX=9606 GN=CAMK2D PE=1 SV=3	6.88	56996.8	1893.06	10	26.65	83.6276	88.2043	142.327	141.673	97.6082	97.4149	107.724	115.632	78.8091	77.2403	103.026
CAMK2G	Q13555	KCC2G_HUMAN	Calcium/calmodulin-dependent protein kinase type II subunit gamma OS=Homo sapiens OX=9606 GN=CAMK2G PE=1 SV=4	7.68	63348.6	1968.54	15	40.5	201.935	191.301	166.095	211.097	130.483	126.437	208.402	208.18	111.619	104.178	165.973
CALR	P27797	CALR_HUMAN	Calreticulin OS=Homo sapiens OX=9606 GN=CALR PE=1 SV=1	4.09	48312.7	616.984	2	12.71	45.0179	46.2005	60.8897	52.4863	24.4867	18.4186	63.0308	58.0344	34.9584	25.5623	42.9086
CA2	P00918	CAH2_HUMAN	Carbonic anhydrase 2 OS=Homo sapiens OX=9606 GN=CA2 PE=1 SV=2	7.06	29303.1	10230	14	73.08	307.806	288.648	589.094	561.714	510.968	508.155	384.403	411.301	736.053	612.914	491.106
CBR1	P16152	CBR1_HUMAN	Carbonyl reductase [NADPH] 1 OS=Homo sapiens OX=9606 GN=CBR1 PE=1 SV=3	8.42	30660.1	9180.38	13	61.37	524.275	493.543	560.234	543.377	369.982	377.506	579.156	639.42	459.678	420.446	496.762
CBR3	O75828	CBR3_HUMAN	Carbonyl reductase [NADPH] 3 OS=Homo sapiens OX=9606 GN=CBR3 PE=1 SV=3	5.78	31249.5	2310.63	3	28.88	23.6668	24.0576	24.9614	26.4242	19.1637	18.3231	32.0674	33.449	34.647	31.2368	26.7997
CTSD	P07339	CATD_HUMAN	Cathepsin D OS=Homo sapiens OX=9606 GN=CTSD PE=1 SV=1	6.12	45065.5	1058.51	5	19.9	112.299	112.394	92.5782	108.131	62.2493	59.7478	82.8306	82.7466	63.6187	68.9418	84.5537
CD59	P13987	CD59_HUMAN	CD59 glycoprotein OS=Homo sapiens OX=9606 GN=CD59 PE=1 SV=1	6.07	14804.6	1957.05	4	40.63	32.8321	30.2124	37.3437	37.7284	44.4266	41.7454	44.0672	43.7963	48.9407	41.9887	40.3082
CD81	P60033	CD81_HUMAN	CD81 antigen OS=Homo sapiens OX=9606 GN=CD81 PE=1 SV=1	4.92	26493.8	12512.4	5	30.93	681.673	662.069	1186.87	1229.87	1387.63	1286.38	939.894	997.248	1162.03	1386.34	1092
CD9	P21926	CD9_HUMAN	CD9 antigen OS=Homo sapiens OX=9606 GN=CD9 PE=1 SV=4	6.92	25986.4	28949.3	9	31.14	2769.37	2629.13	2567.48	6191.1	3508.2	2918.02	2899.57	3710.69	2124.22	2779.79	3209.76
CADM2	Q8N3J6	CADM2_HUMAN	Cell adhesion molecule 2 OS=Homo sapiens OX=9606 GN=CADM2 PE=2 SV=1	5	48010.2	2166.38	8	34.02	205.734	194.582	250.331	299.246	352.709	313.807	256.306	275.843	236.577	226.937	261.207
CADM3	Q8N126	CADM3_HUMAN	Cell adhesion molecule 3 OS=Homo sapiens OX=9606 GN=CADM3 PE=1 SV=1	5.68	43756.2	1561.24	9	39.2	172.681	148.431	222.231	210.177	200.472	189.975	157.379	158.842	178.257	164.867	180.331
CADM4	Q8NFZ8	CADM4_HUMAN	Cell adhesion molecule 4 OS=Homo sapiens OX=9606 GN=CADM4 PE=1 SV=1	5.9	43241.6	2100.07	12	46.13	167.961	166.639	188.681	205.398	204.549	187.493	177.261	166.576	267.44	242.283	197.428
CEND1	Q8N111	CEND_HUMAN	Cell cycle exit and neuronal differentiation protein 1 OS=Homo sapiens OX=9606 GN=CEND1 PE=1 SV=1	9.98	15011	939.247	3	27.52	63.4229	62.3022	61.4971	68.4903	44.0056	48.1024	68.4519	77.9927	40.2774	38.5571	57.31
CDC42	P60953	CDC42_HUMAN	Cell division control protein 42 homolog OS=Homo sapiens OX=9606 GN=CDC42 PE=1 SV=2	6.18	21600.8	7520.25	9	48.17	122.875	112.949	214.305	239.67	226.842	161.485	166.86	200.029	263.936	176.233	188.518
SLC44A1	Q8WWI5	CTL1_HUMAN	Choline transporter-like protein 1 OS=Homo sapiens OX=9606 GN=SLC44A1 PE=1 SV=1	8.56	74842	2963.86	15	29.38	757.003	690.958	961.413	978.613	1263.54	1107.11	790.283	839.953	1313.96	1171.36	987.419
CLTC	Q00610	CLH1_HUMAN	Clathrin heavy chain 1 OS=Homo sapiens OX=9606 GN=CLTC PE=1 SV=5	5.36	193383	1198.2	46	44.9	1356.44	1365.47	1401.14	1190.51	796.184	802.808	1040.38	1185.47	795.227	681.312	1061.49
CLDN11	O75508	CLD11_HUMAN	Claudin-11 OS=Homo sapiens OX=9606 GN=CLDN11 PE=1 SV=2	7.8	22734.6	13745.5	3	14.98	2298.64	1965.21	5324.42	5843.44	3514.27	3460.57	2967.11	2854.91	4670.08	4749.01	3764.77
CFL1	P23528	COF1_HUMAN	Cofilin-1 OS=Homo sapiens OX=9606 GN=CFL1 PE=1 SV=3	8.23	18730.6	16979.4	11	65.06	236.835	221.403	221.991	241.731	217.96	176.56	199.24	248.529	330.773	343.044	243.807
CFL2	Q9Y281	COF2_HUMAN	Cofilin-2 OS=Homo sapiens OX=9606 GN=CFL2 PE=1 SV=1	8.16	18850.7	7465.15	10	69.88	72.0603	65.2426	81.1784	83.3982	72.2639	69.9465	66.769	68.7441	182.702	155.075	91.738
CNTN1	Q12860	CNTN1_HUMAN	Contactin-1 OS=Homo sapiens OX=9606 GN=CNTN1 PE=1 SV=1	5.53	114176	2390.24	32	50.98	680.867	655.413	895.412	907.623	1154.07	1021.2	968.656	1025.98	1121.83	1016.65	944.772
CNTNAP1	P78357	CNTP1_HUMAN	Contactin-associated protein 1 OS=Homo sapiens OX=9606 GN=CNTNAP1 PE=1 SV=1	6.63	158320	1276.46	35	36.27	531.68	532.868	702.173	738.974	972.101	886.912	744.071	761.959	813.631	808.204	749.257
CKB	P12277	KCRB_HUMAN	Creatine kinase B-type OS=Homo sapiens OX=9606 GN=CKB PE=1 SV=1	5.23	42929.5	26424.8	18	76.9	3038.53	2917.19	878.606	1181.09	353.01	345.326	2008.22	2251.18	377.291	387.288	1373.77
CKMT1A	P12532	KCRU_HUMAN	Creatine kinase U-type_ mitochondrial OS=Homo sapiens OX=9606 GN=CKMT1A PE=1 SV=1	8.37	47436	1585.22	10	43.88	190.613	204.815	180.333	241.819	129.816	130.387	183.465	212.408	126.869	145.747	174.627
CSRP1	P21291	CSRP1_HUMAN	Cysteine and glycine-rich protein 1 OS=Homo sapiens OX=9606 GN=CSRP1 PE=1 SV=3	8.56	21422.8	6723.32	8	64.25	217.307	194.375	498.35	486.311	380.318	355.063	218.875	227.663	343.483	277.703	319.945
UQCRC1	P31930	QCR1_HUMAN	Cytochrome b-c1 complex subunit 1_ mitochondrial OS=Homo sapiens OX=9606 GN=UQCRC1 PE=1 SV=3	5.95	53330.2	2472.94	13	49.58	232.585	223.835	247.225	244.23	178.865	176.344	245.42	269.751	143.359	161.625	212.324
UQCRC2	P22695	QCR2_HUMAN	Cytochrome b-c1 complex subunit 2_ mitochondrial OS=Homo sapiens OX=9606 GN=UQCRC2 PE=1 SV=3	8.93	48614.2	953.896	11	41.28	158.047	154.052	157.893	167.894	115.117	138.854	165.362	178.938	125.657	104.641	146.645
CYCS	P99999	CYC_HUMAN	Cytochrome c OS=Homo sapiens OX=9606 GN=CYCS PE=1 SV=2	10.15	11862.8	2601.08	5	44.76	31.6408	24.034	21.3923	30.976	21.3038	17.2898	30.5938	31.6353	30.2874	24.7392	26.3892
MT-CO2	P00403	COX2_HUMAN	Cytochrome c oxidase subunit 2 OS=Homo sapiens OX=9606 GN=MT-CO2 PE=1 SV=1	4.49	25736.2	1710.44	5	27.75	140.701	122.007	82.9992	126.116	76.0203	73.4741	134.059	135.306	70.4582	73.8697	103.501
COX4I1	P13073	COX41_HUMAN	Cytochrome c oxidase subunit 4 isoform 1_ mitochondrial OS=Homo sapiens OX=9606 GN=COX4I1 PE=1 SV=1	10.11	19633.8	1462.19	6	31.95	69.7122	68.4341	80.5387	70.5244	49.9069	49.0721	69.9269	72.6231	47.834	42.3529	62.0925
NDUFA4	O00483	NDUA4_HUMAN	Cytochrome c oxidase subunit NDUFA4 OS=Homo sapiens OX=9606 GN=NDUFA4 PE=1 SV=1	9.85	9426.9	2447.08	2	27.16	43.4627	40.0235	37.5	42.1356	36.0471	35.0372	41.4747	45.2448	27.3826	26.7878	37.5096
CYC1	P08574	CY1_HUMAN	Cytochrome c1_ heme protein_ mitochondrial OS=Homo sapiens OX=9606 GN=CYC1 PE=1 SV=3	9.23	35764.2	1140.55	3	27.08	71.613	105.792	104.202	108.671	85.9174	79.0315	105.09	115.258	74.6113	67.695	91.7881
DYNC1H1	Q14204	DYHC1_HUMAN	Cytoplasmic dynein 1 heavy chain 1 OS=Homo sapiens OX=9606 GN=DYNC1H1 PE=1 SV=5	5.99	535146	952.117	130	41.97	4110.44	3858.51	4044.9	3738.61	5058.44	5594.38	4919.42	5277.1	3837.91	4159.29	4459.9
DYNC1LI2	O43237	DC1L2_HUMAN	Cytoplasmic dynein 1 light intermediate chain 2 OS=Homo sapiens OX=9606 GN=DYNC1LI2 PE=1 SV=1	5.97	54384.5	1059.3	6	25	757.316	770.171	735.699	715.935	1001.79	868.06	767.505	707.951	967.453	831.31	812.319
CNDP2	Q96KP4	CNDP2_HUMAN	Cytosolic non-specific dipeptidase OS=Homo sapiens OX=9606 GN=CNDP2 PE=1 SV=2	5.59	53220.7	861.761	9	26.32	155.413	115.937	138.787	119.738	143.459	115.847	125.454	140.747	194.141	120.972	137.05
PHGDH	O43175	SERA_HUMAN	D-3-phosphoglycerate dehydrogenase OS=Homo sapiens OX=9606 GN=PHGDH PE=1 SV=4	6.31	57392	845.661	8	21.01	179.29	166.456	131.225	125.465	115.062	101.945	88.5774	82.7316	150.723	139.435	128.091
ALDH4A1	P30038	AL4A1_HUMAN	Delta-1-pyrroline-5-carboxylate dehydrogenase_ mitochondrial OS=Homo sapiens OX=9606 GN=ALDH4A1 PE=1 SV=3	8.07	62175.8	714.881	9	27.89	75.3003	81.1981	118.591	141.648	175.996	171.196	152.564	174.722	129.357	158.69	137.926
DES	P17661	DESM_HUMAN	Desmin OS=Homo sapiens OX=9606 GN=DES PE=1 SV=3	5.03	53592.9	1178.24	4	17.02	1061.44	969.429	1222.43	1325.86	821.225	869.092	968.123	1039.86	1472.71	883.367	1063.35
DSTN	P60981	DEST_HUMAN	Destrin OS=Homo sapiens OX=9606 GN=DSTN PE=1 SV=3	7.84	18962	782.208	2	10.91	42.4072	38.0521	17.3708	33.8219	5.70713	24.028	32.4066	33.2455	51.8783	44.9089	32.3826
QDPR	P09417	DHPR_HUMAN	Dihydropteridine reductase OS=Homo sapiens OX=9606 GN=QDPR PE=1 SV=2	7.19	26017.7	12182.6	13	68.03	460.039	436.705	553.083	548.297	302.691	302.672	482.827	550.286	462.285	464.671	456.356
CRMP1	Q14194	DPYL1_HUMAN	Dihydropyrimidinase-related protein 1 OS=Homo sapiens OX=9606 GN=CRMP1 PE=1 SV=1	6.62	62526.1	4293.85	12	50.17	244.404	234.478	123.086	166.79	234.547	211.936	248.736	258.877	175.755	219.318	211.793
DPYSL2	Q16555	DPYL2_HUMAN	Dihydropyrimidinase-related protein 2 OS=Homo sapiens OX=9606 GN=DPYSL2 PE=1 SV=1	5.95	62749.9	25216.2	30	84.62	4165.67	3842.3	2814.66	2578.66	3807.61	3689.43	4313.06	4732.42	3130.79	3125.13	3619.97
DPYSL3	Q14195	DPYL3_HUMAN	Dihydropyrimidinase-related protein 3 OS=Homo sapiens OX=9606 GN=DPYSL3 PE=1 SV=1	6.06	62362.6	2324.35	12	49.82	157.503	154.177	96.5229	133.62	340.527	312.87	281.503	284.929	76.7963	113.077	195.153
DPYSL4	O14531	DPYL4_HUMAN	Dihydropyrimidinase-related protein 4 OS=Homo sapiens OX=9606 GN=DPYSL4 PE=1 SV=2	6.69	62505	631.538	10	32.34	100.568	107.42	80.9146	88.7231	134.643	113.49	108.201	115.022	115.755	115.331	108.007
DPYSL5	Q9BPU6	DPYL5_HUMAN	Dihydropyrimidinase-related protein 5 OS=Homo sapiens OX=9606 GN=DPYSL5 PE=1 SV=1	6.79	61991.7	4133.48	23	62.06	565.61	548.816	402.337	409.302	641.167	670.799	605.165	626.521	639.278	647.618	575.661
DNAJA1	P31689	DNJA1_HUMAN	DnaJ homolog subfamily A member 1 OS=Homo sapiens OX=9606 GN=DNAJA1 PE=1 SV=2	6.7	45609.6	793.988	6	26.7	52.7559	60.4233	68.6317	63.1221	68.3018	64.7905	50.5528	63.8597	65.8077	67.6226	62.5868
DNAJC5	Q9H3Z4	DNJC5_HUMAN	DnaJ homolog subfamily C member 5 OS=Homo sapiens OX=9606 GN=DNAJC5 PE=1 SV=1	4.75	22947.2	1218.35	2	24.75	20.3633	20.7351	45.9042	37.4906	42.3012	40.2407	27.2771	36.5099	45.6554	38.7928	35.527
DCTN2	Q13561	DCTN2_HUMAN	Dynactin subunit 2 OS=Homo sapiens OX=9606 GN=DCTN2 PE=1 SV=4	4.93	44345.1	1053.81	7	32.17	91.5422	93.4145	63.0875	59.2541	32.6209	39.97	49.4489	58.6537	50.4092	41.2265	57.9627
DNM1	Q05193	DYN1_HUMAN	Dynamin-1 OS=Homo sapiens OX=9606 GN=DNM1 PE=1 SV=2	6.79	97807.7	3241.94	35	52.55	882.6	895.574	655.187	777.203	572.738	552.774	758.2	876.584	629.043	529.391	712.929
DNM2	P50570	DYN2_HUMAN	Dynamin-2 OS=Homo sapiens OX=9606 GN=DNM2 PE=1 SV=2	7.15	98406.6	556.754	19	26.55	113.231	123.428	106.537	143.362	120.19	151.757	124.462	127.488	118.407	161.381	129.024
DNM3	Q9UQ16	DYN3_HUMAN	Dynamin-3 OS=Homo sapiens OX=9606 GN=DNM3 PE=1 SV=4	8.5	98145.5	1117.26	19	36.36	219.859	222.607	154.716	234.023	202.36	194.072	206.154	212.971	172.9	219.129	203.879
DYNLL1	P63167	DYL1_HUMAN	Dynein light chain 1_ cytoplasmic OS=Homo sapiens OX=9606 GN=DYNLL1 PE=1 SV=1	7.24	10537	7775	4	57.3	45.9055	45.194	46.6278	55.8434	40.9583	38.7639	50.3347	54.6845	53.4168	50.7334	48.2462
DYNLL2	Q96FJ2	DYL2_HUMAN	Dynein light chain 2_ cytoplasmic OS=Homo sapiens OX=9606 GN=DYNLL2 PE=1 SV=1	7.26	10463.9	3246.75	4	57.3	43.2415	39.8795	30.8129	43.5028	29.5061	28.7239	39.8158	43.0289	37.7111	38.0952	37.4318
EHD1	Q9H4M9	EHD1_HUMAN	EH domain-containing protein 1 OS=Homo sapiens OX=9606 GN=EHD1 PE=1 SV=2	6.39	60684	524.216	5	17.6	57.5818	58.2227	59.3989	66.0673	75.8643	74.2894	50.7159	65.3986	62.6805	88.2684	65.8488
EHD3	Q9NZN3	EHD3_HUMAN	EH domain-containing protein 3 OS=Homo sapiens OX=9606 GN=EHD3 PE=1 SV=2	6.13	60944.3	837.543	11	38.5	84.6197	87.0452	69.8514	81.0638	108.876	90.7406	80.6107	92.9265	90.4422	100.329	88.6505
EEF1A1	P68104	EF1A1_HUMAN	Elongation factor 1-alpha 1 OS=Homo sapiens OX=9606 GN=EEF1A1 PE=1 SV=1	9.49	50483.1	7099.15	17	66.67	791.588	796.114	1073.43	1197.53	1040.99	1018.59	882.664	915.064	749.384	790.164	925.553
EEF1A2	Q05639	EF1A2_HUMAN	Elongation factor 1-alpha 2 OS=Homo sapiens OX=9606 GN=EEF1A2 PE=1 SV=1	9.49	50812.4	3024.49	14	62.42	342.709	367.439	234.655	246.002	280.367	254.679	268.464	363.382	212.607	271.703	284.201
TUFM	P49411	EFTU_HUMAN	Elongation factor Tu_ mitochondrial OS=Homo sapiens OX=9606 GN=TUFM PE=1 SV=2	7.39	49883.8	981.362	9	32.96	123.672	127.009	149.663	152.126	100.246	97.6693	157.772	164.817	99.3375	136.231	130.854
ENDOD1	O94919	ENDD1_HUMAN	Endonuclease domain-containing 1 protein OS=Homo sapiens OX=9606 GN=ENDOD1 PE=1 SV=2	5.4	55758	2386.53	9	44	246.614	246.139	302.75	364.06	238.554	179.533	319.065	336.655	200.474	250.433	268.428
HSPA5	P11021	BIP_HUMAN	Endoplasmic reticulum chaperone BiP OS=Homo sapiens OX=9606 GN=HSPA5 PE=1 SV=2	4.88	72447.1	1311.15	8	15.9	70.6158	79.991	88.2849	78.3562	62.518	59.1591	78.4377	80.2885	73.0495	51.1778	72.1878
EZR	P15311	EZRI_HUMAN	Ezrin OS=Homo sapiens OX=9606 GN=EZR PE=1 SV=4	5.9	69527	826.875	7	13.82	58.3551	55.6742	108.231	117.953	76.4486	80.2869	76.5881	84.2087	72.3174	65.8481	79.5911
FSCN1	Q16658	FSCN1_HUMAN	Fascin OS=Homo sapiens OX=9606 GN=FSCN1 PE=1 SV=3	6.9	55157.3	2120.65	15	44.42	341.126	363.223	285.408	263.667	360.747	354.417	287.3	320.881	472.36	491.858	354.099
FHL1	Q13642	FHL1_HUMAN	Four and a half LIM domains protein 1 OS=Homo sapiens OX=9606 GN=FHL1 PE=1 SV=4	9.05	38030.9	2230.82	9	37.46	71.3093	69.5755	150.298	145.806	199.045	194.956	100.941	107.588	99.7827	91.143	123.045
ALDOA	P04075	ALDOA_HUMAN	Fructose-bisphosphate aldolase A OS=Homo sapiens OX=9606 GN=ALDOA PE=1 SV=2	8.07	39876.3	3589.8	21	80.77	392.671	400.314	363.581	364.008	269.765	270.705	404.174	445.744	415.305	407.23	373.35
ALDOC	P09972	ALDOC_HUMAN	Fructose-bisphosphate aldolase C OS=Homo sapiens OX=9606 GN=ALDOC PE=1 SV=2	6.47	39855.1	1760.27	12	54.95	132.575	129.03	117.114	107.786	114.028	106.404	142.79	145.255	163.589	147.014	130.558
ENO2	P09104	ENOG_HUMAN	Gamma-enolase OS=Homo sapiens OX=9606 GN=ENO2 PE=1 SV=3	4.72	47610.8	5492	9	35.48	118.614	125.074	113.019	114.71	144.284	142.74	143.196	154.024	139.101	140.097	133.486
NAPG	Q99747	SNAG_HUMAN	Gamma-soluble NSF attachment protein OS=Homo sapiens OX=9606 GN=NAPG PE=1 SV=1	5.13	35088.5	519.616	2	10.58	47.9215	44.4723	49.1094	47.2344	41.8664	37.5668	43.4331	54.3946	62.101	37.1133	46.5213
GSN	P06396	GELS_HUMAN	Gelsolin OS=Homo sapiens OX=9606 GN=GSN PE=1 SV=1	5.87	86096.8	1891.83	22	44.25	765.873	727.721	881.748	949.947	584.919	632.573	712.93	733.368	943.78	833.503	776.636
GFAP	P14136	GFAP_HUMAN	Glial fibrillary acidic protein OS=Homo sapiens OX=9606 GN=GFAP PE=1 SV=1	5.26	49937.3	44373.4	33	78.24	8793	7592.25	13506.7	13046.6	19846.8	19735.4	1447.06	1660.43	533.249	620.332	8678.18
GPI	P06744	G6PI_HUMAN	Glucose-6-phosphate isomerase OS=Homo sapiens OX=9606 GN=GPI PE=1 SV=4	8.49	63375.4	5143.18	22	49.46	980.449	1012.35	792.897	800.629	1191.65	1150.77	1171.54	1196.12	1674.4	1451.53	1142.23
GLUD1	P00367	DHE3_HUMAN	Glutamate dehydrogenase 1_ mitochondrial OS=Homo sapiens OX=9606 GN=GLUD1 PE=1 SV=2	7.72	61740.1	1234.33	11	32.26	322.046	323.102	310.095	291.539	126.888	124.598	255.729	273.979	163.279	139.596	233.085
GLUL	P15104	GLNA_HUMAN	Glutamine synthetase OS=Homo sapiens OX=9606 GN=GLUL PE=1 SV=4	6.48	42691.8	1094.45	5	51.74	76.9405	84.2145	57.5046	67.738	37.2213	61.4005	67.6088	85.2447	129.693	66.912	73.4477
LANCL1	O43813	LANC1_HUMAN	Glutathione S-transferase LANCL1 OS=Homo sapiens OX=9606 GN=LANCL1 PE=1 SV=1	7.63	46024.5	1776.32	10	32.33	300.703	289.968	439.051	444.887	437.46	409.707	308.297	315.083	433.971	453.956	383.308
GAPDH	P04406	G3P_HUMAN	Glyceraldehyde-3-phosphate dehydrogenase OS=Homo sapiens OX=9606 GN=GAPDH PE=1 SV=3	8.73	36224.4	38421.4	16	69.85	6990.46	6351.36	4619.83	4741.77	2005.3	1984.03	3250.34	3559.06	2317.49	2162.06	3798.17
ENPP6	Q6UWR7	ENPP6_HUMAN	Glycerophosphocholine cholinephosphodiesterase ENPP6 OS=Homo sapiens OX=9606 GN=ENPP6 PE=1 SV=2	7.98	50583.3	5628.11	10	32.95	536.24	518.927	548.377	404.592	437.606	377.644	426.368	440.055	549.578	445.529	468.492
GLIPR2	Q9H4G4	GAPR1_HUMAN	Golgi-associated plant pathogenesis-related protein 1 OS=Homo sapiens OX=9606 GN=GLIPR2 PE=1 SV=3	9.91	17332.4	7445.44	6	59.74	127.285	123.148	164.245	157.933	206.973	199.904	143.42	144.765	271.539	220.012	175.922
KRAS	P01116	RASK_HUMAN	GTPase KRas OS=Homo sapiens OX=9606 GN=KRAS PE=1 SV=1	6.4	21941	1164.99	6	41.27	52.2431	47.4115	44.812	45.8191	46.5068	49.6271	45.0974	54.4128	46.3465	46.9524	47.9229
GNAI3	P08754	GNAI3_HUMAN	Guanine nucleotide-binding protein G(i) subunit alpha OS=Homo sapiens OX=9606 GN=GNAI3 PE=1 SV=3	5.37	41102.5	3042.38	7	18.64	12.3528	14.7382	17.7441	17.2028	19.7393	18.1617	14.3722	16.5215	15.6714	13.7225	16.0226
GNAI1	P63096	GNAI1_HUMAN	Guanine nucleotide-binding protein G(i) subunit alpha-1 OS=Homo sapiens OX=9606 GN=GNAI1 PE=1 SV=2	5.61	40931.4	6626.75	15	48.02	203.61	225.858	283.209	280.835	321.028	317.936	259.042	318.192	292.278	277.41	277.94
GNAI2	P04899	GNAI2_HUMAN	Guanine nucleotide-binding protein G(i) subunit alpha-2 OS=Homo sapiens OX=9606 GN=GNAI2 PE=1 SV=3	5.2	41021.3	6162.9	16	58.03	242.574	225.921	274.678	276.585	305.675	278.795	288.767	296.089	295.319	267.498	275.19
GNG3	P63215	GBG3_HUMAN	Guanine nucleotide-binding protein G(I)/G(S)/G(O) subunit gamma-3 OS=Homo sapiens OX=9606 GN=GNG3 PE=1 SV=1	7.83	8532.89	2025.45	2	60	14.126	15.0836	22.2406	21.9837	22.7871	17.8544	17.3488	12.6288	21.1749	16.8956	18.2123
GNG7	O60262	GBG7_HUMAN	Guanine nucleotide-binding protein G(I)/G(S)/G(O) subunit gamma-7 OS=Homo sapiens OX=9606 GN=GNG7 PE=1 SV=1	8.87	7635.83	24654.1	5	67.65	137.037	120.581	146.406	152.716	167.768	162.447	144.268	144.278	183.852	170.069	152.942
GNB1	P62873	GBB1_HUMAN	Guanine nucleotide-binding protein G(I)/G(S)/G(T) subunit beta-1 OS=Homo sapiens OX=9606 GN=GNB1 PE=1 SV=3	5.56	38175.4	21588.2	14	80	952.032	898.887	1085.06	1253.26	1214.36	1171.86	1135.64	1181.62	1070.77	1124.6	1108.81
GNB2	P62879	GBB2_HUMAN	Guanine nucleotide-binding protein G(I)/G(S)/G(T) subunit beta-2 OS=Homo sapiens OX=9606 GN=GNB2 PE=1 SV=3	5.56	38072.5	9434.26	13	66.18	205.704	195.492	232.48	269.227	247.172	251.211	233.621	260.709	231.42	238.718	236.575
GNB3	P16520	GBB3_HUMAN	Guanine nucleotide-binding protein G(I)/G(S)/G(T) subunit beta-3 OS=Homo sapiens OX=9606 GN=GNB3 PE=1 SV=1	5.28	38190.7	1110.2	3	7.35	117.639	92.8761	137.325	123.608	150.863	128.081	126.212	111.563	175.704	138.631	130.25
GNAO1	P09471	GNAO_HUMAN	Guanine nucleotide-binding protein G(o) subunit alpha OS=Homo sapiens OX=9606 GN=GNAO1 PE=1 SV=4	5.2	40620.9	7189.55	16	59.04	608.109	578.928	919.226	858.469	789.793	775.116	762.262	776.06	829.159	714.909	761.203
GNAL	P38405	GNAL_HUMAN	Guanine nucleotide-binding protein G(olf) subunit alpha OS=Homo sapiens OX=9606 GN=GNAL PE=1 SV=1	6.25	44821.8	1645.91	2	10.5	27.8559	34.1341	14.9487	49.0685	17.3085	0	37.3479	40.5717	12.5685	22.4039	25.6208
GNAQ	P50148	GNAQ_HUMAN	Guanine nucleotide-binding protein G(q) subunit alpha OS=Homo sapiens OX=9606 GN=GNAQ PE=1 SV=4	5.35	42427.3	3113.31	12	50.42	218.16	223.027	298.625	312.003	317.364	266.261	235.422	244.226	259.708	289.564	266.436
GNAS	Q5JWF2	GNAS1_HUMAN	Guanine nucleotide-binding protein G(s) subunit alpha isoforms XLas OS=Homo sapiens OX=9606 GN=GNAS PE=1 SV=2	4.73	111766	2098.38	9	17.65	303.432	259.199	380.679	435.647	472.405	531.889	356.195	355.208	562.86	392.104	404.962
GNAT1	P11488	GNAT1_HUMAN	Guanine nucleotide-binding protein G(t) subunit alpha-1 OS=Homo sapiens OX=9606 GN=GNAT1 PE=1 SV=5	5.28	40497.1	1689.21	3	8.57	10.1654	3.76027	13.0829	13.0785	11.1108	10.7392	13.3955	3.25398	15.1143	20.9823	11.4683
GNAT3	A8MTJ3	GNAT3_HUMAN	Guanine nucleotide-binding protein G(t) subunit alpha-3 OS=Homo sapiens OX=9606 GN=GNAT3 PE=2 SV=2	5.63	40870.3	1689.21	2	9.04	9.7699	3.61395	16.1614	12.5696	15.1811	10.3213	12.8742	3.12737	22.82	12.3277	11.8767
GNAZ	P19086	GNAZ_HUMAN	Guanine nucleotide-binding protein G(z) subunit alpha OS=Homo sapiens OX=9606 GN=GNAZ PE=1 SV=3	7.5	41437.1	871.731	6	23.66	101.684	104.829	81.2919	88.617	88.1804	79.8426	91.4963	99.1269	87.2349	84.5426	90.6846
GNA11	P29992	GNA11_HUMAN	Guanine nucleotide-binding protein subunit alpha-11 OS=Homo sapiens OX=9606 GN=GNA11 PE=1 SV=2	5.38	42408.6	1028.02	5	21.45	35.7647	39.2243	57.1497	49.6648	66.4013	62.6375	48.8405	49.8014	68.8503	62.2175	54.0552
GNA13	Q14344	GNA13_HUMAN	Guanine nucleotide-binding protein subunit alpha-13 OS=Homo sapiens OX=9606 GN=GNA13 PE=1 SV=2	8	44391.8	1819.65	10	37.14	95.4338	120.759	196.001	141.542	198.235	224.19	73.5887	107.557	164.701	167.312	148.932
GNA14	O95837	GNA14_HUMAN	Guanine nucleotide-binding protein subunit alpha-14 OS=Homo sapiens OX=9606 GN=GNA14 PE=1 SV=1	5.72	42026.9	506.109	5	15.49	66.3921	70.9891	92.4627	87.2204	103.695	91.6273	70.1294	75.514	98.2462	90.7008	84.6977
GNB4	Q9HAV0	GBB4_HUMAN	Guanine nucleotide-binding protein subunit beta-4 OS=Homo sapiens OX=9606 GN=GNB4 PE=1 SV=3	5.58	38308.6	9100.55	7	55.88	191.613	178.049	121.356	142.41	98.7591	120.558	153.037	173.365	107.517	117.2	140.387
HSPA12A	O43301	HS12A_HUMAN	Heat shock 70 kDa protein 12A OS=Homo sapiens OX=9606 GN=HSPA12A PE=1 SV=2	6.35	75263.6	4720.03	23	48.89	760.218	730.692	783.825	762.266	548.638	534.137	800.195	832.022	405.457	333.346	649.08
HSPA1L	P34931	HS71L_HUMAN	Heat shock 70 kDa protein 1-like OS=Homo sapiens OX=9606 GN=HSPA1L PE=1 SV=2	5.66	70774.3	1841.68	12	28.39	41.5626	42.2711	41.7412	45.5895	63.7199	60.6051	48.4046	45.593	40.8316	38.4707	46.8789
HSPA6	P17066	HSP76_HUMAN	Heat shock 70 kDa protein 6 OS=Homo sapiens OX=9606 GN=HSPA6 PE=1 SV=2	5.75	71484.5	1756.46	9	26.59	62.5217	62.7399	217.906	68.5219	121.386	118.658	59.5371	64.6367	116.947	58.1478	95.1002
HSPA8	P11142	HSP7C_HUMAN	Heat shock cognate 71 kDa protein OS=Homo sapiens OX=9606 GN=HSPA8 PE=1 SV=1	5.2	71126.3	4380.58	23	54.33	588.478	576.706	466.931	478.788	455.596	454.155	536.506	521.191	502.325	467.598	504.827
HSP90AA1	P07900	HS90A_HUMAN	Heat shock protein HSP 90-alpha OS=Homo sapiens OX=9606 GN=HSP90AA1 PE=1 SV=5	4.75	85059.1	2053.94	19	37.57	311.307	457.628	426.385	484.44	360.308	376.098	454.598	377.439	405.165	479.146	413.251
HSP90AB1	P08238	HS90B_HUMAN	Heat shock protein HSP 90-beta OS=Homo sapiens OX=9606 GN=HSP90AB1 PE=1 SV=4	4.77	83606.5	2050.3	18	41.16	252.831	227.561	158.043	159.118	95.9269	89.6148	239.775	220.804	117.812	110.301	167.179
HSPA2	P54652	HSP72_HUMAN	Heat shock-related 70 kDa protein 2 OS=Homo sapiens OX=9606 GN=HSPA2 PE=1 SV=1	5.42	70306.2	4884.77	26	54.93	526.809	496.657	542.489	564.699	541.35	554.216	487.729	517.672	577.998	595.359	540.498
HEPACAM	Q14CZ8	HECAM_HUMAN	Hepatocyte cell adhesion molecule OS=Homo sapiens OX=9606 GN=HEPACAM PE=1 SV=1	9.5	46254.6	1303.82	7	25.72	134.479	129.503	383.309	360.003	233.981	215.601	254.77	260.099	130.623	137.307	223.968
HDAC11	Q96DB2	HDA11_HUMAN	Histone deacetylase 11 OS=Homo sapiens OX=9606 GN=HDAC11 PE=1 SV=1	7.53	39297.2	912.757	6	23.92	59.6207	59.674	108.098	97.2815	120.849	114.06	88.0265	93.5384	104.568	108.227	95.3943
H3-3A	P84243	H33_HUMAN	Histone H3.3 OS=Homo sapiens OX=9606 GN=H3-3A PE=1 SV=2	11.81	15385	3477.91	3	35.29	83.099	91.5446	96.1197	80.5018	36.1395	39.9432	25.2474	23.8661	57.8186	43.2232	57.7503
H4C1	P62805	H4_HUMAN	Histone H4 OS=Homo sapiens OX=9606 GN=H4C1 PE=1 SV=2	11.89	11367.4	9372.69	7	58.25	241.539	216.713	208.488	215.013	77.8019	75.0133	62.5271	61.5129	123.129	115.459	139.72
HAPLN2	Q9GZV7	HPLN2_HUMAN	Hyaluronan and proteoglycan link protein 2 OS=Homo sapiens OX=9606 GN=HAPLN2 PE=2 SV=1	8.88	38402.4	1688.4	8	30.59	250.008	277.384	74.6245	110.741	113.575	100.612	159.77	176.399	196.359	187.148	164.662
IGKC	P01834	IGKC_HUMAN	Immunoglobulin kappa constant OS=Homo sapiens OX=9606 GN=IGKC PE=1 SV=2	6.13	11936.1	1476.08	3	51.4	17.2593	15.9386	53.2003	36.8753	23.5525	28.8727	45.6667	48.224	19.0533	10.592	29.9235
IGSF8	Q969P0	IGSF8_HUMAN	Immunoglobulin superfamily member 8 OS=Homo sapiens OX=9606 GN=IGSF8 PE=1 SV=1	7.9	65661.6	4434.59	16	40.95	239.181	233.431	311.253	314.311	376.72	356.162	246.927	261.402	520.358	490.836	335.058
INF2	Q27J81	INF2_HUMAN	Inverted formin-2 OS=Homo sapiens OX=9606 GN=INF2 PE=1 SV=2	5.09	136936	569.816	13	23.06	207.959	198.5	274.486	276.134	202.632	184.993	247.632	278.587	216.03	209.35	229.63
IDH2	P48735	IDHP_HUMAN	Isocitrate dehydrogenase [NADP]_ mitochondrial OS=Homo sapiens OX=9606 GN=IDH2 PE=1 SV=2	8.91	51365.6	1205.12	7	21.68	124.393	123.482	127.95	125.995	112.339	109.053	118.965	129.186	125.987	116.122	121.347
JAM3	Q9BX67	JAM3_HUMAN	Junctional adhesion molecule C OS=Homo sapiens OX=9606 GN=JAM3 PE=1 SV=1	7.46	35590.3	1682.66	7	33.55	102.485	101.049	216.319	217.322	184.252	174.866	156.74	183.522	152.377	189.308	167.824
LLGL1	Q15334	L2GL1_HUMAN	Lethal(2) giant larvae protein homolog 1 OS=Homo sapiens OX=9606 GN=LLGL1 PE=1 SV=3	5.87	116730	535.909	8	12.41	424.43	353.231	494.899	537.661	1006.15	947.22	811.906	865.552	467.157	438.708	634.691
LGI3	Q8N145	LGI3_HUMAN	Leucine-rich repeat LGI family member 3 OS=Homo sapiens OX=9606 GN=LGI3 PE=2 SV=1	7.82	62445.9	760.329	8	19.16	133.519	143.993	113.138	140.597	154.188	152.15	107.123	111.86	135.756	139.043	133.137
CD47	Q08722	CD47_HUMAN	Leukocyte surface antigen CD47 OS=Homo sapiens OX=9606 GN=CD47 PE=1 SV=1	7	35612.9	908.009	2	5.26	208.362	204.336	366.583	352.296	371.505	262.484	274.965	285.874	302.129	239.834	286.837
LSAMP	Q13449	LSAMP_HUMAN	Limbic system-associated membrane protein OS=Homo sapiens OX=9606 GN=LSAMP PE=1 SV=2	6.62	37906.8	1260.74	6	24.85	50.0851	59.8745	89.2294	101.171	81.8264	69.3976	78.0337	76.2925	77.8533	75.1479	75.8912
LDHA	P00338	LDHA_HUMAN	L-lactate dehydrogenase A chain OS=Homo sapiens OX=9606 GN=LDHA PE=1 SV=2	8.38	36973.9	961.656	5	23.49	68.8745	66.5606	51.0766	54.4696	51.3737	49.5029	87.7989	91.0235	91.3161	63.8916	67.5888
LDHB	P07195	LDHB_HUMAN	L-lactate dehydrogenase B chain OS=Homo sapiens OX=9606 GN=LDHB PE=1 SV=2	5.66	36923.7	795.538	6	24.25	81.5193	72.8613	68.173	66.0042	62.9769	59.298	92.1737	88.4794	92.0691	78.249	76.1804
LYNX1	P0DP58	LYNX1_HUMAN	Ly-6/neurotoxin-like protein 1 OS=Homo sapiens OX=9606 GN=LYNX1 PE=1 SV=1	7.72	13211.3	4186.08	3	25.86	35.0684	32.1233	48.2858	56.8518	55.7843	48.0913	40.3091	41.4944	48.4656	43.6285	45.0102
MIF	P14174	MIF_HUMAN	Macrophage migration inhibitory factor OS=Homo sapiens OX=9606 GN=MIF PE=1 SV=4	7.98	12647.4	4281.41	2	26.09	177.908	133.699	118.631	172.732	127.957	138.393	167.309	155.651	178.764	165.334	153.638
PRNP	P04156	PRIO_HUMAN	Major prion protein OS=Homo sapiens OX=9606 GN=PRNP PE=1 SV=1	9.23	27889.4	855.496	5	27.67	80.5618	80.9667	141.629	166.801	152.023	143.529	116.586	121.598	198.094	179.958	138.175
MDH1	P40925	MDHC_HUMAN	Malate dehydrogenase_ cytoplasmic OS=Homo sapiens OX=9606 GN=MDH1 PE=1 SV=4	7.19	36654.3	892.723	4	16.47	81.3091	99.8391	71.0266	73.3769	88.3357	80.4676	79.7861	86.0828	123.246	118.597	90.2067
MDH2	P40926	MDHM_HUMAN	Malate dehydrogenase_ mitochondrial OS=Homo sapiens OX=9606 GN=MDH2 PE=1 SV=3	8.86	35959.6	4221.48	13	51.78	225.206	209.957	302.164	254.02	137.293	138.371	259.939	250.483	180.232	170.211	212.788
MAP6D1	Q9H9H5	MA6D1_HUMAN	MAP6 domain-containing protein 1 OS=Homo sapiens OX=9606 GN=MAP6D1 PE=1 SV=1	10.6	21175.6	1446.59	4	33.67	67.6571	68.0473	51.1277	105.298	239.459	233.715	165.113	173.013	116.851	108.814	132.91
MARCKSL1	P49006	MRP_HUMAN	MARCKS-related protein OS=Homo sapiens OX=9606 GN=MARCKSL1 PE=1 SV=2	4.45	19585.8	1051.95	3	43.59	20.8749	11.9911	23.214	19.1842	25.6641	21.4133	21.6995	16.6327	41.0779	31.2539	23.3006
PGRMC1	O00264	PGRC1_HUMAN	Membrane-associated progesterone receptor component 1 OS=Homo sapiens OX=9606 GN=PGRMC1 PE=1 SV=3	4.34	21785.2	1676.5	4	37.95	59.1196	57.1735	49.1101	55.4817	46.7332	35.1167	64.3843	66.6822	52.9221	36.1781	52.2901
ALDH6A1	Q02252	MMSA_HUMAN	Methylmalonate-semialdehyde dehydrogenase [acylating]_ mitochondrial OS=Homo sapiens OX=9606 GN=ALDH6A1 PE=1 SV=2	8.61	58296.1	1462.38	12	40.93	202.683	220.847	419.718	470.143	249.752	255.662	276.273	304.555	191.856	228.432	281.992
MAP1B	P46821	MAP1B_HUMAN	Microtubule-associated protein 1B OS=Homo sapiens OX=9606 GN=MAP1B PE=1 SV=2	4.54	271832	1824.79	64	48.46	2903.73	2734.85	2173.05	2420.38	2216.99	2101.18	2403.02	2805.57	2318.83	1998.97	2407.66
MAPRE1	Q15691	MARE1_HUMAN	Microtubule-associated protein RP/EB family member 1 OS=Homo sapiens OX=9606 GN=MAPRE1 PE=1 SV=3	4.83	30170.2	645.942	4	30.97	26.1818	22.3742	28.8009	33.2572	45.8774	27.2415	34.1944	27.4721	48.9512	34.0772	32.8428
MAPRE2	Q15555	MARE2_HUMAN	Microtubule-associated protein RP/EB family member 2 OS=Homo sapiens OX=9606 GN=MAPRE2 PE=1 SV=1	5.24	37259.5	1304.27	8	48.93	144.547	132.306	112.249	141.241	138.268	106.062	145.637	132.722	138.504	122.702	131.424
MAPT	P10636	TAU_HUMAN	Microtubule-associated protein tau OS=Homo sapiens OX=9606 GN=MAPT PE=1 SV=5	6.28	79155.8	753.307	5	12.66	290.045	223.953	265.098	245.57	359.309	235.667	291.948	257.193	365.762	253.977	278.852
SLC25A22	Q9H936	GHC1_HUMAN	Mitochondrial glutamate carrier 1 OS=Homo sapiens OX=9606 GN=SLC25A22 PE=1 SV=1	9.66	34926.5	717.722	2	18.89	37.6883	38.3119	71.4414	61.0743	40.6427	36.664	36.703	47.6264	45.9721	52.1245	46.8249
MAPK1	P28482	MK01_HUMAN	Mitogen-activated protein kinase 1 OS=Homo sapiens OX=9606 GN=MAPK1 PE=1 SV=3	6.57	41789	634.651	5	29.72	199.766	186.122	223.455	225.166	188.256	221.995	195.544	204.503	263.235	214.084	212.212
MSN	P26038	MOES_HUMAN	Moesin OS=Homo sapiens OX=9606 GN=MSN PE=1 SV=3	6.03	67934.2	1383.3	16	41.07	375.375	443.587	950.258	1118.05	551.144	533.79	779.386	777.747	1035.47	1114.09	767.889
BIN1	O00499	BIN1_HUMAN	Myc box-dependent-interacting protein 1 OS=Homo sapiens OX=9606 GN=BIN1 PE=1 SV=1	4.79	64927.6	2115.44	14	39.29	299.638	267.076	464.995	438.167	336.547	302.514	311.818	359.096	384.346	372.431	353.663
MBP	P02686	MBP_HUMAN	Myelin basic protein OS=Homo sapiens OX=9606 GN=MBP PE=1 SV=3	10.45	33117.1	31173.9	14	55.92	268192	281053	280743	267177	292517	314329	272524	263190	329205	265918	283485
PMP2	P02689	MYP2_HUMAN	Myelin P2 protein OS=Homo sapiens OX=9606 GN=PMP2 PE=1 SV=3	10.54	15023.5	16306.8	11	71.21	819.321	712.882	313.73	330.479	381.613	358.97	505.744	517.859	848.772	765.405	555.478
PLP1	P60201	MYPR_HUMAN	Myelin proteolipid protein OS=Homo sapiens OX=9606 GN=PLP1 PE=1 SV=2	8.29	30875.6	33549.1	11	37.55	436274	438661	435517	428413	443878	427831	455416	443875	455914	515251	448103
MAG	P20916	MAG_HUMAN	Myelin-associated glycoprotein OS=Homo sapiens OX=9606 GN=MAG PE=1 SV=1	4.79	69924	5404.17	14	30.83	2270.62	1990.14	2535.87	3181.09	3060.02	3019.37	2165.12	2338.06	2803.1	2582.74	2594.61
MOBP	Q13875	MOBP_HUMAN	Myelin-associated oligodendrocyte basic protein OS=Homo sapiens OX=9606 GN=MOBP PE=1 SV=2	11.88	21358.2	9866.06	4	29.51	649.323	632.964	1753.41	1862.7	1202.09	1117.59	738.454	791.234	1472.95	1399.06	1161.98
MOG	Q16653	MOG_HUMAN	Myelin-oligodendrocyte glycoprotein OS=Homo sapiens OX=9606 GN=MOG PE=1 SV=2	8.59	28592.3	28011.1	12	49.8	5976.29	5196.5	9238.3	9351.72	8800.32	8654.99	6621.88	6801.34	10445.6	9614	8070.1
MYADM	Q96S97	MYADM_HUMAN	Myeloid-associated differentiation marker OS=Homo sapiens OX=9606 GN=MYADM PE=1 SV=2	8.06	36072	2659.56	4	19.25	309.622	283.054	423.091	461.279	465.11	432.406	273.505	280.478	430.592	401.574	376.071
SIRT2	Q8IXJ6	SIR2_HUMAN	NAD-dependent protein deacetylase sirtuin-2 OS=Homo sapiens OX=9606 GN=SIRT2 PE=1 SV=2	5.06	43809.5	19119.2	19	69.15	883.285	880.553	1899.19	1865.36	1669.84	1571.75	1249.6	1238.13	1865.39	1773.75	1489.68
NDUFV1	P49821	NDUV1_HUMAN	NADH dehydrogenase [ubiquinone] flavoprotein 1_ mitochondrial OS=Homo sapiens OX=9606 GN=NDUFV1 PE=1 SV=4	8.16	51501.5	926.031	9	31.68	94.2067	102.78	92.9835	92.426	74.123	65.4302	78.9081	102.182	46.3865	65.0856	81.4512
CYB5R3	P00387	NB5R3_HUMAN	NADH-cytochrome b5 reductase 3 OS=Homo sapiens OX=9606 GN=CYB5R3 PE=1 SV=3	7.41	34463	973.829	4	27.24	65.167	68.0146	55.6005	78.9317	53.455	59.4563	85.6965	87.2781	43.8112	57.5722	65.4983
NDUFS1	P28331	NDUS1_HUMAN	NADH-ubiquinone oxidoreductase 75 kDa subunit_ mitochondrial OS=Homo sapiens OX=9606 GN=NDUFS1 PE=1 SV=3	5.84	80494.2	770.809	6	15.13	169.385	163.703	187.616	180.83	142.162	149.027	178.511	195.683	137.884	133.067	163.787
NCAM1	P13591	NCAM1_HUMAN	Neural cell adhesion molecule 1 OS=Homo sapiens OX=9606 GN=NCAM1 PE=1 SV=3	4.6	95429.7	2533.88	23	46.04	494.308	465.437	915.265	905.358	788.226	751.034	815.136	815.803	719.138	731.228	740.093
NFASC	O94856	NFASC_HUMAN	Neurofascin OS=Homo sapiens OX=9606 GN=NFASC PE=1 SV=4	6.24	150882	1528.62	30	36.01	1740.19	1536.14	2774.44	2961.32	2985.55	3006.01	2269.06	2583.85	2719.02	2435.78	2501.14
NEFH	P12036	NFH_HUMAN	Neurofilament heavy polypeptide OS=Homo sapiens OX=9606 GN=NEFH PE=1 SV=4	5.89	112707	10347.3	33	35.87	6014.54	5698.14	1983.08	1927.67	1132.02	1133.54	4388.93	4428.2	1179.93	1042.84	2892.89
NEFL	P07196	NFL_HUMAN	Neurofilament light polypeptide OS=Homo sapiens OX=9606 GN=NEFL PE=1 SV=3	4.43	61573.7	45578.7	46	83.79	15256.4	14038.9	5822.21	6016.67	3098.03	3298.84	9163.53	9912.88	2560.13	2670.4	7183.8
NEFM	P07197	NFM_HUMAN	Neurofilament medium polypeptide OS=Homo sapiens OX=9606 GN=NEFM PE=1 SV=3	4.7	102529	18850.7	46	55.68	17041.6	15313.1	8144.03	7658.46	4453.31	4339.31	12965.4	13200.1	4101.99	3832.36	9104.97
NME1	P15531	NDKA_HUMAN	Nucleoside diphosphate kinase A OS=Homo sapiens OX=9606 GN=NME1 PE=1 SV=1	5.79	17319.8	4485.88	8	51.32	91.7396	81.0429	98.3832	96.9676	106.155	84.1748	78.5138	76.9761	98.9046	77.0371	88.9895
NME2	P22392	NDKB_HUMAN	Nucleoside diphosphate kinase B OS=Homo sapiens OX=9606 GN=NME2 PE=1 SV=1	8.75	17412.1	4791.97	11	84.21	117.259	97.0947	115.759	126.87	129.938	109.044	104.675	98.577	117.827	96.1362	111.318
OPALIN	Q96PE5	OPALI_HUMAN	Opalin OS=Homo sapiens OX=9606 GN=OPALIN PE=2 SV=1	5.79	15796.9	4085.3	5	46.1	20.9569	23.8272	148.594	162.929	82.1741	83.1197	67.4402	75.3715	94.6835	86.012	84.5108
PPIA	P62937	PPIA_HUMAN	Peptidyl-prolyl cis-trans isomerase A OS=Homo sapiens OX=9606 GN=PPIA PE=1 SV=2	7.85	18240.6	11663.9	9	81.21	468.373	402.205	353.055	370.23	316.421	297.492	369.649	376.913	448.519	399.759	380.262
PIN1	Q13526	PIN1_HUMAN	Peptidyl-prolyl cis-trans isomerase NIMA-interacting 1 OS=Homo sapiens OX=9606 GN=PIN1 PE=1 SV=1	9.26	18357.4	1015.74	2	25.15	63.5719	56.1296	18.8076	34.216	18.504	14.504	37.5403	41.8643	0	20.4925	30.563
PRDX1	Q06830	PRDX1_HUMAN	Peroxiredoxin-1 OS=Homo sapiens OX=9606 GN=PRDX1 PE=1 SV=1	8.24	22338.5	16310.8	14	75.38	656.049	626.476	1389.23	1370.64	1099.01	1079.84	861.47	900.766	813.616	697.641	949.473
PRDX2	P32119	PRDX2_HUMAN	Peroxiredoxin-2 OS=Homo sapiens OX=9606 GN=PRDX2 PE=1 SV=5	5.58	22063	7372.34	12	75.76	187.43	226.39	364.638	368.606	378.925	384.046	285.543	336.467	281.872	268.855	308.277
PRDX4	Q13162	PRDX4_HUMAN	Peroxiredoxin-4 OS=Homo sapiens OX=9606 GN=PRDX4 PE=1 SV=1	5.87	30768	1483.91	4	22.88	21.5957	24.6079	40.3737	46.0227	37.9352	37.7505	26.1014	32.9028	28.6807	33.2862	32.9257
SLC25A3	Q00325	MPCP_HUMAN	Phosphate carrier protein_ mitochondrial OS=Homo sapiens OX=9606 GN=SLC25A3 PE=1 SV=2	9.77	40551.2	678.072	7	23.76	150.119	147.295	171.988	183.872	119.344	109.2	176.499	193.99	105.012	101.886	145.921
PEBP1	P30086	PEBP1_HUMAN	Phosphatidylethanolamine-binding protein 1 OS=Homo sapiens OX=9606 GN=PEBP1 PE=1 SV=3	7.41	21170.9	31025.8	12	80.75	468.463	474.234	570.108	665.418	588.327	641.822	566.826	624.317	539.22	665.16	580.39
PGAM1	P18669	PGAM1_HUMAN	Phosphoglycerate mutase 1 OS=Homo sapiens OX=9606 GN=PGAM1 PE=1 SV=2	6.82	28918	1376.07	3	18.11	73.3696	65.7069	83.092	67.2065	68.2475	74.7278	116.496	85.7083	85.0931	94.7259	81.4374
PLLP	Q9Y342	PLLP_HUMAN	Plasmolipin OS=Homo sapiens OX=9606 GN=PLLP PE=1 SV=1	9.55	20100.7	7895.88	2	21.43	558.487	565.399	1558.82	1706.71	1306.03	1319.31	1109.01	1199.67	1316.1	1393.99	1203.35
PAFAH1B1	P43034	LIS1_HUMAN	Platelet-activating factor acetylhydrolase IB subunit alpha OS=Homo sapiens OX=9606 GN=PAFAH1B1 PE=1 SV=2	7.04	47208.3	511.382	4	18.05	105.509	102.176	56.0883	57.8734	52.4962	51.5124	78.9515	90.1581	53.9966	48.688	69.7449
PLEKHB1	Q9UF11	PKHB1_HUMAN	Pleckstrin homology domain-containing family B member 1 OS=Homo sapiens OX=9606 GN=PLEKHB1 PE=1 SV=1	7.15	27585.2	4073.65	7	39.92	275.475	293.432	446.353	508.025	350.922	344.306	316.809	356.165	720.043	680.645	429.218
KCNA2	P16389	KCNA2_HUMAN	Potassium voltage-gated channel subfamily A member 2 OS=Homo sapiens OX=9606 GN=KCNA2 PE=1 SV=2	4.59	57173.1	511.863	5	18.64	140.032	113.711	112.122	124.395	165.019	169	108.578	112.294	159.598	138.389	134.314
ATP4A	P20648	ATP4A_HUMAN	Potassium-transporting ATPase alpha chain 1 OS=Homo sapiens OX=9606 GN=ATP4A PE=2 SV=5	5.46	115830	1135.86	8	11.21	347.21	632.24	335.759	328.413	360.454	484.298	336.515	601.333	347.936	280.569	405.473
ATP12A	P54707	AT12A_HUMAN	Potassium-transporting ATPase alpha chain 2 OS=Homo sapiens OX=9606 GN=ATP12A PE=1 SV=3	6.13	116366	1010.65	7	10.01	153.023	138.916	138.119	135.366	157.378	149.449	147.36	155.76	141.339	125.924	144.263
POTEE	Q6S8J3	POTEE_HUMAN	POTE ankyrin domain family member E OS=Homo sapiens OX=9606 GN=POTEE PE=2 SV=3	5.8	122961	5648.72	11	13.95	576.202	1535.7	957.254	810.03	352.401	436.828	704.279	1153	477.251	628.682	763.163
POTEI	P0CG38	POTEI_HUMAN	POTE ankyrin domain family member I OS=Homo sapiens OX=9606 GN=POTEI PE=3 SV=1	5.81	122936	2140.32	8	11.72	14520.3	7104.11	6266.98	5848.36	9320.76	8893.1	7323.88	11567.9	7760.82	7776.36	8638.25
PFN1	P07737	PROF1_HUMAN	Profilin-1 OS=Homo sapiens OX=9606 GN=PFN1 PE=1 SV=2	8.45	15225.3	1033.6	4	60	31.3237	29.7307	23.2118	31.8627	17.9914	17.6817	26.661	26.5532	32.1829	33.4448	27.0644
PHB	P35232	PHB_HUMAN	Prohibitin OS=Homo sapiens OX=9606 GN=PHB PE=1 SV=1	5.44	29861.1	647.1	5	30.88	55.8576	46.4916	67.2977	52.6685	50.2971	46.4284	57.4869	63.7222	38.2306	34.0153	51.2496
PDIA3	P30101	PDIA3_HUMAN	Protein disulfide-isomerase A3 OS=Homo sapiens OX=9606 GN=PDIA3 PE=1 SV=4	5.96	57181.6	359.528	3	12.48	65.1018	80.908	86.3924	91.832	56.8729	53.0229	75.5016	79.6536	53.5596	46.2487	68.9094
FAM49B	Q9NUQ9	FA49B_HUMAN	Protein FAM49B OS=Homo sapiens OX=9606 GN=FAM49B PE=1 SV=1	5.7	37033.2	685.181	4	20.37	48.3933	36.6887	42.0263	45.4481	52.8082	36.2772	43.4681	39.477	53.859	58.7747	45.7221
PRKCA	P17252	KPCA_HUMAN	Protein kinase C alpha type OS=Homo sapiens OX=9606 GN=PRKCA PE=1 SV=4	6.65	77890.6	561.612	8	24.11	92.0057	73.3959	109.456	108.153	106.296	108.814	114.923	116.34	87.7172	85.3452	100.245
PRKCB	P05771	KPCB_HUMAN	Protein kinase C beta type OS=Homo sapiens OX=9606 GN=PRKCB PE=1 SV=4	6.6	78009.7	676.402	14	31.74	130.748	117.853	167.927	176.207	158.479	149.388	171.157	164.713	142.889	136.074	151.544
PRKCG	P05129	KPCG_HUMAN	Protein kinase C gamma type OS=Homo sapiens OX=9606 GN=PRKCG PE=1 SV=3	7.19	79702.6	639.634	13	42.9	88.8506	195.353	180.083	173.939	157.502	145.231	170.459	213.781	122.123	129.588	157.691
NDRG1	Q92597	NDRG1_HUMAN	Protein NDRG1 OS=Homo sapiens OX=9606 GN=NDRG1 PE=1 SV=1	5.43	43291.8	2971.28	8	41.12	145.247	138.169	189.127	231.443	157.404	145.381	135.996	141.565	139.516	152.623	157.647
RUFY3	Q7L099	RUFY3_HUMAN	Protein RUFY3 OS=Homo sapiens OX=9606 GN=RUFY3 PE=1 SV=1	5.2	53250.2	790.571	10	29.21	189.218	183.779	161.705	150.894	115.786	112.815	176.115	181.6	101.315	84.8376	145.806
S100B	P04271	S100B_HUMAN	Protein S100-B OS=Homo sapiens OX=9606 GN=S100B PE=1 SV=2	4.33	10827.1	16834.6	2	40.22	152.642	123.086	91.0817	248.418	99.8562	97.1322	167.755	210.063	86.0495	136.41	141.249
SHISA4	Q96DD7	SHSA4_HUMAN	Protein shisa-4 OS=Homo sapiens OX=9606 GN=SHISA4 PE=2 SV=3	7.8	22263.5	1539.93	2	19.8	14.8671	19.3981	37.8303	42.857	41.5831	38.2133	22.6115	23.6916	60.3057	74.3773	37.5735
PADI2	Q9Y2J8	PADI2_HUMAN	Protein-arginine deiminase type-2 OS=Homo sapiens OX=9606 GN=PADI2 PE=1 SV=2	5.27	76305.4	3088.42	24	55.64	876.193	813.266	600.572	653.663	676.288	604.997	594.906	639.684	844.731	784.151	708.845
PCMT1	P22061	PIMT_HUMAN	Protein-L-isoaspartate(D-aspartate) O-methyltransferase OS=Homo sapiens OX=9606 GN=PCMT1 PE=1 SV=4	6.85	24807.5	1097.91	2	31.28	38.6694	35.0312	26.6134	34.4051	39.4572	26.3048	24.2996	39.4606	13.6077	20.8822	29.8731
TUBA4B	Q9H853	TBA4B_HUMAN	Putative tubulin-like protein alpha-4B OS=Homo sapiens OX=9606 GN=TUBA4B PE=5 SV=2	7.77	27836.4	5797.06	2	14.52	14.9558	15.7201	5.39114	10.0651	4.91855	10.9417	5.33082	9.03623	1.80305	2.98275	8.11453
PDXK	O00764	PDXK_HUMAN	Pyridoxal kinase OS=Homo sapiens OX=9606 GN=PDXK PE=1 SV=1	5.72	35330.5	1257.84	3	33.01	56.0416	56.2064	27.4873	29.5228	15.8474	14.0999	49.4626	54.9504	37.5543	0	34.1173
PDHB	P11177	ODPB_HUMAN	Pyruvate dehydrogenase E1 component subunit beta_ mitochondrial OS=Homo sapiens OX=9606 GN=PDHB PE=1 SV=3	6.23	39575.7	802.256	5	18.66	69.4563	78.1926	61.8584	68.3557	55.0974	42.9439	61.4099	64.5409	40.4227	36.3839	57.8662
PKLR	P30613	KPYR_HUMAN	Pyruvate kinase PKLR OS=Homo sapiens OX=9606 GN=PKLR PE=1 SV=2	7.64	62229.5	1017.01	4	6.62	428.336	378.374	347.585	333.558	400.159	373.75	342.788	351.67	445.046	401.363	380.263
PKM	P14618	KPYM_HUMAN	Pyruvate kinase PKM OS=Homo sapiens OX=9606 GN=PKM PE=1 SV=4	7.76	58507.3	11542.3	28	64.97	2169.95	2099.34	1226.63	1205.91	1295.56	1284.51	1470.7	1578.62	1390.58	1266.59	1498.84
GDI1	P31150	GDIA_HUMAN	Rab GDP dissociation inhibitor alpha OS=Homo sapiens OX=9606 GN=GDI1 PE=1 SV=2	4.81	51210.1	4442.45	16	59.06	3301.84	2772.5	2213.49	2170.21	3096.4	2888.73	2744.31	2720.46	3881.78	3541.15	2933.09
GDI2	P50395	GDIB_HUMAN	Rab GDP dissociation inhibitor beta OS=Homo sapiens OX=9606 GN=GDI2 PE=1 SV=2	6.08	51119.6	3082.14	22	68.54	130.791	138.725	117.51	103.4	116.241	112.972	150.434	154.331	171.322	152.838	134.856
RDX	P35241	RADI_HUMAN	Radixin OS=Homo sapiens OX=9606 GN=RDX PE=1 SV=1	5.99	68678.1	1908.94	17	34.99	196.085	185.659	362.564	373.468	301.618	291.702	226.189	197.619	238.771	232.593	260.627
RAC1	P63000	RAC1_HUMAN	Ras-related C3 botulinum toxin substrate 1 OS=Homo sapiens OX=9606 GN=RAC1 PE=1 SV=1	8.58	21849.3	7926.44	7	40.63	265.773	247.281	322.073	357.97	318.888	292.923	284.756	298.401	338.288	304.446	303.08
RAB10	P61026	RAB10_HUMAN	Ras-related protein Rab-10 OS=Homo sapiens OX=9606 GN=RAB10 PE=1 SV=1	8.58	22769.1	4313.15	10	55.5	83.9076	81.2653	90.9901	96.688	101.181	100.896	98.2411	101.545	113.403	120.188	98.8305
RAB12	Q6IQ22	RAB12_HUMAN	Ras-related protein Rab-12 OS=Homo sapiens OX=9606 GN=RAB12 PE=1 SV=3	8.51	27590.6	1182.69	2	11.89	0	37.6726	145.08	0	104.399	117.693	0	0	53.1338	59.5138	51.7493
RAB13	P51153	RAB13_HUMAN	Ras-related protein Rab-13 OS=Homo sapiens OX=9606 GN=RAB13 PE=1 SV=1	9.72	23002.3	709.471	2	24.14	8.19118	7.84658	9.53687	11.793	16.887	11.4023	10.3198	9.23931	15.2699	13.7259	11.4212
RAB14	P61106	RAB14_HUMAN	Ras-related protein Rab-14 OS=Homo sapiens OX=9606 GN=RAB14 PE=1 SV=4	5.82	24125.1	2158	8	59.07	39.8833	57.5022	76.3026	141.822	54.2435	94.8851	40.0426	103.647	138.248	71.5001	81.8077
RAB15	P59190	RAB15_HUMAN	Ras-related protein Rab-15 OS=Homo sapiens OX=9606 GN=RAB15 PE=1 SV=1	5.4	24675.8	1378.53	5	32.55	91.0892	86.9209	96.7806	94.3398	54.3825	55.2112	82.1989	80.3014	54.7062	51.4654	74.7396
RAB1A	P62820	RAB1A_HUMAN	Ras-related protein Rab-1A OS=Homo sapiens OX=9606 GN=RAB1A PE=1 SV=3	5.86	22905.9	2508	2	16.1	32.6949	35.8954	41.6133	49.5507	31.4472	40.8317	44.5482	51.0061	41.3027	42.616	41.1506
RAB1B	Q9H0U4	RAB1B_HUMAN	Ras-related protein Rab-1B OS=Homo sapiens OX=9606 GN=RAB1B PE=1 SV=1	5.4	22342.3	2593.2	4	29.85	37.6958	37.3131	38.7395	42.2526	40.0035	40.8278	41.3725	47.391	49.6111	48.7018	42.3909
RAB2A	P61019	RAB2A_HUMAN	Ras-related protein Rab-2A OS=Homo sapiens OX=9606 GN=RAB2A PE=1 SV=1	6.11	23716.7	484.355	3	20.28	51.2695	44.6405	53.3539	62.2027	55.3342	55.307	48.2488	51.1302	59.5668	53.7189	53.4772
RAB35	Q15286	RAB35_HUMAN	Ras-related protein Rab-35 OS=Homo sapiens OX=9606 GN=RAB35 PE=1 SV=1	8.39	23310.4	1519.41	2	17.91	17.976	21.2884	23.2821	25.0159	27.4528	25.0549	16.9458	24.6376	20.6019	21.6284	22.3884
RAB39A	Q14964	RB39A_HUMAN	Ras-related protein Rab-39A OS=Homo sapiens OX=9606 GN=RAB39A PE=1 SV=2	7.59	25405.9	1114.63	2	9.22	62.4217	63.7358	88.3607	93.0779	220.885	222.659	187.13	233.453	85.7404	72.2661	132.973
RAB3B	P20337	RAB3B_HUMAN	Ras-related protein Rab-3B OS=Homo sapiens OX=9606 GN=RAB3B PE=1 SV=2	4.65	24986.1	1177.84	2	15.98	21.3758	17.4398	0	13.2844	0	0	37.2473	36.1902	55.7863	15.9158	19.724
RAB4A	P20338	RAB4A_HUMAN	Ras-related protein Rab-4A OS=Homo sapiens OX=9606 GN=RAB4A PE=1 SV=3	5.74	24674.8	1213.24	3	24.31	48.4339	95.523	58.143	113.969	58.9432	134.461	58.8287	118.817	76.755	143.345	90.7218
RAB4B	P61018	RAB4B_HUMAN	Ras-related protein Rab-4B OS=Homo sapiens OX=9606 GN=RAB4B PE=1 SV=1	5.72	23871.9	1258.63	3	18.78	23.0874	40.159	24.5396	46.9252	26.3709	55.086	25.4215	42.8842	30.103	59.6215	37.4198
RAB5A	P20339	RAB5A_HUMAN	Ras-related protein Rab-5A OS=Homo sapiens OX=9606 GN=RAB5A PE=1 SV=2	8.25	23886.8	942.482	4	21.86	18.1514	19.0027	14.3557	26.7342	20.8943	24.8794	19.9654	22.2093	20.3973	29.2063	21.5796
RAB5B	P61020	RAB5B_HUMAN	Ras-related protein Rab-5B OS=Homo sapiens OX=9606 GN=RAB5B PE=1 SV=1	8.24	23935	2607.93	7	48.37	34.3028	34.1213	40.0357	47.4328	59.0195	48.2146	48.8535	44.7173	53.1969	59.4441	46.9338
RAB5C	P51148	RAB5C_HUMAN	Ras-related protein Rab-5C OS=Homo sapiens OX=9606 GN=RAB5C PE=1 SV=2	8.58	23710.7	1470.21	7	42.59	30.4797	24.7836	50.444	45.3307	54.5225	61.9635	45.4818	49.0585	53.6511	62.9611	47.8676
RAB6A	P20340	RAB6A_HUMAN	Ras-related protein Rab-6A OS=Homo sapiens OX=9606 GN=RAB6A PE=1 SV=3	5.23	23706.9	1381.51	4	21.63	24.1075	21.8545	22.863	28.001	18.1503	22.9089	27.198	26.705	18.2034	24.8788	23.487
RAB6B	Q9NRW1	RAB6B_HUMAN	Ras-related protein Rab-6B OS=Homo sapiens OX=9606 GN=RAB6B PE=1 SV=1	5.22	23575.8	1227.97	4	22.12	80.9529	66.2663	141.582	87.0138	114.354	210.844	95.7568	104.853	91.3287	126.879	111.983
RAB7A	P51149	RAB7A_HUMAN	Ras-related protein Rab-7a OS=Homo sapiens OX=9606 GN=RAB7A PE=1 SV=1	6.57	23774.9	1805.55	9	59.9	44.3778	49.7125	63.9858	66.1895	66.6611	60.2897	54.7585	48.3041	67.2433	63.129	58.4651
RAB8A	P61006	RAB8A_HUMAN	Ras-related protein Rab-8A OS=Homo sapiens OX=9606 GN=RAB8A PE=1 SV=1	9.55	23839.3	1403.97	4	25.12	20.8611	15.7513	20.8694	30.3556	19.7648	18.6489	19.1182	17.1357	26.1808	19.7612	20.8447
RAB8B	Q92930	RAB8B_HUMAN	Ras-related protein Rab-8B OS=Homo sapiens OX=9606 GN=RAB8B PE=1 SV=2	9.55	23755.2	1490.48	3	19.81	17.353	18.4997	24.7665	24.2329	27.7452	26.6132	17.4336	20.2141	32.9493	32.241	24.2049
RALA	P11233	RALA_HUMAN	Ras-related protein Ral-A OS=Homo sapiens OX=9606 GN=RALA PE=1 SV=1	7	23737.9	2613.84	7	51.94	156.029	151.868	197.529	206.767	186.994	181.483	174.475	183.165	197.572	180.145	181.603
RAP1A	P62834	RAP1A_HUMAN	Ras-related protein Rap-1A OS=Homo sapiens OX=9606 GN=RAP1A PE=1 SV=1	6.53	21329.4	5342.94	9	64.13	118.694	116.415	137.25	144.77	145.996	128.716	134.191	150.704	144.356	140.698	136.179
RAP1B	P61224	RAP1B_HUMAN	Ras-related protein Rap-1b OS=Homo sapiens OX=9606 GN=RAP1B PE=1 SV=1	5.46	21052.9	4421.52	8	52.72	47.9683	43.7557	60.0596	60.3452	64.4157	56.6464	57.6286	63.1474	58.6756	58.3646	57.1007
RAP2A	P10114	RAP2A_HUMAN	Ras-related protein Rap-2a OS=Homo sapiens OX=9606 GN=RAP2A PE=1 SV=1	4.53	20843.6	1181.34	5	38.25	45.7436	40.5698	19.4657	57.7929	28.1851	23.5442	38.6097	45.3983	34.8567	22.7601	35.6926
RTN4	Q9NQC3	RTN4_HUMAN	Reticulon-4 OS=Homo sapiens OX=9606 GN=RTN4 PE=1 SV=2	4.22	130331	1159.67	26	46.9	1262.2	1195.64	1325.26	1329.41	958.237	861.795	1024.83	1132.56	757.78	818.892	1066.66
RHOB	P62745	RHOB_HUMAN	Rho-related GTP-binding protein RhoB OS=Homo sapiens OX=9606 GN=RHOB PE=1 SV=1	4.92	22579.6	8368.62	9	65.82	175.235	164.638	238.993	229.578	237.71	226.125	191.939	202.402	250.197	210.649	212.747
RHOG	P84095	RHOG_HUMAN	Rho-related GTP-binding protein RhoG OS=Homo sapiens OX=9606 GN=RHOG PE=1 SV=1	8.08	21764.7	7701.99	12	73.3	98.2045	103.913	149.884	177.456	141.214	133.354	122.149	128.156	181.859	174.162	141.035
SBDS	Q9Y3A5	SBDS_HUMAN	Ribosome maturation protein SBDS OS=Homo sapiens OX=9606 GN=SBDS PE=1 SV=4	9.15	29048.7	793.781	2	13.2	20.0405	14.2719	52.0964	32.4923	35.8214	33.2184	40.7017	42.2893	16.1604	23.3641	31.0456
SEPTIN10	Q9P0V9	SEP10_HUMAN	Septin-10 OS=Homo sapiens OX=9606 GN=SEPTIN10 PE=1 SV=2	6.38	53049.3	942.697	13	47.58	126.245	125.754	110.376	123.446	112.684	101.729	82.9923	83.1949	75.2762	90.0699	103.177
SEPTIN11	Q9NVA2	SEP11_HUMAN	Septin-11 OS=Homo sapiens OX=9606 GN=SEPTIN11 PE=1 SV=3	6.4	49683.5	1502.53	14	38.93	19306.7	23105.9	22203.9	28478.6	21050.6	23111	19882.3	20055.8	19237.9	18511.4	21494.4
SEPTIN14	Q6ZU15	SEP14_HUMAN	Septin-14 OS=Homo sapiens OX=9606 GN=SEPTIN14 PE=1 SV=2	5.84	50481.2	897.109	3	10.88	158.141	320.523	200.039	217.37	133.216	171.409	210.969	450.043	165.667	242.093	226.947
SEPTIN2	Q15019	SEPT2_HUMAN	Septin-2 OS=Homo sapiens OX=9606 GN=SEPTIN2 PE=1 SV=1	6.17	41715.7	10461.7	18	78.67	792.974	779.892	548.861	592.891	558.053	599.123	549.932	587.683	689.936	463.916	616.326
SEPTIN4	O43236	SEPT4_HUMAN	Septin-4 OS=Homo sapiens OX=9606 GN=SEPTIN4 PE=1 SV=1	5.72	55554.5	3904.38	15	49.58	448.25	460.286	698.446	739.661	612.486	629.725	545.86	549.345	480.026	493.223	565.731
SEPTIN5	Q99719	SEPT5_HUMAN	Septin-5 OS=Homo sapiens OX=9606 GN=SEPTIN5 PE=1 SV=1	6.24	43233.3	790.5	2	9.49	4.62497	22.1042	33.8058	22.2472	57.4237	39.7202	41.7252	10.9588	80.8773	61.6713	37.5159
SEPTIN7	Q16181	SEPT7_HUMAN	Septin-7 OS=Homo sapiens OX=9606 GN=SEPTIN7 PE=1 SV=2	8.97	50965.2	8839.23	17	52.17	1353.05	1254.29	1205.02	1327.24	1192.75	1001.77	1116.59	1147.88	959.659	947.422	1150.57
SEPTIN8	Q92599	SEPT8_HUMAN	Septin-8 OS=Homo sapiens OX=9606 GN=SEPTIN8 PE=1 SV=4	5.87	56269.6	7876.3	18	50.93	1544.6	1410.52	1398.26	1380.49	1342.21	1252.13	1101.76	1256.15	897.635	989.732	1257.35
SEPTIN9	Q9UHD8	SEPT9_HUMAN	Septin-9 OS=Homo sapiens OX=9606 GN=SEPTIN9 PE=1 SV=2	9.46	65686.7	1258.07	13	28.67	329.058	324.832	210.736	224.876	218.868	214.009	253.885	264.245	207.482	204.316	245.231
TF	P02787	TRFE_HUMAN	Serotransferrin OS=Homo sapiens OX=9606 GN=TF PE=1 SV=3	6.78	79345.1	611.532	9	26.93	178.911	191.599	135.084	185.856	139.07	148.628	196.355	247.176	171.572	158.266	175.252
SVIP	Q8NHG7	SVIP_HUMAN	Small VCP/p97-interacting protein OS=Homo sapiens OX=9606 GN=SVIP PE=1 SV=1	9.51	8556.74	3179.72	2	32.47	67.1055	50.9635	52.0307	48.6856	69.8448	56.2374	53.2048	45.4078	88.3382	62.6854	59.4504
ATP1A1	P05023	AT1A1_HUMAN	Sodium/potassium-transporting ATPase subunit alpha-1 OS=Homo sapiens OX=9606 GN=ATP1A1 PE=1 SV=1	5.17	114208	10397.5	42	49.36	2847.67	2790.65	2420.15	2692.89	2844.85	2652.3	2439.24	2504.77	2202.02	1941.21	2533.58
ATP1A2	P50993	AT1A2_HUMAN	Sodium/potassium-transporting ATPase subunit alpha-2 OS=Homo sapiens OX=9606 GN=ATP1A2 PE=1 SV=1	5.33	113577	6958.62	20	29.71	173.418	175.549	169.793	177.088	187.893	185.974	183.739	194.211	172.42	162.74	178.282
ATP1A3	P13637	AT1A3_HUMAN	Sodium/potassium-transporting ATPase subunit alpha-3 OS=Homo sapiens OX=9606 GN=ATP1A3 PE=1 SV=3	5.06	113174	12029.9	45	53.5	3010.87	2959.85	2671.21	3065.69	3239.64	3295.86	3118.7	3575.38	3101.34	2884.31	3092.29
ATP1A4	Q13733	AT1A4_HUMAN	Sodium/potassium-transporting ATPase subunit alpha-4 OS=Homo sapiens OX=9606 GN=ATP1A4 PE=1 SV=3	6.23	115193	3602.55	15	19.24	433.591	400.829	683.234	393.225	614.729	536.992	422.399	444.219	1024.9	388.886	534.3
ATP1B1	P05026	AT1B1_HUMAN	Sodium/potassium-transporting ATPase subunit beta-1 OS=Homo sapiens OX=9606 GN=ATP1B1 PE=1 SV=1	8.68	35460.5	20571.2	15	48.84	1484.21	1450.63	1448.68	1491.42	1769.56	1695.9	1488.69	1489.53	1612.92	1341.63	1527.32
SLC12A2	P55011	S12A2_HUMAN	Solute carrier family 12 member 2 OS=Homo sapiens OX=9606 GN=SLC12A2 PE=1 SV=1	5.98	132132	486.003	5	7.84	229.674	203.322	315.232	315.923	294.459	270.676	157.568	182.398	348.932	303.549	262.173
SORD	Q00796	DHSO_HUMAN	Sorbitol dehydrogenase OS=Homo sapiens OX=9606 GN=SORD PE=1 SV=4	7.91	38951.9	1341.99	7	40.06	72.0791	70.1069	125.936	146.786	145.155	122.179	46.3694	54.159	52.4311	55.4948	89.0697
SPTAN1	Q13813	SPTN1_HUMAN	Spectrin alpha chain_ non-erythrocytic 1 OS=Homo sapiens OX=9606 GN=SPTAN1 PE=1 SV=3	5.06	285338	1082.38	84	55.42	1875.32	1830.95	1956.84	1912.37	1633.42	1698.89	2085.29	2023.18	1268.71	1371.08	1765.6
SPTBN1	Q01082	SPTB2_HUMAN	Spectrin beta chain_ non-erythrocytic 1 OS=Homo sapiens OX=9606 GN=SPTBN1 PE=1 SV=2	5.26	275408	1418.99	86	53.81	1867.7	3270.38	1850.2	2049.68	1426.02	1511.31	1882.79	2081.74	1168.89	1506.19	1861.49
ALDH5A1	P51649	SSDH_HUMAN	Succinate-semialdehyde dehydrogenase_ mitochondrial OS=Homo sapiens OX=9606 GN=ALDH5A1 PE=1 SV=2	8.24	58070.2	752.992	2	10.28	98.6824	103.089	69.6993	142.648	162.114	181.45	157.802	176.287	71.2447	136.59	129.961
SOD2	P04179	SODM_HUMAN	Superoxide dismutase [Mn]_ mitochondrial OS=Homo sapiens OX=9606 GN=SOD2 PE=1 SV=3	8.41	24921.3	1350.65	3	16.67	54.0914	56.7947	39.0153	66.4009	46.9722	47.7423	75.155	80.0381	53.7931	54.8098	57.4813
VAT1	Q99536	VAT1_HUMAN	Synaptic vesicle membrane protein VAT-1 homolog OS=Homo sapiens OX=9606 GN=VAT1 PE=1 SV=2	5.88	42148.5	1493.42	8	33.33	148.574	140.293	101.927	104.611	129.723	120.954	125.815	127.376	136.014	151.97	128.726
STX1A	Q16623	STX1A_HUMAN	Syntaxin-1A OS=Homo sapiens OX=9606 GN=STX1A PE=1 SV=1	4.96	33194.6	820.104	7	36.46	56.7397	57.7395	90.611	113.917	88.7502	94.9945	72.167	90.2515	91.3738	88.885	84.543
STX1B	P61266	STX1B_HUMAN	Syntaxin-1B OS=Homo sapiens OX=9606 GN=STX1B PE=1 SV=1	5.09	33472.9	2048.2	8	47.22	147.138	144.981	151.537	163.334	163.332	153.554	137.704	149.422	185.492	168.925	156.542
STXBP1	P61764	STXB1_HUMAN	Syntaxin-binding protein 1 OS=Homo sapiens OX=9606 GN=STXBP1 PE=1 SV=1	6.54	67968	7027.61	32	69.53	995.357	928.347	926.209	964.769	1224.46	1100.79	945.841	1048.63	866.65	1126.01	1012.71
TNR	Q92752	TENR_HUMAN	Tenascin-R OS=Homo sapiens OX=9606 GN=TNR PE=1 SV=3	4.52	151900	499.133	11	15.83	496.11	310.648	296.009	354.161	573.061	434.802	524.724	596.323	721.524	693.444	500.081
TSPAN8	P19075	TSN8_HUMAN	Tetraspanin-8 OS=Homo sapiens OX=9606 GN=TSPAN8 PE=1 SV=1	5.32	26728.2	3580.16	3	21.52	264.122	267.145	122.602	151.112	292.376	272.949	246.422	270.004	283.276	380.756	255.076
PRDX3	P30048	PRDX3_HUMAN	Thioredoxin-dependent peroxide reductase_ mitochondrial OS=Homo sapiens OX=9606 GN=PRDX3 PE=1 SV=3	7.7	28034.8	2481.76	7	42.19	116.011	110.427	111.258	102.828	74.0316	73.7611	122.531	125.986	90.3305	79.3722	100.654
THY1	P04216	THY1_HUMAN	Thy-1 membrane glycoprotein OS=Homo sapiens OX=9606 GN=THY1 PE=1 SV=2	8.94	18162.9	10943.2	4	40.37	329.898	315.46	530.234	592.355	523.35	508.403	441.74	482.065	461.255	438.865	462.362
PURA	Q00577	PURA_HUMAN	Transcriptional activator protein Pur-alpha OS=Homo sapiens OX=9606 GN=PURA PE=1 SV=2	6.05	35024.9	899.472	2	17.08	25.7307	39.1763	35.7399	30.9048	25.7814	15.2991	30.2282	29.9013	28.0454	23.9664	28.4774
RHOA	P61586	RHOA_HUMAN	Transforming protein RhoA OS=Homo sapiens OX=9606 GN=RHOA PE=1 SV=1	5.75	22110.3	10551	7	59.07	136.223	120.754	194.579	196.869	185.167	171.594	169.612	175.759	175.019	161.621	168.72
VCP	P55072	TERA_HUMAN	Transitional endoplasmic reticulum ATPase OS=Homo sapiens OX=9606 GN=VCP PE=1 SV=4	4.96	90006.3	876.197	17	41.44	191.12	228.67	264.944	235.238	219.349	208.519	204.845	219.739	228.83	206.514	220.777
TKT	P29401	TKT_HUMAN	Transketolase OS=Homo sapiens OX=9606 GN=TKT PE=1 SV=3	7.49	68562.1	8620.31	28	68.38	1234.92	1140.01	1563.71	1652.14	2167.35	1985.39	1146.85	1194.26	1678.06	1467.52	1523.02
HADHA	P40939	ECHA_HUMAN	Trifunctional enzyme subunit alpha_ mitochondrial OS=Homo sapiens OX=9606 GN=HADHA PE=1 SV=2	9.49	83741.2	450.661	5	11.93	120.695	117.351	230.124	208.64	98.5281	91.4136	228.631	243.719	107.414	75.6213	152.214
TPI1	P60174	TPIS_HUMAN	Triosephosphate isomerase OS=Homo sapiens OX=9606 GN=TPI1 PE=1 SV=3	5.56	31076.2	645.635	3	16.43	54.5253	56.7467	54.6881	49.1745	59.5194	54.3214	55.2301	60.2676	56.9015	69.3536	57.0728
TUBAL3	A6NHL2	TBAL3_HUMAN	Tubulin alpha chain-like 3 OS=Homo sapiens OX=9606 GN=TUBAL3 PE=1 SV=2	5.65	50707.2	3615.52	4	10.31	228.912	239.774	169.384	192.698	85.8015	91.5633	189.923	212.715	74.5687	84.3538	156.969
TUBA4A	P68366	TBA4A_HUMAN	Tubulin alpha-4A chain OS=Homo sapiens OX=9606 GN=TUBA4A PE=1 SV=1	4.75	50665.8	52052	23	87.95	10843.6	11093	7646.7	7990.53	4012.34	4121.58	8320.05	9416.72	3495.38	3368.17	7030.81
TUBA8	Q9NY65	TBA8_HUMAN	Tubulin alpha-8 chain OS=Homo sapiens OX=9606 GN=TUBA8 PE=1 SV=1	4.76	50778	33491.6	15	48.55	226.362	236.575	187.916	200.771	92.5012	100.324	195.193	216.409	83.097	82.196	162.134
TUBB	P07437	TBB5_HUMAN	Tubulin beta chain OS=Homo sapiens OX=9606 GN=TUBB PE=1 SV=2	4.59	50127.2	80391.6	23	71.4	5576.26	5243.34	3206.78	3985.12	2206.97	2187.23	4869.28	4880.24	1763.32	1868.78	3578.73
TUBB1	Q9H4B7	TBB1_HUMAN	Tubulin beta-1 chain OS=Homo sapiens OX=9606 GN=TUBB1 PE=1 SV=1	4.89	50897.3	3279.37	8	23.73	63.2892	67.3834	53.8005	43.3996	36.025	36.837	56.0071	63.9372	20.3033	35.532	47.6514
TUBB2A	Q13885	TBB2A_HUMAN	Tubulin beta-2A chain OS=Homo sapiens OX=9606 GN=TUBB2A PE=1 SV=1	4.59	50306.3	68753.1	24	74.61	8459.07	8123.85	4380.4	5367.9	3134.66	3096.53	6897.96	7288.59	2637.55	2822.98	5220.95
TUBB2B	Q9BVA1	TBB2B_HUMAN	Tubulin beta-2B chain OS=Homo sapiens OX=9606 GN=TUBB2B PE=1 SV=1	4.59	50409.4	67815.7	24	74.61	2186.62	2102.35	1130.32	1410.18	809.352	799.908	1806.63	1884.62	678.441	736.743	1354.52
TUBB3	Q13509	TBB3_HUMAN	Tubulin beta-3 chain OS=Homo sapiens OX=9606 GN=TUBB3 PE=1 SV=2	4.64	50889	43649	22	74.67	2854.69	2730.07	1382.77	1587.29	891.671	903.132	2016.77	2097.38	806.058	785.841	1605.57
TUBB4A	P04350	TBB4A_HUMAN	Tubulin beta-4A chain OS=Homo sapiens OX=9606 GN=TUBB4A PE=1 SV=2	4.59	50042.1	82757.2	23	71.62	14956.8	14025.4	13827	15107.6	8109.44	7984.6	14625	14696.7	7060.75	7183.09	11757.6
TUBB6	Q9BUF5	TBB6_HUMAN	Tubulin beta-6 chain OS=Homo sapiens OX=9606 GN=TUBB6 PE=1 SV=1	4.58	50313.5	18776.1	15	47.31	152.568	170.641	91.7528	74.819	74.7691	64.805	97.7379	85.8391	90.6643	53.9549	95.7552
TPPP3	Q9BW30	TPPP3_HUMAN	Tubulin polymerization-promoting protein family member 3 OS=Homo sapiens OX=9606 GN=TPPP3 PE=1 SV=1	9.69	19156.6	6411.68	7	57.95	82.2037	77.9809	244.323	157.751	195.254	117.756	105.541	98.9655	125.182	73.6337	127.859
TPPP	O94811	TPPP_HUMAN	Tubulin polymerization-promoting protein OS=Homo sapiens OX=9606 GN=TPPP PE=1 SV=1	10.11	23864.8	10531.5	10	51.6	225.949	238.845	556.94	514.257	437.291	390.374	484.615	459.301	439.655	415.263	416.249
SIRPA	P78324	SHPS1_HUMAN	Tyrosine-protein phosphatase non-receptor type substrate 1 OS=Homo sapiens OX=9606 GN=SIRPA PE=1 SV=2	6.58	55480.2	1148.99	13	43.45	195.848	168.321	276.108	273.199	303.004	274.16	259.93	251.386	194.352	214.288	241.06
USP5	P45974	UBP5_HUMAN	Ubiquitin carboxyl-terminal hydrolase 5 OS=Homo sapiens OX=9606 GN=USP5 PE=1 SV=2	4.72	96698.9	802.253	18	32.52	380.245	358.384	296.388	349.611	202.367	195.333	375.373	352.449	154.776	141.813	280.674
RPS27A	P62979	RS27A_HUMAN	Ubiquitin-40S ribosomal protein S27a OS=Homo sapiens OX=9606 GN=RPS27A PE=1 SV=2	10.24	18307.1	15540.5	8	51.28	311.579	335.435	549.864	505.609	437.534	411.465	287.511	297.102	669.484	619.74	442.532
MYO1D	O94832	MYO1D_HUMAN	Unconventional myosin-Id OS=Homo sapiens OX=9606 GN=MYO1D PE=1 SV=2	9.85	117001	1170.09	35	45.83	1025.67	980.427	1371.56	1209.78	1112.44	1034.45	905.074	867.302	1513.85	1114.62	1113.52
HSD17B12	Q53GQ0	DHB12_HUMAN	Very-long-chain 3-oxoacyl-CoA reductase OS=Homo sapiens OX=9606 GN=HSD17B12 PE=1 SV=2	9.78	34438.3	626.92	3	14.1	46.6733	45.4986	51.8543	52.7146	42.9083	36.6387	55.8094	54.64	52.8972	40.9264	48.0561
NSF	P46459	NSF_HUMAN	Vesicle-fusing ATPase OS=Homo sapiens OX=9606 GN=NSF PE=1 SV=3	6.56	83107.8	2632.91	32	53.9	728.284	672.161	644.116	667.075	600.856	479.529	691.987	686.975	502.774	530.188	620.395
VIM	P08670	VIME_HUMAN	Vimentin OS=Homo sapiens OX=9606 GN=VIM PE=1 SV=4	4.86	53708.8	3501.47	24	64.81	5553.67	4846.14	5611.68	4932.77	6091.93	4788.87	4477.41	3970.45	4213.85	3674.59	4816.14
VSNL1	P62760	VISL1_HUMAN	Visinin-like protein 1 OS=Homo sapiens OX=9606 GN=VSNL1 PE=1 SV=2	4.82	22313.5	2457.43	10	63.35	138.951	126.11	95.1449	103.3	102.075	95.3298	102.834	110.003	97.1751	91.5239	106.245
VDAC1	P21796	VDAC1_HUMAN	Voltage-dependent anion-selective channel protein 1 OS=Homo sapiens OX=9606 GN=VDAC1 PE=1 SV=2	8.92	30886.7	1916.55	11	67.49	203.268	196.229	251.535	238.786	144.067	131.69	238.62	229.649	139.124	112.438	188.541
VDAC2	P45880	VDAC2_HUMAN	Voltage-dependent anion-selective channel protein 2 OS=Homo sapiens OX=9606 GN=VDAC2 PE=1 SV=2	7.48	32079.8	2059.3	12	61.22	125.42	132.649	176.245	156.961	112.857	97.7931	168.45	161.718	99.4691	89.9092	132.147
VDAC3	Q9Y277	VDAC3_HUMAN	Voltage-dependent anion-selective channel protein 3 OS=Homo sapiens OX=9606 GN=VDAC3 PE=1 SV=1	8.87	31000.9	746.642	7	35.34	60.1652	63.1015	76.1029	76.1824	58.501	49.3071	76.8722	76.0855	48.2094	45.7738	63.0301
KCNAB2	Q13303	KCAB2_HUMAN	Voltage-gated potassium channel subunit beta-2 OS=Homo sapiens OX=9606 GN=KCNAB2 PE=1 SV=2	9.31	41285.4	1186.51	4	22.07	125.591	122.651	71.3407	118.342	97.2784	97.408	94.4963	109.91	62.2328	101.33	100.058
ATP6V1A	P38606	VATA_HUMAN	V-type proton ATPase catalytic subunit A OS=Homo sapiens OX=9606 GN=ATP6V1A PE=1 SV=2	5.19	68703.4	1841.9	18	45.06	335.949	326.681	146.926	143.042	158.308	143.433	347.864	356.269	184.531	146.426	228.943
ATP6V1B2	P21281	VATB2_HUMAN	V-type proton ATPase subunit B_ brain isoform OS=Homo sapiens OX=9606 GN=ATP6V1B2 PE=1 SV=3	5.46	56843	1032.11	13	38.16	268.006	273.892	111.868	105.532	110.527	108.691	260.855	277.032	119.724	114.656	175.078

## Sheet: 2_Myelin UDMSe (835)
gene name	accession	entry	description	IEP	mw	max score	reported peptides	sequence coverage	Control_M 1	Control_M 2	Control_M 3	Control_M 4	Control_M 5	Control_M 6	Control_M 7	Control_M 8	Control_M 9	Control_M 10	AVERAGE Control_M
HSPE1	P61604	CH10_HUMAN	10 kDa heat shock protein_ mitochondrial OS=Homo sapiens OX=9606 GN=HSPE1 PE=1 SV=2	9.55	10931.7	776.563	2	16.67	16.3926	14.5438	15.6409	16.9409			18.32	12.3788			15.7028
YWHAB	P31946	1433B_HUMAN	14-3-3 protein beta/alpha OS=Homo sapiens OX=9606 GN=YWHAB PE=1 SV=3	4.57	28196.5	5970.66	12	64.23	675.318	668.02	343.383	279.694	226.977	241.201	374.623	390.694	285.914	332.21	381.803
YWHAE	P62258	1433E_HUMAN	14-3-3 protein epsilon OS=Homo sapiens OX=9606 GN=YWHAE PE=1 SV=1	4.44	29345	11004.7	17	80	1229.73	1204.27	861.15	862.302	564.77	486.89	818.895	795.994	685.342	732.025	824.137
YWHAH	Q04917	1433F_HUMAN	14-3-3 protein eta OS=Homo sapiens OX=9606 GN=YWHAH PE=1 SV=4	4.56	28389.9	4155.12	10	58.94	290.58	314.438	181.362	161.822	181.092	79.5828	204.12	205.696	244.872	240.516	210.408
YWHAG	P61981	1433G_HUMAN	14-3-3 protein gamma OS=Homo sapiens OX=9606 GN=YWHAG PE=1 SV=2	4.61	28473.7	12806.7	13	64.37	1466.43	1444.97	730.043	765.938	585.892	575.204	1047.3	860.358	593.242	613.625	868.3
YWHAQ	P27348	1433T_HUMAN	14-3-3 protein theta OS=Homo sapiens OX=9606 GN=YWHAQ PE=1 SV=1	4.48	28049.4	6715.15	12	53.88	486.884	455.929	544.54	524.576	276.418	237.247	487.564	449.179	412.836	435.62	431.079
YWHAZ	P63104	1433Z_HUMAN	14-3-3 protein zeta/delta OS=Homo sapiens OX=9606 GN=YWHAZ PE=1 SV=1	4.53	27916.2	12677.6	17	73.47	1226.81	1148.42	757.275	687.5	396.117	383.259	687.334	782.936	589.192	583.939	724.279
PLCB1	Q9NQ66	PLCB1_HUMAN	1-phosphatidylinositol 4_5-bisphosphate phosphodiesterase beta-1 OS=Homo sapiens OX=9606 GN=PLCB1 PE=1 SV=1	5.85	139423	733.102	3	4.11	160.68	141.913	144.614	152.028	164.873	160.244	176.573	145.804	212.088	205.583	166.44
PLCD1	P51178	PLCD1_HUMAN	1-phosphatidylinositol 4_5-bisphosphate phosphodiesterase delta-1 OS=Homo sapiens OX=9606 GN=PLCD1 PE=1 SV=2	6.26	86406.5	526.011	9	22.49	1838.94	1687.06	1631.67	1337.08	461.205	486.83	570.148	402.92	438.135	226.703	908.069
CNP	P09543	CN37_HUMAN	2'_3'-cyclic-nucleotide 3'-phosphodiesterase OS=Homo sapiens OX=9606 GN=CNP PE=1 SV=2	9.49	47977.9	31498.8	34	79.1	16180	14014.4	15312.2	14681.6	13240.3	16202.8	13035.8	15102.1	17587.7	13949.6	14930.6
PSMC6	P62333	PRS10_HUMAN	26S proteasome regulatory subunit 10B OS=Homo sapiens OX=9606 GN=PSMC6 PE=1 SV=1	7.29	44458.2	311.332	4	15.94	94.6802	93.1241	94.2919	81.3983	63.6346	62.4971	86.8569	80.7872			82.1588
PSMC3	P17980	PRS6A_HUMAN	26S proteasome regulatory subunit 6A OS=Homo sapiens OX=9606 GN=PSMC3 PE=1 SV=3	4.94	49488.8	401.783	6	25.97	100.229	97.5065	85.3374	90.8922	49.955	60.8196	88.5888	85.6958		52.5862	79.0678
RIDA	P52758	RIDA_HUMAN	2-iminobutanoate/2-iminopropanoate deaminase OS=Homo sapiens OX=9606 GN=RIDA PE=1 SV=1	9.13	14550.7	4755.49	5	58.39	63.5768	68.5173	103.367	124.263	161.908	173.552	153.641	152.882	136.675	116.21	125.459
OGDH	Q02218	ODO1_HUMAN	2-oxoglutarate dehydrogenase_ mitochondrial OS=Homo sapiens OX=9606 GN=OGDH PE=1 SV=3	6.43	117133	461.335	15	23.75	362.332	354.611	368.6	327.245	239.059	230.383	390.124	381.501	234.724	241.894	313.047
OGDHL	Q9ULD0	OGDHL_HUMAN	2-oxoglutarate dehydrogenase-like_ mitochondrial OS=Homo sapiens OX=9606 GN=OGDHL PE=1 SV=3	6.21	115337	218.697	6	6.83	151.371	143.39	115.608	127.124	79.3651	82.5262	154.418	158.207	82.3679	72.0067	116.638
HSD17B10	Q99714	HCD2_HUMAN	3-hydroxyacyl-CoA dehydrogenase type-2 OS=Homo sapiens OX=9606 GN=HSD17B10 PE=1 SV=3	7.83	27151.2	613.656	6	42.91	46.5904	47.4823	60.9259	57.2964	39.2892	36.6137	50.1792	51.7553	34.2263	47.7901	47.2149
ACAA2	P42765	THIM_HUMAN	3-ketoacyl-CoA thiolase_ mitochondrial OS=Homo sapiens OX=9606 GN=ACAA2 PE=1 SV=2	8.08	42380.4	322.938	2	7.81	40.116	36.8612	82.5127	66.9018	47.1954	45.0047					53.0986
RPS20	P60866	RS20_HUMAN	40S ribosomal protein S20 OS=Homo sapiens OX=9606 GN=RPS20 PE=1 SV=1	10.71	13486.8	450.927	2	26.05	38.5277	67.298	63.0492	87.1362	42.7437	58.2404	67.987	100.901	48.4321	49.5813	62.3897
RPS3	P23396	RS3_HUMAN	40S ribosomal protein S3 OS=Homo sapiens OX=9606 GN=RPS3 PE=1 SV=2	10.24	26859.4	509.641	2	9.05	46.4591	35.8224	48.3438	31.4383			50.3905	27.5019			39.9927
ABAT	P80404	GABT_HUMAN	4-aminobutyrate aminotransferase_ mitochondrial OS=Homo sapiens OX=9606 GN=ABAT PE=1 SV=3	7.87	57123.4	432.075	5	15.4	164.786	177.594	103.87	122.167	73.6837	61.4185	121.116	161.336	70.5342		117.39
SLC3A2	P08195	4F2_HUMAN	4F2 cell-surface antigen heavy chain OS=Homo sapiens OX=9606 GN=SLC3A2 PE=1 SV=3	4.7	68222.2	692.22	13	34.44	281.416	362.593	359.426	342.253	417.82	390.358	486.53	474.638	443.65	362.539	392.122
ALDH9A1	P49189	AL9A1_HUMAN	4-trimethylaminobutyraldehyde dehydrogenase OS=Homo sapiens OX=9606 GN=ALDH9A1 PE=1 SV=3	5.57	54714.5	365.751	4	10.93	76.2478	104.266	132.748	121.559	51.8919	92.6736	107.881	124.336	106.829	128.714	104.715
HSPD1	P10809	CH60_HUMAN	60 kDa heat shock protein_ mitochondrial OS=Homo sapiens OX=9606 GN=HSPD1 PE=1 SV=2	5.56	61225.9	3874.2	23	58.99	846.498	767.541	981.185	1062.4	504.285	497.437	1120.56	1069.58	544.628	573.176	796.729
RPLP0	P05388	RLA0_HUMAN	60S acidic ribosomal protein P0 OS=Homo sapiens OX=9606 GN=RPLP0 PE=1 SV=1	5.62	34444.7	700.337	4	22.71	72.7511	76.978	104.684	86.1846	77.9623	69.4628	69.172	67.5352	102.471	58.496	78.5696
RPL12	P30050	RL12_HUMAN	60S ribosomal protein L12 OS=Homo sapiens OX=9606 GN=RPL12 PE=1 SV=1	10.11	17989.7	835.341	6	56.36	37.5839	35.7243	41.9412	38.6094	25.0722	22.476	45.2784	34.2868	28.8137	24.3896	33.4176
RPL13	P26373	RL13_HUMAN	60S ribosomal protein L13 OS=Homo sapiens OX=9606 GN=RPL13 PE=1 SV=4	12.16	24318.5	646.93	2	11.37	55.4427	57.4453	67.5481	71.0894	50.6175	53.0819	60.3498	55.3414	49.0002	37.2213	55.7138
RPL30	P62888	RL30_HUMAN	60S ribosomal protein L30 OS=Homo sapiens OX=9606 GN=RPL30 PE=1 SV=2	10.12	12955.2	1344.17	3	40.87	26.858	35.712	36.9101	34.6888	17.6912	17.9488	27.9428	24.3856	33.5843	28.4409	28.4163
RPL4	P36578	RL4_HUMAN	60S ribosomal protein L4 OS=Homo sapiens OX=9606 GN=RPL4 PE=1 SV=5	11.69	47982.5	298.98	5	15.93	65.7084	106.696	61.5566	131.639	61.0565	88.2499	74.1438	112.216	115.978	56.3634	87.3608
ACAT1	P24752	THIL_HUMAN	Acetyl-CoA acetyltransferase_ mitochondrial OS=Homo sapiens OX=9606 GN=ACAT1 PE=1 SV=1	9.21	45484.8	622.028	6	20.14	105.563	116.885	186.601	150.308	110.002	108.638	167.384	171.65	102.568	108.195	132.779
ASAH1	Q13510	ASAH1_HUMAN	Acid ceramidase OS=Homo sapiens OX=9606 GN=ASAH1 PE=1 SV=5	7.53	45115.9	2889.47	9	25.06	879.937	782.815	894.267	826.695	577.425	615.694	308.882	252.667	496.6	402.482	603.746
ACO2	Q99798	ACON_HUMAN	Aconitate hydratase_ mitochondrial OS=Homo sapiens OX=9606 GN=ACO2 PE=1 SV=2	7.35	86166.9	4881.32	32	59.49	2725.83	2937.1	2575.64	2406.77	2087.69	2101.43	2914.98	3068.07	2116.42	2075.11	2500.91
ACTR10	Q9NZ32	ARP10_HUMAN	Actin-related protein 10 OS=Homo sapiens OX=9606 GN=ACTR10 PE=1 SV=1	7.14	46877.3	345.082	3	12.47	134.42	143.196	86.0925	79.7004	69.4557	66.3552	125.146	90.4067	86.9607	100.164	98.1897
ACTR2	P61160	ARP2_HUMAN	Actin-related protein 2 OS=Homo sapiens OX=9606 GN=ACTR2 PE=1 SV=1	6.33	45046	623.388	4	16.24	198.655	175.786	150.483	134.889	119.827	140.957	180.899	139.853	165.327	144.906	155.158
ARPC1A	Q92747	ARC1A_HUMAN	Actin-related protein 2/3 complex subunit 1A OS=Homo sapiens OX=9606 GN=ARPC1A PE=2 SV=2	8.14	42139.6	443.562	3	8.11	135.835	127.172	107.263	105.987	83.0477	102.161	113.55	123.576	107.048	96.0917	110.173
ARPC3	O15145	ARPC3_HUMAN	Actin-related protein 2/3 complex subunit 3 OS=Homo sapiens OX=9606 GN=ARPC3 PE=1 SV=3	8.83	20774.8	736.65	2	13.48	61.8937	52.7035	31.7047	42.3854	50.8297	46.4251	77.1896	45.5618	76.7488	47.3317	53.2774
ARPC4	P59998	ARPC4_HUMAN	Actin-related protein 2/3 complex subunit 4 OS=Homo sapiens OX=9606 GN=ARPC4 PE=1 SV=3	8.78	19781.1	618.249	6	39.29	106.178	98.7304	81.3829	81.5195	72.1745	66.8137	85.7873	67.3273	81.5379	91.9801	83.3432
ARPC5	O15511	ARPC5_HUMAN	Actin-related protein 2/3 complex subunit 5 OS=Homo sapiens OX=9606 GN=ARPC5 PE=1 SV=3	5.31	16377.5	751.515	3	29.14	32.8951	37.4049	29.0839	34.1643	25.8877	26.4869	24.3005	25.81	25.3769	32.2456	29.3656
ACTR3	P61158	ARP3_HUMAN	Actin-related protein 3 OS=Homo sapiens OX=9606 GN=ACTR3 PE=1 SV=3	5.53	47827.5	1569.64	13	41.63	336.496	286.47	301.793	310.656	281.243	244.83	328.199	308.887	213.007	223.252	283.483
ACOT13	Q9NPJ3	ACO13_HUMAN	Acyl-coenzyme A thioesterase 13 OS=Homo sapiens OX=9606 GN=ACOT13 PE=1 SV=1	9.77	15074.6	742.844	2	17.86	103.89	87.5491	87.6984	93.144	81.9893	94.5127	91.6714	90.1704	99.5572	58.1848	88.8368
AK1	P00568	KAD1_HUMAN	Adenylate kinase isoenzyme 1 OS=Homo sapiens OX=9606 GN=AK1 PE=1 SV=3	9.04	21748.9	975.91	5	39.18	80.494	86.201	93.4188	86.1804	64.9884	57.2483	80.5022	81.1781	44.0037	36.219	71.0434
AK5	Q9Y6K8	KAD5_HUMAN	Adenylate kinase isoenzyme 5 OS=Homo sapiens OX=9606 GN=AK5 PE=1 SV=2	4.77	63903.4	653.477	6	14.23	97.0581	88.0514	234.342	198.711	156.909	168.491	154.806	174.174	142.276	113.773	152.859
CAP1	Q01518	CAP1_HUMAN	Adenylyl cyclase-associated protein 1 OS=Homo sapiens OX=9606 GN=CAP1 PE=1 SV=5	8.07	52357.8	1471.14	16	39.37	487.554	491.92	372.671	373.454	249.017	232.494	484.262	460.382	253.135	257.882	366.277
CAP2	P40123	CAP2_HUMAN	Adenylyl cyclase-associated protein 2 OS=Homo sapiens OX=9606 GN=CAP2 PE=1 SV=1	5.96	53109.2	1117.2	12	37.32	587.672	685.068	571.998	683.966	189.246	116.499	738.353	739.589		85.2251	488.624
APMAP	Q9HDC9	APMAP_HUMAN	Adipocyte plasma membrane-associated protein OS=Homo sapiens OX=9606 GN=APMAP PE=1 SV=2	5.77	46651.5	478.762	6	14.66	94.2937	105.34	138.184	142.381	108.136	100.416	117.405	119.865	91.0282	91.3332	110.838
SLC25A4	P12235	ADT1_HUMAN	ADP/ATP translocase 1 OS=Homo sapiens OX=9606 GN=SLC25A4 PE=1 SV=4	10.25	33292.7	7225.93	15	52.01	644.893	596.727	731.761	677.813	441.703	385.252	769.486	678.748	454.947	461.892	584.322
SLC25A5	P05141	ADT2_HUMAN	ADP/ATP translocase 2 OS=Homo sapiens OX=9606 GN=SLC25A5 PE=1 SV=7	10.16	33080.4	4403.45	14	41.95	487.875	438.563	500.857	477.143	378.74	365.102	586.928	507.597	341.037	365.584	444.943
SLC25A6	P12236	ADT3_HUMAN	ADP/ATP translocase 3 OS=Homo sapiens OX=9606 GN=SLC25A6 PE=1 SV=4	10.24	33094.4	7077.58	16	53.02	374.559	360.058	454.271	393.406	281.39	329.184	427.583	433.204	316.001	324.385	369.404
ARF4	P18085	ARF4_HUMAN	ADP-ribosylation factor 4 OS=Homo sapiens OX=9606 GN=ARF4 PE=1 SV=3	7.05	20624.9	8532.27	11	68.89	222.111	180.656	270.835	274.745	262.211	232.323	259.443	242.579	240.611	297.91	248.342
ARF5	P84085	ARF5_HUMAN	ADP-ribosylation factor 5 OS=Homo sapiens OX=9606 GN=ARF5 PE=1 SV=2	6.39	20643.8	7769.74	11	68.33	51.7196	40.0973	54.1328	53.0096	45.6849	43.6293	63.1541	63.2403	43.1482	50.8335	50.865
ARF6	P62330	ARF6_HUMAN	ADP-ribosylation factor 6 OS=Homo sapiens OX=9606 GN=ARF6 PE=1 SV=2	9.35	20196.3	2288.89	6	49.14	78.9086	78.2843	72.9541	72.3348	91.4033	71.8941	61.2977	55.8205	93.9102	39.1932	71.6001
ARL1	P40616	ARL1_HUMAN	ADP-ribosylation factor-like protein 1 OS=Homo sapiens OX=9606 GN=ARL1 PE=1 SV=1	5.45	20531.6	632.467	2	13.81	35.9042	33.5316	50.8313	49.4347	66.6488	44.8961	44.4849	34.8744	70.3885	48.4903	47.9485
ARL8A	Q96BM9	ARL8A_HUMAN	ADP-ribosylation factor-like protein 8A OS=Homo sapiens OX=9606 GN=ARL8A PE=1 SV=1	7.83	21644.1	2383.65	6	43.55	81.7041	80.1276	111.875	113.006	78.7808	69.2318	102.667	96.8908	65.8316	65.2807	86.5396
ARL8B	Q9NVJ2	ARL8B_HUMAN	ADP-ribosylation factor-like protein 8B OS=Homo sapiens OX=9606 GN=ARL8B PE=1 SV=1	8.6	21767.2	3031.48	7	59.14	215.303	208.297	284.734	294.14	196.235	175.983	241.386	241.332	172.658	167.152	219.722
AKR7A2	O43488	ARK72_HUMAN	Aflatoxin B1 aldehyde reductase member 2 OS=Homo sapiens OX=9606 GN=AKR7A2 PE=1 SV=3	6.78	40045.3	373.301	2	9.47	141.158	127.312	82.469	93.5407	83.431	103.257	100.258	108.942	89.4908	91.8184	102.168
AARS	P49588	SYAC_HUMAN	Alanine--tRNA ligase_ cytoplasmic OS=Homo sapiens OX=9606 GN=AARS PE=1 SV=2	5.19	107552	1423.65	24	36.88	5460.86	5785.9	6054.61	4784.52	4989.71	6804.52	5628.55	3593.94	4999.7	8159.77	5626.21
ALDH2	P05091	ALDH2_HUMAN	Aldehyde dehydrogenase_ mitochondrial OS=Homo sapiens OX=9606 GN=ALDH2 PE=1 SV=2	6.7	56894.6	654.728	9	25.53	1373.98	1255.07	2154.8	1950.52	2228.69	2493.02	1685.09	1937.64	3670.1	3469.75	2221.87
ACTN1	P12814	ACTN1_HUMAN	Alpha-actinin-1 OS=Homo sapiens OX=9606 GN=ACTN1 PE=1 SV=2	5.11	103628	1041.34	13	18.83	263.336	272.839	349.195	347.922	233.685	256.596	248.822	296.026	287.373	312.023	286.782
ACTN2	P35609	ACTN2_HUMAN	Alpha-actinin-2 OS=Homo sapiens OX=9606 GN=ACTN2 PE=1 SV=1	5.16	104424	551.889	9	11.41	954.051	920.88	407.621	1335.95	835.927	935.234	1008.23	341.455	1082.41	349.208	817.097
ACTN4	O43707	ACTN4_HUMAN	Alpha-actinin-4 OS=Homo sapiens OX=9606 GN=ACTN4 PE=1 SV=2	5.13	105310	1699.1	32	54.01	1081.33	1033.75	1272.77	1285.94	784.92	828.728	944.837	1031.04	955.582	887.225	1010.61
ADD1	P35611	ADDA_HUMAN	Alpha-adducin OS=Homo sapiens OX=9606 GN=ADD1 PE=1 SV=2	5.5	81354.5	772.754	13	28.09	647.346	950.605	655.492	596.42	722.501	883.606	827.39	948.152	276.412	873.975	738.19
ALDH7A1	P49419	AL7A1_HUMAN	Alpha-aminoadipic semialdehyde dehydrogenase OS=Homo sapiens OX=9606 GN=ALDH7A1 PE=1 SV=5	7.94	59057.5	8912.7	24	61.97	1477.47	1395.86	2295.95	2073.35	3189.77	3394.71	3081.33	3230.36	2346.79	2483.98	2496.96
ACTR1A	P61163	ACTZ_HUMAN	Alpha-centractin OS=Homo sapiens OX=9606 GN=ACTR1A PE=1 SV=1	6.22	42727.9	3447.49	12	46.81	1006.77	794.668	627.527	602.305	365.48	365.485	667.844	705.331	489.652	524.375	614.944
CRYAB	P02511	CRYAB_HUMAN	Alpha-crystallin B chain OS=Homo sapiens OX=9606 GN=CRYAB PE=1 SV=2	6.96	20158.9	19942.7	10	70.86	2984.99	3130.28	3880.19	3886.4	3255.83	3611.5	3675	3758.36	3588.91	3338.34	3510.98
ENO1	P06733	ENOA_HUMAN	Alpha-enolase OS=Homo sapiens OX=9606 GN=ENO1 PE=1 SV=2	7.19	47511.2	44526.7	28	78.11	6679.95	5698.31	6035.64	6181.6	9736.53	8701.09	8647.1	8011.76	7603.02	7551.54	7484.65
INA	Q16352	AINX_HUMAN	Alpha-internexin OS=Homo sapiens OX=9606 GN=INA PE=1 SV=2	5.17	55561.8	19031.3	34	72.95	6532.92	7339.53	5532.69	5416.9	6461.88	4348.2	5915.08	5992.81	3279.83	7071.23	5789.11
NAPA	P54920	SNAA_HUMAN	Alpha-soluble NSF attachment protein OS=Homo sapiens OX=9606 GN=NAPA PE=1 SV=3	5.07	33689	2187.71	18	89.15	377.889	315.197	310.611	278.284	230.722	249.904	305.085	293.156	227.813	270.701	285.936
MAOB	P27338	AOFB_HUMAN	Amine oxidase [flavin-containing] B OS=Homo sapiens OX=9606 GN=MAOB PE=1 SV=3	7.27	59276.3	2852.99	20	52.69	575.957	581.026	1076.32	1171.2	421.943	425.351	861.369	845.158	299.186	316.571	657.409
ANLN	Q9NQW6	ANLN_HUMAN	Anillin OS=Homo sapiens OX=9606 GN=ANLN PE=1 SV=2	8.01	125568	3114.07	31	39.32	5500.94	5146.48	4053.22	4878.5	3731.92	3432.71	4554.69	4031.81	2303.3	2452.03	4008.56
ANK2	Q01484	ANK2_HUMAN	Ankyrin-2 OS=Homo sapiens OX=9606 GN=ANK2 PE=1 SV=4	4.85	436224	361.07	8	3.21	1747.89	1914.56	1975.74	1981.82	1301.3	1457.64	1768.63	1716.95	1077.37	1048.2	1599.01
ANK3	Q12955	ANK3_HUMAN	Ankyrin-3 OS=Homo sapiens OX=9606 GN=ANK3 PE=1 SV=3	6.07	482692	250.824	16	5.51	1451.67	1305.17	2624.59	2528.24	1599.53	1637.52	2148.48	2135.57	1517.56	1640.44	1858.88
ANXA1	P04083	ANXA1_HUMAN	Annexin A1 OS=Homo sapiens OX=9606 GN=ANXA1 PE=1 SV=2	6.67	38942.4	4197.5	12	50.58	40.2958	39.84	401.851	200.778	461.015	389.667	137.634	115.681		45.2279	203.555
ANXA11	P50995	ANX11_HUMAN	Annexin A11 OS=Homo sapiens OX=9606 GN=ANXA11 PE=1 SV=1	7.62	54732	405.295	5	13.47	840.552	814.988	255.16	228.362	201.201	199.746	558.327	502.701	136.181	149.14	388.636
ANXA2	P07355	ANXA2_HUMAN	Annexin A2 OS=Homo sapiens OX=9606 GN=ANXA2 PE=1 SV=2	7.8	38832.2	2663.98	15	55.16	540.721	414.451	816.942	685.69	910.571	678.743	575.044	480.904	985.705	607.644	669.641
ANXA5	P08758	ANXA5_HUMAN	Annexin A5 OS=Homo sapiens OX=9606 GN=ANXA5 PE=1 SV=2	4.73	35993.9	2051.82	14	54.69	209.656	262.211	299.865	280.801	158.432	171.293	270.94	279.076	348.76	304.105	258.514
ANXA6	P08133	ANXA6_HUMAN	Annexin A6 OS=Homo sapiens OX=9606 GN=ANXA6 PE=1 SV=3	5.27	76215.6	9461.33	46	75.19	4362.57	4029.36	742.386	718.589	2613.01	2317.84	2401.64	2236.53	3344.64	3044.03	2581.06
AP1B1	Q10567	AP1B1_HUMAN	AP-1 complex subunit beta-1 OS=Homo sapiens OX=9606 GN=AP1B1 PE=1 SV=2	4.75	105549	369.984	13	15.91	161.77	170.085	160.712	150.48	201.632	105.949	169.536	179.594	149.719	147.242	159.672
AP2A1	O95782	AP2A1_HUMAN	AP-2 complex subunit alpha-1 OS=Homo sapiens OX=9606 GN=AP2A1 PE=1 SV=3	6.66	108630	1370.32	33	47.08	1056.74	1070.21	865.49	736.504	718.048	712.476	1072.35	876.3	683.139	795.736	858.699
AP2A2	O94973	AP2A2_HUMAN	AP-2 complex subunit alpha-2 OS=Homo sapiens OX=9606 GN=AP2A2 PE=1 SV=2	7	104873	1164.3	25	38.66	741.904	779.209	660.962	577.042	566.23	562.861	808.752	664.415	549.823	613.168	652.437
AP2B1	P63010	AP2B1_HUMAN	AP-2 complex subunit beta OS=Homo sapiens OX=9606 GN=AP2B1 PE=1 SV=1	5.06	105465	804.225	27	39.59	553.458	567.818	630.601	576.634	636.564	531.126	568.111	620.001	572.154	620.964	587.743
AP2M1	Q96CW1	AP2M1_HUMAN	AP-2 complex subunit mu OS=Homo sapiens OX=9606 GN=AP2M1 PE=1 SV=2	10.07	49996.9	885.529	13	40.23	447.098	449.789	352.486	392.803	468.446	406.323	457.34	435.887	524.253	447.908	438.233
AP2S1	P53680	AP2S1_HUMAN	AP-2 complex subunit sigma OS=Homo sapiens OX=9606 GN=AP2S1 PE=1 SV=2	5.78	17188.8	812.37	2	15.49	126.269	64.7236	72.2817	73.5753	68.2114	63.6614	73.0643	77.3701	123.911	125.264	86.8332
APOD	P05090	APOD_HUMAN	Apolipoprotein D OS=Homo sapiens OX=9606 GN=APOD PE=1 SV=1	4.87	21560.7	2190.45	4	27.51	441.66	396.203	485.14	539.671	380.395	390.208	469.907	459.468	274.812	306.047	414.351
AQP4	P55087	AQP4_HUMAN	Aquaporin-4 OS=Homo sapiens OX=9606 GN=AQP4 PE=1 SV=2	7.56	35286	847.33	5	21.67	79.3621	82.063	317.074	309.501	239.609	212.459	221.201	191.474	129.564	132.8	191.511
ADAP1	O75689	ADAP1_HUMAN	Arf-GAP with dual PH domain-containing protein 1 OS=Homo sapiens OX=9606 GN=ADAP1 PE=1 SV=2	9.29	43737.5	441.387	9	33.16	152.203	154.158	285.893	229.099	335.685	333.354	159.921	135.625	450.206	469.464	270.561
ASS1	P00966	ASSY_HUMAN	Argininosuccinate synthase OS=Homo sapiens OX=9606 GN=ASS1 PE=1 SV=2	8.07	46815.6	2992.59	13	43.45	103.071	106.655	236.5	225.89	645.692	658.438	112.293	114.982	111.338	86.7412	240.16
GOT1	P17174	AATC_HUMAN	Aspartate aminotransferase_ cytoplasmic OS=Homo sapiens OX=9606 GN=GOT1 PE=1 SV=3	6.6	46475.7	818.491	6	19.61	139.146	160.818	125.06	127.021	121.114	130.279	190.436	158.398	278.872	182.548	161.369
GOT2	P00505	AATM_HUMAN	Aspartate aminotransferase_ mitochondrial OS=Homo sapiens OX=9606 GN=GOT2 PE=1 SV=3	9.36	47916.9	6736.06	19	58.6	1934.31	1700.47	1775.78	1940.26	1859.08	2000.03	1926.91	1923.5	2224.62	2359.6	1964.46
ATL1	Q8WXF7	ATLA1_HUMAN	Atlastin-1 OS=Homo sapiens OX=9606 GN=ATL1 PE=1 SV=1	5.78	63885.8	1148.09	15	38.89	370.759	379.325	419.293	459.722	298.715	317.176	471.551	464.722	228.479	278.934	368.868
ATP5PB	P24539	AT5F1_HUMAN	ATP synthase F(0) complex subunit B1_ mitochondrial OS=Homo sapiens OX=9606 GN=ATP5PB PE=1 SV=2	9.78	28965.7	1463.17	10	54.3	514.764	469.883	475.555	438.338	396.465	411.79	556.874	537.19	281.353	346.388	442.86
ATP5MD	Q96IX5	ATPMD_HUMAN	ATP synthase membrane subunit DAPIT_ mitochondrial OS=Homo sapiens OX=9606 GN=ATP5MD PE=1 SV=1	10.2	6514.61	2904.22	2	43.1	47.1502	40.3537	46.9738	49.9009	31.6799	29.6577	19.6426	17.3194	24.7234	24.9221	33.2324
ATP5F1A	P25705	ATPA_HUMAN	ATP synthase subunit alpha_ mitochondrial OS=Homo sapiens OX=9606 GN=ATP5F1A PE=1 SV=1	9.55	59864.8	12062.1	24	59.49	4503.26	4846.24	5244.93	5135.48	3340.22	3910.08	5109.63	5613.01	3132.6	2969.12	4380.46
ATP5F1B	P06576	ATPB_HUMAN	ATP synthase subunit beta_ mitochondrial OS=Homo sapiens OX=9606 GN=ATP5F1B PE=1 SV=3	5.1	56560	13581.8	25	76.75	3771.97	3770.14	4452.16	4349.92	2609.98	2604.83	4143.4	4033.84	2395.61	2260.57	3439.24
ATP5PD	O75947	ATP5H_HUMAN	ATP synthase subunit d_ mitochondrial OS=Homo sapiens OX=9606 GN=ATP5PD PE=1 SV=3	5.02	18548.3	4805.71	8	67.7	237.648	250.12	268.629	278.827	210.205	195.627	305.8	305.166	175.274	188.882	241.618
ATP5F1D	P30049	ATPD_HUMAN	ATP synthase subunit delta_ mitochondrial OS=Homo sapiens OX=9606 GN=ATP5F1D PE=1 SV=2	5.2	17490	1662.06	2	13.69	66.236	56.4913	86.5021	102.064	33.7505	30.0608	75.6684	65.298	49.5196	38.9949	60.4586
ATP5ME	P56385	ATP5I_HUMAN	ATP synthase subunit e_ mitochondrial OS=Homo sapiens OX=9606 GN=ATP5ME PE=1 SV=2	9.84	7933.22	977.103	2	30.43	64.7375	52.2016	23.3672	73.3835	55.8986	53.1753	60.6861	52.3048	48.4435	40.927	52.5125
ATP5MF	P56134	ATPK_HUMAN	ATP synthase subunit f_ mitochondrial OS=Homo sapiens OX=9606 GN=ATP5MF PE=1 SV=3	10.07	11031.9	3491.77	2	25.53	144.303	131.418	165.708	169.109	149.364	140.077	186.267	174.232	123.805	112.411	149.669
ATP5F1C	P36542	ATPG_HUMAN	ATP synthase subunit gamma_ mitochondrial OS=Homo sapiens OX=9606 GN=ATP5F1C PE=1 SV=1	9.7	33053.1	2812.73	11	36.58	509.248	496.542	594.622	610.091	395.73	411.223	557.547	565.836	302.607	323.647	476.709
ATP5PO	P48047	ATPO_HUMAN	ATP synthase subunit O_ mitochondrial OS=Homo sapiens OX=9606 GN=ATP5PO PE=1 SV=1	10.6	23391.4	6460.44	9	57.75	426.166	392.292	455.147	444.801	319.08	303.361	456.656	444.66	266.848	259.108	376.812
ASNA1	O43681	ASNA_HUMAN	ATPase ASNA1 OS=Homo sapiens OX=9606 GN=ASNA1 PE=1 SV=2	4.62	39249.1	434.64	5	19.25	109.593	94.2344	117.537	101.895	74.8841	77.2625	154.947	157.066		51.0072	104.27
ACLY	P53396	ACLY_HUMAN	ATP-citrate synthase OS=Homo sapiens OX=9606 GN=ACLY PE=1 SV=3	6.98	121752	533.678	10	15.71	905.687	901.261	306.586	273.635	194.092	163.74	328.735	442.352	319.932	295.879	413.19
PFKL	P17858	PFKAL_HUMAN	ATP-dependent 6-phosphofructokinase_ liver type OS=Homo sapiens OX=9606 GN=PFKL PE=1 SV=6	7.25	85817	2114.27	23	46.79	1393.2	1311.47	1551.27	1593.52	1213.05	1320.78	1302.92	1284.68	1282.62	1347.44	1360.1
PFKM	P08237	PFKAM_HUMAN	ATP-dependent 6-phosphofructokinase_ muscle type OS=Homo sapiens OX=9606 GN=PFKM PE=1 SV=2	7.9	86038.1	1178.89	22	39.1	1269.71	1254.8	843.04	804.031	903.89	773.637	1189.75	1145.01	1039.33	1160.87	1038.41
PFKP	Q01813	PFKAP_HUMAN	ATP-dependent 6-phosphofructokinase_ platelet type OS=Homo sapiens OX=9606 GN=PFKP PE=1 SV=2	7.37	86508.7	4714.5	28	51.02	2334.84	2194.09	943.067	925.643	1165.23	1128.09	1980.43	1882.73	1118.15	1192.9	1486.52
DDX1	Q92499	DDX1_HUMAN	ATP-dependent RNA helicase DDX1 OS=Homo sapiens OX=9606 GN=DDX1 PE=1 SV=2	6.84	83401.7	479.994	11	25.81	277.546	307.562	196.844	232.155	188.089	214.52	233.356	271.221	284.826	343.047	254.917
EPB41L1	Q9H4G0	E41L1_HUMAN	Band 4.1-like protein 1 OS=Homo sapiens OX=9606 GN=EPB41L1 PE=1 SV=2	5.3	99073.3	1392.33	25	41.77	1017.92	1027.54	1055.31	1036.17	712.371	622.613	917.709	856.905	697.866	736.156	868.056
EPB41L2	O43491	E41L2_HUMAN	Band 4.1-like protein 2 OS=Homo sapiens OX=9606 GN=EPB41L2 PE=1 SV=1	5.18	113101	3707.87	36	44.68	6112.36	6159.8	4917.76	5107.37	6086.22	5505.32	4596.39	4736.87	4779.13	5188.56	5318.98
EPB41L3	Q9Y2J2	E41L3_HUMAN	Band 4.1-like protein 3 OS=Homo sapiens OX=9606 GN=EPB41L3 PE=1 SV=2	4.92	121533	4874.96	42	57.04	6080.93	5637.7	4057.1	4089.21	2939.65	2897.19	5297.06	5343.37	2441.79	2436.88	4122.09
BSG	P35613	BASI_HUMAN	Basigin OS=Homo sapiens OX=9606 GN=BSG PE=1 SV=2	5.3	42599.6	616.14	7	25.45	197.091	177.498	334.511	451.224	478.276	530.514	388.645	341.362	401.617	428.859	372.96
ACTBL2	Q562R1	ACTBL_HUMAN	Beta-actin-like protein 2 OS=Homo sapiens OX=9606 GN=ACTBL2 PE=1 SV=2	5.26	42345.5	2679.82	9	25.8	1024.57	927.854	874.18	1108.03	775.347	869.192	876.31	1139.59	1019.76	1022.35	963.717
ADD2	P35612	ADDB_HUMAN	Beta-adducin OS=Homo sapiens OX=9606 GN=ADD2 PE=1 SV=3	5.58	81310.6	217.049	2	3.03	225.669	191.058	146.24	138.141	84.7804	80.549	205.174	179.37	111.57	86.2974	144.885
ACTR1B	P42025	ACTY_HUMAN	Beta-centractin OS=Homo sapiens OX=9606 GN=ACTR1B PE=1 SV=1	5.99	42407.5	2023.82	12	56.91	281.767	256.322	136.32	121.119	179.807	144.391	195.71	178.542	118.712	145.7	175.839
ENO3	P13929	ENOB_HUMAN	Beta-enolase OS=Homo sapiens OX=9606 GN=ENO3 PE=1 SV=5	7.67	47329.1	12702.8	9	26.5	252.516	105.44	114.92	135.112	204.383	175.843	173.25	172.297	159.352	165.199	165.831
NAPB	Q9H115	SNAB_HUMAN	Beta-soluble NSF attachment protein OS=Homo sapiens OX=9606 GN=NAPB PE=1 SV=2	5.18	33899.2	3449.64	15	80.87	1248.69	1419.8	814.982	1283.21	1248.77	1475.02	918.712	1024.05	697.656	1044.59	1117.55
ATIC	P31939	PUR9_HUMAN	Bifunctional purine biosynthesis protein PURH OS=Homo sapiens OX=9606 GN=ATIC PE=1 SV=3	6.3	65129.2	342.233	4	12.16	148.011	181.364	141.689	93.6814	92.8604	100.68	116.622	165.057	211.271	185.885	143.712
BASP1	P80723	BASP1_HUMAN	Brain acid soluble protein 1 OS=Homo sapiens OX=9606 GN=BASP1 PE=1 SV=2	4.42	22693.4	1801.57	8	81.94	162.337	89.1089	215.661	165.015	223.145	225.051	230.495	128.678	262.154	279.366	198.101
BCAS1	O75363	BCAS1_HUMAN	Breast carcinoma-amplified sequence 1 OS=Homo sapiens OX=9606 GN=BCAS1 PE=1 SV=2	4.8	61994.1	1451.82	12	33.39	516.432	457.251	1191.1	1052.6	948.628	901.435	930.566	801.13	977.254	963.292	873.969
BROX	Q5VW32	BROX_HUMAN	BRO1 domain-containing protein BROX OS=Homo sapiens OX=9606 GN=BROX PE=1 SV=1	7.53	46989.4	401.224	2	6.57	119.94	92.2359	125.083	133.967	182.487	182.523	133.381	119.408	248.908	190.897	152.883
MTHFD1	P11586	C1TC_HUMAN	C-1-tetrahydrofolate synthase_ cytoplasmic OS=Homo sapiens OX=9606 GN=MTHFD1 PE=1 SV=3	6.94	102244	542.265	16	19.79	3610.91	3184.46	3233.25	3224.6	3650.89	3939.9	3282.76	3422.27	3455.73	3450.95	3445.57
CAMK1	Q14012	KCC1A_HUMAN	Calcium/calmodulin-dependent protein kinase type 1 OS=Homo sapiens OX=9606 GN=CAMK1 PE=1 SV=1	4.96	41907.4	357.723	3	9.46	40.0331	43.3956	41.9713	38.2353	35.2862	29.1965	29.605	37.4864			36.9012
CAMK1D	Q8IU85	KCC1D_HUMAN	Calcium/calmodulin-dependent protein kinase type 1D OS=Homo sapiens OX=9606 GN=CAMK1D PE=1 SV=1	6.87	43313.1	465.333	4	12.99	53.5796	51.3792	65.3876	63.968	46.3899	35.9855	58.0275	67.4262			55.2679
CAMK2A	Q9UQM7	KCC2A_HUMAN	Calcium/calmodulin-dependent protein kinase type II subunit alpha OS=Homo sapiens OX=9606 GN=CAMK2A PE=1 SV=2	6.66	54658.1	10767.9	22	57.95	2720.67	2588.89	3786.49	3901.91	3055.74	2983.95	3185.53	3027.76	2112.74	1869.75	2923.34
CAMK2B	Q13554	KCC2B_HUMAN	Calcium/calmodulin-dependent protein kinase type II subunit beta OS=Homo sapiens OX=9606 GN=CAMK2B PE=1 SV=3	6.91	73590.3	4456.41	19	43.39	1188.4	1140.76	1350.71	1402.4	1052.06	971.005	1372.34	1328.75	833.555	757.741	1139.77
CAMK2D	Q13557	KCC2D_HUMAN	Calcium/calmodulin-dependent protein kinase type II subunit delta OS=Homo sapiens OX=9606 GN=CAMK2D PE=1 SV=3	6.88	56996.8	3885.21	14	34.87	312.817	255.319	512.228	465.023	411.67	390.555	390.616	366.4	228.136	260.617	359.338
CAMK2G	Q13555	KCC2G_HUMAN	Calcium/calmodulin-dependent protein kinase type II subunit gamma OS=Homo sapiens OX=9606 GN=CAMK2G PE=1 SV=4	7.68	63348.6	3624.89	17	44.62	821.548	763.893	875.718	894.613	762.316	713.081	998.755	918.667	529.063	479.084	775.674
SLC25A12	O75746	CMC1_HUMAN	Calcium-binding mitochondrial carrier protein Aralar1 OS=Homo sapiens OX=9606 GN=SLC25A12 PE=1 SV=2	8.48	75161.2	1313.33	19	43.66	400.602	372.906	424.4	396.3	364.478	268.3	394.865	385.179	392.671	349.191	374.889
CACYBP	Q9HB71	CYBP_HUMAN	Calcyclin-binding protein OS=Homo sapiens OX=9606 GN=CACYBP PE=1 SV=2	8.63	26324	508.798	6	45.61	96.0992	105.978	74.3698	82.795	89.4425	86.5299	88.9735	109.917	75.032	104.837	91.3974
CANX	P27824	CALX_HUMAN	Calnexin OS=Homo sapiens OX=9606 GN=CANX PE=1 SV=2	4.27	68024.6	1317.31	13	30.24	1251.07	1196.65	1457.06	1621.93	882.285	876.417	1536.35	1536.7	808.513	803.95	1197.09
CAPNS1	P04632	CPNS1_HUMAN	Calpain small subunit 1 OS=Homo sapiens OX=9606 GN=CAPNS1 PE=1 SV=1	4.87	28486.9	721.263	3	14.55	214.896	211.626	341.395	209.716	342.076	353.575	147.73	97.3042	357.511	156.114	243.194
CAPN1	P07384	CAN1_HUMAN	Calpain-1 catalytic subunit OS=Homo sapiens OX=9606 GN=CAPN1 PE=1 SV=1	5.35	82517.5	298.615	3	4.9	230.987	239.8	122.098	115.609	135.697	113.38	145.911	135.342	116.456	106.814	146.209
CALR	P27797	CALR_HUMAN	Calreticulin OS=Homo sapiens OX=9606 GN=CALR PE=1 SV=1	4.09	48312.7	825.592	9	40.29	209.374	192.974	251.004	232.812	110.678	124.908	273.318	236.313	120.718	146.983	189.908
PRKACB	P22694	KAPCB_HUMAN	cAMP-dependent protein kinase catalytic subunit beta OS=Homo sapiens OX=9606 GN=PRKACB PE=1 SV=2	9.2	40736.8	402.739	4	19.66	141.684	157.659	198.937	180.501	90.4503	155.04	143.855	198.697	247.67	162.946	167.744
PRKAR1A	P10644	KAP0_HUMAN	cAMP-dependent protein kinase type I-alpha regulatory subunit OS=Homo sapiens OX=9606 GN=PRKAR1A PE=1 SV=1	5.09	43209.9	1032.26	15	51.18	223.872	217.434	337.085	326.554	1143.73	315.92	1084.19	989.896	1477.42	257.162	637.326
CA14	Q9ULX7	CAH14_HUMAN	Carbonic anhydrase 14 OS=Homo sapiens OX=9606 GN=CA14 PE=1 SV=1	5.93	37895.8	395.023	3	10.68	86.3049	88.9387	138.299	141.815	136.978	129.542	92.923	94.5975	227.158	216.263	135.282
CA2	P00918	CAH2_HUMAN	Carbonic anhydrase 2 OS=Homo sapiens OX=9606 GN=CA2 PE=1 SV=2	7.06	29303.1	14109.8	13	71.54	1567.44	1534.38	2638.2	2406.11	2520.39	2383.98	1956.3	1973.53	2979.61	3029.62	2298.96
CBR1	P16152	CBR1_HUMAN	Carbonyl reductase [NADPH] 1 OS=Homo sapiens OX=9606 GN=CBR1 PE=1 SV=3	8.42	30660.1	15098.6	14	67.87	1102.77	1052.97	1189.37	1189	884.903	961.128	1554.39	1460.92	1282.89	1467.38	1214.57
CBR3	O75828	CBR3_HUMAN	Carbonyl reductase [NADPH] 3 OS=Homo sapiens OX=9606 GN=CBR3 PE=1 SV=3	5.78	31249.5	7509.73	3	28.52	211.064	282.225	237.809	339.743	214.113	605.302	291.782	386.59	272.68	418.512	325.982
CPM	P14384	CBPM_HUMAN	Carboxypeptidase M OS=Homo sapiens OX=9606 GN=CPM PE=1 SV=2	7.04	50970.2	408.827	7	23.02	120.191	131.273	215.057	213.038	233.519	225.974	115.786	111.612	212.108	208.269	178.683
CARNS1	A5YM72	CRNS1_HUMAN	Carnosine synthase 1 OS=Homo sapiens OX=9606 GN=CARNS1 PE=1 SV=3	5.81	89967.3	773.666	13	27.93	528.236	485.257	388.614	357.691	325.123	297.16	260.782	305.995	648.68	619.823	421.736
CAT	P04040	CATA_HUMAN	Catalase OS=Homo sapiens OX=9606 GN=CAT PE=1 SV=3	7.01	59984.4	924.049	13	36.05	163.236	208.968	145.647	128.442	354.742	406.757	334.629	363.125	235.885	214.926	255.636
COMT	P21964	COMT_HUMAN	Catechol O-methyltransferase OS=Homo sapiens OX=9606 GN=COMT PE=1 SV=2	5.13	30493.3	2446.78	9	61.25	167.979	203.86	252.831	256.65	148.982	144.283	200.786	224.112	126.887	164.27	189.064
CTNNB1	P35222	CTNB1_HUMAN	Catenin beta-1 OS=Homo sapiens OX=9606 GN=CTNNB1 PE=1 SV=1	5.47	86124.1	531.455	12	24.2	193.354	230.989	335.172	295.232	344.489	323.478	210.644	232.993	242.876	281.224	269.045
CTSD	P07339	CATD_HUMAN	Cathepsin D OS=Homo sapiens OX=9606 GN=CTSD PE=1 SV=1	6.12	45065.5	3236.46	12	40.05	2947.4	2884.22	3472.95	3287.22	3400.2	485.62	3159.6	3118.66	641.556	407.778	2380.52
CNRIP1	Q96F85	CNRP1_HUMAN	CB1 cannabinoid receptor-interacting protein 1 OS=Homo sapiens OX=9606 GN=CNRIP1 PE=1 SV=1	8.17	18762.4	1280.13	4	45.12	42.2594	44.1875	54.1942	50.1503	87.0745	72.7942	37.9638		101.313	101.107	65.6715
ALCAM	Q13740	CD166_HUMAN	CD166 antigen OS=Homo sapiens OX=9606 GN=ALCAM PE=1 SV=2	5.87	65786.7	802.886	13	39.11	163.663	172.465	415.314	394.181	411.939	389.619	288.857	296.314	439.333	483.194	345.488
CD59	P13987	CD59_HUMAN	CD59 glycoprotein OS=Homo sapiens OX=9606 GN=CD59 PE=1 SV=1	6.07	14804.6	3550.09	5	52.34	183.111	170.436	175.303	277.099	223.023	223.076	221.281	217.942	241.966	248.74	218.198
CD81	P60033	CD81_HUMAN	CD81 antigen OS=Homo sapiens OX=9606 GN=CD81 PE=1 SV=1	4.92	26493.8	11158.7	5	30.93	2926.88	3154.14	3045	3679.81	3953.18	4105.38	3344.71	3355.7	4641.32	3382.05	3558.82
CD82	P27701	CD82_HUMAN	CD82 antigen OS=Homo sapiens OX=9606 GN=CD82 PE=1 SV=1	4.97	30252.9	1426.35	2	18.73	79.5212	81.9342	273.244	238.325	235.938	265.156	194.574	129.881	441.514	478.223	241.831
CD9	P21926	CD9_HUMAN	CD9 antigen OS=Homo sapiens OX=9606 GN=CD9 PE=1 SV=4	6.92	25986.4	16733.2	10	33.33	2521.25	2454.83	1749.26	2069.77	3760.87	3573.84	3134.54	3280.81	3993.98	3299.85	2983.9
CDC42EP1	Q00587	BORG5_HUMAN	Cdc42 effector protein 1 OS=Homo sapiens OX=9606 GN=CDC42EP1 PE=1 SV=1	6.74	40408.9	1235.53	13	57.29	279.235	229.019	399.457	371.406	291.12	272.501	320.476	264.661	307.057	278.291	301.322
CISD1	Q9NZ45	CISD1_HUMAN	CDGSH iron-sulfur domain-containing protein 1 OS=Homo sapiens OX=9606 GN=CISD1 PE=1 SV=1	9.53	12370.2	1076.06	3	38.89	54.8531	73.1279	108.415	98.5363	73.4206	77.0853	134.395	125.479	116.303	65.0235	92.6638
CADM2	Q8N3J6	CADM2_HUMAN	Cell adhesion molecule 2 OS=Homo sapiens OX=9606 GN=CADM2 PE=2 SV=1	5	48010.2	3046.65	11	42.07	377.931	385.313	574.246	533.36	928.903	873.19	500.816	546.754	544.567	592.233	585.731
CADM3	Q8N126	CADM3_HUMAN	Cell adhesion molecule 3 OS=Homo sapiens OX=9606 GN=CADM3 PE=1 SV=1	5.68	43756.2	4728.32	13	55.28	1034.78	973.712	1192.64	1118.76	1167.52	1185.19	906.232	844.321	924.537	917.155	1026.48
CADM4	Q8NFZ8	CADM4_HUMAN	Cell adhesion molecule 4 OS=Homo sapiens OX=9606 GN=CADM4 PE=1 SV=1	5.9	43241.6	4580.59	12	46.13	661.37	636.778	767.281	842.079	1023.32	1131.17	816.761	780.596	1307.8	1372.63	933.978
CEND1	Q8N111	CEND_HUMAN	Cell cycle exit and neuronal differentiation protein 1 OS=Homo sapiens OX=9606 GN=CEND1 PE=1 SV=1	9.98	15011	2309.92	4	28.19	327.696	316.306	309.079	329.189	239.113	229.318	365.958	368.966	194.609	169.587	284.982
CDC42	P60953	CDC42_HUMAN	Cell division control protein 42 homolog OS=Homo sapiens OX=9606 GN=CDC42 PE=1 SV=2	6.18	21600.8	12046.1	8	48.17	723.351	647.182	774.562	1006.22	1119.25	1004.24	854.298	872.359	889.397	1119.54	901.039
CHMP4B	Q9H444	CHM4B_HUMAN	Charged multivesicular body protein 4b OS=Homo sapiens OX=9606 GN=CHMP4B PE=1 SV=1	4.57	24950.2	977.781	2	13.39	126.503	97.9603	196.513	207.242	150.321	143.469	144.071	117.667	209.401	189.735	158.288
CHMP6	Q96FZ7	CHMP6_HUMAN	Charged multivesicular body protein 6 OS=Homo sapiens OX=9606 GN=CHMP6 PE=1 SV=3	5.09	23541.9	1343.83	5	34.83	103.935	63.3285	105.04	107.898	123.842	126.802	118.231	73.8647	78.804	54.7102	95.6455
CLIC4	Q9Y696	CLIC4_HUMAN	Chloride intracellular channel protein 4 OS=Homo sapiens OX=9606 GN=CLIC4 PE=1 SV=4	5.3	29000.3	3414.45	11	73.91	220.865	216.571	488.945	446.487	191.725	178.634	282.758	294.92	322.986	319.343	296.324
SLC44A1	Q8WWI5	CTL1_HUMAN	Choline transporter-like protein 1 OS=Homo sapiens OX=9606 GN=SLC44A1 PE=1 SV=1	8.56	74842	6408.67	21	38.2	2801.71	2852.23	4086.61	4102.14	4524.84	4451.63	3635.18	3564.95	4801.18	5264.14	4008.46
SLC44A2	Q8IWA5	CTL2_HUMAN	Choline transporter-like protein 2 OS=Homo sapiens OX=9606 GN=SLC44A2 PE=1 SV=3	8.53	81663.5	654.203	13	23.37	366.46	364.496	732.572	698.534	834.833	803.801	522.523	477.177	709.952	701.045	621.139
CFAP74	Q9C0B2	CFA74_HUMAN	Cilia- and flagella-associated protein 74 OS=Homo sapiens OX=9606 GN=CFAP74 PE=2 SV=3	6	179958	304.986	2	1.26	5025.19	4618.09	4426.43	3806.44	5292.42	4803.44	4006.47	2928.09	6302.09	4467.72	4567.64
CS	O75390	CISY_HUMAN	Citrate synthase_ mitochondrial OS=Homo sapiens OX=9606 GN=CS PE=1 SV=2	8.47	51940.7	1658.19	11	40.34	665.54	573.494	592.705	567.801	247.801	263.169	604.13	624.616	316.81	357.975	481.404
CMTM5	Q96DZ9	CKLF5_HUMAN	CKLF-like MARVEL transmembrane domain-containing protein 5 OS=Homo sapiens OX=9606 GN=CMTM5 PE=1 SV=2	6.19	24880.7	2662.76	4	21.97	254.576	244.906	457.623	1015.46	829.497	373.512	289.986	375.109	1020.7	302.575	516.394
SNAP91	O60641	AP180_HUMAN	Clathrin coat assembly protein AP180 OS=Homo sapiens OX=9606 GN=SNAP91 PE=1 SV=2	4.5	92730.5	342.348	3	3.86	211.559	206.363	250.881	184.976	217.535	202.776	227.411	216.577	271.023	252.734	224.183
CLTC	Q00610	CLH1_HUMAN	Clathrin heavy chain 1 OS=Homo sapiens OX=9606 GN=CLTC PE=1 SV=5	5.36	193383	3833.29	74	58.51	5996.22	5546.27	4986.8	5419.58	6630.37	6902.91	6345.85	5146.17	6901.38	6807.09	6068.27
CLTCL1	P53675	CLH2_HUMAN	Clathrin heavy chain 2 OS=Homo sapiens OX=9606 GN=CLTCL1 PE=1 SV=2	5.49	189140	1497.06	25	20.85	1038.29	1428.77	1044.99	973.312	613.226	638.258	905.717	1087.43	837.575	857.57	942.515
CLDND1	Q9NY35	CLDN1_HUMAN	Claudin domain-containing protein 1 OS=Homo sapiens OX=9606 GN=CLDND1 PE=1 SV=1	5.45	29287.5	649.445	3	24.51	73.9348	75.7968	98.1019	95.2497	94.3058	79.827	102.486	109.047	131.648	119.396	97.9792
CLDN11	O75508	CLD11_HUMAN	Claudin-11 OS=Homo sapiens OX=9606 GN=CLDN11 PE=1 SV=2	7.8	22734.6	12525.9	4	32.37	991.06	1170.85	3263.74	2525.15	2085.13	1605.45	2195.65	3360.85	3082.64	2286.17	2256.67
CLASP2	O75122	CLAP2_HUMAN	CLIP-associating protein 2 OS=Homo sapiens OX=9606 GN=CLASP2 PE=1 SV=3	8.46	141862	257.311	9	9.89	451.663	432.416	500.653	521.575	427.648	385.41	544.838	445.028	439.434	536.414	468.508
CLU	P10909	CLUS_HUMAN	Clusterin OS=Homo sapiens OX=9606 GN=CLU PE=1 SV=1	5.87	53065	607.167	7	23.16	133.445	133.716	233.711	160.2	109.05	120.861	193.926	161.485	84.1019	67.8496	139.834
CFL1	P23528	COF1_HUMAN	Cofilin-1 OS=Homo sapiens OX=9606 GN=CFL1 PE=1 SV=3	8.23	18730.6	28397	11	69.28	1282.16	1180.93	1105.76	1041.33	1031.2	1107.38	905.011	1117.97	1779.4	1912.81	1246.39
CFL2	Q9Y281	COF2_HUMAN	Cofilin-2 OS=Homo sapiens OX=9606 GN=CFL2 PE=1 SV=1	8.16	18850.7	22324.5	11	77.11	322.782	307.661	362.632	340.051	268.212	276.582	263.301	259.164	820.638	728.738	394.976
C3	P01024	CO3_HUMAN	Complement C3 OS=Homo sapiens OX=9606 GN=C3 PE=1 SV=2	5.99	188688	1128.64	28	23.27	279.867	354.064	301.591	313.584	531.58	544.537	1579.02	1579.97	312.089	315.114	611.142
CNTN1	Q12860	CNTN1_HUMAN	Contactin-1 OS=Homo sapiens OX=9606 GN=CNTN1 PE=1 SV=1	5.53	114176	4807.8	36	52.55	4379.79	2865.69	6796.4	7024.41	5516.82	8231.39	5291.37	7290.88	8818.84	8208.61	6442.42
CNTN2	Q02246	CNTN2_HUMAN	Contactin-2 OS=Homo sapiens OX=9606 GN=CNTN2 PE=1 SV=1	7.87	114078	1615.74	25	35.19	574.122	647.35	812.786	925.425	1044.48	1065.69	749.176	650.791	1013.66	1791.46	927.493
CNTNAP1	P78357	CNTP1_HUMAN	Contactin-associated protein 1 OS=Homo sapiens OX=9606 GN=CNTNAP1 PE=1 SV=1	6.63	158320	3491.95	40	40.46	2847.48	2788.45	3820.37	3858.26	5094.94	5235.04	4457.76	4108.49	4594.4	4750.91	4155.61
CNTNAP2	Q9UHC6	CNTP2_HUMAN	Contactin-associated protein-like 2 OS=Homo sapiens OX=9606 GN=CNTNAP2 PE=1 SV=1	6.14	150277	553.531	26	32.53	826.293	715.381	912.584	900.08	1007.87	1069.01	829.734	683.4	1062.3	960.283	896.693
CPNE2	Q96FN4	CPNE2_HUMAN	Copine-2 OS=Homo sapiens OX=9606 GN=CPNE2 PE=1 SV=3	5.66	61874.3	209.877	2	4.38	140.238	145.527	171.738	155.695	187.837	187.941	239.994	197.775	349.34	260.023	203.611
CKB	P12277	KCRB_HUMAN	Creatine kinase B-type OS=Homo sapiens OX=9606 GN=CKB PE=1 SV=1	5.23	42929.5	28812.3	20	80.58	7510.28	7917.31	4620.8	4460.4	2531.52	2263.46	7096.96	6280.66	2618.82	2499.98	4780.02
CKMT1A	P12532	KCRU_HUMAN	Creatine kinase U-type_ mitochondrial OS=Homo sapiens OX=9606 GN=CKMT1A PE=1 SV=1	8.37	47436	4740.21	17	57.07	858.526	986.979	953.962	993.11	621.138	663.61	996.255	913.472	734.691	753.545	847.529
CLEC2L	P0C7M8	CLC2L_HUMAN	C-type lectin domain family 2 member L OS=Homo sapiens OX=9606 GN=CLEC2L PE=3 SV=1	6.98	24382.8	652.164	7	48.13	66.5374	71.988	55.1441	50.1591	127.538	131.915	82.1806	74.6413	105.5	120.275	88.5879
CAND1	Q86VP6	CAND1_HUMAN	Cullin-associated NEDD8-dissociated protein 1 OS=Homo sapiens OX=9606 GN=CAND1 PE=1 SV=2	5.42	138087	282.406	10	11.63	510.546	460.416	175.669	177.68	244.202	220.809	480.173	438.028	280.765	338.628	332.692
CDK18	Q07002	CDK18_HUMAN	Cyclin-dependent kinase 18 OS=Homo sapiens OX=9606 GN=CDK18 PE=1 SV=4	8.85	54766.7	458.803	9	27.85	764.787	687.658	1022.01	1060.93	936.912	906.817	740.015	805.345	905.989	1061.07	889.154
CDK5	Q00535	CDK5_HUMAN	Cyclin-dependent-like kinase 5 OS=Homo sapiens OX=9606 GN=CDK5 PE=1 SV=3	7.56	33760.7	918.487	8	33.22	175.144	153.864	155.797	150.76	157.822	165.101	146.314	154.432	175.536	202.428	163.72
CCNY	Q8ND76	CCNY_HUMAN	Cyclin-Y OS=Homo sapiens OX=9606 GN=CCNY PE=1 SV=2	6.84	39849.9	285.329	2	9.38	94.7048	74.5863	154.36	119.729	116.129	166.035	78.7836	104.346	175.255	118.765	120.269
CST3	P01034	CYTC_HUMAN	Cystatin-C OS=Homo sapiens OX=9606 GN=CST3 PE=1 SV=1	8.96	16027.4	1972.31	3	30.82	66.6487	45.7501	116.16	112.078	99.2628	100.939	100.733	88.6826	195.268	267.305	119.283
CSRP1	P21291	CSRP1_HUMAN	Cysteine and glycine-rich protein 1 OS=Homo sapiens OX=9606 GN=CSRP1 PE=1 SV=3	8.56	21422.8	20295.8	9	66.32	1166.67	1075.96	2024.07	2026.85	1857.09	1815.35	1228.45	1272.23	1674.74	1662.41	1580.38
CRIP2	P52943	CRIP2_HUMAN	Cysteine-rich protein 2 OS=Homo sapiens OX=9606 GN=CRIP2 PE=1 SV=1	8.75	23291.1	691.288	4	41.83	67.6474	62.8318	148.183	119.435	158.576	135.85	66.018	55.7526	126.304	73.8016	101.44
CYB5B	O43169	CYB5B_HUMAN	Cytochrome b5 type B OS=Homo sapiens OX=9606 GN=CYB5B PE=1 SV=3	4.69	16808.6	447.468	2	30.67	57.0467	62.1712	29.1579	59.705	67.0556	77.8265	37.3077	59.3801		69.8608	57.7235
UQCRC1	P31930	QCR1_HUMAN	Cytochrome b-c1 complex subunit 1_ mitochondrial OS=Homo sapiens OX=9606 GN=UQCRC1 PE=1 SV=3	5.95	53330.2	4568.53	17	56.46	1221.98	1080.47	1003.7	983.224	783.067	711.532	1242.68	1234.29	814.806	844.044	991.979
UQCRC2	P22695	QCR2_HUMAN	Cytochrome b-c1 complex subunit 2_ mitochondrial OS=Homo sapiens OX=9606 GN=UQCRC2 PE=1 SV=3	8.93	48614.2	3819.98	16	55.19	1124.42	1135.98	1105.2	1096.69	775.743	866.188	1230.56	1303.63	710.411	734.814	1008.36
UQCRB	P14927	QCR7_HUMAN	Cytochrome b-c1 complex subunit 7 OS=Homo sapiens OX=9606 GN=UQCRB PE=1 SV=2	9.31	13530.5	2389.16	8	63.96	81.0924	70.2339	67.915	67.1003	54.2995	47.8099	71.7404	80.3939	61.736	54.9896	65.7311
UQCRFS1	P47985	UCRI_HUMAN	Cytochrome b-c1 complex subunit Rieske_ mitochondrial OS=Homo sapiens OX=9606 GN=UQCRFS1 PE=1 SV=2	8.39	29953.2	913.095	7	32.85	317.219	311.737	456.972	387.662	322.637	330.735	364.286	620.253	284.95	175.48	357.193
CYCS	P99999	CYC_HUMAN	Cytochrome c OS=Homo sapiens OX=9606 GN=CYCS PE=1 SV=2	10.15	11862.8	10784.8	7	60.95	237.945	216.569	215.495	210.286	204.868	209.268	182.01	201.018	257.06	299.665	223.418
MT-CO2	P00403	COX2_HUMAN	Cytochrome c oxidase subunit 2 OS=Homo sapiens OX=9606 GN=MT-CO2 PE=1 SV=1	4.49	25736.2	2506.01	6	30.84	752.68	760.68	727.551	751.571	603.47	502.516	804.845	737.855	525.466	594.433	676.107
COX4I1	P13073	COX41_HUMAN	Cytochrome c oxidase subunit 4 isoform 1_ mitochondrial OS=Homo sapiens OX=9606 GN=COX4I1 PE=1 SV=1	10.11	19633.8	5970.1	8	32.54	438.525	387.23	446.752	344.905	266.283	254.853	401.51	366.464	243.958	231.113	338.159
COX5A	P20674	COX5A_HUMAN	Cytochrome c oxidase subunit 5A_ mitochondrial OS=Homo sapiens OX=9606 GN=COX5A PE=1 SV=2	6.39	16933.3	2153.19	4	21.33	78.6448	36.5014	46.7241	69.3733	30.7979	53.9785	70.8549	56.9148	86.4922	79.443	60.9725
COX6C	P09669	COX6C_HUMAN	Cytochrome c oxidase subunit 6C OS=Homo sapiens OX=9606 GN=COX6C PE=1 SV=2	10.97	8781.47	2397.88	3	36	107.851	95.2611	91.9549	121.675	77.12	64.8517	98.5555	102.607	68.4585	74.2242	90.2559
COX7A2	P14406	CX7A2_HUMAN	Cytochrome c oxidase subunit 7A2_ mitochondrial OS=Homo sapiens OX=9606 GN=COX7A2 PE=1 SV=1	10.26	9396	1829.77	2	27.71	36.9821	51.0022	68.5655	39.9693	51.3906	44.429	58.764	29.809	57.5166	43.7065	48.2135
NDUFA4	O00483	NDUA4_HUMAN	Cytochrome c oxidase subunit NDUFA4 OS=Homo sapiens OX=9606 GN=NDUFA4 PE=1 SV=1	9.85	9426.9	3167.58	5	55.56	110.114	141.064	104.874	108.023	111.459	119.955	130.615	125.155	121.181	111.553	118.399
CYC1	P08574	CY1_HUMAN	Cytochrome c1_ heme protein_ mitochondrial OS=Homo sapiens OX=9606 GN=CYC1 PE=1 SV=3	9.23	35764.2	1307.45	6	39.69	269.042	275.228	271.182	257.034	177.464	177.272	322.209	331.815	145.922	164.79	239.196
DYNC1H1	Q14204	DYHC1_HUMAN	Cytoplasmic dynein 1 heavy chain 1 OS=Homo sapiens OX=9606 GN=DYNC1H1 PE=1 SV=5	5.99	535146	3713.63	206	58.42	21037.5	21019.8	19232.6	18856.6	27344.2	25057.5	24653	27227.8	12770.1	13611.3	21081
DYNC1I1	O14576	DC1I1_HUMAN	Cytoplasmic dynein 1 intermediate chain 1 OS=Homo sapiens OX=9606 GN=DYNC1I1 PE=1 SV=2	4.82	73468.7	910.296	11	34.57	561.338	603.12	461.735	401.513	170.112	208.01	470.128	479.364	141.408	143.689	364.042
DYNC1I2	Q13409	DC1I2_HUMAN	Cytoplasmic dynein 1 intermediate chain 2 OS=Homo sapiens OX=9606 GN=DYNC1I2 PE=1 SV=3	4.91	71855.9	677.055	8	24.61	276.969	338.144	394.476	383.569	278.27	291.237	315.214	336.213	281.971	275.945	317.201
DYNC1LI1	Q9Y6G9	DC1L1_HUMAN	Cytoplasmic dynein 1 light intermediate chain 1 OS=Homo sapiens OX=9606 GN=DYNC1LI1 PE=1 SV=3	6	56864.4	1098.34	11	37.28	291.749	312.5	447.173	415.385	186.73	242.252	284.755	262.585	197.18	137.598	277.791
DYNC1LI2	O43237	DC1L2_HUMAN	Cytoplasmic dynein 1 light intermediate chain 2 OS=Homo sapiens OX=9606 GN=DYNC1LI2 PE=1 SV=1	5.97	54384.5	1398.55	20	57.72	583.322	558.248	591.923	588.655	598.235	515.22	579.393	673.828	458.55	443.571	559.094
CYFIP2	Q96F07	CYFP2_HUMAN	Cytoplasmic FMR1-interacting protein 2 OS=Homo sapiens OX=9606 GN=CYFIP2 PE=1 SV=2	6.99	150395	212.381	5	5.48	286.989	302.964	307.251	308.641	385.249	388.948	418.027	347.75	449.669	417.576	361.306
CNDP2	Q96KP4	CNDP2_HUMAN	Cytosolic non-specific dipeptidase OS=Homo sapiens OX=9606 GN=CNDP2 PE=1 SV=2	5.59	53220.7	2290.85	19	61.68	620.643	665.852	844.022	421.388	746.235	744.051	731.529	597.175	1083.57	1082.95	753.742
PHGDH	O43175	SERA_HUMAN	D-3-phosphoglycerate dehydrogenase OS=Homo sapiens OX=9606 GN=PHGDH PE=1 SV=4	6.31	57392	2385.5	17	41.84	1009.97	1112.21	726.193	830.199	866.065	847.865	437.711	442.972	853.433	943.681	807.031
ECH1	Q13011	ECH1_HUMAN	Delta(3_5)-Delta(2_4)-dienoyl-CoA isomerase_ mitochondrial OS=Homo sapiens OX=9606 GN=ECH1 PE=1 SV=2	8	36158.4	572.163	6	28.35	116.184	110.936	63.9319	43.6641	47.8871	40.2648	165.504	156.297	78.0349	85.8658	90.8571
ALDH4A1	P30038	AL4A1_HUMAN	Delta-1-pyrroline-5-carboxylate dehydrogenase_ mitochondrial OS=Homo sapiens OX=9606 GN=ALDH4A1 PE=1 SV=3	8.07	62175.8	2569.68	21	47.07	333.822	341.802	609.429	558.34	1034.88	1152.08	812.361	736.459	863.81	842.136	728.512
ALAD	P13716	HEM2_HUMAN	Delta-aminolevulinic acid dehydratase OS=Homo sapiens OX=9606 GN=ALAD PE=1 SV=1	6.37	36751.2	1386.56	7	30	178.15	198.315	219.195	248.415	97.4511	78.0346	91.6418	98.6714	158.924	134.531	150.333
DES	P17661	DESM_HUMAN	Desmin OS=Homo sapiens OX=9606 GN=DES PE=1 SV=3	5.03	53592.9	904.486	5	12.98	762.277	867.744	774.971	843.786	828.513	1079.09	787.273	630.973	872.167	1592.38	903.918
DSC1	Q08554	DSC1_HUMAN	Desmocollin-1 OS=Homo sapiens OX=9606 GN=DSC1 PE=1 SV=2	5.1	101470	462.739	5	7.16	111.153	1116.24	291.519	152.994		97.1795	441.02	765.221		189.8	395.64
DSG1	Q02413	DSG1_HUMAN	Desmoglein-1 OS=Homo sapiens OX=9606 GN=DSG1 PE=1 SV=2	4.72	114774	1163	16	20.5	149.777	1481.38	358.827	181.302		190.19	452.138	1836.74		587.303	654.707
DSP	P15924	DESP_HUMAN	Desmoplakin OS=Homo sapiens OX=9606 GN=DSP PE=1 SV=3	6.42	334227	1788.41	55	24.45	728.819	5474.98	1453.13	1095.08	347.041	1016.46	2237.93	7195.1	653.871	3504.46	2370.69
DSTN	P60981	DEST_HUMAN	Destrin OS=Homo sapiens OX=9606 GN=DSTN PE=1 SV=3	7.84	18962	3452.82	8	46.06	270.654	225.201	127.479	118.583	116.366	101.31	195.244	183.258	221.554	232.993	179.264
DLD	P09622	DLDH_HUMAN	Dihydrolipoyl dehydrogenase_ mitochondrial OS=Homo sapiens OX=9606 GN=DLD PE=1 SV=2	7.77	54747.6	880.283	12	33.6	367.762	348.301	403.599	375.005	206.45	202.097	379.741	368.381	236.868	199.441	308.765
DLAT	P10515	ODP2_HUMAN	Dihydrolipoyllysine-residue acetyltransferase component of pyruvate dehydrogenase complex_ mitochondrial OS=Homo sapiens OX=9606 GN=DLAT PE=1 SV=3	7.79	69510	371.082	6	10.97	282.192	305.265	303.892	306.165	85.3104	190.544	304.716	322.911	201.145	159.516	246.166
DLST	P36957	ODO2_HUMAN	Dihydrolipoyllysine-residue succinyltransferase component of 2-oxoglutarate dehydrogenase complex_ mitochondrial OS=Homo sapiens OX=9606 GN=DLST PE=1 SV=4	9.38	49097.6	656.812	10	27.81	403.452	313.092	546.128	458.628	462.678	456.115	419.795	431.861	592.915	586.771	467.143
QDPR	P09417	DHPR_HUMAN	Dihydropteridine reductase OS=Homo sapiens OX=9606 GN=QDPR PE=1 SV=2	7.19	26017.7	22951.6	14	68.03	1896.82	1986.87	1853.22	2131.46	1298.17	1275.95	1746.77	1723.4	2171.41	2204.79	1828.89
CRMP1	Q14194	DPYL1_HUMAN	Dihydropyrimidinase-related protein 1 OS=Homo sapiens OX=9606 GN=CRMP1 PE=1 SV=1	6.62	62526.1	4956.97	23	64.34	2458.45	2117.11	2318.88	1746.14	2325.1	2145.23	2273.35	2165.42	1884.41	2250.54	2168.46
DPYSL2	Q16555	DPYL2_HUMAN	Dihydropyrimidinase-related protein 2 OS=Homo sapiens OX=9606 GN=DPYSL2 PE=1 SV=1	5.95	62749.9	32738.8	32	84.62	13053.8	12560	8948.64	8842.17	12219.6	12517.3	12263.9	14125.8	11639.8	11685.9	11785.7
DPYSL3	Q14195	DPYL3_HUMAN	Dihydropyrimidinase-related protein 3 OS=Homo sapiens OX=9606 GN=DPYSL3 PE=1 SV=1	6.06	62362.6	5417.24	20	56.49	424.283	423.095	243.597	229.446	696.619	681.015	419.012	291.737	336.866	279.621	402.529
DPYSL4	O14531	DPYL4_HUMAN	Dihydropyrimidinase-related protein 4 OS=Homo sapiens OX=9606 GN=DPYSL4 PE=1 SV=2	6.69	62505	1896.66	22	70.8	465.282	484.545	429.092	393.266	754.056	686.034	539.722	576.017	732.241	748.307	580.856
DPYSL5	Q9BPU6	DPYL5_HUMAN	Dihydropyrimidinase-related protein 5 OS=Homo sapiens OX=9606 GN=DPYSL5 PE=1 SV=1	6.79	61991.7	6367.53	30	77.13	2732.69	2818.28	1593.25	1551.33	3311.69	3495.05	2775.61	3288.83	3452.74	4000.44	2901.99
DAAM2	Q86T65	DAAM2_HUMAN	Disheveled-associated activator of morphogenesis 2 OS=Homo sapiens OX=9606 GN=DAAM2 PE=1 SV=3	6.38	124355	911.005	29	37.08	1680.71	1592.75	2327.98	2742.23	1410.28	1767.46	2441.46	1673.93	1479.2	1651.05	1876.71
ADAM10	O14672	ADA10_HUMAN	Disintegrin and metalloproteinase domain-containing protein 10 OS=Homo sapiens OX=9606 GN=ADAM10 PE=1 SV=1	7.6	86195.2	884.062	14	31.82	748.371	729.951	1179.42	1214.2	1152.52	1079.55	512.465	635.495	1269.95	1453.49	997.542
ADAM22	Q9P0K1	ADA22_HUMAN	Disintegrin and metalloproteinase domain-containing protein 22 OS=Homo sapiens OX=9606 GN=ADAM22 PE=1 SV=1	6.85	103056	1176.74	20	35.21	864.634	727.9	1395.04	1406.36	1475.97	1364.81	800.711	713.705	1561.79	1558.27	1186.92
ADAM23	O75077	ADA23_HUMAN	Disintegrin and metalloproteinase domain-containing protein 23 OS=Homo sapiens OX=9606 GN=ADAM23 PE=1 SV=1	7.43	94492.4	942.043	12	25.6	1151.6	1868.64	1070.24	1350.17	1122.28	1511.36	1333.86	2133.7	1293.12	2076.79	1491.18
DLG1	Q12959	DLG1_HUMAN	Disks large homolog 1 OS=Homo sapiens OX=9606 GN=DLG1 PE=1 SV=2	5.41	100740	416.87	11	22.9	3386.77	2961.74	494.74	3766.88	4378.58	3736.57	3357.23	393.545	457.554	3324.13	2625.77
ERCC6L2	Q5T890	ER6L2_HUMAN	DNA excision repair protein ERCC-6-like 2 OS=Homo sapiens OX=9606 GN=ERCC6L2 PE=1 SV=2	8.71	179066	353.757	2	1.92	6211.69	5613.53		174.976	20075	21843.3	442.483	397.281			7822.6
DNAJA1	P31689	DNJA1_HUMAN	DnaJ homolog subfamily A member 1 OS=Homo sapiens OX=9606 GN=DNAJA1 PE=1 SV=2	6.7	45609.6	1182.05	10	48.87	1346.63	1194.2	300.719	1306.98	226.306	259.358	884.976	268.045	232.219	1385.86	740.53
DNAJA2	O60884	DNJA2_HUMAN	DnaJ homolog subfamily A member 2 OS=Homo sapiens OX=9606 GN=DNAJA2 PE=1 SV=1	6.07	46373	797.597	7	29.61	198.967	174.982	215.195	194.608	166.137	148.705	210.17	163.954	168.511	118.692	175.992
DNAJB2	P25686	DNJB2_HUMAN	DnaJ homolog subfamily B member 2 OS=Homo sapiens OX=9606 GN=DNAJB2 PE=1 SV=3	5.6	35694.2	2099.26	12	39.81	241.582	241.297	276.865	360.32	312.773	322.227	259.039	337.473	356.209	326.523	303.431
DNAJC5	Q9H3Z4	DNJC5_HUMAN	DnaJ homolog subfamily C member 5 OS=Homo sapiens OX=9606 GN=DNAJC5 PE=1 SV=1	4.75	22947.2	1216.19	3	37.37	83.1837	74.3774	121.507	162.003	205.919	175.696	123.232	100.733	188.533	190.336	142.552
MAP2K1	Q02750	MP2K1_HUMAN	Dual specificity mitogen-activated protein kinase kinase 1 OS=Homo sapiens OX=9606 GN=MAP2K1 PE=1 SV=2	6.21	43781.3	341.593	6	20.36	145.934	136.795	71.7881	78.2324	68.9191	73.244	156.981	202.785	82.1244	89.5969	110.64
MAP2K2	P36507	MP2K2_HUMAN	Dual specificity mitogen-activated protein kinase kinase 2 OS=Homo sapiens OX=9606 GN=MAP2K2 PE=1 SV=1	6.13	44709.3	322.921	4	12	156.831	134.092	89.4058	76.5321	59.6731	58.7434	111.764	118.64	45.0496	50.4137	90.1143
MAP2K4	P45985	MP2K4_HUMAN	Dual specificity mitogen-activated protein kinase kinase 4 OS=Homo sapiens OX=9606 GN=MAP2K4 PE=1 SV=1	8.07	44744	451.397	5	20.3	108.912	101.277	83.9731	85.4865	154.499	148.522	96.5805	133.869	152.545	178.553	124.422
DUSP15	Q9H1R2	DUS15_HUMAN	Dual specificity protein phosphatase 15 OS=Homo sapiens OX=9606 GN=DUSP15 PE=1 SV=4	8.31	32680	495.872	3	16.27	116.985	101.289	94.3944	77.5999	146.814	92.4154	85.666	75.5729	167.513	185.696	114.395
DCTN1	Q14203	DCTN1_HUMAN	Dynactin subunit 1 OS=Homo sapiens OX=9606 GN=DCTN1 PE=1 SV=3	5.5	142436	963.167	29	40.14	1561.64	1408.44	760.867	803.46	608.857	590.943	884.829	827.559	550.715	671.576	866.888
DCTN2	Q13561	DCTN2_HUMAN	Dynactin subunit 2 OS=Homo sapiens OX=9606 GN=DCTN2 PE=1 SV=4	4.93	44345.1	3734.24	17	63.84	484.478	532.251	281.301	259.38	156.319	148.467	282.165	244.413	246.261	220.693	285.573
DCTN3	O75935	DCTN3_HUMAN	Dynactin subunit 3 OS=Homo sapiens OX=9606 GN=DCTN3 PE=1 SV=1	5.19	21233.5	941.862	4	33.87	132.018	106.472	72.145	73.1087	45.9459	43.6989	70.9498	67.7505	65.2486	66.1191	74.3456
DCTN4	Q9UJW0	DCTN4_HUMAN	Dynactin subunit 4 OS=Homo sapiens OX=9606 GN=DCTN4 PE=1 SV=1	7.09	53249.6	605.12	9	30.22	202.982	209.019	113.372	118.818	73.3701	73.3455	117.02	128.586	96.8753	86.1341	121.952
DNM1	Q05193	DYN1_HUMAN	Dynamin-1 OS=Homo sapiens OX=9606 GN=DNM1 PE=1 SV=2	6.79	97807.7	8705.23	46	69.21	4666.88	4419.21	3471.2	3538.89	3632.05	3285.65	4499.47	4449.06	2712.87	2718.27	3739.35
DNM1L	O00429	DNM1L_HUMAN	Dynamin-1-like protein OS=Homo sapiens OX=9606 GN=DNM1L PE=1 SV=2	6.4	82390.5	472.461	11	27.58	243.674	226.465	155.655	178.392	260.489	225.767	309.724	312.458	326.443	328.502	256.757
DNM2	P50570	DYN2_HUMAN	Dynamin-2 OS=Homo sapiens OX=9606 GN=DNM2 PE=1 SV=2	7.15	98406.6	2025.46	30	43.91	722.118	719.847	639.641	672.532	665.115	5375.59	697.18	689.494	708.52	794.326	1168.44
DNM3	Q9UQ16	DYN3_HUMAN	Dynamin-3 OS=Homo sapiens OX=9606 GN=DNM3 PE=1 SV=4	8.5	98145.5	3224.06	38	53.51	976.191	1005.7	871.172	946.218	831.566	893.005	948.304	976.645	1004.81	1040.02	949.364
OPA1	O60313	OPA1_HUMAN	Dynamin-like 120 kDa protein_ mitochondrial OS=Homo sapiens OX=9606 GN=OPA1 PE=1 SV=3	7.79	112201	283.979	7	9.79	253.472	275.263	353.921	412.493	205.892	276.773	424.285	400.174	174.323	188.339	296.493
DYNLL1	P63167	DYL1_HUMAN	Dynein light chain 1_ cytoplasmic OS=Homo sapiens OX=9606 GN=DYNLL1 PE=1 SV=1	7.24	10537	26480.3	5	62.92	338.234	321.415	350.449	377.169	313.808	331.416	319.614	376.454	377.393	432.168	353.812
DYNLL2	Q96FJ2	DYL2_HUMAN	Dynein light chain 2_ cytoplasmic OS=Homo sapiens OX=9606 GN=DYNLL2 PE=1 SV=1	7.26	10463.9	17451.8	5	62.92	291.976	276.737	245.586	275.444	239.141	243.323	276.874	281.715	291.838	322.896	274.553
EHD1	Q9H4M9	EHD1_HUMAN	EH domain-containing protein 1 OS=Homo sapiens OX=9606 GN=EHD1 PE=1 SV=2	6.39	60684	1690.11	20	61.61	387.25	1026.9	820.919	423.047	663.695	622.581	407.176	403.61	675.817	673.533	610.453
EHD3	Q9NZN3	EHD3_HUMAN	EH domain-containing protein 3 OS=Homo sapiens OX=9606 GN=EHD3 PE=1 SV=2	6.13	60944.3	1625	20	62.8	271.248	319.557	325.006	321.895	586.872	568.691	367.216	329.308	666.884	647.587	440.426
EEF1A1	P68104	EF1A1_HUMAN	Elongation factor 1-alpha 1 OS=Homo sapiens OX=9606 GN=EEF1A1 PE=1 SV=1	9.49	50483.1	11399.7	19	73.81	2842.43	2890.56	3971.83	3597.87	3573.84	3558.14	2796.84	2901.32	2796.81	2646.75	3157.64
EEF1A2	Q05639	EF1A2_HUMAN	Elongation factor 1-alpha 2 OS=Homo sapiens OX=9606 GN=EEF1A2 PE=1 SV=1	9.49	50812.4	7160.47	16	70.63	1590.45	1646.77	942.016	1074.02	1273.38	1285.77	1013.43	1408.54	1164.63	1469.97	1286.9
EEF2	P13639	EF2_HUMAN	Elongation factor 2 OS=Homo sapiens OX=9606 GN=EEF2 PE=1 SV=4	6.43	96307.8	512.949	9	14.57	306.73	324.581	234.367	250.126	177.49	188.631	315.637	2672.25	186.863	233.18	488.985
TUFM	P49411	EFTU_HUMAN	Elongation factor Tu_ mitochondrial OS=Homo sapiens OX=9606 GN=TUFM PE=1 SV=2	7.39	49883.8	3861.89	21	67.48	490.184	493.954	677.445	562.928	371	386.26	741.746	647.97	404.113	337.426	511.303
ENDOD1	O94919	ENDD1_HUMAN	Endonuclease domain-containing 1 protein OS=Homo sapiens OX=9606 GN=ENDOD1 PE=1 SV=2	5.4	55758	4249.34	17	58	4023.1	3065.78	3743.38	3829.14	3846.16	3174.75	3742.65	3870.32	4384.66	4438.26	3811.82
SH3GL2	Q99962	SH3G2_HUMAN	Endophilin-A1 OS=Homo sapiens OX=9606 GN=SH3GL2 PE=1 SV=1	5.17	40133.5	719.635	5	20.17	140.387	123.077	71.32	57.9942	58.4302	53.661	138.12	127.395	73.5482		93.7702
SH3GLB2	Q9NR46	SHLB2_HUMAN	Endophilin-B2 OS=Homo sapiens OX=9606 GN=SH3GLB2 PE=1 SV=1	5.64	44202.1	437.566	6	17.97	131.147	92.1657	109.704	113.89	61.8145	79.5028	113.795	102.671	70.2331	66.4948	94.1418
HSPA5	P11021	BIP_HUMAN	Endoplasmic reticulum chaperone BiP OS=Homo sapiens OX=9606 GN=HSPA5 PE=1 SV=2	4.88	72447.1	2123.73	14	31.35	409.034	272.519	314.982	285.337	185.254	167.862	313.503	309.855	211.783	215.717	268.585
HSP90B1	P14625	ENPL_HUMAN	Endoplasmin OS=Homo sapiens OX=9606 GN=HSP90B1 PE=1 SV=1	4.56	92754.2	1270.24	21	37.98	406.377	375.238	586.265	497.66	269.003	300.742	557.988	546.244	293.675	312.158	414.535
ELMO1	Q92556	ELMO1_HUMAN	Engulfment and cell motility protein 1 OS=Homo sapiens OX=9606 GN=ELMO1 PE=1 SV=2	5.87	84571	341.149	9	19.94	202.457	211.653	291.136	315.759	259.99	289.282	200.651	203.741	287.341	321.712	258.372
ECHS1	P30084	ECHM_HUMAN	Enoyl-CoA hydratase_ mitochondrial OS=Homo sapiens OX=9606 GN=ECHS1 PE=1 SV=4	8.07	31843.7	794.611	5	26.9	75.2267	80.3888	97.4621	89.2445	31.248	47.4983	83.2923	103.718	45.3912	49.6472	70.3117
EPHX1	P07099	HYEP_HUMAN	Epoxide hydrolase 1 OS=Homo sapiens OX=9606 GN=EPHX1 PE=1 SV=1	6.87	53177.1	718.711	11	34.73	175.544	198.814	239.433	264.975	184.123	203.494	227.316	253.349	139.042	170.82	205.691
ERLIN2	O94905	ERLN2_HUMAN	Erlin-2 OS=Homo sapiens OX=9606 GN=ERLIN2 PE=1 SV=1	5.33	38067.7	601.445	3	12.39	100.012	97.3057	112.386	102.466	87.892	87.1194	91.5371	80.8015	68.6848		92.0227
ERMN	Q8TAM6	ERMIN_HUMAN	Ermin OS=Homo sapiens OX=9606 GN=ERMN PE=2 SV=1	4.56	32897.1	2222.9	10	42.96	391.726	188.276	499.91	459.27	262.233	211.993	256.465	162.473	486.786	352.178	327.131
EIF4A1	P60842	IF4A1_HUMAN	Eukaryotic initiation factor 4A-I OS=Homo sapiens OX=9606 GN=EIF4A1 PE=1 SV=1	5.16	46382.2	588.848	7	22.41	170.362	185.263	142.01	132.236	93.9568	93.6452	184.767	186.637	106.066	117.935	141.288
EIF4H	Q15056	IF4H_HUMAN	Eukaryotic translation initiation factor 4H OS=Homo sapiens OX=9606 GN=EIF4H PE=1 SV=5	7.21	27442.1	648.828	4	26.61	115.929	122.38	68.6518	69.7995	56.9995	59.4716	88.4194	84.3843	53.3176	55.9833	77.5336
EZR	P15311	EZRI_HUMAN	Ezrin OS=Homo sapiens OX=9606 GN=EZR PE=1 SV=4	5.9	69527	4483.41	26	51.02	363.189	369.178	737.01	764.093	600.922	569.615	490.679	906.929	461.392	485.095	574.81
CAPZA1	P52907	CAZA1_HUMAN	F-actin-capping protein subunit alpha-1 OS=Homo sapiens OX=9606 GN=CAPZA1 PE=1 SV=3	5.34	33093.9	770.492	5	20.98	120.434	86.0725	130.305	106.424	100.318	82.4265	111.972	93.3045	136.612	87.0764	105.494
CAPZA2	P47755	CAZA2_HUMAN	F-actin-capping protein subunit alpha-2 OS=Homo sapiens OX=9606 GN=CAPZA2 PE=1 SV=3	5.49	33177.2	526.707	6	36.36	113.67	103.572	70.9946	65.001	47.0582	47.1226	72.2256	81.2376	102.85	64.8556	76.8587
CAPZB	P47756	CAPZB_HUMAN	F-actin-capping protein subunit beta OS=Homo sapiens OX=9606 GN=CAPZB PE=1 SV=4	5.21	31635.7	893.318	6	39.71	129.439	124.3	108.356	81.4708	54.9691	51.9908	85.4004	84.8602	81.2337	66.6811	86.8701
FSCN1	Q16658	FSCN1_HUMAN	Fascin OS=Homo sapiens OX=9606 GN=FSCN1 PE=1 SV=3	6.9	55157.3	4985.59	24	65.31	2152.19	2090.48	1518.75	1330.6	1927.51	1953.7	1691.46	1629.28	2892.76	3049.44	2023.62
FASN	P49327	FAS_HUMAN	Fatty acid synthase OS=Homo sapiens OX=9606 GN=FASN PE=1 SV=3	6.02	276050	632.406	27	16.09	1568.55	1441.05	711.061	713.998	377.659	370.892	618.251	577.967	460.76	567.447	740.763
FABP5	Q01469	FABP5_HUMAN	Fatty acid-binding protein 5 OS=Homo sapiens OX=9606 GN=FABP5 PE=1 SV=3	6.82	15506.6	1429.28	6	53.33	29.9751	98.6141	64.2981	46.9671	24.6586	38.4246	96.5054	137.831	33.0136	73.9659	64.4254
FBXO2	Q9UK22	FBX2_HUMAN	F-box only protein 2 OS=Homo sapiens OX=9606 GN=FBXO2 PE=1 SV=2	4.1	33726.9	1241.39	8	40.54	338.385	323.343	138.181	146.561	101.769	94.8494	329.512	304.66	105.521	87.6516	197.043
FTH1	P02794	FRIH_HUMAN	Ferritin heavy chain OS=Homo sapiens OX=9606 GN=FTH1 PE=1 SV=2	5.2	21396.8	3142.55	10	69.95	349.324	323.149	298.929	334.371	355.519	396.081	326.181	277.664	391.919	492.509	354.564
FTL	P02792	FRIL_HUMAN	Ferritin light chain OS=Homo sapiens OX=9606 GN=FTL PE=1 SV=2	5.42	20076.7	1608.76	5	41.14	87.4726	82.3824	52.925	52.8219	104.219	110.227	68.4572	64.2059	101.267	124.874	84.8852
FGB	P02675	FIBB_HUMAN	Fibrinogen beta chain OS=Homo sapiens OX=9606 GN=FGB PE=1 SV=2	8.26	56612.6	691.413	10	33.4	52.8549	45.9973	156.281	218.756	109.343	107.893	372.741	342.545			175.801
FGG	P02679	FIBG_HUMAN	Fibrinogen gamma chain OS=Homo sapiens OX=9606 GN=FGG PE=1 SV=3	5.25	52139	930.456	8	27.15	667.069	836.345	669.781	868.802	709.544	680.839	733.593	859.776	608.937	1315.6	795.029
FSD1	Q9BTV5	FSD1_HUMAN	Fibronectin type III and SPRY domain-containing protein 1 OS=Homo sapiens OX=9606 GN=FSD1 PE=1 SV=1	6.6	56276	295.102	3	10.89	145.906	134.347	85.7688	104.288	90.5823	61.935	137.153	129.517	90.2921	108.154	108.794
FLG2	Q5D862	FILA2_HUMAN	Filaggrin-2 OS=Homo sapiens OX=9606 GN=FLG2 PE=1 SV=1	8.12	249441	369.151	6	5.1	704.102	4015.83	534.395	908.92	330.452	625.761	933.001	2516.45	391.494	1028.2	1198.86
FLOT1	O75955	FLOT1_HUMAN	Flotillin-1 OS=Homo sapiens OX=9606 GN=FLOT1 PE=1 SV=3	7.32	47583.5	944.311	15	49.18	559.536	553.093	620.617	604.936	613.053	628.904	543.059	545.759	667.141	847.037	618.313
FLOT2	Q14254	FLOT2_HUMAN	Flotillin-2 OS=Homo sapiens OX=9606 GN=FLOT2 PE=1 SV=2	5	47463.4	856.83	14	48.6	917.901	1063.56	742.315	734.984	383.485	407.616	696.395	837.279	401.156	429.38	661.407
FMNL2	Q96PY5	FMNL2_HUMAN	Formin-like protein 2 OS=Homo sapiens OX=9606 GN=FMNL2 PE=1 SV=3	7.06	123777	2037.36	35	38.49	5278.91	5473.99	5514.28	6346.83	4321.11	4391.47	3459.84	4455.86	4646.14	6476.04	5036.45
FHL1	Q13642	FHL1_HUMAN	Four and a half LIM domains protein 1 OS=Homo sapiens OX=9606 GN=FHL1 PE=1 SV=4	9.05	38030.9	6142.25	10	39.63	457.401	429.112	1002.62	937.597	1273.13	1396.76	684.477	667.232	670.108	644.822	816.326
FN3K	Q9H479	FN3K_HUMAN	Fructosamine-3-kinase OS=Homo sapiens OX=9606 GN=FN3K PE=1 SV=1	7.36	35399.4	1969.43	10	38.51	444.233	398.464	494.613	450.748	650.578	548.043	566.227	515.085	595.013	577.591	524.06
ALDOA	P04075	ALDOA_HUMAN	Fructose-bisphosphate aldolase A OS=Homo sapiens OX=9606 GN=ALDOA PE=1 SV=2	8.07	39876.3	9180.06	24	89.29	1758.54	1858.02	1555.22	1315.44	1266.46	1323.04	1771.23	1850.62	1893.3	1796.74	1638.86
ALDOC	P09972	ALDOC_HUMAN	Fructose-bisphosphate aldolase C OS=Homo sapiens OX=9606 GN=ALDOC PE=1 SV=2	6.47	39855.1	3250.63	17	61.26	808.026	578.875	461.387	470.821	515.24	597.831	635.162	745.196	748.786	840.729	640.205
FH	P07954	FUMH_HUMAN	Fumarate hydratase_ mitochondrial OS=Homo sapiens OX=9606 GN=FH PE=1 SV=3	9.18	54808.2	410.031	3	10.98	118.57	188.91	132.387	190.764	136.162	156.639	300.846	274.828	203.437	195.746	189.829
LGALS1	P09382	LEG1_HUMAN	Galectin-1 OS=Homo sapiens OX=9606 GN=LGALS1 PE=1 SV=2	5.15	15057.9	1513.5	5	64.44	114.002	93.5262	60.7606	85.4996	70.9521	102.195	65.7324	98.8338	84.5567	104.517	88.0576
ADD3	Q9UEY8	ADDG_HUMAN	Gamma-adducin OS=Homo sapiens OX=9606 GN=ADD3 PE=1 SV=1	5.9	79496.9	382.885	4	6.09	243.456	197.122	292.259	262.993	199.796	202.284	242.209	215.325	113.517	130.608	209.957
ENO2	P09104	ENOG_HUMAN	Gamma-enolase OS=Homo sapiens OX=9606 GN=ENO2 PE=1 SV=3	4.72	47610.8	10714.7	19	74.19	552.114	500.677	458.288	461.21	512.283	489.421	597.952	583.075	684.31	644.623	548.395
NAPG	Q99747	SNAG_HUMAN	Gamma-soluble NSF attachment protein OS=Homo sapiens OX=9606 GN=NAPG PE=1 SV=1	5.13	35088.5	883.909	7	31.09	188.93	153.197	141.882	181.164	122.558	121.502	152.106	130.713	159.993	140.543	149.259
GDAP1	Q8TB36	GDAP1_HUMAN	Ganglioside-induced differentiation-associated protein 1 OS=Homo sapiens OX=9606 GN=GDAP1 PE=1 SV=3	8.51	41573.9	826.853	5	25.42	179.216	159.81	214.412	192.588	163.13	157.253	220.611	192	135.576	114.862	172.946
GJA1	P17302	CXA1_HUMAN	Gap junction alpha-1 protein OS=Homo sapiens OX=9606 GN=GJA1 PE=1 SV=2	8.93	43521.7	818.968	5	19.11	85.7962	124.233	359.175	402.781	174.917	175.049	171.223	158.042	58.0877	51.1979	176.05
GJB1	P08034	CXB1_HUMAN	Gap junction beta-1 protein OS=Homo sapiens OX=9606 GN=GJB1 PE=1 SV=1	9.07	32594.8	723.303	3	12.72	3917.6	3715.25	5943.42	6548.24	7354.36	7580.45	4634.91	6851.23	7708.95	8994.54	6324.89
GSN	P06396	GELS_HUMAN	Gelsolin OS=Homo sapiens OX=9606 GN=GSN PE=1 SV=1	5.87	86096.8	6064.73	28	52.94	4982.81	4680.07	5645.05	4905.31	3963.54	4323.01	4079.21	4372.91	5850.43	5723.39	4852.57
GFAP	P14136	GFAP_HUMAN	Glial fibrillary acidic protein OS=Homo sapiens OX=9606 GN=GFAP PE=1 SV=1	5.26	49937.3	21109.7	34	77.55	13233.3	11469.1	14254.1	15994.8	16746.1	16954	6132.08	5463.09	3076.1	3297.03	10662
GPI	P06744	G6PI_HUMAN	Glucose-6-phosphate isomerase OS=Homo sapiens OX=9606 GN=GPI PE=1 SV=4	8.49	63375.4	8947.36	27	59.86	5610.3	5064.56	3805.22	3837.61	6103.01	5651.94	5986.05	4996.75	7367.68	5863.05	5428.61
FOLH1	Q04609	FOLH1_HUMAN	Glutamate carboxypeptidase 2 OS=Homo sapiens OX=9606 GN=FOLH1 PE=1 SV=1	6.55	84558.9	376.718	4	9.73	104.121	157.264	191.79	295.26	288.583	271.794	150.794	193.947	213.328	296.394	216.327
GLUD1	P00367	DHE3_HUMAN	Glutamate dehydrogenase 1_ mitochondrial OS=Homo sapiens OX=9606 GN=GLUD1 PE=1 SV=2	7.72	61740.1	4264.95	22	62.54	1872.09	1837.89	1475.6	1445.9	550.95	572.487	1469.8	1471.69	800.886	746.932	1224.42
GLS	O94925	GLSK_HUMAN	Glutaminase kidney isoform_ mitochondrial OS=Homo sapiens OX=9606 GN=GLS PE=1 SV=1	7.61	74316.7	1096.42	19	42	684.439	605.074	451.22	423.658	226.071	241.174	616.41	561.332	309.077	290.821	440.928
GLUL	P15104	GLNA_HUMAN	Glutamine synthetase OS=Homo sapiens OX=9606 GN=GLUL PE=1 SV=4	6.48	42691.8	1509.92	10	53.35	438.612	443.197	327.965	294.405	203.462	229.993	420.84	433.443	426.053	377.168	359.514
LANCL1	O43813	LANC1_HUMAN	Glutathione S-transferase LANCL1 OS=Homo sapiens OX=9606 GN=LANCL1 PE=1 SV=1	7.63	46024.5	3396.57	16	51.63	1311.53	1401.4	1688.36	1799.01	1683.54	1669.93	1257.74	1170.61	1985.6	1776.02	1574.37
GSTM3	P21266	GSTM3_HUMAN	Glutathione S-transferase Mu 3 OS=Homo sapiens OX=9606 GN=GSTM3 PE=1 SV=3	5.22	27015.9	1201.97	6	35.11	105.269	120.619	57.0928	51.9392	61.8186	65.7068	99.8947	107.856		36.6115	78.5343
GSTP1	P09211	GSTP1_HUMAN	Glutathione S-transferase P OS=Homo sapiens OX=9606 GN=GSTP1 PE=1 SV=2	5.29	23584	1689.68	7	67.14	93.9446	80.3844	95.3823	105.954	95.1997	82.3889	136.492	117.33	174.122	179.12	116.032
GAPDH	P04406	G3P_HUMAN	Glyceraldehyde-3-phosphate dehydrogenase OS=Homo sapiens OX=9606 GN=GAPDH PE=1 SV=3	8.73	36224.4	30237.2	16	73.13	10572.6	7627.16	8376.12	7609.95	7131.71	7272.81	7597.89	8189.3	7742.67	7395.91	7951.62
GPD1	P21695	GPDA_HUMAN	Glycerol-3-phosphate dehydrogenase [NAD(+)]_ cytoplasmic OS=Homo sapiens OX=9606 GN=GPD1 PE=1 SV=4	5.78	38195	324.777	3	12.89	76.9023	268.579	75.116	64.5112	80.1158	75.903	161.718	139.101	115.26	144.065	120.127
ENPP6	Q6UWR7	ENPP6_HUMAN	Glycerophosphocholine cholinephosphodiesterase ENPP6 OS=Homo sapiens OX=9606 GN=ENPP6 PE=1 SV=2	7.98	50583.3	11479.9	17	58.64	3142.75	3443.04	2581.94	2709.23	2222.88	2375.37	2239.44	2595.69	2937.35	2805.13	2705.28
PYGB	P11216	PYGB_HUMAN	Glycogen phosphorylase_ brain form OS=Homo sapiens OX=9606 GN=PYGB PE=1 SV=5	6.43	97380.5	1747.4	34	51.6	2094.87	2220.33	1340.72	1357.67	1833.53	2106.19	1993.67	2064.03	898.508	1075.21	1698.47
PYGM	P11217	PYGM_HUMAN	Glycogen phosphorylase_ muscle form OS=Homo sapiens OX=9606 GN=PYGM PE=1 SV=6	6.62	97548.5	504.791	11	18.41	404.829	439.57	316.203	365.5	358.013	316.999	297.386	287.875	161.044	201.006	314.843
GLTP	Q9NZD2	GLTP_HUMAN	Glycolipid transfer protein OS=Homo sapiens OX=9606 GN=GLTP PE=1 SV=3	7.24	24020.9	2867.02	9	55.5	127.038	117.553	138.793	152.885	113.154	98.4836	170.153	161.948	238.196	242.947	156.115
GRHPR	Q9UBQ7	GRHPR_HUMAN	Glyoxylate reductase/hydroxypyruvate reductase OS=Homo sapiens OX=9606 GN=GRHPR PE=1 SV=1	7.16	36067.5	377.552	2	12.5	138.59	156.911	154.182	145.651	106.436	115.17	129.049	146.305	160.407	176.304	142.9
GLIPR2	Q9H4G4	GAPR1_HUMAN	Golgi-associated plant pathogenesis-related protein 1 OS=Homo sapiens OX=9606 GN=GLIPR2 PE=1 SV=3	9.91	17332.4	14092.5	8	72.73	874.315	759.766	841.772	822.795	923.925	921.761	883.446	730.365	1058.06	1037.62	885.382
GOLGA7	Q7Z5G4	GOGA7_HUMAN	Golgin subfamily A member 7 OS=Homo sapiens OX=9606 GN=GOLGA7 PE=1 SV=2	6.9	16052.2	1860.8	4	32.12	23.7831	29.2456	73.7234	83.4929	71.3341	55.8099	60.4004	45.5188	76.8283	88.2554	60.8392
GPRC5B	Q9NZH0	GPC5B_HUMAN	G-protein coupled receptor family C group 5 member B OS=Homo sapiens OX=9606 GN=GPRC5B PE=2 SV=2	8.2	45308.3	579.352	4	13.4	142.922	146.942	204.668	217.072	380.229	349.888	74.0127	76.4093	453.071	476.996	252.221
GAS7	O60861	GAS7_HUMAN	Growth arrest-specific protein 7 OS=Homo sapiens OX=9606 GN=GAS7 PE=1 SV=3	7.03	54713.7	785.208	7	27.94	408.582	1540	641.423	663.916	273.068	464.087	1349.91	1908.43	476.04	1014.23	873.969
HRAS	P01112	RASH_HUMAN	GTPase HRas OS=Homo sapiens OX=9606 GN=HRAS PE=1 SV=1	4.98	21640.3	4686.14	10	74.6	82.4831	75.6854	127.128	104.175	135.355	143.674	116.339	116.097	147.623	142.262	119.082
KRAS	P01116	RASK_HUMAN	GTPase KRas OS=Homo sapiens OX=9606 GN=KRAS PE=1 SV=1	6.4	21941	5151.53	9	63.49	127.229	101.873	195.67	184.663	208.725	236.503	190.11	194.395	235.223	226.712	190.11
RAN	P62826	RAN_HUMAN	GTP-binding nuclear protein Ran OS=Homo sapiens OX=9606 GN=RAN PE=1 SV=3	7.33	24594.2	1451.23	8	44.44	188.934	175.188	106.555	97.6278	155.321	147.674	194.285	189.714	161.677	147.494	156.447
DIRAS2	Q96HU8	DIRA2_HUMAN	GTP-binding protein Di-Ras2 OS=Homo sapiens OX=9606 GN=DIRAS2 PE=1 SV=1	9	22827.1	726.277	5	29.15	54.8743	55.9893	30.3264	26.9177	35.6364	36.7515	40.9986	34.841	29.0035		38.371
RHEB	Q15382	RHEB_HUMAN	GTP-binding protein Rheb OS=Homo sapiens OX=9606 GN=RHEB PE=1 SV=1	5.57	20554.6	382.974	2	9.78	30.7809	26.9595	29.8194	29.9348	30.65	26.2955	31.0337	30.4629	33.6976	24.7426	29.4377
SAR1A	Q9NR31	SAR1A_HUMAN	GTP-binding protein SAR1a OS=Homo sapiens OX=9606 GN=SAR1A PE=1 SV=1	6.27	22480.9	620.143	5	38.89	770.296	632.026	912.749	877.587	975.104	935.304	739.701	753.385	1343.28	871.971	881.141
SAR1B	Q9Y6B6	SAR1B_HUMAN	GTP-binding protein SAR1b OS=Homo sapiens OX=9606 GN=SAR1B PE=1 SV=1	5.72	22524	391.846	2	15.66	6.99586	22.3415	23.1387	19.4481	17.8812	6.67085	31.7324	30.4815	4.41007	4.22996	16.733
GNAI3	P08754	GNAI3_HUMAN	Guanine nucleotide-binding protein G(i) subunit alpha OS=Homo sapiens OX=9606 GN=GNAI3 PE=1 SV=3	5.37	41102.5	3952.38	11	38.42	56.3723	66.3781	81.68	66.7154	84.5205	99.5925	75.122	71.4101	66.3149	72.9596	74.1065
GNAI1	P63096	GNAI1_HUMAN	Guanine nucleotide-binding protein G(i) subunit alpha-1 OS=Homo sapiens OX=9606 GN=GNAI1 PE=1 SV=2	5.61	40931.4	15553.8	17	58.76	1554.67	1469.87	1808.49	1867.18	2333.41	2251.47	1875.25	1830.88	2041.14	2154.81	1918.72
GNAI2	P04899	GNAI2_HUMAN	Guanine nucleotide-binding protein G(i) subunit alpha-2 OS=Homo sapiens OX=9606 GN=GNAI2 PE=1 SV=3	5.2	41021.3	13865.1	20	68.17	1679.63	1517.47	1875.85	1795.84	2081.75	2139.95	2087.25	2160.32	1877.74	2007.71	1922.35
GNG10	P50151	GBG10_HUMAN	Guanine nucleotide-binding protein G(I)/G(S)/G(O) subunit gamma-10 OS=Homo sapiens OX=9606 GN=GNG10 PE=1 SV=1	7.98	7376.43	5138.24	2	60.29	27.3264		75.9398	28.2209	58.0127	41.9843	60.8366	53.7775	48.056	72.7265	51.8756
GNG12	Q9UBI6	GBG12_HUMAN	Guanine nucleotide-binding protein G(I)/G(S)/G(O) subunit gamma-12 OS=Homo sapiens OX=9606 GN=GNG12 PE=1 SV=3	9.48	8120.29	2559.76	3	44.44	20.7566	19.6568	38.9484	39.5935	33.7308	34.1734	29.6029	25.9382	28.4574	25.6285	29.6487
GNG2	P59768	GBG2_HUMAN	Guanine nucleotide-binding protein G(I)/G(S)/G(O) subunit gamma-2 OS=Homo sapiens OX=9606 GN=GNG2 PE=1 SV=2	8.23	7964.22	960.509	2	42.25	9.87438	9.74866	15.6292	17.0015	24.1998	23.5942	12.8316	13.5246	20.4206	23.0782	16.9903
GNG3	P63215	GBG3_HUMAN	Guanine nucleotide-binding protein G(I)/G(S)/G(O) subunit gamma-3 OS=Homo sapiens OX=9606 GN=GNG3 PE=1 SV=1	7.83	8532.89	4063.52	2	60	47.9371	49.0924	57.9148	51.9439	71.4247	58.8832	50.7373	36.7782	47.2777	41.8014	51.3791
GNG7	O60262	GBG7_HUMAN	Guanine nucleotide-binding protein G(I)/G(S)/G(O) subunit gamma-7 OS=Homo sapiens OX=9606 GN=GNG7 PE=1 SV=1	8.87	7635.83	27347.3	4	57.35	526.12	491.162	549.213	577.88	602.531	649.696	540.093	534.168	665.288	703.825	583.998
GNB1	P62873	GBB1_HUMAN	Guanine nucleotide-binding protein G(I)/G(S)/G(T) subunit beta-1 OS=Homo sapiens OX=9606 GN=GNB1 PE=1 SV=3	5.56	38175.4	33520.3	11	70.29	5322.8	4916.4	5969.23	5660	6606.75	5558.79	5221.74	5648.07	6596.67	5207.49	5670.79
GNB2	P62879	GBB2_HUMAN	Guanine nucleotide-binding protein G(I)/G(S)/G(T) subunit beta-2 OS=Homo sapiens OX=9606 GN=GNB2 PE=1 SV=3	5.56	38072.5	17045.7	12	62.94	1325.62	1293.98	1475.71	1536.68	1616.82	1686.57	1514.41	1488.57	1676.03	1478.01	1509.24
GNAO1	P09471	GNAO_HUMAN	Guanine nucleotide-binding protein G(o) subunit alpha OS=Homo sapiens OX=9606 GN=GNAO1 PE=1 SV=4	5.2	40620.9	15088.6	16	52.26	3351.11	3074.45	3891.12	3760.37	3949.07	4049.52	3044.39	3663.51	4276.55	4019.34	3707.94
GNAL	P38405	GNAL_HUMAN	Guanine nucleotide-binding protein G(olf) subunit alpha OS=Homo sapiens OX=9606 GN=GNAL PE=1 SV=1	6.25	44821.8	866.086	6	13.39	54.5181	70.0267	71.5091	82.7671	82.4058	86.0387	85.7562	76.153	100.065	92.0086	80.1249
GNAQ	P50148	GNAQ_HUMAN	Guanine nucleotide-binding protein G(q) subunit alpha OS=Homo sapiens OX=9606 GN=GNAQ PE=1 SV=4	5.35	42427.3	6374.13	17	59.89	1263.85	1216.26	1648.38	1572.18	1662.07	1611.6	1279.22	1353.82	1522.77	1771.13	1490.13
GNAS	Q5JWF2	GNAS1_HUMAN	Guanine nucleotide-binding protein G(s) subunit alpha isoforms XLas OS=Homo sapiens OX=9606 GN=GNAS PE=1 SV=2	4.73	111766	2708.72	17	18.8	1359.53	1464.62	1933.1	1950.35	1840.53	1809.51	1922.65	1938.74	1694.81	1781.16	1769.5
GNAZ	P19086	GNAZ_HUMAN	Guanine nucleotide-binding protein G(z) subunit alpha OS=Homo sapiens OX=9606 GN=GNAZ PE=1 SV=3	7.5	41437.1	2580.82	12	44.23	249.765	237.66	316.469	319.295	346.516	342.234	279.682	232.634	343.264	366.98	303.45
GNA11	P29992	GNA11_HUMAN	Guanine nucleotide-binding protein subunit alpha-11 OS=Homo sapiens OX=9606 GN=GNA11 PE=1 SV=2	5.38	42408.6	2580.22	15	46.8	273.504	224.767	381.479	352.375	450.829	463.432	329.546	335.7	515.609	510.906	383.815
GNA13	Q14344	GNA13_HUMAN	Guanine nucleotide-binding protein subunit alpha-13 OS=Homo sapiens OX=9606 GN=GNA13 PE=1 SV=2	8	44391.8	2555.88	17	54.91	429.13	348.524	513.219	543.151	540.382	523.739	449.931	385.331	585.628	517.619	483.666
GNA14	O95837	GNA14_HUMAN	Guanine nucleotide-binding protein subunit alpha-14 OS=Homo sapiens OX=9606 GN=GNA14 PE=1 SV=1	5.72	42026.9	1550.37	8	25.63	922.271	873.168	647.446	732.088	1103.01	891.831	511.806	527.211	375.112	582.381	716.633
GNB4	Q9HAV0	GBB4_HUMAN	Guanine nucleotide-binding protein subunit beta-4 OS=Homo sapiens OX=9606 GN=GNB4 PE=1 SV=3	5.58	38308.6	11159.4	9	43.82	234.553	203.311	242.987	364.037	357.717	363.819	251.867	274.366	332.671	348.532	297.386
HSPA12A	O43301	HS12A_HUMAN	Heat shock 70 kDa protein 12A OS=Homo sapiens OX=9606 GN=HSPA12A PE=1 SV=2	6.35	75263.6	8989.93	32	61.04	6635.83	7000.19	5832.44	6465.14	5904.74	5742.1	5860.21	5558.86	3466.96	4033.81	5650.03
HSPA1L	P34931	HS71L_HUMAN	Heat shock 70 kDa protein 1-like OS=Homo sapiens OX=9606 GN=HSPA1L PE=1 SV=2	5.66	70774.3	3053.73	11	25.59	301.806	268.822	266.567	308.44	284.725	309.7	299.872	317.232	294.112	330.888	298.217
HSPA4L	O95757	HS74L_HUMAN	Heat shock 70 kDa protein 4L OS=Homo sapiens OX=9606 GN=HSPA4L PE=1 SV=3	5.53	95539.2	893.49	13	24.08	267.541	256.222	219.029	160.097	119.868	106.886	467.551	423.286			252.56
HSPA6	P17066	HSP76_HUMAN	Heat shock 70 kDa protein 6 OS=Homo sapiens OX=9606 GN=HSPA6 PE=1 SV=2	5.75	71484.5	2754.82	9	19.28	876.818	840.455	829.552	793.08	838.037	992.36	826.411	919.793	743.665	723.478	838.365
HSPA8	P11142	HSP7C_HUMAN	Heat shock cognate 71 kDa protein OS=Homo sapiens OX=9606 GN=HSPA8 PE=1 SV=1	5.2	71126.3	10949.5	30	63.47	3575.35	3439.31	2587.04	2635.87	2509.14	2566.16	2968.82	3007.94	2717.19	2345.99	2835.28
TRAP1	Q12931	TRAP1_HUMAN	Heat shock protein 75 kDa_ mitochondrial OS=Homo sapiens OX=9606 GN=TRAP1 PE=1 SV=3	8.31	80395.3	2072.19	2	6.53		295.028	317.834	335.083	170.523	624.504	125.93	219.233	357.92	781.087	358.571
HSPB1	P04792	HSPB1_HUMAN	Heat shock protein beta-1 OS=Homo sapiens OX=9606 GN=HSPB1 PE=1 SV=2	5.99	22839.6	1836.22	8	62.44	272.076	327.896	314.316	270.246	266.867	300.572	268.365	293.848	117.047	121.492	255.272
HSP90AA1	P07900	HS90A_HUMAN	Heat shock protein HSP 90-alpha OS=Homo sapiens OX=9606 GN=HSP90AA1 PE=1 SV=5	4.75	85059.1	6172.74	31	51.37	1617.86	1505.27	1377.3	1399.66	916.137	1095.35	2306.43	2326.44	1165.72	1465.82	1517.6
HSP90AB1	P08238	HS90B_HUMAN	Heat shock protein HSP 90-beta OS=Homo sapiens OX=9606 GN=HSP90AB1 PE=1 SV=4	4.77	83606.5	6250.75	27	48.76	1221.99	1205.06	717.714	651.873	396.332	407.912	1281.02	1167.25	562.648	565.898	817.77
HSPA2	P54652	HSP72_HUMAN	Heat shock-related 70 kDa protein 2 OS=Homo sapiens OX=9606 GN=HSPA2 PE=1 SV=1	5.42	70306.2	10438.3	29	59.47	3700.77	3487.14	3683.11	3463.88	3510.03	3656.36	3451.51	3128.57	4170.08	4080.16	3633.16
HMOX2	P30519	HMOX2_HUMAN	Heme oxygenase 2 OS=Homo sapiens OX=9606 GN=HMOX2 PE=1 SV=2	5.15	36204	827.332	9	41.46	116.312	149.141	149.658	154.186	121.922	115.851	131.188	120.675	97.4558	127.459	128.385
HEBP1	Q9NRV9	HEBP1_HUMAN	Heme-binding protein 1 OS=Homo sapiens OX=9606 GN=HEBP1 PE=1 SV=1	5.53	21211.2	939.716	7	61.38	60.9141	66.8472	86.1487	92.8029	74.3727	83.6415	58.0363	63.6388	144.518	126.836	85.7756
HEPACAM	Q14CZ8	HECAM_HUMAN	Hepatocyte cell adhesion molecule OS=Homo sapiens OX=9606 GN=HEPACAM PE=1 SV=1	9.5	46254.6	2408.82	13	35.58	742.63	673.125	1660.44	1716.92	1071.62	962.11	1206.15	1340.33	599.856	735.596	1070.88
HNRNPA1	P09651	ROA1_HUMAN	Heterogeneous nuclear ribonucleoprotein A1 OS=Homo sapiens OX=9606 GN=HNRNPA1 PE=1 SV=5	9.45	38860.8	485.805	5	20.43	141.698	207.781	83.9084	69.7537		47.0454	107.277	158.102		62.4881	109.757
HNRNPA2B1	P22626	ROA2_HUMAN	Heterogeneous nuclear ribonucleoproteins A2/B1 OS=Homo sapiens OX=9606 GN=HNRNPA2B1 PE=1 SV=2	9.27	37486.8	2063.55	9	43.63	887.166	571.387	663.203	575.213	646.141	562.462	540.028	523.551	685.127	433.78	608.806
HNRNPC	P07910	HNRPC_HUMAN	Heterogeneous nuclear ribonucleoproteins C1/C2 OS=Homo sapiens OX=9606 GN=HNRNPC PE=1 SV=4	4.76	33727.1	424.64	2	9.15	155.273	113.296	66.6818	65.5443			35.4394	41.1948	58.5223	45.4468	72.6748
HK1	P19367	HXK1_HUMAN	Hexokinase-1 OS=Homo sapiens OX=9606 GN=HK1 PE=1 SV=3	6.38	103627	2679.05	32	46.89	1804.82	1608.88	1947.2	1873.23	1581.14	1457.94	2364.41	2129.65	1186.4	1344.9	1729.86
HPCAL4	Q9UM19	HPCL4_HUMAN	Hippocalcin-like protein 4 OS=Homo sapiens OX=9606 GN=HPCAL4 PE=1 SV=3	4.56	22373.5	506.198	5	29.32	21.5625	21.9445	23.659	21.1321	9.60459	17.1282	38.817	40.5307	8.5505	9.47189	21.2401
HINT3	Q9NQE9	HINT3_HUMAN	Histidine triad nucleotide-binding protein 3 OS=Homo sapiens OX=9606 GN=HINT3 PE=1 SV=1	6.17	20817.5	1992.16	5	43.41	105.342	117.831	117.784	125.315	120.974	118.362	114.049	125.483	173.752	185.4	130.429
HDAC11	Q96DB2	HDA11_HUMAN	Histone deacetylase 11 OS=Homo sapiens OX=9606 GN=HDAC11 PE=1 SV=1	7.53	39297.2	1464.72	10	34.58	430.113	393.241	701.903	690.382	789.768	838.446	588.636	520.845	902.644	719.996	657.597
H1-0	P07305	H10_HUMAN	Histone H1.0 OS=Homo sapiens OX=9606 GN=H1-0 PE=1 SV=3	11.59	20863	644.776	2	10.82	105.197	92.6842	117.531	103.447	51.2354	51.6295	33.9275		68.4758	61.3924	76.1689
H1-4	P10412	H14_HUMAN	Histone H1.4 OS=Homo sapiens OX=9606 GN=H1-4 PE=1 SV=2	11.79	21865.3	4261.81	4	24.66	577.27	812.798	968.673	969.096	519.79	392.443	280.082	239.522	680.497	701.292	614.146
HIST1H1T	P22492	H1T_HUMAN	Histone H1t OS=Homo sapiens OX=9606 GN=HIST1H1T PE=2 SV=4	12.27	22019	2046.96	2	13.53	57.957	57.6973	60.072	55.7552	48.561	30.916	28.021	27.0476	63.4277	51.2584	48.0713
H3-3A	P84243	H33_HUMAN	Histone H3.3 OS=Homo sapiens OX=9606 GN=H3-3A PE=1 SV=2	11.81	15385	13885.9	6	47.06	290.402	351.958	160.651	262.057	82.6248	86.0621	45.1368	65.7261	92.8632	161.561	159.904
H3F3C	Q6NXT2	H3C_HUMAN	Histone H3.3C OS=Homo sapiens OX=9606 GN=H3F3C PE=1 SV=3	11.66	15327.8	2171.17	4	24.44	337.815	467.296	352.829	513.509	249.459	396.137	180.777	328.321	316.318	527.26	366.972
H4C1	P62805	H4_HUMAN	Histone H4 OS=Homo sapiens OX=9606 GN=H4C1 PE=1 SV=2	11.89	11367.4	18802.9	7	59.22	935.147	889.713	845.893	875.446	519.272	512.609	387.746	372.413	667.542	707.519	671.33
LIPE	Q05469	LIPS_HUMAN	Hormone-sensitive lipase OS=Homo sapiens OX=9606 GN=LIPE PE=1 SV=4	6.27	117396	798.913	20	31.88	730.979	620.011	687.306	713.351	549.601	648.147	674.91	676.628	512.353	684.318	649.76
HRNR	Q86YZ3	HORN_HUMAN	Hornerin OS=Homo sapiens OX=9606 GN=HRNR PE=1 SV=2	10.22	283303	1913.76	21	15.4	4663.48	10335.6	4574.04	7993.85	758.85	2415.09	4588.8	8244.03	2560.03	6792.9	5292.67
HAPLN2	Q9GZV7	HPLN2_HUMAN	Hyaluronan and proteoglycan link protein 2 OS=Homo sapiens OX=9606 GN=HAPLN2 PE=2 SV=1	8.88	38402.4	3102.29	11	40.29	1406.4	1287.19	407.094	387.599	392.439	440.985	802.008	741.253	862.522	819.251	754.674
HADH	Q16836	HCDH_HUMAN	Hydroxyacyl-coenzyme A dehydrogenase_ mitochondrial OS=Homo sapiens OX=9606 GN=HADH PE=1 SV=3	9.44	34350.6	262.528	3	14.65	107.662	85.0687	149.432	126.205	62.8891	68.8398	111.098	124.326	68.4134	67.5055	97.1439
HAGH	Q16775	GLO2_HUMAN	Hydroxyacylglutathione hydrolase_ mitochondrial OS=Homo sapiens OX=9606 GN=HAGH PE=1 SV=2	8.09	34262.1	959.834	8	33.12	323.437	275.387	395.56	414.946	653.829	637.123	225.231	231.529	263.316	236.799	365.716
IGHG2	P01859	IGHG2_HUMAN	Immunoglobulin heavy constant gamma 2 OS=Homo sapiens OX=9606 GN=IGHG2 PE=1 SV=2	7.45	36528	2193.7	8	36.5	139.307	142.228	385.651	377.24	258.153	286.168	381.882	334.364	84.4678	72.1451	246.161
IGHG3	P01860	IGHG3_HUMAN	Immunoglobulin heavy constant gamma 3 OS=Homo sapiens OX=9606 GN=IGHG3 PE=1 SV=2	7.79	42313.5	2018.77	9	31.56	359.686	323.543	888.428	695.523	486.664	540.358	644.45	748.212	676.332	1232.82	659.601
IGKC	P01834	IGKC_HUMAN	Immunoglobulin kappa constant OS=Homo sapiens OX=9606 GN=IGKC PE=1 SV=2	6.13	11936.1	6144.72	5	85.98	85.4234	80.6898	256.714	251.048	143.581	146.597	239.845	229.557	96.6491	56.7578	158.686
IGSF8	Q969P0	IGSF8_HUMAN	Immunoglobulin superfamily member 8 OS=Homo sapiens OX=9606 GN=IGSF8 PE=1 SV=1	7.9	65661.6	5810.33	20	50.73	1574.57	1494.93	1925.99	1835.28	2666.77	2420.19	1592.89	1592.68	3964.44	3995.22	2306.3
KPNB1	Q14974	IMB1_HUMAN	Importin subunit beta-1 OS=Homo sapiens OX=9606 GN=KPNB1 PE=1 SV=2	4.49	98482	369.891	8	11.76	360.052	354.095	297.406	264.465	167.66	186.023	411.068	377.735	159.322	160.676	273.85
INF2	Q27J81	INF2_HUMAN	Inverted formin-2 OS=Homo sapiens OX=9606 GN=INF2 PE=1 SV=2	5.09	136936	1821.01	36	47.32	1087.22	1064.38	1429.79	1853.31	1016.59	925.578	1657.67	1558.32	1391.18	2065.21	1404.92
IDH3A	P50213	IDH3A_HUMAN	Isocitrate dehydrogenase [NAD] subunit alpha_ mitochondrial OS=Homo sapiens OX=9606 GN=IDH3A PE=1 SV=1	6.52	40048	433.559	7	20.22	255.335	223.631	209.958	202.224	96.9066	100.571	235.298	227.515	59.7647	170.492	178.17
IDH3B	O43837	IDH3B_HUMAN	Isocitrate dehydrogenase [NAD] subunit beta_ mitochondrial OS=Homo sapiens OX=9606 GN=IDH3B PE=1 SV=2	8.61	42468.9	1237.72	5	33.25	183.35	191.084	176.812	175.051	170.736	159.821	191.174	153.336	159.487	167.331	172.818
IDH3G	P51553	IDH3G_HUMAN	Isocitrate dehydrogenase [NAD] subunit gamma_ mitochondrial OS=Homo sapiens OX=9606 GN=IDH3G PE=1 SV=1	8.58	43193.6	639.269	8	34.61	277.964	265.759	262.242	238.43	232.627	257.554	209.554	248.765	235.334	187.727	241.596
IDH2	P48735	IDHP_HUMAN	Isocitrate dehydrogenase [NADP]_ mitochondrial OS=Homo sapiens OX=9606 GN=IDH2 PE=1 SV=2	8.91	51365.6	2811.36	20	57.3	774.114	833.394	860.43	785.701	710.347	696.519	849.359	832.248	827.244	870.944	804.03
JUP	P14923	PLAK_HUMAN	Junction plakoglobin OS=Homo sapiens OX=9606 GN=JUP PE=1 SV=3	5.73	82486.3	2787.3	27	47.65	973.896	1932.43	857.987	925.836	1428.14	1526.92	1296.17	2319.19	1401.66	2316.37	1497.86
JAM3	Q9BX67	JAM3_HUMAN	Junctional adhesion molecule C OS=Homo sapiens OX=9606 GN=JAM3 PE=1 SV=1	7.46	35590.3	6347.07	11	50.97	388.504	323.142	1077.53	1019.56	873.954	881.232	684.842	824.288	992.983	967.977	803.4
KLK6	Q92876	KLK6_HUMAN	Kallikrein-6 OS=Homo sapiens OX=9606 GN=KLK6 PE=1 SV=1	7.18	27540.1	567.294	4	26.64	31.26	25.9966	86.3398	81.7438	69.448	59.9239	70.3843	65.0987	101.214	99.3131	69.0723
KBTBD11	O94819	KBTBB_HUMAN	Kelch repeat and BTB domain-containing protein 11 OS=Homo sapiens OX=9606 GN=KBTBD11 PE=1 SV=1	5.71	66746.4	387.7	5	12.2	223.488	204.891	180.122	160.004	128.933	132.208	243.127	254.804	96.9213	104.93	172.943
CRYM	Q14894	CRYM_HUMAN	Ketimine reductase mu-crystallin OS=Homo sapiens OX=9606 GN=CRYM PE=1 SV=1	4.88	33946.7	692.209	7	28.34	172.016	169.063	226.938	216.819	79.5518	78.0505	107.931	98.9728	118.033	91.3499	135.873
FN3KRP	Q9HA64	KT3K_HUMAN	Ketosamine-3-kinase OS=Homo sapiens OX=9606 GN=FN3KRP PE=1 SV=2	6.98	34640.4	359.635	2	10.68	151.589	106.6	173.95	191.135	205.601	214.872	219.748	207.01	278.5	141.381	189.039
KIF5A	Q12840	KIF5A_HUMAN	Kinesin heavy chain isoform 5A OS=Homo sapiens OX=9606 GN=KIF5A PE=1 SV=2	5.56	118234	1063.14	13	18.02	559.2	534.703	340.021	343.678	286.63	285.576	432.984	367.215	360.669	391.609	390.229
KIF5C	O60282	KIF5C_HUMAN	Kinesin heavy chain isoform 5C OS=Homo sapiens OX=9606 GN=KIF5C PE=1 SV=1	5.81	110065	1197.54	19	27.48	362.318	355.22	156.751	154.025	153.099	142.606	274.596	246.382	172.041	166.292	218.333
KLC1	Q07866	KLC1_HUMAN	Kinesin light chain 1 OS=Homo sapiens OX=9606 GN=KLC1 PE=1 SV=2	5.82	65822.9	538.363	9	19.02	296.743	265.338	115.881	121.594	94.3449	97.1886	195.243	183.739	120.48	135.061	162.561
KLC2	Q9H0B6	KLC2_HUMAN	Kinesin light chain 2 OS=Homo sapiens OX=9606 GN=KLC2 PE=1 SV=1	6.78	69333.9	452.979	3	6.43	92.363	89.136	43.2247	47.8135		27.6909	62.8526	74.4238		37.8801	59.4231
KIF5B	P33176	KINH_HUMAN	Kinesin-1 heavy chain OS=Homo sapiens OX=9606 GN=KIF5B PE=1 SV=1	6.1	110426	969.39	14	21.7	266.731	260.126	140.957	159.733	152.627	161.294	226.116	212.669	183.364	190.209	195.383
KIF21A	Q7Z4S6	KI21A_HUMAN	Kinesin-like protein KIF21A OS=Homo sapiens OX=9606 GN=KIF21A PE=1 SV=2	6.02	188491	330.384	13	16.13	1003.73	980.525	718.147	716.176	698.641	776.67	890.735	957.876	443.828	667.897	785.422
KIF2A	O00139	KIF2A_HUMAN	Kinesin-like protein KIF2A OS=Homo sapiens OX=9606 GN=KIF2A PE=1 SV=3	6.28	80639	269.051	4	7.37	224.011	212.655	202.654	172.731	218.448	218.639	236.062	233.061	219.015	211.686	214.896
LANCL2	Q9NS86	LANC2_HUMAN	LanC-like protein 2 OS=Homo sapiens OX=9606 GN=LANCL2 PE=1 SV=1	7.17	51709.8	1232.07	12	38	328.976	305.958	350.63	356.877	321.69	366.886	329.013	294.101	427.818	447.209	352.916
LLGL1	Q15334	L2GL1_HUMAN	Lethal(2) giant larvae protein homolog 1 OS=Homo sapiens OX=9606 GN=LLGL1 PE=1 SV=3	5.87	116730	1705.44	30	43.8	1794.26	1560.29	2135.3	2045.32	3438.79	3459.4	3275.45	3028.42	2001.98	1963	2470.22
LGI1	O95970	LGI1_HUMAN	Leucine-rich glioma-inactivated protein 1 OS=Homo sapiens OX=9606 GN=LGI1 PE=1 SV=1	8.21	64559.4	463.339	4	8.62	122.951	132.06	188.633	164.662	224.54	217.572	167.167	165.686	219.331	209.685	181.229
LGI3	Q8N145	LGI3_HUMAN	Leucine-rich repeat LGI family member 3 OS=Homo sapiens OX=9606 GN=LGI3 PE=2 SV=1	7.82	62445.9	3178.84	18	39.6	684.405	617.426	574.629	627.411	796.487	849.644	565.709	568.699	835.778	828.093	694.828
CD47	Q08722	CD47_HUMAN	Leukocyte surface antigen CD47 OS=Homo sapiens OX=9606 GN=CD47 PE=1 SV=1	7	35612.9	772.598	2	5.88	1219.05	1258.92	1901.48	1923.63	1887.39	1960.14	1577.46	1585.62	1693.58	1753.87	1676.11
LSAMP	Q13449	LSAMP_HUMAN	Limbic system-associated membrane protein OS=Homo sapiens OX=9606 GN=LSAMP PE=1 SV=2	6.62	37906.8	4430.72	8	32.25	250.669	247.281	532.067	515.738	463.011	433.331	409.913	384.687	409.051	430.824	407.657
LDHA	P00338	LDHA_HUMAN	L-lactate dehydrogenase A chain OS=Homo sapiens OX=9606 GN=LDHA PE=1 SV=2	8.38	36973.9	2970.26	12	55.42	304.058	268.442	225.927	212.6	257.841	247.338	414.399	437.086	322.218	376.317	306.623
LDHB	P07195	LDHB_HUMAN	L-lactate dehydrogenase B chain OS=Homo sapiens OX=9606 GN=LDHB PE=1 SV=2	5.66	36923.7	2895.45	12	40.12	477.113	453.258	369.727	346.772	321.964	299.999	539.441	557.951	486.819	518.337	437.138
LYNX1	P0DP58	LYNX1_HUMAN	Ly-6/neurotoxin-like protein 1 OS=Homo sapiens OX=9606 GN=LYNX1 PE=1 SV=1	7.72	13211.3	6321.27	3	25.86	269.151	245.547	391.9	414.445	466.742	435.277	318.971	299.949	388.551	377.98	360.851
LY6H	O94772	LY6H_HUMAN	Lymphocyte antigen 6H OS=Homo sapiens OX=9606 GN=LY6H PE=1 SV=1	7	15296.4	1187.48	4	27.86	34.2052	31.5648	53.7588	62.6551	64.5251	69.9887	50.4535	45.3151	57.2653	65.3552	53.5087
LPAR1	Q92633	LPAR1_HUMAN	Lysophosphatidic acid receptor 1 OS=Homo sapiens OX=9606 GN=LPAR1 PE=1 SV=3	8.49	41736.8	453.626	2	6.04	73.8303	88.0384	151.875	156.564	156.07	174.825	77.3845	75.5549	139.611	181.681	127.543
SCARB2	Q14108	SCRB2_HUMAN	Lysosome membrane protein 2 OS=Homo sapiens OX=9606 GN=SCARB2 PE=1 SV=2	4.82	54746.5	362.764	3	11.09	139.718	132.04	211.854	183.593	124.362	122.868	128.085	148.478	205.715	170.772	156.748
LAMP2	P13473	LAMP2_HUMAN	Lysosome-associated membrane glycoprotein 2 OS=Homo sapiens OX=9606 GN=LAMP2 PE=1 SV=2	5.24	45531.1	286.123	5	13.66	160.127	164.652	424.629	490.04	208.924	276.26	370.586	270.58	337.322	265.679	296.88
MPP2	Q14168	MPP2_HUMAN	MAGUK p55 subfamily member 2 OS=Homo sapiens OX=9606 GN=MPP2 PE=1 SV=3	6.35	64923.2	855.616	14	35.59	206.914	206.182	218.491	241.589	417.335	376.212	189.897	159.858	260.388	212.829	248.97
MPP6	Q9NZW5	MPP6_HUMAN	MAGUK p55 subfamily member 6 OS=Homo sapiens OX=9606 GN=MPP6 PE=1 SV=2	5.79	61402.2	322.79	2	4.07	4251.27	3430.37	4469.57	3523.97	5120.2	4026.45	4155.79	2960.82	5084.33	4628.44	4165.12
PRNP	P04156	PRIO_HUMAN	Major prion protein OS=Homo sapiens OX=9606 GN=PRNP PE=1 SV=1	9.23	27889.4	5883.75	4	16.21	573.712	492.09	921.864	977.006	1043.71	1128.32	858.993	855.202	1527.9	1500.87	987.965
MVP	Q14764	MVP_HUMAN	Major vault protein OS=Homo sapiens OX=9606 GN=MVP PE=1 SV=4	5.19	99612.1	595.032	19	31.58	347.529	343.868	622.47	508.624	497.939	446.991	407.029	387.983	587.759	527.33	467.752
MDH1	P40925	MDHC_HUMAN	Malate dehydrogenase_ cytoplasmic OS=Homo sapiens OX=9606 GN=MDH1 PE=1 SV=4	7.19	36654.3	3610.87	12	45.21	612.702	506.813	393.003	366.844	422.534	413.397	500.459	487.003	745.721	763.801	521.228
MDH2	P40926	MDHM_HUMAN	Malate dehydrogenase_ mitochondrial OS=Homo sapiens OX=9606 GN=MDH2 PE=1 SV=3	8.86	35959.6	12157.7	15	57.1	1228.23	1357.47	1242.61	1376.68	709.565	767.505	1297.42	1427.72	1002.55	1032.93	1144.27
MAP6D1	Q9H9H5	MA6D1_HUMAN	MAP6 domain-containing protein 1 OS=Homo sapiens OX=9606 GN=MAP6D1 PE=1 SV=1	10.6	21175.6	3318.29	11	69.85	134.479	133.649	290.496	289.278	188.909	175.851	143.495	105.057	283.491	260.307	200.501
MARCKSL1	P49006	MRP_HUMAN	MARCKS-related protein OS=Homo sapiens OX=9606 GN=MARCKSL1 PE=1 SV=2	4.45	19585.8	2447.94	6	72.31	113.307	49.6417	111.103	78.0375	120.122	102.08	114.687	59.1852	209.731	192.377	115.027
PGRMC1	O00264	PGRC1_HUMAN	Membrane-associated progesterone receptor component 1 OS=Homo sapiens OX=9606 GN=PGRMC1 PE=1 SV=3	4.34	21785.2	2664.64	4	37.44	291.511	292.154	235.301	242.728	191.47	169.311	283.123	271.937	207.38	173.025	235.794
MBLAC2	Q68D91	MBLC2_HUMAN	Metallo-beta-lactamase domain-containing protein 2 OS=Homo sapiens OX=9606 GN=MBLAC2 PE=1 SV=3	6.48	31542.6	1192.57	11	46.24	279.11	260.024	378.127	363.204	381.703	149.584	302.455	95.0189	172.293	368.937	275.046
METAP2	P50579	MAP2_HUMAN	Methionine aminopeptidase 2 OS=Homo sapiens OX=9606 GN=METAP2 PE=1 SV=1	5.47	53747.1	347.604	2	4.39	18285.1	17804.3	29863.5	19266.5	31361.8	19393.6	18027.4	20574.3	29537.5	20627.9	22474.2
ALDH6A1	Q02252	MMSA_HUMAN	Methylmalonate-semialdehyde dehydrogenase [acylating]_ mitochondrial OS=Homo sapiens OX=9606 GN=ALDH6A1 PE=1 SV=2	8.61	58296.1	4303.01	21	61.68	1001.33	940.116	2339.96	2532.64	1400.86	1386.38	1338.12	1612.22	990.132	1218.46	1476.02
CHCHD3	Q9NX63	MIC19_HUMAN	MICOS complex subunit MIC19 OS=Homo sapiens OX=9606 GN=CHCHD3 PE=1 SV=1	8.38	26437.5	403.127	2	13.66	69.4923	70.5194	80.0147	86.3803	40.0718	39.7233	81.9405	71.8689	40.7448	39.3563	62.0112
APOO	Q9BUR5	MIC26_HUMAN	MICOS complex subunit MIC26 OS=Homo sapiens OX=9606 GN=APOO PE=1 SV=1	9.49	22398.7	510.799	3	23.23	76.5716	74.5363	99.5284	85.2561	60.1625	65.4566	79.3098	94.6023	41.3087	34.1679	71.09
IMMT	Q16891	MIC60_HUMAN	MICOS complex subunit MIC60 OS=Homo sapiens OX=9606 GN=IMMT PE=1 SV=1	6.07	84077.2	738.438	17	27.18	524.262	3237.57	568.118	1464.76	393.836	384.281	591.138	579.592	301.461	316.069	836.109
MGST3	O14880	MGST3_HUMAN	Microsomal glutathione S-transferase 3 OS=Homo sapiens OX=9606 GN=MGST3 PE=1 SV=1	9.67	16744.4	2415.63	3	33.55	166.4	138.335	154.528	150.047	95.6862	84.0728	186.644	139.667	122.338	136.702	137.442
MAP1A	P78559	MAP1A_HUMAN	Microtubule-associated protein 1A OS=Homo sapiens OX=9606 GN=MAP1A PE=1 SV=6	4.66	306968	1254.08	50	28.18	5675.73	5269.83	3736.24	4055.43	2935.4	3632.66	4811.3	4963.37	4050.11	5019.82	4414.99
MAP1B	P46821	MAP1B_HUMAN	Microtubule-associated protein 1B OS=Homo sapiens OX=9606 GN=MAP1B PE=1 SV=2	4.54	271832	5232.01	87	58.91	15498.1	14114.5	10603.4	10425.4	10913.8	11125.4	13633.4	12491	12019.4	10474.4	12129.9
MAP4	P27816	MAP4_HUMAN	Microtubule-associated protein 4 OS=Homo sapiens OX=9606 GN=MAP4 PE=1 SV=3	5.14	121518	367.123	12	18.92	556.481	567.507	571.468	629.337	421.266	546.398	604.349	611.6	520.798	525.819	555.502
MAP6	Q96JE9	MAP6_HUMAN	Microtubule-associated protein 6 OS=Homo sapiens OX=9606 GN=MAP6 PE=1 SV=2	9.79	86733.5	411.056	8	19.19	397.117	366.805	212.67	183.099	207.354	191.384	257.762	223.412	313.224	314.85	266.768
MAPRE1	Q15691	MARE1_HUMAN	Microtubule-associated protein RP/EB family member 1 OS=Homo sapiens OX=9606 GN=MAPRE1 PE=1 SV=3	4.83	30170.2	784.987	9	42.54	113.029	109.63	145.832	130.814	90.6303	68.0802	122.977	99.7248	117.035	116.12	111.387
MAPRE2	Q15555	MARE2_HUMAN	Microtubule-associated protein RP/EB family member 2 OS=Homo sapiens OX=9606 GN=MAPRE2 PE=1 SV=1	5.24	37259.5	2863.48	15	65.14	691.939	700.284	416.25	489.101	410.34	440.347	602.996	583.167	364.25	380.433	507.911
MAPRE3	Q9UPY8	MARE3_HUMAN	Microtubule-associated protein RP/EB family member 3 OS=Homo sapiens OX=9606 GN=MAPRE3 PE=1 SV=1	5.2	32267.4	1092.06	11	44.84	155.658	128.577	90.0653	95.6828	100.884	90.854	159.907	140.427	109.364	125.369	119.679
MAPT	P10636	TAU_HUMAN	Microtubule-associated protein tau OS=Homo sapiens OX=9606 GN=MAPT PE=1 SV=5	6.28	79155.8	2301.69	18	38.26	1745.57	1396.98	1561.48	1597.69	2123.14	1419.51	1779.8	1496.98	2311.4	1501.63	1693.42
MAP1LC3A	Q9H492	MLP3A_HUMAN	Microtubule-associated proteins 1A/1B light chain 3A OS=Homo sapiens OX=9606 GN=MAP1LC3A PE=1 SV=2	9.17	14329.5	1652.84	3	23.14	233.517	189.781	170.263	172.315	151.298	132.953	180.427	222.536	198.97	234.22	188.628
SLC25A11	Q02978	M2OM_HUMAN	Mitochondrial 2-oxoglutarate/malate carrier protein OS=Homo sapiens OX=9606 GN=SLC25A11 PE=1 SV=3	10.39	34232.9	4099.02	10	39.17	249.786	253.687	168.249	219.351	199.783	176.148	273.009	220.978	154.314	168.415	208.372
MTCH2	Q9Y6C9	MTCH2_HUMAN	Mitochondrial carrier homolog 2 OS=Homo sapiens OX=9606 GN=MTCH2 PE=1 SV=1	7.89	33958.3	467.78	5	29.7	110.443	89.5706	102.486	140.899	162.996	156.675	154.365	101.105	99.1576	157.583	127.528
FIS1	Q9Y3D6	FIS1_HUMAN	Mitochondrial fission 1 protein OS=Homo sapiens OX=9606 GN=FIS1 PE=1 SV=2	9.29	16994.8	2239.05	5	36.18	74.8238	71.7938	90.6394	82.9307	68.0853	64.9943	72.8688	70.7283	112.47	104.575	81.3909
SLC25A22	Q9H936	GHC1_HUMAN	Mitochondrial glutamate carrier 1 OS=Homo sapiens OX=9606 GN=SLC25A22 PE=1 SV=1	9.66	34926.5	1278.24	7	39.63	167.6	153.223	299.567	268.309	140.875	122.558	244.835	254.818	147.941	164.307	196.403
TOMM70	O94826	TOM70_HUMAN	Mitochondrial import receptor subunit TOM70 OS=Homo sapiens OX=9606 GN=TOMM70 PE=1 SV=1	6.8	68139.3	399.95	6	15.46	168.192	169.768	149.125	208.175	129.626	124.507	190.338	210.153	122.451	153.378	162.571
MAPK1	P28482	MK01_HUMAN	Mitogen-activated protein kinase 1 OS=Homo sapiens OX=9606 GN=MAPK1 PE=1 SV=3	6.57	41789	2009.41	16	57.5	373.028	402.996	421.178	499.129	527.968	391.379	388.588	465.547	435.419	514.32	441.955
MAPK3	P27361	MK03_HUMAN	Mitogen-activated protein kinase 3 OS=Homo sapiens OX=9606 GN=MAPK3 PE=1 SV=4	6.32	43477.8	1609.02	11	40.9	140.225	136.959	112.301	115.401	149.92	139.733	172.977	169.081	118.044	163.917	141.856
MSN	P26038	MOES_HUMAN	Moesin OS=Homo sapiens OX=9606 GN=MSN PE=1 SV=3	6.03	67934.2	5843.56	32	63.78	1270.04	1369.12	2385.22	2783.94	1426.6	1555.15	1590.37	1714.49	2412.94	3041.72	1954.96
PAICS	P22234	PUR6_HUMAN	Multifunctional protein ADE2 OS=Homo sapiens OX=9606 GN=PAICS PE=1 SV=3	6.99	47820.6	688.296	4	17.88	183.435	188.753	104.774	84.1928	130.794	90.4592	129.163	108.612	135.455	205.546	136.118
BIN1	O00499	BIN1_HUMAN	Myc box-dependent-interacting protein 1 OS=Homo sapiens OX=9606 GN=BIN1 PE=1 SV=1	4.79	64927.6	4684.34	15	41.82	1702.14	1475.57	2767.46	2856.04	2044.39	1779	2143.6	1761.04	2386.9	2344.07	2126.02
ABHD10	Q9NUJ1	ABHDA_HUMAN	Mycophenolic acid acyl-glucuronide esterase_ mitochondrial OS=Homo sapiens OX=9606 GN=ABHD10 PE=1 SV=1	8.72	34274.7	494.44	4	18.63	68.3622	76.7572	69.7055	73.5247	37.7207	44.4764	84.0718	83.3205	94.3456	55.1284	68.7413
MBP	P02686	MBP_HUMAN	Myelin basic protein OS=Homo sapiens OX=9606 GN=MBP PE=1 SV=3	10.45	33117.1	12539.2	15	53.95	21473.7	20106.7	21998.4	20716.7	21716.3	22804.3	19226.1	18426.7	22348.2	26468.8	21528.6
PMP2	P02689	MYP2_HUMAN	Myelin P2 protein OS=Homo sapiens OX=9606 GN=PMP2 PE=1 SV=3	10.54	15023.5	20924.5	11	70.45	2027.55	2090.82	1341.93	1334.01	1581.46	1426.23	1654.13	1552.83	2388.59	2423.63	1782.12
MPZ	P25189	MYP0_HUMAN	Myelin protein P0 OS=Homo sapiens OX=9606 GN=MPZ PE=1 SV=1	10	27725.9	447.822	2	9.68			170.629	182.641							176.635
PLP1	P60201	MYPR_HUMAN	Myelin proteolipid protein OS=Homo sapiens OX=9606 GN=PLP1 PE=1 SV=2	8.29	30875.6	16100.3	12	38.63	19167.9	18444.1	21961.5	21465.3	21903.4	21064.4	23079.4	21420.9	23575.3	27851.6	21993.4
MAG	P20916	MAG_HUMAN	Myelin-associated glycoprotein OS=Homo sapiens OX=9606 GN=MAG PE=1 SV=1	4.79	69924	8793.79	17	39.62	7691.33	7294.02	8104.76	8841.1	10727.9	10206.7	6909.15	7213.56	9101.65	9311.65	8540.18
MOBP	Q13875	MOBP_HUMAN	Myelin-associated oligodendrocyte basic protein OS=Homo sapiens OX=9606 GN=MOBP PE=1 SV=2	11.88	21358.2	7806.96	4	23.5	1664.33	1675.19	2340.58	2551.25	2338.39	2315.24	1720.17	1552.76	2244.84	2766.19	2116.89
MOG	Q16653	MOG_HUMAN	Myelin-oligodendrocyte glycoprotein OS=Homo sapiens OX=9606 GN=MOG PE=1 SV=2	8.59	28592.3	13230.4	9	41.7	3585.22	4409.76	4269.19	4619.93	4819.29	5133.07	3563.81	4350.54	3799.08	5861.52	4441.14
MYADM	Q96S97	MYADM_HUMAN	Myeloid-associated differentiation marker OS=Homo sapiens OX=9606 GN=MYADM PE=1 SV=2	8.06	36072	10214.1	5	21.12	2075.86	1909.21	2651.83	2665.14	2908.73	2796.42	1789.31	1699.8	2811.63	2869.4	2417.73
MYL6B	P14649	MYL6B_HUMAN	Myosin light chain 6B OS=Homo sapiens OX=9606 GN=MYL6B PE=1 SV=1	5.43	22878.1	1085.11	3	24.52	37.3318	29.6374	41.0782	46.9367	42.114	45.4196	46.4249	35.1382	43.3983	37.6057	40.5085
MYL6	P60660	MYL6_HUMAN	Myosin light polypeptide 6 OS=Homo sapiens OX=9606 GN=MYL6 PE=1 SV=2	4.36	17101.2	2090.86	6	47.68	111.121	71.6574	89.4559	133.994	97.7184	112.043	104.106	85.1652	108.197	88.9354	100.239
MYH10	P35580	MYH10_HUMAN	Myosin-10 OS=Homo sapiens OX=9606 GN=MYH10 PE=1 SV=3	5.28	229969	711.039	37	29.81	1202.64	1044.51	1282.97	1639.17	1353.15	1399.56	1219.58	1204.89	1140.24	1227.26	1271.4
MYH11	P35749	MYH11_HUMAN	Myosin-11 OS=Homo sapiens OX=9606 GN=MYH11 PE=1 SV=3	5.25	228195	641.366	10	6.54	489.683	433.117	574.912	645.082	477.72	521.925	477.663	530.578	938.492	1036.68	612.585
MYH14	Q7Z406	MYH14_HUMAN	Myosin-14 OS=Homo sapiens OX=9606 GN=MYH14 PE=1 SV=2	5.36	228840	887.234	37	30.33	854.603	761.138	959.326	992.641	1034.65	900.059	848.402	783.947	980.753	1272.98	938.85
MYH9	P35579	MYH9_HUMAN	Myosin-9 OS=Homo sapiens OX=9606 GN=MYH9 PE=1 SV=4	5.34	227787	538.404	32	24.49	2414.96	1663.19	2241.24	2430.27	2849.14	2748.79	1600.56	2244.96	2495.99	2447.2	2313.63
MARCKS	P29966	MARCS_HUMAN	Myristoylated alanine-rich C-kinase substrate OS=Homo sapiens OX=9606 GN=MARCKS PE=1 SV=4	4.26	31725.8	881.106	5	30.12	128.285	66.8868	167.284	114.719	104.989	87.0177	152.919	86.8652	104.737	87.8886	110.159
DDAH1	O94760	DDAH1_HUMAN	N(G)_N(G)-dimethylarginine dimethylaminohydrolase 1 OS=Homo sapiens OX=9606 GN=DDAH1 PE=1 SV=3	5.45	31464	610.705	3	22.46	61.3603	55.9556	91.3009	92.0389	77.897	87.9575	90.4259	84.7308	77.3741	65.2514	78.4293
DDAH2	O95865	DDAH2_HUMAN	N(G)_N(G)-dimethylarginine dimethylaminohydrolase 2 OS=Homo sapiens OX=9606 GN=DDAH2 PE=1 SV=1	5.61	29929	1204.2	8	53.33	118.808	113.651	66.8746	74.2158	92.2455	110.434	106.639	105.533	143.718	145.961	107.808
SLC9A3R1	O14745	NHRF1_HUMAN	Na(+)/H(+) exchange regulatory cofactor NHE-RF1 OS=Homo sapiens OX=9606 GN=SLC9A3R1 PE=1 SV=4	5.45	39153.6	597.272	2	9.5	46.5012		121.547	65.9519	63.6269		40.3447		120.163	42.3076	71.4918
NAPEPLD	Q6IQ20	NAPEP_HUMAN	N-acyl-phosphatidylethanolamine-hydrolyzing phospholipase D OS=Homo sapiens OX=9606 GN=NAPEPLD PE=1 SV=2	5.67	45937.7	624.206	7	25.95	87.7593	88.7058	155.271	117.429	149.837	150.668	127.149	122.035	185.391	137.936	132.218
NNT	Q13423	NNTM_HUMAN	NAD(P) transhydrogenase_ mitochondrial OS=Homo sapiens OX=9606 GN=NNT PE=1 SV=3	8.07	114637	687.039	21	27.72	935.862	863.571	1201.51	994.285	920.742	1146.58	1022.69	963.9	530.282	552.078	913.15
NQO1	P15559	NQO1_HUMAN	NAD(P)H dehydrogenase [quinone] 1 OS=Homo sapiens OX=9606 GN=NQO1 PE=1 SV=1	9.36	30924.7	489.121	2	18.98	111.11	105.451	38.8795	38.1653	109.011	89.769	35.8424	37.9972	83.3992	113.662	76.3287
SIRT2	Q8IXJ6	SIR2_HUMAN	NAD-dependent protein deacetylase sirtuin-2 OS=Homo sapiens OX=9606 GN=SIRT2 PE=1 SV=2	5.06	43809.5	29947.9	22	73.52	4521.84	4625.79	6615.55	6513.52	6519.28	6152.71	5525.83	5437.2	6862.68	7176.78	5995.12
NDUFA10	O95299	NDUAA_HUMAN	NADH dehydrogenase [ubiquinone] 1 alpha subcomplex subunit 10_ mitochondrial OS=Homo sapiens OX=9606 GN=NDUFA10 PE=1 SV=1	8.62	41092.8	866.928	9	29.01	474.512	358.443	320.548	274.306	196.417	183.648	392.759	271.357	195.24	127.104	279.433
NDUFA11	Q86Y39	NDUAB_HUMAN	NADH dehydrogenase [ubiquinone] 1 alpha subcomplex subunit 11 OS=Homo sapiens OX=9606 GN=NDUFA11 PE=1 SV=3	8.9	15080.2	530.531	2	26.95	38.4434	23.8943	37.9431	36.5389	23.6877	23.918	39.2095	28.9227	25.4887	23.5329	30.1579
NDUFA12	Q9UI09	NDUAC_HUMAN	NADH dehydrogenase [ubiquinone] 1 alpha subcomplex subunit 12 OS=Homo sapiens OX=9606 GN=NDUFA12 PE=1 SV=1	10.09	17114.5	1473.13	4	40	56.0309	54.0905	57.2898	76.8442	46.1725	40.7768	59.6798	55.6052	43.868	40.1417	53.0499
NDUFA13	Q9P0J0	NDUAD_HUMAN	NADH dehydrogenase [ubiquinone] 1 alpha subcomplex subunit 13 OS=Homo sapiens OX=9606 GN=NDUFA13 PE=1 SV=3	9.03	16698.4	1129.37	5	30.56	114.097	101.083	107.465	104.84	108.656	81.2065	96.7777	86.4078	96.7672	114.397	101.17
NDUFA2	O43678	NDUA2_HUMAN	NADH dehydrogenase [ubiquinone] 1 alpha subcomplex subunit 2 OS=Homo sapiens OX=9606 GN=NDUFA2 PE=1 SV=3	10.12	11035.6	1274.17	2	31.31	42.4312	38.931	36.8348	33.0487	24.1416	23.0331	33.9748	30.8081	25.8701	26.6911	31.5765
NDUFA5	Q16718	NDUA5_HUMAN	NADH dehydrogenase [ubiquinone] 1 alpha subcomplex subunit 5 OS=Homo sapiens OX=9606 GN=NDUFA5 PE=1 SV=3	5.67	13515.7	860.455	4	65.52	45.9402	38.9382	46.4363	42.2496	28.0715	25.769	45.0406	36.1163	32.7325	24.9074	36.6202
NDUFA6	P56556	NDUA6_HUMAN	NADH dehydrogenase [ubiquinone] 1 alpha subcomplex subunit 6 OS=Homo sapiens OX=9606 GN=NDUFA6 PE=1 SV=4	10.63	15136.6	843.615	3	27.34	46.547	42.5262	41.8959	44.1083	38.5758	33.79	40.2493	42.1791	31.9737	40.838	40.2683
NDUFA8	P51970	NDUA8_HUMAN	NADH dehydrogenase [ubiquinone] 1 alpha subcomplex subunit 8 OS=Homo sapiens OX=9606 GN=NDUFA8 PE=1 SV=3	7.55	20561.3	479.097	4	25	79.2036	68.4162	74.2335	56.6503	47.2825	55.3766	80.2341	81.0445	70.5415	46.1151	65.9098
NDUFA9	Q16795	NDUA9_HUMAN	NADH dehydrogenase [ubiquinone] 1 alpha subcomplex subunit 9_ mitochondrial OS=Homo sapiens OX=9606 GN=NDUFA9 PE=1 SV=2	10.36	42680.7	1167.91	11	37.67	264.685	255.177	227.829	250.189	220.904	203.082	243.043	248.529	178.501	235.731	232.767
NDUFB1	O75438	NDUB1_HUMAN	NADH dehydrogenase [ubiquinone] 1 beta subcomplex subunit 1 OS=Homo sapiens OX=9606 GN=NDUFB1 PE=1 SV=1	9.49	7018.25	1235.07	2	32.76	22.13	15.8952	15.6342	19.5678	11.1493	11.7585	11.4645	10.9837	11.7104	9.22882	13.9522
NDUFB10	O96000	NDUBA_HUMAN	NADH dehydrogenase [ubiquinone] 1 beta subcomplex subunit 10 OS=Homo sapiens OX=9606 GN=NDUFB10 PE=1 SV=3	8.61	21061.9	1303.77	5	45.93	129.002	126.211	115.323	134.912	98.0299	99.9527	137.267	124.069	118.576	112.261	119.56
NDUFB11	Q9NX14	NDUBB_HUMAN	NADH dehydrogenase [ubiquinone] 1 beta subcomplex subunit 11_ mitochondrial OS=Homo sapiens OX=9606 GN=NDUFB11 PE=1 SV=1	4.94	17373.7	1517.33	3	26.8	89.7891	89.8137	92.5945	91.0541	52.3874	49.7186	91.0855	83.368	65.2906	51.2115	75.6313
NDUFB7	P17568	NDUB7_HUMAN	NADH dehydrogenase [ubiquinone] 1 beta subcomplex subunit 7 OS=Homo sapiens OX=9606 GN=NDUFB7 PE=1 SV=4	9.23	16630.1	694.871	4	31.39	58.598	51.8747	55.5058	54.6565	44.3826	44.5791	56.5154	49.1048	48.7904	37.6563	50.1664
NDUFB9	Q9Y6M9	NDUB9_HUMAN	NADH dehydrogenase [ubiquinone] 1 beta subcomplex subunit 9 OS=Homo sapiens OX=9606 GN=NDUFB9 PE=1 SV=3	8.52	22059.1	707.575	8	50.28	99.411	92.4779	87.8071	86.7775	57.782	60.1652	87.7725	89.5789	69.512	71.81	80.3094
NDUFV1	P49821	NDUV1_HUMAN	NADH dehydrogenase [ubiquinone] flavoprotein 1_ mitochondrial OS=Homo sapiens OX=9606 GN=NDUFV1 PE=1 SV=4	8.16	51501.5	2063.72	17	53.88	1071.65	989.268	892.934	874.149	557.612	614.936	852.249	957.675	459.312	452.619	772.24
NDUFV2	P19404	NDUV2_HUMAN	NADH dehydrogenase [ubiquinone] flavoprotein 2_ mitochondrial OS=Homo sapiens OX=9606 GN=NDUFV2 PE=1 SV=2	8.1	27676.7	563.541	5	34.54	84.9455	185.611	131.487	85.3705	105.303	74.5727	165.976	66.2655	130.361	69.355	109.925
NDUFS2	O75306	NDUS2_HUMAN	NADH dehydrogenase [ubiquinone] iron-sulfur protein 2_ mitochondrial OS=Homo sapiens OX=9606 GN=NDUFS2 PE=1 SV=2	7.32	52945	729.085	12	40.39	276.509	289.469	268.815	270.408	215.537	160.247	273.281	262.871	173.716	210.963	240.182
NDUFS3	O75489	NDUS3_HUMAN	NADH dehydrogenase [ubiquinone] iron-sulfur protein 3_ mitochondrial OS=Homo sapiens OX=9606 GN=NDUFS3 PE=1 SV=1	7.38	30355.6	1423.44	14	61.74	234.437	232.695	210.829	225.299	152.286	158.29	180.336	159.544	203.048	193.507	195.027
NDUFS4	O43181	NDUS4_HUMAN	NADH dehydrogenase [ubiquinone] iron-sulfur protein 4_ mitochondrial OS=Homo sapiens OX=9606 GN=NDUFS4 PE=1 SV=1	11.01	20108	718.759	4	25.71	53.2562	45.8649	57.3273	48.8886	29.4	26.8857	49.688	45.708	30.5295	26.7741	41.4322
NDUFS5	O43920	NDUS5_HUMAN	NADH dehydrogenase [ubiquinone] iron-sulfur protein 5 OS=Homo sapiens OX=9606 GN=NDUFS5 PE=1 SV=3	9.55	12745.6	1066.08	5	49.06	587.492	504.667	652.11	567.273	704.373	522.639	567.788	568.578	772.605	685.586	613.311
NDUFS7	O75251	NDUS7_HUMAN	NADH dehydrogenase [ubiquinone] iron-sulfur protein 7_ mitochondrial OS=Homo sapiens OX=9606 GN=NDUFS7 PE=1 SV=3	10.34	23848.7	615.58	2	10.8	85.5128	90.6305	73.9381	74.5128	50.5182	46.5092	81.2055	75.8826	55.7977	55.1307	68.9638
NDUFS8	O00217	NDUS8_HUMAN	NADH dehydrogenase [ubiquinone] iron-sulfur protein 8_ mitochondrial OS=Homo sapiens OX=9606 GN=NDUFS8 PE=1 SV=1	5.97	24218.4	1436.79	5	29.05	148.427	135.746	145.557	134.764	77.2254	108.304	138.002	139.03	107.787	90.1456	122.499
CYB5R3	P00387	NB5R3_HUMAN	NADH-cytochrome b5 reductase 3 OS=Homo sapiens OX=9606 GN=CYB5R3 PE=1 SV=3	7.41	34463	3591.76	11	45.85	353.094	325.757	326.949	339.889	284.837	271.481	423.276	413.303	260.623	295.909	329.512
NDUFS1	P28331	NDUS1_HUMAN	NADH-ubiquinone oxidoreductase 75 kDa subunit_ mitochondrial OS=Homo sapiens OX=9606 GN=NDUFS1 PE=1 SV=3	5.84	80494.2	1647.19	27	56.95	1152.41	1165.98	1078.72	1093.71	618.939	639.199	1113.7	1160.06	684.974	555.569	926.326
ME3	Q16798	MAON_HUMAN	NADP-dependent malic enzyme_ mitochondrial OS=Homo sapiens OX=9606 GN=ME3 PE=2 SV=2	7.9	67695.9	252.715	2	6.29	157.13	133.823	144.073	140.785	97.995	64.3053	155.021	179.123	162.668	142.128	137.705
NECTIN1	Q15223	NECT1_HUMAN	Nectin-1 OS=Homo sapiens OX=9606 GN=NECTIN1 PE=1 SV=3	5.72	57500.4	434.401	6	23.02	138.675	144.312	280.154	247.638	250.969	258.247	181.119	250.272	318.326	332.455	240.217
NCAM1	P13591	NCAM1_HUMAN	Neural cell adhesion molecule 1 OS=Homo sapiens OX=9606 GN=NCAM1 PE=1 SV=3	4.6	95429.7	5787.92	27	50.12	2893.49	2656	4905.58	4367.72	4419.38	3870.72	3852.71	4245.19	4406.99	4705.34	4032.31
NCAM2	O15394	NCAM2_HUMAN	Neural cell adhesion molecule 2 OS=Homo sapiens OX=9606 GN=NCAM2 PE=1 SV=2	5.3	93844.8	347.656	11	16.25	235.287	192.399	377.045	410.1	351.057	352.525	313.624	313.993	270.848	294.124	311.1
NCALD	P61601	NCALD_HUMAN	Neurocalcin-delta OS=Homo sapiens OX=9606 GN=NCALD PE=1 SV=2	5.05	22359.4	1782.27	9	61.66	139.047	127.724	74.7311	73.5223	50.3638	39.8591	66.1548	63.1875	57.8523	49.1568	74.1598
NFASC	O94856	NFASC_HUMAN	Neurofascin OS=Homo sapiens OX=9606 GN=NFASC PE=1 SV=4	6.24	150882	3220.65	43	41.43	4057.49	3713.94	5855.59	5725.03	6300.13	5914.46	6380.47	6039.89	6219.63	6339.03	5654.57
NEFH	P12036	NFH_HUMAN	Neurofilament heavy polypeptide OS=Homo sapiens OX=9606 GN=NEFH PE=1 SV=4	5.89	112707	9984.16	34	39.18	17136.8	16214.8	8337.63	7724.57	5538.33	5151.01	13443.7	12490.9	5432.72	5456.37	9692.68
NEFL	P07196	NFL_HUMAN	Neurofilament light polypeptide OS=Homo sapiens OX=9606 GN=NEFL PE=1 SV=3	4.43	61573.7	34253.1	45	81.03	17528.7	18190.5	14597	13884.7	11258.3	12241	15140.6	15913.1	11787.1	11897.8	14243.9
NEFM	P07197	NFM_HUMAN	Neurofilament medium polypeptide OS=Homo sapiens OX=9606 GN=NEFM PE=1 SV=3	4.7	102529	17246.8	51	55.02	29967.8	31212.3	21812.3	22260.7	16604.1	16282.9	26160.2	25195.3	18516.2	18500.2	22651.2
NEGR1	Q7Z3B1	NEGR1_HUMAN	Neuronal growth regulator 1 OS=Homo sapiens OX=9606 GN=NEGR1 PE=1 SV=3	5.82	39403.5	950.157	5	22.32	263.637	119.936	251.463	261.89	237.036	222.335	262.172	228.383	214.138	193.583	225.457
GPM6A	P51674	GPM6A_HUMAN	Neuronal membrane glycoprotein M6-a OS=Homo sapiens OX=9606 GN=GPM6A PE=1 SV=2	5.01	31951	1248.88	6	20.5	214.5	193.764	373.945	401.656	525.762	523.56	344.087	343.1	447.275	476.711	384.436
GPM6B	Q13491	GPM6B_HUMAN	Neuronal membrane glycoprotein M6-b OS=Homo sapiens OX=9606 GN=GPM6B PE=1 SV=2	5.45	29901.3	2024.64	5	27.17	993.683	922.509	1220.45	935.809	1207.58	1337.67	1268.34	1064.6	1666.08	1784.84	1240.16
SEPTIN3	Q9UH03	SEPT3_HUMAN	Neuronal-specific septin-3 OS=Homo sapiens OX=9606 GN=SEPTIN3 PE=1 SV=3	6.85	40989.1	492.885	3	12.85	128.766	120.167	92.2668	95.0998	109.955	107.914	94.4362	92.5762	100.439	75.6185	101.724
NPTN	Q9Y639	NPTN_HUMAN	Neuroplastin OS=Homo sapiens OX=9606 GN=NPTN PE=1 SV=2	7.99	44729.4	434.317	4	14.57	304.301	275.172	301.621	331.504	370.976	398.916	278.361	248.873	403.993	437.187	335.091
NTM	Q9P121	NTRI_HUMAN	Neurotrimin OS=Homo sapiens OX=9606 GN=NTM PE=1 SV=1	7.73	38541.8	982.818	9	46.22	134.507	134.373	182.937	196.675	195.349	175.837	133.259	99.4622	158.88	141.196	155.248
GANAB	Q14697	GANAB_HUMAN	Neutral alpha-glucosidase AB OS=Homo sapiens OX=9606 GN=GANAB PE=1 SV=3	5.72	107330	279.36	3	6.46	127.906	117.327	154.091	143.079	111.318	99.3577	156.109	156.767			133.244
NINJ2	Q9NZG7	NINJ2_HUMAN	Ninjurin-2 OS=Homo sapiens OX=9606 GN=NINJ2 PE=1 SV=1	10.01	15680.3	10335.9	3	30.99	200.623	183.768	245.581	316.285	365.147	349.569	198.687	209.887	223.317	259.978	255.284
NPM1	P06748	NPM_HUMAN	Nucleophosmin OS=Homo sapiens OX=9606 GN=NPM1 PE=1 SV=2	4.45	32746.2	354.243	2	16.67	81.1472	94.099		51.6291				29.527			64.1006
NME1	P15531	NDKA_HUMAN	Nucleoside diphosphate kinase A OS=Homo sapiens OX=9606 GN=NME1 PE=1 SV=1	5.79	17319.8	9482.1	10	70.39	412.753	432.321	452.51	392.705	459.603	390.978	385.423	361.443	403.696	438.928	413.036
NME2	P22392	NDKB_HUMAN	Nucleoside diphosphate kinase B OS=Homo sapiens OX=9606 GN=NME2 PE=1 SV=1	8.75	17412.1	12804.5	11	75	542.184	580.238	651.619	543.326	762.741	661.979	559.566	518.58	618	637.019	607.525
NAP1L1	P55209	NP1L1_HUMAN	Nucleosome assembly protein 1-like 1 OS=Homo sapiens OX=9606 GN=NAP1L1 PE=1 SV=1	4.16	45659.3	415.358	3	8.7	169.283	182.687	216.087	124.54	148.483	72.0618	154.4	148.607	317.154	77.4047	161.071
NAP1L4	Q99733	NP1L4_HUMAN	Nucleosome assembly protein 1-like 4 OS=Homo sapiens OX=9606 GN=NAP1L4 PE=1 SV=1	4.4	42994.6	393.64	4	14.67	101.477	114.168	58.2345	55.3448	47.1809	48.034	70.828	82.4313		90.2798	74.2197
OLA1	Q9NTK5	OLA1_HUMAN	Obg-like ATPase 1 OS=Homo sapiens OX=9606 GN=OLA1 PE=1 SV=2	7.85	44971.7	952.42	4	16.41	186.333	201.45	121.855	107.226	108.999	105.131	248.878	236.74	128.284	146.194	159.109
OMG	P23515	OMGP_HUMAN	Oligodendrocyte-myelin glycoprotein OS=Homo sapiens OX=9606 GN=OMG PE=1 SV=2	7.87	50064.3	1621.23	8	21.59	340.528	307.637	945.63	895.651	794.718	799.869	439.932	429.747	829.213	944.924	672.785
OPALIN	Q96PE5	OPALI_HUMAN	Opalin OS=Homo sapiens OX=9606 GN=OPALIN PE=2 SV=1	5.79	15796.9	10187.4	6	61.7	101.718	104.303	816.604	868.683	560.843	565.607	452.281	417.577	564.443	656.775	510.883
OPCML	Q14982	OPCM_HUMAN	Opioid-binding protein/cell adhesion molecule OS=Homo sapiens OX=9606 GN=OPCML PE=1 SV=1	6.51	38520.9	887.922	7	26.09	111.871	110.189	187.974	175.798	203.239	177.987	177.039	108.131	170.907	195.871	161.9
CD200	P41217	OX2G_HUMAN	OX-2 membrane glycoprotein OS=Homo sapiens OX=9606 GN=CD200 PE=1 SV=4	8.58	31663.6	749.948	3	15.11	88.0454	76.169	196.239	256.03	248.997	242.216	149.965	159.888	245.34	271.547	193.444
P2RX7	Q99572	P2RX7_HUMAN	P2X purinoceptor 7 OS=Homo sapiens OX=9606 GN=P2RX7 PE=1 SV=4	8.09	70409.9	415.53	6	14.79	153.575	166.802	170.713	195.404	237.599	250.79	226.385	248.045	177.085	189.451	201.585
ZDHHC20	Q5W0Z9	ZDH20_HUMAN	Palmitoyltransferase ZDHHC20 OS=Homo sapiens OX=9606 GN=ZDHHC20 PE=1 SV=1	7.59	43076	350.033	5	16.16	132.337	112.68	83.6213	132.579	171.891	166.689	131.839	90.6533	208.93	166.615	139.783
PALM	O75781	PALM_HUMAN	Paralemmin-1 OS=Homo sapiens OX=9606 GN=PALM PE=1 SV=2	4.74	42247.1	551.049	5	19.9	129.585	112.402	73.1598	82.4869	59.6831	62.6534	106.057	81.7619	96.8971	65.8189	87.0505
PPIA	P62937	PPIA_HUMAN	Peptidyl-prolyl cis-trans isomerase A OS=Homo sapiens OX=9606 GN=PPIA PE=1 SV=2	7.85	18240.6	20169.6	10	81.21	2189.5	1821.84	1771.05	1694.99	1864.04	1753.84	1768.6	1587.36	2268.9	2099.15	1881.93
PPIB	P23284	PPIB_HUMAN	Peptidyl-prolyl cis-trans isomerase B OS=Homo sapiens OX=9606 GN=PPIB PE=1 SV=2	10.06	23799.6	1995.56	8	38.89	120.579	119.664	154.255	153.323	89.3697	82.7211	149.414	145.982	122.912	131.971	127.019
FKBP3	Q00688	FKBP3_HUMAN	Peptidyl-prolyl cis-trans isomerase FKBP3 OS=Homo sapiens OX=9606 GN=FKBP3 PE=1 SV=1	9.95	25233.9	463.244	3	16.52	69.0845	61.6825	54.7251	45.4516	53.5757	44.5852	70.313	92.6164	85.9385	77.8383	65.5811
PIN1	Q13526	PIN1_HUMAN	Peptidyl-prolyl cis-trans isomerase NIMA-interacting 1 OS=Homo sapiens OX=9606 GN=PIN1 PE=1 SV=1	9.26	18357.4	3199.56	4	51.53	337.639	354.421	155.234	144.259	89.2965	88.4363	194.945	204.408	88.3758	99.3482	175.636
PRPH	P41219	PERI_HUMAN	Peripherin OS=Homo sapiens OX=9606 GN=PRPH PE=1 SV=2	5.21	53765	1655.3	5	10.21	155.722	190.587	779.088	671.159	534.451	441.399	94.4852	50.6988	72.5763		332.241
PRDX1	Q06830	PRDX1_HUMAN	Peroxiredoxin-1 OS=Homo sapiens OX=9606 GN=PRDX1 PE=1 SV=1	8.24	22338.5	23094.4	14	75.38	2408.47	2249.27	3621.5	3475	3735.44	3471.27	2554.4	2308.23	2727.64	2683.81	2923.5
PRDX2	P32119	PRDX2_HUMAN	Peroxiredoxin-2 OS=Homo sapiens OX=9606 GN=PRDX2 PE=1 SV=5	5.58	22063	14732.3	14	74.24	1015.44	1076.31	1525.64	1507.07	1686.27	1669.38	1390.37	1445.48	1177.46	1319.76	1381.32
PRDX4	Q13162	PRDX4_HUMAN	Peroxiredoxin-4 OS=Homo sapiens OX=9606 GN=PRDX4 PE=1 SV=1	5.87	30768	3216.12	3	11.07	17.4284	14.9656	30.4484	28.304	22.1232	21.6503	18.0684	18.7805	24.3159	18.7382	21.4823
PRDX5	P30044	PRDX5_HUMAN	Peroxiredoxin-5_ mitochondrial OS=Homo sapiens OX=9606 GN=PRDX5 PE=1 SV=4	8.98	22314.6	1524.51	8	50.47	135.532	121.417	102.164	109.558	53.2003	45.7206	113.344	106.168	55.1005	63.0962	90.5301
PRDX6	P30041	PRDX6_HUMAN	Peroxiredoxin-6 OS=Homo sapiens OX=9606 GN=PRDX6 PE=1 SV=3	5.98	25149.1	1371.04	8	50.45	101.183	80.3071	138.706	106.607	125.867	124.1	117.644	100.431	85.0843	105.042	108.497
PRXL2A	Q9BRX8	PXL2A_HUMAN	Peroxiredoxin-like 2A OS=Homo sapiens OX=9606 GN=PRXL2A PE=1 SV=3	9.35	25878.3	804.489	4	20.96	90.5707	93.0744	93.4649	95.2762	60.9036	61.6573	105.202	96.8213	55.8489	77.3352	83.0154
HSD17B4	P51659	DHB4_HUMAN	Peroxisomal multifunctional enzyme type 2 OS=Homo sapiens OX=9606 GN=HSD17B4 PE=1 SV=3	9.18	80142.7	480.138	11	24.32	213.706	241.292	168.169	172.92	128.183	108.657	203.93	237.659	132.411	129.864	173.679
PHF24	Q9UPV7	PHF24_HUMAN	PHD finger protein 24 OS=Homo sapiens OX=9606 GN=PHF24 PE=1 SV=2	5.36	45933.1	260.82	2	9	95.3562	87.0056	87.97	81.2823	55.61		89.1652	118.825			87.8877
SLC25A3	Q00325	MPCP_HUMAN	Phosphate carrier protein_ mitochondrial OS=Homo sapiens OX=9606 GN=SLC25A3 PE=1 SV=2	9.77	40551.2	2479.53	13	33.98	1328.96	1095.67	1334.57	1341.86	993.857	917.774	1392.22	1198.54	794.895	851.561	1124.99
PEBP1	P30086	PEBP1_HUMAN	Phosphatidylethanolamine-binding protein 1 OS=Homo sapiens OX=9606 GN=PEBP1 PE=1 SV=3	7.41	21170.9	28401.9	12	80.75	2184.85	2067.08	2527.19	2159.97	2676.29	2377.31	2596.04	2424.59	3049.55	3183.14	2524.6
PIP5K1C	O60331	PI51C_HUMAN	Phosphatidylinositol 4-phosphate 5-kinase type-1 gamma OS=Homo sapiens OX=9606 GN=PIP5K1C PE=1 SV=2	5	73545.3	255.2	5	11.08	172.968	111.176	198.17	194.263	153.934	171.908	203.643	95.2663	149.964		161.255
PIP4K2A	P48426	PI42A_HUMAN	Phosphatidylinositol 5-phosphate 4-kinase type-2 alpha OS=Homo sapiens OX=9606 GN=PIP4K2A PE=1 SV=2	6.57	46452.8	2782.91	15	33.5	789.97	502.973	608.906	930.46	698.731	509.145	761.582	529.028	912.308	1041.62	728.473
PIP4K2B	P78356	PI42B_HUMAN	Phosphatidylinositol 5-phosphate 4-kinase type-2 beta OS=Homo sapiens OX=9606 GN=PIP4K2B PE=1 SV=1	7.01	47777.2	1012.83	10	22.6	287.586	238.471	214.073	216.081	253.83	199.684	280.054	242.759	275.557	290.119	249.821
PICALM	Q13492	PICAL_HUMAN	Phosphatidylinositol-binding clathrin assembly protein OS=Homo sapiens OX=9606 GN=PICALM PE=1 SV=2	7.98	70925.8	305.607	2	3.53	146.213	149.003	158.582	100.291	143.902	127.181	151.755	135.693	200.797	181.315	149.473
PGK1	P00558	PGK1_HUMAN	Phosphoglycerate kinase 1 OS=Homo sapiens OX=9606 GN=PGK1 PE=1 SV=3	8.16	45014	1561.65	14	55.16	427.581	432.228	323.358	297.984	365.811	368.544	432.093	397.958	599.87	460.328	410.576
PGAM1	P18669	PGAM1_HUMAN	Phosphoglycerate mutase 1 OS=Homo sapiens OX=9606 GN=PGAM1 PE=1 SV=2	6.82	28918	1751.68	8	44.88	307.297	275.83	177.071	171.221	134.132	140.664	238.574	243.525	221.117	148.441	205.787
PGAM2	P15259	PGAM2_HUMAN	Phosphoglycerate mutase 2 OS=Homo sapiens OX=9606 GN=PGAM2 PE=1 SV=3	9.34	28937.3	974.522	3	18.18	103.858	94.8271	69.7122	64.3857	50.0842	49.4518	117.267	108.882	77.303	76.5386	81.2311
PLAAT3	P53816	PLAT3_HUMAN	Phospholipase A and acyltransferase 3 OS=Homo sapiens OX=9606 GN=PLAAT3 PE=1 SV=2	8.17	18050.8	1559.91	4	46.3	75.204	91.8958	109.17	96.5152	94.7464	68.5726	99.3316	69.9193	193.834	208.505	110.769
GPX4	P36969	GPX4_HUMAN	Phospholipid hydroperoxide glutathione peroxidase OS=Homo sapiens OX=9606 GN=GPX4 PE=1 SV=3	8.37	22537.9	1926.96	7	48.73	284.535	241.645	256.187	237.307	295.545	312.564	326.995	291.39	253.659	252.469	275.23
LHPP	Q9H008	LHPP_HUMAN	Phospholysine phosphohistidine inorganic pyrophosphate phosphatase OS=Homo sapiens OX=9606 GN=LHPP PE=1 SV=2	5.76	29450.5	2438.21	8	43.7	224.85	385.665	256.503	298.65	359.933	342.28	211.978	349.185	202.552	241.75	287.335
PMVK	Q15126	PMVK_HUMAN	Phosphomevalonate kinase OS=Homo sapiens OX=9606 GN=PMVK PE=1 SV=3	5.42	22166	499.691	4	21.88	35.0651	34.9373		32.3884	24.0609	29.1529	41.2184	39.8005			33.8034
PSAT1	Q9Y617	SERC_HUMAN	Phosphoserine aminotransferase OS=Homo sapiens OX=9606 GN=PSAT1 PE=1 SV=2	7.6	40821.9	573.851	7	23.24	281.645	274.337	329.511	396.152	396.437	535.833	301.448	313.365	354.163	432.937	361.583
PHYHIP	Q92561	PHYIP_HUMAN	Phytanoyl-CoA hydroxylase-interacting protein OS=Homo sapiens OX=9606 GN=PHYHIP PE=1 SV=1	6.59	38142.9	469.446	2	4.55	898.872	850.973	1274.22	1295.4	1227.5	1220.42	1151.68	1015	1303.37	1337.5	1157.49
PHYHIPL	Q96FC7	PHIPL_HUMAN	Phytanoyl-CoA hydroxylase-interacting protein-like OS=Homo sapiens OX=9606 GN=PHYHIPL PE=1 SV=3	5.99	43056.4	522.955	4	12.77	97.2683	103.61	41.0792	52.1372	35.4582	34.4705	118.03	123.511	56.6016	51.3097	71.3476
ATP2B1	P20020	AT2B1_HUMAN	Plasma membrane calcium-transporting ATPase 1 OS=Homo sapiens OX=9606 GN=ATP2B1 PE=1 SV=4	5.56	135654	853.599	15	17.79	249.577	222.995	382.425	354.982	463.239	410.504	418.744	370.459	444.665	410.493	372.808
ATP2B2	Q01814	AT2B2_HUMAN	Plasma membrane calcium-transporting ATPase 2 OS=Homo sapiens OX=9606 GN=ATP2B2 PE=1 SV=2	5.56	138074	942.096	22	22.45	771.892	817.939	546.914	506.112	790.296	746.849	615.466	589.12	691.618	862.316	693.852
ATP2B3	Q16720	AT2B3_HUMAN	Plasma membrane calcium-transporting ATPase 3 OS=Homo sapiens OX=9606 GN=ATP2B3 PE=1 SV=3	5.3	135338	750.275	12	14.84	224.688	218.056	286.459	260.72	371.772	342.298	310.791	269.028	316.044	301.704	290.156
ATP2B4	P23634	AT2B4_HUMAN	Plasma membrane calcium-transporting ATPase 4 OS=Homo sapiens OX=9606 GN=ATP2B4 PE=1 SV=2	6.19	139118	836.266	18	18.78	380.852	290.343	527.618	488.298	593.365	529.016	520.61	473.082	542.604	474.25	482.004
PLLP	Q9Y342	PLLP_HUMAN	Plasmolipin OS=Homo sapiens OX=9606 GN=PLLP PE=1 SV=1	9.55	20100.7	6188.45	2	21.43	1215.49	1035.98	1752.67	1561.8	1908.05	1893.22	2240.93	1449.18	2013.98	1722.75	1679.4
PLS3	P13797	PLST_HUMAN	Plastin-3 OS=Homo sapiens OX=9606 GN=PLS3 PE=1 SV=4	5.27	71324.4	423.587	7	12.7	184.037	205.035	263.492	218.927	182.063	137.824	156.76	158.627	364.134	337.468	220.837
PAFAH1B1	P43034	LIS1_HUMAN	Platelet-activating factor acetylhydrolase IB subunit alpha OS=Homo sapiens OX=9606 GN=PAFAH1B1 PE=1 SV=2	7.04	47208.3	2810.03	18	64.15	1118.34	1042.73	869.863	897.3	638.853	628.723	978.768	960.355	664.724	704.396	850.406
PAFAH1B2	P68402	PA1B2_HUMAN	Platelet-activating factor acetylhydrolase IB subunit beta OS=Homo sapiens OX=9606 GN=PAFAH1B2 PE=1 SV=1	5.52	25740.4	428.736	2	12.23	67.9619	62.1835	65.6774	56.6782	54.8007	53.5736	62.5061	53.5038	125.773	114.152	71.681
PLEKHB1	Q9UF11	PKHB1_HUMAN	Pleckstrin homology domain-containing family B member 1 OS=Homo sapiens OX=9606 GN=PLEKHB1 PE=1 SV=1	7.15	27585.2	5946.56	11	47.33	869.215	869.432	1154.28	1214.52	1043.91	1081.75	855.072	929.18	1731.03	1877.43	1162.58
PHLDA3	Q9Y5J5	PHLA3_HUMAN	Pleckstrin homology-like domain family A member 3 OS=Homo sapiens OX=9606 GN=PHLDA3 PE=1 SV=1	10.34	14062.2	4691.89	5	33.07	55.9396	55.5738	87.2359	81.9733	61.6254	57.3207	36.4004	48.9398	221	223.445	92.9454
PLEC	Q15149	PLEC_HUMAN	Plectin OS=Homo sapiens OX=9606 GN=PLEC PE=1 SV=3	5.64	533787	1634.74	164	49.38	19824.6	10328.7	35132	48870.3	37609.9	32724.4	13359.3	13948.3	44389.9	47241.1	30342.8
PARP1	P09874	PARP1_HUMAN	Poly [ADP-ribose] polymerase 1 OS=Homo sapiens OX=9606 GN=PARP1 PE=1 SV=4	9.31	113882	554.119	5	7.4	9573.15	8863.27	9409.51	9525.75	9911.06	11082.7	14016	8966.9	232.215	13252.2	9483.28
PCBP1	Q15365	PCBP1_HUMAN	Poly(rC)-binding protein 1 OS=Homo sapiens OX=9606 GN=PCBP1 PE=1 SV=2	6.75	38011.1	1255.37	5	29.49	188.378	208.743	150.077	148.828	105.992	98.2809	175.831	199.422	103.429	111.323	149.03
PCBP2	Q15366	PCBP2_HUMAN	Poly(rC)-binding protein 2 OS=Homo sapiens OX=9606 GN=PCBP2 PE=1 SV=1	6.38	38979.4	447.714	4	15.62	85.5054	172.157	101.294	81.2649	68.551	66.5592	96.8141	124.755	57.7027	63.1368	91.774
KCNA1	Q09470	KCNA1_HUMAN	Potassium voltage-gated channel subfamily A member 1 OS=Homo sapiens OX=9606 GN=KCNA1 PE=1 SV=2	4.9	56921.9	777.869	10	25.66	197.48	203.75	119.133	165.332	204.18	195.268	152.525	175.27	168.128	189.817	177.088
KCNA2	P16389	KCNA2_HUMAN	Potassium voltage-gated channel subfamily A member 2 OS=Homo sapiens OX=9606 GN=KCNA2 PE=1 SV=2	4.59	57173.1	1837.59	13	30.66	379.998	494.702	386.497	439.596	606.842	635.988	416.081	450.663	517.676	511.704	483.975
KCNA3	P22001	KCNA3_HUMAN	Potassium voltage-gated channel subfamily A member 3 OS=Homo sapiens OX=9606 GN=KCNA3 PE=1 SV=3	5.53	64526.2	940.369	7	16	196.092	202.453	146.234	190.387	223.098	239.822	158.518	173.134	196.409	216.137	194.228
ATP4A	P20648	ATP4A_HUMAN	Potassium-transporting ATPase alpha chain 1 OS=Homo sapiens OX=9606 GN=ATP4A PE=2 SV=5	5.46	115830	1422.52	5	9.76	487.306	390.927	440.846	649.61	703.431	624.391	420.344	390.383	679.049	790.839	557.713
ATP12A	P54707	AT12A_HUMAN	Potassium-transporting ATPase alpha chain 2 OS=Homo sapiens OX=9606 GN=ATP12A PE=1 SV=3	6.13	116366	934.218	7	8.66	2125.55	3240.68	4477.37	1462.47	1446.09	2636.95	1502.42	3788.84	1477.55	2732.21	2489.01
POTEI	P0CG38	POTEI_HUMAN	POTE ankyrin domain family member I OS=Homo sapiens OX=9606 GN=POTEI PE=3 SV=1	5.81	122936	2468.43	13	18.14	473.083	768.842	985.575	604.227	672.16	536.335	610.695	529.684	490.114	356.322	602.704
ARL6IP5	O75915	PRAF3_HUMAN	PRA1 family protein 3 OS=Homo sapiens OX=9606 GN=ARL6IP5 PE=1 SV=1	10.27	21614.8	1085.39	5	29.26	283.186	257.521	290.639	274.381	278.251	281.276	297.175	242.545	248.962	305.341	275.928
LMNA	P02545	LMNA_HUMAN	Prelamin-A/C OS=Homo sapiens OX=9606 GN=LMNA PE=1 SV=1	6.61	74424.7	1972.19	19	41.42	675.82	682.561	363.704	343.004	222.881	201.054	235.094	207.57	157.025	187.753	327.647
PFN1	P07737	PROF1_HUMAN	Profilin-1 OS=Homo sapiens OX=9606 GN=PFN1 PE=1 SV=2	8.45	15225.3	5324.45	6	53.57	118.538	131.694	123.431	129.953	63.6627	71.6048	120.857	105.072	197.894	185.942	124.865
PFN2	P35080	PROF2_HUMAN	Profilin-2 OS=Homo sapiens OX=9606 GN=PFN2 PE=1 SV=3	6.79	15388.4	2170.28	3	25.71	88.8	70.0739	57.5472	64.042	42.6702	42.5159	77.8174	70.3416	56.1195	52.2671	62.2195
PDCD6IP	Q8WUM4	PDC6I_HUMAN	Programmed cell death 6-interacting protein OS=Homo sapiens OX=9606 GN=PDCD6IP PE=1 SV=1	6.11	96650.6	305.451	7	9.1	388.882	364.829	191.206	156.951	184.35	208.439	347.729	327.371	278.034	223.26	267.105
PHB	P35232	PHB_HUMAN	Prohibitin OS=Homo sapiens OX=9606 GN=PHB PE=1 SV=1	5.44	29861.1	3742.64	12	64.34	248.045	258.868	348.789	289.309	237.315	201.286	340.49	294.095	181.797	164.893	256.489
PHB2	Q99623	PHB2_HUMAN	Prohibitin-2 OS=Homo sapiens OX=9606 GN=PHB2 PE=1 SV=2	10.39	33296.4	3768.35	9	39.46	298.723	300.418	356.087	357.936	261.705	244.566	439.553	417.477	194.238	195.171	306.588
PSAP	P07602	SAP_HUMAN	Prosaposin OS=Homo sapiens OX=9606 GN=PSAP PE=1 SV=2	4.89	59937.6	769.816	8	13.36	327.819	305.124	588.485	807.363	431.7	507.384	248.654	288.113	438.233	463.84	440.671
PTGES3	Q15185	TEBP_HUMAN	Prostaglandin E synthase 3 OS=Homo sapiens OX=9606 GN=PTGES3 PE=1 SV=1	4.12	18982.6	2531.7	3	31.25	285.409	273.253	262.277	257.841	119.952	101.173	272.177	261.126	65.9234	72.1239	197.126
PTGDS	P41222	PTGDS_HUMAN	Prostaglandin-H2 D-isomerase OS=Homo sapiens OX=9606 GN=PTGDS PE=1 SV=1	7.83	21257	4025.03	6	53.16	133.849	103.836	305.832	290.124	174.482	169.74	158.954	145.831	256.628	211.465	195.074
PDIA3	P30101	PDIA3_HUMAN	Protein disulfide-isomerase A3 OS=Homo sapiens OX=9606 GN=PDIA3 PE=1 SV=4	5.96	57181.6	1334.21	16	42.77	621.574	315.127	635.273	523.096	299.098	313.379	619.308	391.933	259.397	245.994	422.418
P4HB	P07237	PDIA1_HUMAN	Protein disulfide-isomerase OS=Homo sapiens OX=9606 GN=P4HB PE=1 SV=3	4.57	57515.6	489.398	2	4.72	94.7392	79.5792	131.1	124.039	64.9615	69.719	119.49	124.719	83.0864	88.9421	98.0376
FAM177A1	Q8N128	F177A_HUMAN	Protein FAM177A1 OS=Homo sapiens OX=9606 GN=FAM177A1 PE=1 SV=1	4.19	23814.5	857.531	4	29.11	49.0273	44.6802	71.7039	68.7385	69.2736	56.9044	56.1009	59.1899	93.0278	84.0307	65.2677
FAM49A	Q9H0Q0	FA49A_HUMAN	Protein FAM49A OS=Homo sapiens OX=9606 GN=FAM49A PE=2 SV=1	5.65	37712.1	458.045	6	23.53	55.9091	60.7777	41.5832	39.4507	46.4499	42.3523	51.5905	39.6758	68.1186	58.4638	50.4372
FAM49B	Q9NUQ9	FA49B_HUMAN	Protein FAM49B OS=Homo sapiens OX=9606 GN=FAM49B PE=1 SV=1	5.7	37033.2	832.271	12	57.72	121.572	117.87	141.589	125.773	160.326	139.191	159.009	141.864	212.161	215.438	153.479
PRKCA	P17252	KPCA_HUMAN	Protein kinase C alpha type OS=Homo sapiens OX=9606 GN=PRKCA PE=1 SV=4	6.65	77890.6	1701.87	20	41.37	566.616	453.6	686.718	702.361	681.382	562.868	717.63	1559.91	578.44	569.867	707.939
PACSIN1	Q9BY11	PACN1_HUMAN	Protein kinase C and casein kinase substrate in neurons protein 1 OS=Homo sapiens OX=9606 GN=PACSIN1 PE=1 SV=1	4.97	51307.9	1343.89	15	53.15	547.237	495.867	319.184	363.507	427.366	493.442	528.631	472.178	547.041	455.658	465.011
PRKCB	P05771	KPCB_HUMAN	Protein kinase C beta type OS=Homo sapiens OX=9606 GN=PRKCB PE=1 SV=4	6.6	78009.7	2257.54	25	52.61	703.849	571.702	1009.82	947.901	974.769	801.245	1005.27	909.159	1004.12	838.497	876.633
PRKCE	Q02156	KPCE_HUMAN	Protein kinase C epsilon type OS=Homo sapiens OX=9606 GN=PRKCE PE=1 SV=1	6.75	85042.6	369.374	3	5.16	101.506	102.636	124.518	111.198	96.0184	91.0941	115.317	105.088		90.0743	104.161
PRKCG	P05129	KPCG_HUMAN	Protein kinase C gamma type OS=Homo sapiens OX=9606 GN=PRKCG PE=1 SV=3	7.19	79702.6	1580.98	23	49.93	184.278	189.879	715.804	624.548	630.177	547.435	651.179	594.852	475.172	517.852	513.117
NDRG1	Q92597	NDRG1_HUMAN	Protein NDRG1 OS=Homo sapiens OX=9606 GN=NDRG1 PE=1 SV=1	5.43	43291.8	4374.09	13	57.36	771.94	795.17	1117.42	1094.7	884.135	945.345	733.602	749.545	864.766	903.731	886.035
NDRG2	Q9UN36	NDRG2_HUMAN	Protein NDRG2 OS=Homo sapiens OX=9606 GN=NDRG2 PE=1 SV=2	4.92	41140.4	392.495	4	16.44	122.773	120.97	261.732	272.01	141.328	145.337	133.214	138.106	134.859	158.729	162.906
NDRG4	Q9ULP0	NDRG4_HUMAN	Protein NDRG4 OS=Homo sapiens OX=9606 GN=NDRG4 PE=1 SV=2	5.79	38858	572.069	6	28.69	127.5	136.091	143.879	137.96	122.106	113.93	141.226	157.514	89.8141	101.264	127.128
NIPSNAP1	Q9BPW8	NIPS1_HUMAN	Protein NipSnap homolog 1 OS=Homo sapiens OX=9606 GN=NIPSNAP1 PE=1 SV=1	9.66	33481.1	2175.85	9	47.18	200.789	218.703	228.39	204.204	172.308	180.651	223.657	223.605	201.067	188.606	204.198
NIPSNAP2	O75323	NIPS2_HUMAN	Protein NipSnap homolog 2 OS=Homo sapiens OX=9606 GN=NIPSNAP2 PE=1 SV=1	9.73	33970.8	334.639	3	16.78	545.337	574.433	260.609	254.873	178.147	198.61	377.876	470.001	166.521	202.021	322.843
PPP1R14A	Q96A00	PP14A_HUMAN	Protein phosphatase 1 regulatory subunit 14A OS=Homo sapiens OX=9606 GN=PPP1R14A PE=1 SV=1	9.98	16750	2590.79	6	55.1	191.792	156.103	237.118	180.381	147.831	104.048	168.252	131.588	286.021	232.798	183.593
RUFY3	Q7L099	RUFY3_HUMAN	Protein RUFY3 OS=Homo sapiens OX=9606 GN=RUFY3 PE=1 SV=1	5.2	53250.2	3442.48	22	55.01	841.864	846.297	584.22	591.822	425.431	408.004	824.035	782.241	351.77	322.338	597.802
S100A1	P23297	S10A1_HUMAN	Protein S100-A1 OS=Homo sapiens OX=9606 GN=S100A1 PE=1 SV=2	4.19	10602.9	4149.89	2	23.4	143.571	107.55	81.7092	165.774	62.7044	48.8405	60.5299	61.487	199.268	211.895	114.333
S100B	P04271	S100B_HUMAN	Protein S100-B OS=Homo sapiens OX=9606 GN=S100B PE=1 SV=2	4.33	10827.1	9887.72	3	40.22	647.914	504.905	569.512	823.297	719.097	523.372	706.029	737.036	737.351	733.703	670.221
SHISA4	Q96DD7	SHSA4_HUMAN	Protein shisa-4 OS=Homo sapiens OX=9606 GN=SHISA4 PE=2 SV=3	7.8	22263.5	3180.18	2	19.8	87.484	90.0258	225.483	227.218	224.812	215.342	164.935	123.63	396.96	424.026	217.992
PTP4A2	Q12974	TP4A2_HUMAN	Protein tyrosine phosphatase type IVA 2 OS=Homo sapiens OX=9606 GN=PTP4A2 PE=1 SV=1	8.38	19526.4	1002.08	5	38.32	44.9597	41.6918	98.8596	96.8811	107.917	112.825	90.6691	69.898	86.7528	100.402	85.0856
PARK7	Q99497	PARK7_HUMAN	Protein/nucleic acid deglycase DJ-1 OS=Homo sapiens OX=9606 GN=PARK7 PE=1 SV=2	6.4	20062.2	2183.12	7	50.26	284.837	213.07	159.651	164.159	136.677	127.08	220.196	181.414	189.491	156.09	183.267
PADI2	Q9Y2J8	PADI2_HUMAN	Protein-arginine deiminase type-2 OS=Homo sapiens OX=9606 GN=PADI2 PE=1 SV=2	5.27	76305.4	6531.77	32	61.5	4844.83	4618.6	3369.83	3593.29	4149.9	3225.99	3433.03	3809.72	4512.15	5239.86	4079.72
PCMT1	P22061	PIMT_HUMAN	Protein-L-isoaspartate(D-aspartate) O-methyltransferase OS=Homo sapiens OX=9606 GN=PCMT1 PE=1 SV=4	6.85	24807.5	2530.44	9	64.76	145.067	151.592	109.157	105.618	116.197	114.353	119.775	141.475	185.779	159.696	134.871
HSP90AA4P	Q58FG1	HS904_HUMAN	Putative heat shock protein HSP 90-alpha A4 OS=Homo sapiens OX=9606 GN=HSP90AA4P PE=5 SV=1	4.89	47826	897.252	3	18.18	82.3027	49.5137	78.4244	51.3122	61.529	80.2969	86.1282	87.8979	137.784	88.8971	80.4086
DNAJC6	O75061	AUXI_HUMAN	Putative tyrosine-protein phosphatase auxilin OS=Homo sapiens OX=9606 GN=DNAJC6 PE=1 SV=3	6.88	100738	468.112	13	19.06	411.849	399.463	441.677	407.831	440.963	401.668	498.569	482.822	419.129	502.982	440.695
PDXK	O00764	PDXK_HUMAN	Pyridoxal kinase OS=Homo sapiens OX=9606 GN=PDXK PE=1 SV=1	5.72	35330.5	2469.04	5	43.27	168.824	177.159	97.4156	103.515		32.7888	177.78	158.181			130.809
PLPBP	O94903	PLPHP_HUMAN	Pyridoxal phosphate homeostasis protein OS=Homo sapiens OX=9606 GN=PLPBP PE=1 SV=1	7.29	30629.1	723.103	2	9.45	56.1514	54.2829	46.0446	39.1163			48.3759	66.2438			51.7025
PC	P11498	PYC_HUMAN	Pyruvate carboxylase_ mitochondrial OS=Homo sapiens OX=9606 GN=PC PE=1 SV=2	6.41	130375	271.066	4	4.84	238.767	213.565	241.636	262.499		123.438	313.215	315.073		138.424	230.827
PDHA1	P08559	ODPA_HUMAN	Pyruvate dehydrogenase E1 component subunit alpha_ somatic form_ mitochondrial OS=Homo sapiens OX=9606 GN=PDHA1 PE=1 SV=3	8	43980.1	615.604	7	29.74	218.552	212.566	270.564	249.573	123.159	127.506	229.859	234.795	122.977	144.049	193.36
PDHB	P11177	ODPB_HUMAN	Pyruvate dehydrogenase E1 component subunit beta_ mitochondrial OS=Homo sapiens OX=9606 GN=PDHB PE=1 SV=3	6.23	39575.7	3853.91	14	60.17	277.468	307.204	360.629	320.171	198.645	191.262	333.151	356.307	201.519	201.471	274.783
PKM	P14618	KPYM_HUMAN	Pyruvate kinase PKM OS=Homo sapiens OX=9606 GN=PKM PE=1 SV=4	7.76	58507.3	22520.7	31	73.63	8273.77	8342.75	6057.15	5812.33	6259.26	6316.89	7196.17	6586.44	7067.28	6435.18	6834.72
CRYZ	Q08257	QOR_HUMAN	Quinone oxidoreductase OS=Homo sapiens OX=9606 GN=CRYZ PE=1 SV=1	8.69	35377.8	1551.94	9	44.98	340.58	347.024	194.477	196.539	117.374	140.6	195.362	227.022	133.505	119.374	201.186
GDI1	P31150	GDIA_HUMAN	Rab GDP dissociation inhibitor alpha OS=Homo sapiens OX=9606 GN=GDI1 PE=1 SV=2	4.81	51210.1	6951.49	24	80.09	738.278	692.748	839.967	806.455	638.658	699.309	772.905	788.155	1009.14	1012.39	799.801
GDI2	P50395	GDIB_HUMAN	Rab GDP dissociation inhibitor beta OS=Homo sapiens OX=9606 GN=GDI2 PE=1 SV=2	6.08	51119.6	6103.94	29	75.73	802.706	848.49	626.882	561.063	636.705	662.943	893.084	933.677	966.826	860.859	779.323
RDX	P35241	RADI_HUMAN	Radixin OS=Homo sapiens OX=9606 GN=RDX PE=1 SV=1	5.99	68678.1	8041.57	28	55.92	785.326	800.785	1595.05	1625.94	1165.97	1150.48	906.644	992.074	1118.98	1219.61	1136.09
RAP1GDS1	P52306	GDS1_HUMAN	Rap1 GTPase-GDP dissociation stimulator 1 OS=Homo sapiens OX=9606 GN=RAP1GDS1 PE=1 SV=3	5.01	67115.4	231.858	3	7.25	202.154	185.247	107.402	92.4405	77.9045	79.7055	133.289	118.609	133.389	116.965	124.71
RAC1	P63000	RAC1_HUMAN	Ras-related C3 botulinum toxin substrate 1 OS=Homo sapiens OX=9606 GN=RAC1 PE=1 SV=1	8.58	21849.3	9401.04	6	39.06	1468.85	1412.95	1602.26	1613.52	1541.42	1548.19	1513.61	1460.24	1530.36	1706.53	1539.79
RAB10	P61026	RAB10_HUMAN	Ras-related protein Rab-10 OS=Homo sapiens OX=9606 GN=RAB10 PE=1 SV=1	8.58	22769.1	9304.83	10	50	552.548	530.971	612.295	582.87	669.615	642.249	622.236	608.109	796.245	832.926	645.006
RAB14	P61106	RAB14_HUMAN	Ras-related protein Rab-14 OS=Homo sapiens OX=9606 GN=RAB14 PE=1 SV=4	5.82	24125.1	4344.95	11	61.4	550.681	499.512	527.719	678.688	670.366	778.807	485.837	302.557	772.182	377.006	564.335
RAB15	P59190	RAB15_HUMAN	Ras-related protein Rab-15 OS=Homo sapiens OX=9606 GN=RAB15 PE=1 SV=1	5.4	24675.8	3051.28	3	27.83	4808.94	4760.29	3828.22	4803.06	4422.02	4178.47	3139.69	3945.23	3376.03	1149.64	3841.16
RAB18	Q9NP72	RAB18_HUMAN	Ras-related protein Rab-18 OS=Homo sapiens OX=9606 GN=RAB18 PE=1 SV=1	4.93	23262.2	1487.43	8	48.54	138.22	131.078	124.837	122.588	113.942	129.902	127.827	131.821	142.894	141.41	130.452
RAB1A	P62820	RAB1A_HUMAN	Ras-related protein Rab-1A OS=Homo sapiens OX=9606 GN=RAB1A PE=1 SV=3	5.86	22905.9	7046.66	10	59.51	127.619	127.6	182.105	184.929	151.33	141.069	171.783	193.988	192.545	203.849	167.682
RAB1B	Q9H0U4	RAB1B_HUMAN	Ras-related protein Rab-1B OS=Homo sapiens OX=9606 GN=RAB1B PE=1 SV=1	5.4	22342.3	7778.34	9	58.71	127.767	130.18	186.718	188.284	125.706	120.518	212.837	196.506	178.166	191.831	165.851
RAB21	Q9UL25	RAB21_HUMAN	Ras-related protein Rab-21 OS=Homo sapiens OX=9606 GN=RAB21 PE=1 SV=3	7.92	24746.8	1561.69	7	40.89	90.3413	63.546	158.667	124.599	139.331	128.759	129.579	129.618	173.587	165.325	130.335
RAB22A	Q9UL26	RB22A_HUMAN	Ras-related protein Rab-22A OS=Homo sapiens OX=9606 GN=RAB22A PE=1 SV=2	8.25	22083.2	734.851	3	27.32	26.2988	33.5359	30.4446	40.0439	40.0858	42.8937	28.1472	26.0522	66.2294	71.0668	40.4798
RAB2A	P61019	RAB2A_HUMAN	Ras-related protein Rab-2A OS=Homo sapiens OX=9606 GN=RAB2A PE=1 SV=1	6.11	23716.7	7636.09	12	71.23	224.987	250.363	296.453	292.146	278.731	263.373	247.618	233.074	281.315	268.082	263.614
RAB2B	Q8WUD1	RAB2B_HUMAN	Ras-related protein Rab-2B OS=Homo sapiens OX=9606 GN=RAB2B PE=1 SV=1	7.85	24442.5	3207.07	9	55.09	50.0574	76.5771	77.9878	66.2101	60.6353	48.934	44.3633	49.4156	66.7992	69.3734	61.0353
RAB30	Q15771	RAB30_HUMAN	Ras-related protein Rab-30 OS=Homo sapiens OX=9606 GN=RAB30 PE=1 SV=2	4.71	23400.4	1494.56	3	19.21	37.7972	70.4694	25.6064	45.6859	38.231	55.2788		48.3243	38.0319	30.6709	43.344
RAB35	Q15286	RAB35_HUMAN	Ras-related protein Rab-35 OS=Homo sapiens OX=9606 GN=RAB35 PE=1 SV=1	8.39	23310.4	3371.73	5	41.29	62.7749	68.4277	85.558	91.8093	100.898	94.224	76.7195	82.5723	74.9431	70.6385	80.8565
RAB39A	Q14964	RB39A_HUMAN	Ras-related protein Rab-39A OS=Homo sapiens OX=9606 GN=RAB39A PE=1 SV=2	7.59	25405.9	1008.22	3	12.44	2144.95	4906.71	1969.7	2683.31	2823.48	3077.02	5040.8	5263.64	6240.24	6472.28	4062.21
RAB39B	Q96DA2	RB39B_HUMAN	Ras-related protein Rab-39B OS=Homo sapiens OX=9606 GN=RAB39B PE=1 SV=1	7.85	24850.3	1601.47	2	13.62	1960.35	1775.8	2314.41	1253.69	1706.67	1768.01	365.89	455.429	93.667	75.0498	1176.9
RAB3A	P20336	RAB3A_HUMAN	Ras-related protein Rab-3A OS=Homo sapiens OX=9606 GN=RAB3A PE=1 SV=1	4.66	25212.1	1707.72	3	18.18	114.899	79.9268	163.376	59.0611	19.64	56.3999	82.1233	59.2413	44.8723	17.1065	69.6646
RAB3B	P20337	RAB3B_HUMAN	Ras-related protein Rab-3B OS=Homo sapiens OX=9606 GN=RAB3B PE=1 SV=2	4.65	24986.1	1494.56	3	19.18	2865.25	940.195	1108.13	683.889	897.374	1670.38	2492.76	847.895	657.725	540.773	1270.44
RAB43	Q86YS6	RAB43_HUMAN	Ras-related protein Rab-43 OS=Homo sapiens OX=9606 GN=RAB43 PE=1 SV=1	5.31	23567.5	1608.06	2	9.43	28.2381	29.7543	37.9253	36.1912	36.6927	34.5648	23.8816		73.2515	64.5824	40.5646
RAB4A	P20338	RAB4A_HUMAN	Ras-related protein Rab-4A OS=Homo sapiens OX=9606 GN=RAB4A PE=1 SV=3	5.74	24674.8	1645.79	2	11.01	511.475	366.414	338.682	578.118	247.466	445.86	639.043	582.676	339.679	526.808	457.622
RAB4B	P61018	RAB4B_HUMAN	Ras-related protein Rab-4B OS=Homo sapiens OX=9606 GN=RAB4B PE=1 SV=1	5.72	23871.9	1685.86	5	39.44	224.145	427.805	281.897	461.496	285.65	525.874	378.593	467.332	385.907	611.312	405.001
RAB5A	P20339	RAB5A_HUMAN	Ras-related protein Rab-5A OS=Homo sapiens OX=9606 GN=RAB5A PE=1 SV=2	8.25	23886.8	2104.19	7	47.44	82.7779	82.5504	92.5675	102.035	78.4005	74.4601	89.8221	86.7559	135.633	150.996	97.5999
RAB5B	P61020	RAB5B_HUMAN	Ras-related protein Rab-5B OS=Homo sapiens OX=9606 GN=RAB5B PE=1 SV=1	8.24	23935	5026.25	9	59.07	179.456	161.176	245.869	228.946	275.709	250.141	249.468	230.118	349.302	345.817	251.6
RAB5C	P51148	RAB5C_HUMAN	Ras-related protein Rab-5C OS=Homo sapiens OX=9606 GN=RAB5C PE=1 SV=2	8.58	23710.7	3751.17	9	58.8	146.46	127.856	184.371	181.37	224.211	219.858	148.149	133.454	197.419	214.365	177.751
RAB6A	P20340	RAB6A_HUMAN	Ras-related protein Rab-6A OS=Homo sapiens OX=9606 GN=RAB6A PE=1 SV=3	5.23	23706.9	1955.64	5	36.54	1079.14	698.379	807.349	1165.79	846.324	855.705	887.707	822.901	1014.62	1105.1	928.302
RAB6B	Q9NRW1	RAB6B_HUMAN	Ras-related protein Rab-6B OS=Homo sapiens OX=9606 GN=RAB6B PE=1 SV=1	5.22	23575.8	1483.12	3	30.77	12.0864	12.4453	2.84926	2.15153	2.69743	2.68581	15.6417	17.2914	4.06613	3.08452	7.49995
RAB7A	P51149	RAB7A_HUMAN	Ras-related protein Rab-7a OS=Homo sapiens OX=9606 GN=RAB7A PE=1 SV=1	6.57	23774.9	5330.91	11	62.32	243.742	301.387	301.262	418.791	693.067	618.37	301.905	255.2	338.554	342.786	381.506
RAB8A	P61006	RAB8A_HUMAN	Ras-related protein Rab-8A OS=Homo sapiens OX=9606 GN=RAB8A PE=1 SV=1	9.55	23839.3	3025.28	7	36.71	42.359	27.7013	60.0336	34.9549	44.6137	29.8648	26.7866	16.6152	52.3927	30.6513	36.5973
RAB8B	Q92930	RAB8B_HUMAN	Ras-related protein Rab-8B OS=Homo sapiens OX=9606 GN=RAB8B PE=1 SV=2	9.55	23755.2	3430.73	6	29.95	68.4861	60.3931	60.3937	59.6204	65.2688	72.9684	73.6545	41.7228	80.8081	94.8863	67.8202
RALA	P11233	RALA_HUMAN	Ras-related protein Ral-A OS=Homo sapiens OX=9606 GN=RALA PE=1 SV=1	7	23737.9	8599.81	7	54.85	752.822	701.483	982.276	958.831	912.835	888.615	879.322	860.665	969.126	867.454	877.343
RALB	P11234	RALB_HUMAN	Ras-related protein Ral-B OS=Homo sapiens OX=9606 GN=RALB PE=1 SV=1	6.26	23522.6	4129.89	5	46.6	265.976	229.278	199.112	179.553	152.154	142.658	253.498	204.43	143.698	159.031	192.939
RAP1A	P62834	RAP1A_HUMAN	Ras-related protein Rap-1A OS=Homo sapiens OX=9606 GN=RAP1A PE=1 SV=1	6.53	21329.4	15650.4	11	79.35	775.316	788.386	946.947	960.217	1000.65	1005.48	912.85	857.83	969.024	1154.29	937.1
RAP1B	P61224	RAP1B_HUMAN	Ras-related protein Rap-1b OS=Homo sapiens OX=9606 GN=RAP1B PE=1 SV=1	5.46	21052.9	9883.17	11	80.43	325.66	320.646	447.199	433.109	493.929	381.547	412.305	400.661	446.668	465.487	412.721
RAP2A	P10114	RAP2A_HUMAN	Ras-related protein Rap-2a OS=Homo sapiens OX=9606 GN=RAP2A PE=1 SV=1	4.53	20843.6	4185.75	10	62.84	127.382	114.461	147.705	138.983	178.211	176.875	134.184	132.586	158.317	178.32	148.703
RAP2B	P61225	RAP2B_HUMAN	Ras-related protein Rap-2b OS=Homo sapiens OX=9606 GN=RAP2B PE=1 SV=1	4.53	20732.5	1315.41	8	46.45	30.2586	27.002	35.0392	38.2271	39.0138	43.1771	30.3814	30.5322	43.4755	47.0663	36.4173
RAP2C	Q9Y3L5	RAP2C_HUMAN	Ras-related protein Rap-2c OS=Homo sapiens OX=9606 GN=RAP2C PE=1 SV=1	4.67	20972.9	1517.77	9	54.64	19.2159	18.919	19.533	16.9581	27.1811	26.4594	20.0199	22.2256	20.7615	21.4098	21.2683
REEP5	Q00765	REEP5_HUMAN	Receptor expression-enhancing protein 5 OS=Homo sapiens OX=9606 GN=REEP5 PE=1 SV=3	8.22	21721.3	1756.3	5	31.22	224.34	202.402	156.005	168.799	134.361	115.063	204.691	196.879	172.4	97.6318	167.257
RACK1	P63244	RACK1_HUMAN	Receptor of activated protein C kinase 1 OS=Homo sapiens OX=9606 GN=RACK1 PE=1 SV=3	7.57	35533	391.522	3	21.77	74.5994	61.9854	55.6749	54.1588	48.4524	56.7178	69.4874	59.8711	54.2891		59.4707
PTPRD	P23468	PTPRD_HUMAN	Receptor-type tyrosine-protein phosphatase delta OS=Homo sapiens OX=9606 GN=PTPRD PE=1 SV=2	6.15	215787	260.886	8	6.01	4613.82	3901	6219.53	5633.47	6038.77	5666.65	4380.93	4099.44	5717.44	6028.25	5229.93
RTN1	Q16799	RTN1_HUMAN	Reticulon-1 OS=Homo sapiens OX=9606 GN=RTN1 PE=1 SV=1	4.41	83902.8	864.815	14	28.74	1012.57	926.308	832.304	922.228	713.002	519.942	890.298	798.925	537.191	525.019	767.779
RTN4	Q9NQC3	RTN4_HUMAN	Reticulon-4 OS=Homo sapiens OX=9606 GN=RTN4 PE=1 SV=2	4.22	130331	2028.74	36	55.29	5470.08	5691.16	5477.11	5481.69	4597.29	4835.78	5020.24	5684.35	5484.7	6555.88	5429.83
RBP1	P09455	RET1_HUMAN	Retinol-binding protein 1 OS=Homo sapiens OX=9606 GN=RBP1 PE=1 SV=2	4.8	16021.3	758.189	3	38.52	35.0486	32.5277	36.4992	34.3703	47.0823	29.6874	21.8355	30.5526	93.2883	92.8373	45.3729
ARHGDIA	P52565	GDIR1_HUMAN	Rho GDP-dissociation inhibitor 1 OS=Homo sapiens OX=9606 GN=ARHGDIA PE=1 SV=3	4.82	23264.2	2329.86	4	25.49	123.601	89.6939	102.417	96.7153	94.9288	85.884	91.7975	77.5126	151.345	140.068	105.396
ARHGAP1	Q07960	RHG01_HUMAN	Rho GTPase-activating protein 1 OS=Homo sapiens OX=9606 GN=ARHGAP1 PE=1 SV=1	5.85	50492.8	482.082	3	8.66	518.146	463.835	970.771	772.785	616.123	570.384	1016.12	912.606	1030.3	1001.01	787.209
ARHGEF18	Q6ZSZ5	ARHGI_HUMAN	Rho guanine nucleotide exchange factor 18 OS=Homo sapiens OX=9606 GN=ARHGEF18 PE=1 SV=4	5.94	152669	708.095	2	3.45	608.123	1090.46	2083.73	1916.28	1603.67	2144	991.845	960.476	1256.34	1458.98	1411.39
ARHGEF2	Q92974	ARHG2_HUMAN	Rho guanine nucleotide exchange factor 2 OS=Homo sapiens OX=9606 GN=ARHGEF2 PE=1 SV=4	6.91	112455	333.856	4	4.16	224.266	229.971	264.377	258.685	260.205	214.611	223.576	181.319	243.49	194.955	229.545
RHOB	P62745	RHOB_HUMAN	Rho-related GTP-binding protein RhoB OS=Homo sapiens OX=9606 GN=RHOB PE=1 SV=1	4.92	22579.6	14081.6	11	76.02	1178.61	1095.53	1316.17	1334.74	1395.14	1338.64	1184.05	1180.92	1463.74	1408.52	1289.61
RHOG	P84095	RHOG_HUMAN	Rho-related GTP-binding protein RhoG OS=Homo sapiens OX=9606 GN=RHOG PE=1 SV=1	8.08	21764.7	20712.5	12	67.54	669.166	628.332	930.865	995.153	826.023	848.397	769.675	754.094	943.62	965.076	833.04
RNH1	P13489	RINI_HUMAN	Ribonuclease inhibitor OS=Homo sapiens OX=9606 GN=RNH1 PE=1 SV=2	4.52	51798.4	1456.46	17	64.86	303.781	270.556	348.262	311.229	223.031	213.541	254.476	222.645	315.741	309.369	277.263
PRPS1	P60891	PRPS1_HUMAN	Ribose-phosphate pyrophosphokinase 1 OS=Homo sapiens OX=9606 GN=PRPS1 PE=1 SV=2	6.57	35347.5	438.49	2	10.69	180.22	175.89	165.131	139.858	82.9419	91.2267	148.986	149.793	104.715	187.799	142.656
SBDS	Q9Y3A5	SBDS_HUMAN	Ribosome maturation protein SBDS OS=Homo sapiens OX=9606 GN=SBDS PE=1 SV=4	9.15	29048.7	2137.84	12	53.2	154.89	148.068	223.946	222.421	248.596	259.613	151.427	150.692	270.428	294.287	212.437
RTRAF	Q9Y224	RTRAF_HUMAN	RNA transcription_ translation and transport factor protein OS=Homo sapiens OX=9606 GN=RTRAF PE=1 SV=1	6.23	28182.2	365.567	3	20.49	54.7967	63.4129	44.6395	40.2619	40.9522	35.5146	35.8521	46.649		36.5525	44.2924
RBM6	P78332	RBM6_HUMAN	RNA-binding protein 6 OS=Homo sapiens OX=9606 GN=RBM6 PE=1 SV=5	5.9	129271	383.421	2	1.34	15263.4	28537.3	16860	15551.2	16517.5	14849.9	31518.1	29326	19730.4	19913	20806.7
RUFY2	Q8WXA3	RUFY2_HUMAN	RUN and FYVE domain-containing protein 2 OS=Homo sapiens OX=9606 GN=RUFY2 PE=1 SV=3	5.51	70751.7	588.454	3	4.95	598.876	554.496	828.16	809.93	1044.4	620.182	180.841	165.349	58.3493	71.6344	493.221
SCCPDH	Q8NBX0	SCPDL_HUMAN	Saccharopine dehydrogenase-like oxidoreductase OS=Homo sapiens OX=9606 GN=SCCPDH PE=1 SV=1	9.52	47493.6	1277.25	11	39.86	265.688	280.882	167.38	192.584	194.888	204.79	346.215	337.229	246.688	248.66	248.5
ATP2A2	P16615	AT2A2_HUMAN	Sarcoplasmic/endoplasmic reticulum calcium ATPase 2 OS=Homo sapiens OX=9606 GN=ATP2A2 PE=1 SV=1	5.06	116411	451.179	13	20.25	704.029	1942.17	1807.73	763.738	525.341	496.143	1911.18	2094.1	2111.85	584.191	1294.05
SEC14L2	O76054	S14L2_HUMAN	SEC14-like protein 2 OS=Homo sapiens OX=9606 GN=SEC14L2 PE=1 SV=1	7.78	46658.6	504.866	3	10.67	89.4257	92.2737	81.4138	73.3636	158.651	152.139	91.6367	75.4384	63.0514	97.3614	97.4755
SCRN1	Q12765	SCRN1_HUMAN	Secernin-1 OS=Homo sapiens OX=9606 GN=SCRN1 PE=1 SV=2	4.47	47009.4	824.144	10	27.78	243.292	239.516	225.184	229.371	207.973	256.005	249.926	254.151	389.294	353.442	264.815
SEPTIN10	Q9P0V9	SEP10_HUMAN	Septin-10 OS=Homo sapiens OX=9606 GN=SEPTIN10 PE=1 SV=2	6.38	53049.3	2469.63	17	60.79	541.733	549.621	503.361	509.989	480.765	450.618	353.022	364.482	360.248	374.39	448.823
SEPTIN11	Q9NVA2	SEP11_HUMAN	Septin-11 OS=Homo sapiens OX=9606 GN=SEPTIN11 PE=1 SV=3	6.4	49683.5	3853.19	12	42.66	847.037	725.647	1098.48	865.341	3123.14	2916.37	2368.05	2223.66	1362.62	900.604	1643.1
SEPTIN14	Q6ZU15	SEP14_HUMAN	Septin-14 OS=Homo sapiens OX=9606 GN=SEPTIN14 PE=1 SV=2	5.84	50481.2	1763.76	4	14.81	108.154	139.67	70.4699	66.0312	98.7455	107.238	98.3588	96.7707	104.356	98.103	98.7898
SEPTIN2	Q15019	SEPT2_HUMAN	Septin-2 OS=Homo sapiens OX=9606 GN=SEPTIN2 PE=1 SV=1	6.17	41715.7	16543.8	19	72.3	3939.78	3922.37	2608.54	2492.31	2882.84	3000.68	2580.97	2663.13	2879.34	2714.64	2968.46
SEPTIN4	O43236	SEPT4_HUMAN	Septin-4 OS=Homo sapiens OX=9606 GN=SEPTIN4 PE=1 SV=1	5.72	55554.5	7509.78	20	61.72	2908.54	2813.8	4613.63	4048.54	3593.28	3650.58	3256.6	3123	3572.36	2950.37	3453.07
SEPTIN5	Q99719	SEPT5_HUMAN	Septin-5 OS=Homo sapiens OX=9606 GN=SEPTIN5 PE=1 SV=1	6.24	43233.3	1579.35	7	30.62	135.082	85.5588	87.6077	92.5733	165.234	138.85	146.395	88.1964	144.131	114.269	119.79
SEPTIN7	Q16181	SEPT7_HUMAN	Septin-7 OS=Homo sapiens OX=9606 GN=SEPTIN7 PE=1 SV=2	8.97	50965.2	15961.3	20	57.67	5969	5628.59	5861.24	6073.96	5775.45	5902.9	5294.06	5129.06	5138.19	5550.05	5632.25
SEPTIN8	Q92599	SEPT8_HUMAN	Septin-8 OS=Homo sapiens OX=9606 GN=SEPTIN8 PE=1 SV=4	5.87	56269.6	16086.2	26	60.46	5644.85	5534.5	5884.26	5468.09	5477.78	5272.11	5173.03	4689.79	5369.11	5704.66	5421.82
SEPTIN9	Q9UHD8	SEPT9_HUMAN	Septin-9 OS=Homo sapiens OX=9606 GN=SEPTIN9 PE=1 SV=2	9.46	65686.7	2466.37	19	45.9	1791.35	1744.53	1270.95	1137.29	1305.64	1322.72	1502.35	1576.14	1380.68	1374.51	1440.61
DCLK1	O15075	DCLK1_HUMAN	Serine/threonine-protein kinase DCLK1 OS=Homo sapiens OX=9606 GN=DCLK1 PE=1 SV=2	8.85	82794.4	1372.87	26	50.95	719.067	711.809	612.001	618.38	548.941	2305.68	582.613	2107.37	417.522	422.079	904.546
OXSR1	O95747	OXSR1_HUMAN	Serine/threonine-protein kinase OSR1 OS=Homo sapiens OX=9606 GN=OXSR1 PE=1 SV=1	6.02	58307.4	298.311	3	6.83	90.0573	94.5747	81.211	95.4801	74.9677	81.4979	88.9374	85.3274	48.7078	62.6767	80.3438
PPP2R2A	P63151	2ABA_HUMAN	Serine/threonine-protein phosphatase 2A 55 kDa regulatory subunit B alpha isoform OS=Homo sapiens OX=9606 GN=PPP2R2A PE=1 SV=1	5.79	52205.4	566.592	6	18.79	224.09	222.377	196.137	178.144	148.385	166.498	202.356	220.112	228.434	193.247	197.978
PPP2R5D	Q14738	2A5D_HUMAN	Serine/threonine-protein phosphatase 2A 56 kDa regulatory subunit delta isoform OS=Homo sapiens OX=9606 GN=PPP2R5D PE=1 SV=1	8.21	70334.1	279.021	2	3.32	207.694	167.352	136.45	131.576	95.6839	85.3121	168.103	167.089			144.908
PPP2R1A	P30153	2AAA_HUMAN	Serine/threonine-protein phosphatase 2A 65 kDa regulatory subunit A alpha isoform OS=Homo sapiens OX=9606 GN=PPP2R1A PE=1 SV=4	4.82	66107.1	1425.67	22	46.86	630.331	570.651	347.816	479.665	225.227	247.435	421.622	480.559	416.703	407.969	422.798
PPP2CA	P67775	PP2AA_HUMAN	Serine/threonine-protein phosphatase 2A catalytic subunit alpha isoform OS=Homo sapiens OX=9606 GN=PPP2CA PE=1 SV=1	5.18	36164.5	1782.36	13	58.9	342.053	343.203	285.086	310.06	256.847	233.75	380.412	356.534	152.496	236.833	289.727
PPP2CB	P62714	PP2AB_HUMAN	Serine/threonine-protein phosphatase 2A catalytic subunit beta isoform OS=Homo sapiens OX=9606 GN=PPP2CB PE=1 SV=1	5.07	36145.4	1782.36	12	56.31	39.1036	43.8777	35.0314	37.2493	20.505	18.7792	48.0869	50.8611	17.6338	19.7823	33.091
PPP1CB	P62140	PP1B_HUMAN	Serine/threonine-protein phosphatase PP1-beta catalytic subunit OS=Homo sapiens OX=9606 GN=PPP1CB PE=1 SV=3	5.79	37985.3	2098.01	9	38.23	224.68	202.372	233.942	255.005	218.948	198.621	265.073	256.264	253.783	187.638	229.633
PPP1CC	P36873	PP1G_HUMAN	Serine/threonine-protein phosphatase PP1-gamma catalytic subunit OS=Homo sapiens OX=9606 GN=PPP1CC PE=1 SV=1	6.13	37725.2	1965.28	7	30.34	48.0367	49.8654	57.5427	61.675	52.1939	40.4531	57.1076	55.4169	57.6551	49.8077	52.9754
STRAP	Q9Y3F4	STRAP_HUMAN	Serine-threonine kinase receptor-associated protein OS=Homo sapiens OX=9606 GN=STRAP PE=1 SV=1	4.81	38780.5	1200.3	7	32.86	154.081	177.673	122.506	120.338	77.4622	56.9575	157.8	125.465	73.555	51.5263	111.736
TF	P02787	TRFE_HUMAN	Serotransferrin OS=Homo sapiens OX=9606 GN=TF PE=1 SV=3	6.78	79345.1	1427.68	23	47.28	6090.27	6762.31	6200.82	942.784	7008.46	7646.87	6319.13	6148.98	860.506	5418.72	5339.89
SHTN1	A0MZ66	SHOT1_HUMAN	Shootin-1 OS=Homo sapiens OX=9606 GN=SHTN1 PE=1 SV=4	5.1	72153.2	259.1	5	8.72	190.437	220.534	267.436	275.876	183.226	168.167	306.26	265.672	255.143	248.65	238.14
SFXN1	Q9H9B4	SFXN1_HUMAN	Sideroflexin-1 OS=Homo sapiens OX=9606 GN=SFXN1 PE=1 SV=4	9.41	35904.6	1184.14	10	49.69	212.525	182.437	260.71	245.89	175.146	167.813	355.201	282.308	159.837	185.568	222.744
SFXN3	Q9BWM7	SFXN3_HUMAN	Sideroflexin-3 OS=Homo sapiens OX=9606 GN=SFXN3 PE=1 SV=3	9.37	35845.6	660.927	5	22.12	65.0282	18.56	44.0282	56.1449	55.011	44.8916	60.3249	54.7497	64.1382	35.2377	49.8114
SIRPB1	Q5TFQ8	SIRBL_HUMAN	Signal-regulatory protein beta-1 isoform 3 OS=Homo sapiens OX=9606 GN=SIRPB1 PE=1 SV=1	7.72	43701.5	1955.89	11	41.21	485.649	451.604	513.069	525.073	636.689	627.201	530.49	538.312	507.516	528.428	534.403
SSBP1	Q04837	SSBP_HUMAN	Single-stranded DNA-binding protein_ mitochondrial OS=Homo sapiens OX=9606 GN=SSBP1 PE=1 SV=1	10.04	17259.7	1239.45	3	32.43	51.3723	58.2189	59.5526	55.6652	34.7694	33.1205	42.7293	43.3826	39.9146	38.9761	45.7702
SNRPD3	P62318	SMD3_HUMAN	Small nuclear ribonucleoprotein Sm D3 OS=Homo sapiens OX=9606 GN=SNRPD3 PE=1 SV=1	10.97	14030.4	1486.2	2	15.08	37.3732	34.876	30.5516	35.1677	25.1568	35.0494	23.7812	19.817	74.5305	71.8596	38.8163
SVIP	Q8NHG7	SVIP_HUMAN	Small VCP/p97-interacting protein OS=Homo sapiens OX=9606 GN=SVIP PE=1 SV=1	9.51	8556.74	9603.88	2	32.47	338.879	220.051	248.729	218.024	334.698	282.279	248.448	207.316	394.664	344.98	283.807
ATP1A1	P05023	AT1A1_HUMAN	Sodium/potassium-transporting ATPase subunit alpha-1 OS=Homo sapiens OX=9606 GN=ATP1A1 PE=1 SV=1	5.17	114208	18674.4	44	48.19	13617.3	12065.3	11569.9	12294.9	14404.6	13668.7	12076.5	11463.6	11677.5	11857.8	12469.6
ATP1A2	P50993	AT1A2_HUMAN	Sodium/potassium-transporting ATPase subunit alpha-2 OS=Homo sapiens OX=9606 GN=ATP1A2 PE=1 SV=1	5.33	113577	10594.9	29	42.45	604.748	858.256	633.305	619.442	671.325	668.663	596.558	578.636	612.863	621.817	646.561
ATP1A3	P13637	AT1A3_HUMAN	Sodium/potassium-transporting ATPase subunit alpha-3 OS=Homo sapiens OX=9606 GN=ATP1A3 PE=1 SV=3	5.06	113174	20151.4	48	56.27	13418.4	11164.3	11747	12061.5	15552.8	14848.2	13547.3	13104	13616.2	14477.3	13353.7
ATP1A4	Q13733	AT1A4_HUMAN	Sodium/potassium-transporting ATPase subunit alpha-4 OS=Homo sapiens OX=9606 GN=ATP1A4 PE=1 SV=3	6.23	115193	5253.48	11	17.78	180.655	173.336	170.723	160.293	236.284	252.068	165.443	174.798	248.53	215.377	197.751
ATP1B1	P05026	AT1B1_HUMAN	Sodium/potassium-transporting ATPase subunit beta-1 OS=Homo sapiens OX=9606 GN=ATP1B1 PE=1 SV=1	8.68	35460.5	24355.3	16	54.79	5859.93	5951.25	5464.29	5544.28	5983.79	5689.87	5786.65	5370.16	5527.72	5820.59	5699.85
SLC12A2	P55011	S12A2_HUMAN	Solute carrier family 12 member 2 OS=Homo sapiens OX=9606 GN=SLC12A2 PE=1 SV=1	5.98	132132	1330.05	26	30.86	3385.24	2803.44	1505.31	1420.38	1227.15	6508.57	1240.7	1676.48	1599.25	1484.58	2285.11
SORD	Q00796	DHSO_HUMAN	Sorbitol dehydrogenase OS=Homo sapiens OX=9606 GN=SORD PE=1 SV=4	7.91	38951.9	3685.54	12	56.86	287.927	263.172	556.703	578.618	622.21	559.18	204.563	271.334	277.099	304.859	392.566
SRI	P30626	SORCN_HUMAN	Sorcin OS=Homo sapiens OX=9606 GN=SRI PE=1 SV=1	5.17	21961.6	491.794	3	22.73	47.6173	37.3763	59.2476	69.3828	47.0515	69.5016	58.314	62.0151	71.9354	63.0188	58.546
SORT1	Q99523	SORT_HUMAN	Sortilin OS=Homo sapiens OX=9606 GN=SORT1 PE=1 SV=3	5.36	93037.3	732.922	12	18.53	782.14	748.281	1054.26	1256.39	1273.85	1202.59	913.866	892.345	946.774	1158	1022.85
SNX1	Q13596	SNX1_HUMAN	Sorting nexin-1 OS=Homo sapiens OX=9606 GN=SNX1 PE=1 SV=3	4.9	59183.6	288.546	3	7.09	188.382	189.52	165.5	167.254	93.5821	78.6933	130.799	127.186	95.5815	129.7	136.62
SPTAN1	Q13813	SPTN1_HUMAN	Spectrin alpha chain_ non-erythrocytic 1 OS=Homo sapiens OX=9606 GN=SPTAN1 PE=1 SV=3	5.06	285338	4193.37	136	72.29	13666.8	12970.3	10604.5	13394.2	12962.8	12490.7	11269.7	10120	7396.89	12783.8	11766
SPTBN1	Q01082	SPTB2_HUMAN	Spectrin beta chain_ non-erythrocytic 1 OS=Homo sapiens OX=9606 GN=SPTBN1 PE=1 SV=2	5.26	275408	5821.8	118	64.47	9807.09	13007.2	8875.07	9383.79	7019.54	7076.34	8908.11	9526.61	5752.38	5611.79	8496.79
SPTBN2	O15020	SPTN2_HUMAN	Spectrin beta chain_ non-erythrocytic 2 OS=Homo sapiens OX=9606 GN=SPTBN2 PE=1 SV=3	5.74	272694	335.666	15	7.62	696.101	682.238	456.969	413.833	381.505	336.333	942.106	737.438	260.726	215.566	512.282
SPTBN4	Q9H254	SPTN4_HUMAN	Spectrin beta chain_ non-erythrocytic 4 OS=Homo sapiens OX=9606 GN=SPTBN4 PE=1 SV=2	5.65	290183	244.898	4	1.4	9191.56	8563.19	11374.7	10817.7	12826.7	8952.65	9000.78	10182	12097.3	13400.7	10640.7
SKP1	P63208	SKP1_HUMAN	S-phase kinase-associated protein 1 OS=Homo sapiens OX=9606 GN=SKP1 PE=1 SV=2	4.2	18829.1	836.72	3	29.45	49.1784	41.5356	43.8573	53.2334	30.6133	27.0128	45.3171	38.7723	40.3772	35.9127	40.581
S1PR5	Q9H228	S1PR5_HUMAN	Sphingosine 1-phosphate receptor 5 OS=Homo sapiens OX=9606 GN=S1PR5 PE=2 SV=1	9.95	42573.6	862.772	5	17.59	147.82	135.205	241.376	277.673	272.679	269.343	83.3253	122.287	231.98	270.252	205.194
SRCIN1	Q9C0H9	SRCN1_HUMAN	SRC kinase signaling inhibitor 1 OS=Homo sapiens OX=9606 GN=SRCIN1 PE=1 SV=4	9.9	127276	937.564	26	30.6	828.776	873.352	1004.96	1141.12	1275.64	1270.84	795.9	734.086	1505.02	1656.23	1108.59
STK39	Q9UEW8	STK39_HUMAN	STE20/SPS1-related proline-alanine-rich protein kinase OS=Homo sapiens OX=9606 GN=STK39 PE=1 SV=3	5.89	59987.4	1722.44	11	30.64	428.53	475.804	444.479	476.231	411.732	450.735	452.67	415.955	280.216	300.015	413.637
HSPA9	P38646	GRP75_HUMAN	Stress-70 protein_ mitochondrial OS=Homo sapiens OX=9606 GN=HSPA9 PE=1 SV=2	5.8	73965.8	1338.71	19	44.62	406.578	384.324	459.495	461.195	224.945	233.069	648.718	564.17	264.015	245.911	389.242
SDHA	P31040	SDHA_HUMAN	Succinate dehydrogenase [ubiquinone] flavoprotein subunit_ mitochondrial OS=Homo sapiens OX=9606 GN=SDHA PE=1 SV=2	7.07	73718.1	692.401	11	34.49	422.99	496.997	425.602	481.57	223.394	250.337	430.984	470.291	202.325	225.325	362.981
SDHB	P21912	SDHB_HUMAN	Succinate dehydrogenase [ubiquinone] iron-sulfur subunit_ mitochondrial OS=Homo sapiens OX=9606 GN=SDHB PE=1 SV=3	8.83	32428.2	530.899	5	20	99.0039	99.624	71.3667	98.2788	62.8723	76.0439	90.7686	94.3442	79.5516	58.6226	83.0477
SUCLG1	P53597	SUCA_HUMAN	Succinate--CoA ligase [ADP/GDP-forming] subunit alpha_ mitochondrial OS=Homo sapiens OX=9606 GN=SUCLG1 PE=1 SV=4	9.01	36649	604.489	4	18.5	186.302	182.341	181.06	161.997	127.254	126.381	228.751	200.176	129.117	126.224	164.96
SUCLA2	Q9P2R7	SUCB1_HUMAN	Succinate--CoA ligase [ADP-forming] subunit beta_ mitochondrial OS=Homo sapiens OX=9606 GN=SUCLA2 PE=1 SV=3	7.22	50659.5	581.747	7	20.3	217.823	254.77	297.581	253.275	116.777	133.242	342.081	346.054	150.625	170.101	228.233
ALDH5A1	P51649	SSDH_HUMAN	Succinate-semialdehyde dehydrogenase_ mitochondrial OS=Homo sapiens OX=9606 GN=ALDH5A1 PE=1 SV=2	8.24	58070.2	2127.13	16	45.42	386.714	415.512	553.053	539.707	723.714	707.343	674.763	703.843	555.447	418.851	567.895
OXCT1	P55809	SCOT1_HUMAN	Succinyl-CoA:3-ketoacid coenzyme A transferase 1_ mitochondrial OS=Homo sapiens OX=9606 GN=OXCT1 PE=1 SV=1	7.24	56614	412.109	8	23.46	146.919	141.408	223.971	235.684	113.248	115.835	219.797	209.953	158.925	137.768	170.351
SOD2	P04179	SODM_HUMAN	Superoxide dismutase [Mn]_ mitochondrial OS=Homo sapiens OX=9606 GN=SOD2 PE=1 SV=3	8.41	24921.3	2134.97	8	38.29	285.469	222.059	332.296	318.976	338.56	362.183	403.541	417.327	428.616	383.314	349.234
SBSN	Q6UWP8	SBSN_HUMAN	Suprabasin OS=Homo sapiens OX=9606 GN=SBSN PE=1 SV=2	6.56	60597.9	910.538	2	6.1		407.568	67.6436	91.3526			63.1319	387.832			203.506
SYN1	P17600	SYN1_HUMAN	Synapsin-1 OS=Homo sapiens OX=9606 GN=SYN1 PE=1 SV=3	10.4	74282.6	552.784	14	30.78	282.434	256.036	248.568	224.255	256.71	256.544	288.34	252.529	239.871	219.001	252.429
SYN2	Q92777	SYN2_HUMAN	Synapsin-2 OS=Homo sapiens OX=9606 GN=SYN2 PE=2 SV=4	8.58	63281.6	466.552	4	8.42	179.003	160.519	164.3	154.829	130.656	126.254	173.244	156.453	144.558	133.77	152.359
VAT1	Q99536	VAT1_HUMAN	Synaptic vesicle membrane protein VAT-1 homolog OS=Homo sapiens OX=9606 GN=VAT1 PE=1 SV=2	5.88	42148.5	3373.02	16	57	848.339	912.691	458.116	430.961	626.64	576.666	692.523	624.479	856.059	900.766	692.724
YKT6	O15498	YKT6_HUMAN	Synaptobrevin homolog YKT6 OS=Homo sapiens OX=9606 GN=YKT6 PE=1 SV=1	6.55	22588.7	623.536	5	33.84	65.4245	69.981	61.1972	81.6858	69.5321	68.4625	63.6195	69.009	93.4556	92.1384	73.4506
SYNGR2	O43760	SNG2_HUMAN	Synaptogyrin-2 OS=Homo sapiens OX=9606 GN=SYNGR2 PE=1 SV=1	4.55	25095.2	651.289	2	7.14	109.747	97.3694	177.78	179.063	128.209	115.95	139.434	116.808	167.032	154.982	138.637
SYP	P08247	SYPH_HUMAN	Synaptophysin OS=Homo sapiens OX=9606 GN=SYP PE=1 SV=3	4.46	34130.4	959.51	3	10.22	189.745	177.471	126.727	193.693	202.953	190.85	174.969	167.15	205.743	202.81	183.211
SNAP25	P60880	SNP25_HUMAN	Synaptosomal-associated protein 25 OS=Homo sapiens OX=9606 GN=SNAP25 PE=1 SV=1	4.46	23543.3	4750.56	14	70.39	307.696	173.051	400.291	207.876	305.029	168.934	343.829	188.15	343.011	176.528	261.44
SYT1	P21579	SYT1_HUMAN	Synaptotagmin-1 OS=Homo sapiens OX=9606 GN=SYT1 PE=1 SV=1	8.23	47915.4	556.097	8	20.62	136.725	120.23	159.236	177.128	118.5	126.498	132.896	132.11	148.476	153.03	140.483
STX1A	Q16623	STX1A_HUMAN	Syntaxin-1A OS=Homo sapiens OX=9606 GN=STX1A PE=1 SV=1	4.96	33194.6	4905.56	12	54.17	213.197	212.431	531.551	579.254	549.32	479.518	347.61	344.748	466.582	513.369	423.758
STX1B	P61266	STX1B_HUMAN	Syntaxin-1B OS=Homo sapiens OX=9606 GN=STX1B PE=1 SV=1	5.09	33472.9	7302.94	14	58.33	934.057	1035.18	1028.93	1077.57	1256.73	1249.6	966.297	961.562	1309.99	1335.5	1115.54
STX4	Q12846	STX4_HUMAN	Syntaxin-4 OS=Homo sapiens OX=9606 GN=STX4 PE=1 SV=2	5.89	34294.1	687.699	8	39.06	93.8799	92.4486	119.157	129.042	139.719	134.134	92.2882	88.1789	146.338	148.129	118.331
STX7	O15400	STX7_HUMAN	Syntaxin-7 OS=Homo sapiens OX=9606 GN=STX7 PE=1 SV=4	5.26	29929.6	881.302	8	41.38	218.839	201.381	145.644	137.572	121.597	115.506	145.926	155.351	107.97	119.111	146.89
STXBP1	P61764	STXB1_HUMAN	Syntaxin-binding protein 1 OS=Homo sapiens OX=9606 GN=STXBP1 PE=1 SV=1	6.54	67968	14382.9	39	77.27	4383.55	4170.09	4159.1	4228.56	4815.69	4712.6	4258.46	3832.36	5208.74	4343.69	4411.28
STXBP2	Q15833	STXB2_HUMAN	Syntaxin-binding protein 2 OS=Homo sapiens OX=9606 GN=STXBP2 PE=1 SV=2	6.12	66908.9	356.805	3	3.2	989.632	892.351	1523.26	1507.48	1252.82	1416.36	1311.44	910.167	910.496	935.879	1164.99
STXBP3	O00186	STXB3_HUMAN	Syntaxin-binding protein 3 OS=Homo sapiens OX=9606 GN=STXBP3 PE=1 SV=2	7.71	68676.8	840.849	17	35.47	350.577	341.521	365.048	437.855	391.693	477.387	331.62	343.24	440.354	533.702	401.3
STXBP6	Q8NFX7	STXB6_HUMAN	Syntaxin-binding protein 6 OS=Homo sapiens OX=9606 GN=STXBP6 PE=1 SV=2	9.52	23839	3534.43	8	43.81	333.387	315.541	366.037	429.478	324.607	333.727	270.245	219.091	871.088	901.441	436.464
TCP1	P17987	TCPA_HUMAN	T-complex protein 1 subunit alpha OS=Homo sapiens OX=9606 GN=TCP1 PE=1 SV=1	5.73	60856.9	517.518	12	33.99	253.463	233.071	224.558	196.067	339.201	363.827	210.497	227.461	327.061	333.829	270.904
CCT2	P78371	TCPB_HUMAN	T-complex protein 1 subunit beta OS=Homo sapiens OX=9606 GN=CCT2 PE=1 SV=4	6.02	57830.5	872.701	16	50.28	344.335	336.794	256.678	238.821	180.777	157.129	841.207	319.473	217.368	200.282	309.286
CCT4	P50991	TCPD_HUMAN	T-complex protein 1 subunit delta OS=Homo sapiens OX=9606 GN=CCT4 PE=1 SV=4	7.79	58437.6	1178.12	12	31.17	352	377.307	282.688	293.835	199.174	213.817	321.751	339.287	248.86	264.263	289.298
CCT5	P48643	TCPE_HUMAN	T-complex protein 1 subunit epsilon OS=Homo sapiens OX=9606 GN=CCT5 PE=1 SV=1	5.31	60127.4	477.099	9	32.53	295.924	676.793	553.653	453.295	523.648	651.24	241.252	488.549	394.413	645.166	492.393
CCT7	Q99832	TCPH_HUMAN	T-complex protein 1 subunit eta OS=Homo sapiens OX=9606 GN=CCT7 PE=1 SV=2	7.53	59880	874.416	10	30.57	325.743	300.715	198.656	182.287	148.343	135.947	241.835	251.76	149.804	180.04	211.513
CCT3	P49368	TCPG_HUMAN	T-complex protein 1 subunit gamma OS=Homo sapiens OX=9606 GN=CCT3 PE=1 SV=4	6.09	61104.3	1238.37	17	43.85	402.009	441.372	397.437	324.522	219.979	208.249	438.156	413.247	222.873	248.545	331.639
CCT8	P50990	TCPQ_HUMAN	T-complex protein 1 subunit theta OS=Homo sapiens OX=9606 GN=CCT8 PE=1 SV=4	5.28	60191	459.594	6	15.33	175.827	172.718	146.345	128.226	78.6103	75.9689	109.984	105.771	137.568	123.771	125.479
CCT6A	P40227	TCPZ_HUMAN	T-complex protein 1 subunit zeta OS=Homo sapiens OX=9606 GN=CCT6A PE=1 SV=3	6.26	58480.5	978.923	9	29.38	299.804	311.503	261.993	238.734	173.588	167.674	285.447	287.799	189.703	185.622	240.187
TNR	Q92752	TENR_HUMAN	Tenascin-R OS=Homo sapiens OX=9606 GN=TNR PE=1 SV=3	4.52	151900	1568.5	28	29.09	2047.92	1956.71	1912.13	1809.99	2578.63	2442.1	2109.82	2114.56	2957.82	3375.44	2330.51
TSPAN15	O95858	TSN15_HUMAN	Tetraspanin-15 OS=Homo sapiens OX=9606 GN=TSPAN15 PE=1 SV=1	5.13	33906.4	1062.36	5	26.19	109.762	104.175	252.168	221.762	217.507	872.657	71.7984	126.959	252.179	288.538	251.75
TSPAN8	P19075	TSN8_HUMAN	Tetraspanin-8 OS=Homo sapiens OX=9606 GN=TSPAN8 PE=1 SV=1	5.32	26728.2	6372.74	7	35.02	1572.06	1572.5	721.129	730.409	1751.85	1608.46	1375.78	1439.57	2324.7	2426.5	1552.3
PRDX3	P30048	PRDX3_HUMAN	Thioredoxin-dependent peroxide reductase_ mitochondrial OS=Homo sapiens OX=9606 GN=PRDX3 PE=1 SV=3	7.7	28034.8	4472.39	10	60.55	621.712	602.821	521.726	552.457	413.763	422.021	655.221	671.32	494.63	481.949	543.762
TST	Q16762	THTR_HUMAN	Thiosulfate sulfurtransferase OS=Homo sapiens OX=9606 GN=TST PE=1 SV=4	6.9	33657.1	379.155	3	32.66	112.608	61.2466	139.463	129.068	70.8285	80.5983	73.3752	87.9124	100.926	118.982	97.5009
THY1	P04216	THY1_HUMAN	Thy-1 membrane glycoprotein OS=Homo sapiens OX=9606 GN=THY1 PE=1 SV=2	8.94	18162.9	10338.5	4	35.4	1461.3	1521.91	1848.02	1689.41	1940	1930.36	1688.35	1666.57	1893.09	1900.49	1753.95
TJP2	Q9UDY2	ZO2_HUMAN	Tight junction protein ZO-2 OS=Homo sapiens OX=9606 GN=TJP2 PE=1 SV=2	7.05	134186	566.101	21	29.33	570.815	634.17	1057.81	859.988	859.661	878.538	611.031	655.155	671.397	935.756	773.432
TOLLIP	Q9H0E2	TOLIP_HUMAN	Toll-interacting protein OS=Homo sapiens OX=9606 GN=TOLLIP PE=1 SV=1	5.6	30510	633.029	3	17.52	70.41	63.3168	80.2835	64.996	71.6512	62.0242	92.8742	92.6326	74.3931	83.3721	75.5954
TALDO1	P37837	TALDO_HUMAN	Transaldolase OS=Homo sapiens OX=9606 GN=TALDO1 PE=1 SV=2	6.41	37711.3	371.474	4	12.17	252.895	270.783	320.359	283.29	341.792	263.081	261	200.84	430.146	417.977	304.216
PURA	Q00577	PURA_HUMAN	Transcriptional activator protein Pur-alpha OS=Homo sapiens OX=9606 GN=PURA PE=1 SV=2	6.05	35024.9	716.569	5	30.12	164.955	162.434	141.206	163.39	80.6538	93.5241	175.387	175.089	107.599	83.5934	134.783
RHOA	P61586	RHOA_HUMAN	Transforming protein RhoA OS=Homo sapiens OX=9606 GN=RHOA PE=1 SV=1	5.75	22110.3	15459.9	10	77.2	990.619	855.62	1196.07	1179.37	1258.62	1254.71	1096.95	1028.4	1160.55	1243.99	1126.49
TAGLN3	Q9UI15	TAGL3_HUMAN	Transgelin-3 OS=Homo sapiens OX=9606 GN=TAGLN3 PE=1 SV=2	7.19	22643.8	1566.4	5	37.19	92.6421	82.3984	63.5235	54.3228	54.4935	58.7259	74.8819	65.4506	89.9567	75.089	71.1484
VCP	P55072	TERA_HUMAN	Transitional endoplasmic reticulum ATPase OS=Homo sapiens OX=9606 GN=VCP PE=1 SV=4	4.96	90006.3	2816.84	28	55.46	1144.85	1055.97	1157.77	1166.41	986.798	997.785	961.264	1055.49	1110.32	1069.21	1070.59
TKT	P29401	TKT_HUMAN	Transketolase OS=Homo sapiens OX=9606 GN=TKT PE=1 SV=3	7.49	68562.1	18685	33	73.35	6375.05	6248.18	7457.16	7584.6	9515.65	9280.11	6025.78	5495.5	7866.3	6360.93	7220.93
TMEM222	Q9H0R3	TM222_HUMAN	Transmembrane protein 222 OS=Homo sapiens OX=9606 GN=TMEM222 PE=1 SV=2	6.08	23629.2	893.778	3	30.29	70.6813	75.1316	116.487	117.053	123.84	122.901	91.5776	79.5259	153.058	153.863	110.412
HADHA	P40939	ECHA_HUMAN	Trifunctional enzyme subunit alpha_ mitochondrial OS=Homo sapiens OX=9606 GN=HADHA PE=1 SV=2	9.49	83741.2	1925.18	24	52.69	428.831	395.216	948.241	895.464	744.67	816.778	893.58	932.068	334.862	293.599	668.331
HADHB	P55084	ECHB_HUMAN	Trifunctional enzyme subunit beta_ mitochondrial OS=Homo sapiens OX=9606 GN=HADHB PE=1 SV=3	9.93	51579.7	1122.86	17	51.69	155.207	174.484	315.272	349.13	120.737	151.673	319.033	315.878	93.5653	134.696	212.967
TPI1	P60174	TPIS_HUMAN	Triosephosphate isomerase OS=Homo sapiens OX=9606 GN=TPI1 PE=1 SV=3	5.56	31076.2	3936.57	14	70.98	365.384	330.273	360.238	313.42	285.965	297.065	372.615	353.971	481.12	472.169	363.222
TRIM2	Q9C040	TRIM2_HUMAN	Tripartite motif-containing protein 2 OS=Homo sapiens OX=9606 GN=TRIM2 PE=1 SV=1	6.55	82556.8	703.214	12	23.52	697.233	693.667	917.902	893.827	531.144	595.371	942.918	959.626	689.214	752.952	767.385
TPP1	O14773	TPP1_HUMAN	Tripeptidyl-peptidase 1 OS=Homo sapiens OX=9606 GN=TPP1 PE=1 SV=2	6.04	61761.2	818.465	7	25.04	456.914	411.804	496.048	480.358	279.843	275.583	326.528	292.58	376.231	382.294	377.818
TUBAL3	A6NHL2	TBAL3_HUMAN	Tubulin alpha chain-like 3 OS=Homo sapiens OX=9606 GN=TUBAL3 PE=1 SV=2	5.65	50707.2	2234.39	6	22.42	862.898	1339.9	1286.94	893.167	913.419	867.825	1193.52	1219.41	1270.35	1386.3	1123.37
TUBA4A	P68366	TBA4A_HUMAN	Tubulin alpha-4A chain OS=Homo sapiens OX=9606 GN=TUBA4A PE=1 SV=1	4.75	50665.8	29508.8	23	80.13	9996.88	10129.5	11987.4	11109.7	9273.86	10095.7	12077.8	9173.95	10365.3	9747.74	10395.8
TUBA8	Q9NY65	TBA8_HUMAN	Tubulin alpha-8 chain OS=Homo sapiens OX=9606 GN=TUBA8 PE=1 SV=1	4.76	50778	23943.3	17	55.23	755.103	704.388	733.638	722.339	583.621	613.585	665.464	732.281	660.317	579.042	674.978
TUBB	P07437	TBB5_HUMAN	Tubulin beta chain OS=Homo sapiens OX=9606 GN=TUBB PE=1 SV=2	4.59	50127.2	34424	23	65.77	7696.06	7930.48	6337.62	7213.8	5393.43	5476.51	7344.61	7187.53	4308.1	4055.61	6294.37
TUBB2A	Q13885	TBB2A_HUMAN	Tubulin beta-2A chain OS=Homo sapiens OX=9606 GN=TUBB2A PE=1 SV=1	4.59	50306.3	26556.3	23	73.26	8114.12	7830.37	6763.91	6611.01	5516.66	5124.03	7363.19	8355.51	5891.12	5451.68	6702.16
TUBB2B	Q9BVA1	TBB2B_HUMAN	Tubulin beta-2B chain OS=Homo sapiens OX=9606 GN=TUBB2B PE=1 SV=1	4.59	50409.4	27133.9	23	73.26	4851.14	4825.52	3935.49	4079.25	2960.11	3052.68	4541.36	4490.13	3479.32	3298.44	3951.34
TUBB3	Q13509	TBB3_HUMAN	Tubulin beta-3 chain OS=Homo sapiens OX=9606 GN=TUBB3 PE=1 SV=2	4.64	50889	29490.8	25	77.11	8923.09	8724.95	4894.33	4634.04	3587.57	3620.25	6469.11	5858.23	3124.49	3196.34	5303.24
TUBB4A	P04350	TBB4A_HUMAN	Tubulin beta-4A chain OS=Homo sapiens OX=9606 GN=TUBB4A PE=1 SV=2	4.59	50042.1	38483.2	23	72.75	13778.3	13142.7	15572.8	14662.3	12130.1	12632.6	15417.8	14071.7	13405.7	13415.3	13822.9
TUBB4B	P68371	TBB4B_HUMAN	Tubulin beta-4B chain OS=Homo sapiens OX=9606 GN=TUBB4B PE=1 SV=1	4.6	50287.4	36104.8	22	72.13	3321.11	3360.2	3435.92	3260.25	2278.04	1664.22	3556.16	3101.7	2259.69	2262.21	2849.95
TUBB6	Q9BUF5	TBB6_HUMAN	Tubulin beta-6 chain OS=Homo sapiens OX=9606 GN=TUBB6 PE=1 SV=1	4.58	50313.5	19074	16	54.04	689.04	683.067	630.579	573.704	1247.61	1123.53	1113.4	1015.03	477.985	573.834	812.778
TUBB8	Q3ZCM7	TBB8_HUMAN	Tubulin beta-8 chain OS=Homo sapiens OX=9606 GN=TUBB8 PE=1 SV=2	4.6	50289.4	17023.4	9	34.01	127.362	168.247	181.718	184.976	253.112	210.401	251.512	143.707	191.094	166.263	187.839
TPPP3	Q9BW30	TPPP3_HUMAN	Tubulin polymerization-promoting protein family member 3 OS=Homo sapiens OX=9606 GN=TPPP3 PE=1 SV=1	9.69	19156.6	9245.79	9	44.32	466.452	379.574	1164.86	634.089	1094.14	658.46	532.296	433.741	616.076	361.548	634.124
TPPP	O94811	TPPP_HUMAN	Tubulin polymerization-promoting protein OS=Homo sapiens OX=9606 GN=TPPP PE=1 SV=1	10.11	23864.8	10554.8	11	52.51	1476.28	1720.85	3004.93	2877.18	2504.95	2510.46	2762.79	2622.86	2529.63	2665.74	2467.57
TBCB	Q99426	TBCB_HUMAN	Tubulin-folding cofactor B OS=Homo sapiens OX=9606 GN=TBCB PE=1 SV=2	4.87	27610.7	1443.81	5	29.1	128.667	131.589	92.5229	87.3881	51.8039	65.2498	107.196	100.346	103.865	82.8746	95.1501
TPD52	P55327	TPD52_HUMAN	Tumor protein D52 OS=Homo sapiens OX=9606 GN=TPD52 PE=1 SV=2	4.59	24384.1	344.314	2	9.38	58.7683	39.6537	65.9221	60.7769	36.8338	28.5966	49.0411	42.7207	53.345	45.0613	48.0719
FYN	P06241	FYN_HUMAN	Tyrosine-protein kinase Fyn OS=Homo sapiens OX=9606 GN=FYN PE=1 SV=3	6.25	61275.3	641.714	12	34.08	161.305	118.461	261.952	276.75	262.859	242.12	396.544	428.683	202.024	226.754	257.745
HCK	P08631	HCK_HUMAN	Tyrosine-protein kinase HCK OS=Homo sapiens OX=9606 GN=HCK PE=1 SV=5	6.29	60113.2	361.547	2	3.99	382.05	340.464	359.16	509.106	517.206	548.118	339.464	428.572	259.363	483.092	416.66
YES1	P07947	YES_HUMAN	Tyrosine-protein kinase Yes OS=Homo sapiens OX=9606 GN=YES1 PE=1 SV=3	6.34	61314.6	733.086	13	28.73	152.544	160.49	251.107	297.861	224.629	173.439	150.71	175.605	145.4	176.848	190.863
SIRPA	P78324	SHPS1_HUMAN	Tyrosine-protein phosphatase non-receptor type substrate 1 OS=Homo sapiens OX=9606 GN=SIRPA PE=1 SV=2	6.58	55480.2	2846.83	19	57.34	556.592	561.052	682.128	787.019	804.903	895.585	728.438	755.384	826.307	864.312	746.172
USP5	P45974	UBP5_HUMAN	Ubiquitin carboxyl-terminal hydrolase 5 OS=Homo sapiens OX=9606 GN=USP5 PE=1 SV=2	4.72	96698.9	1709.03	25	51.05	1446.47	1455.56	1499.32	1351.28	764.432	843.181	1519.37	1439.18	312.605	245.737	1087.71
UCHL1	P09936	UCHL1_HUMAN	Ubiquitin carboxyl-terminal hydrolase isozyme L1 OS=Homo sapiens OX=9606 GN=UCHL1 PE=1 SV=2	5.19	25166.6	3477.54	9	56.95	458.853	424.259	149.704	188.411	208.859	138.925	253.825	317.132	333.596	351.022	282.459
OTUB1	Q96FW1	OTUB1_HUMAN	Ubiquitin thioesterase OTUB1 OS=Homo sapiens OX=9606 GN=OTUB1 PE=1 SV=2	4.66	31512.2	937.082	8	35.42	179.71	168.378	69.4964	87.5689	47.3225	51.3247	151.907	156.492	40.0123	38.216	99.0427
RPS27A	P62979	RS27A_HUMAN	Ubiquitin-40S ribosomal protein S27a OS=Homo sapiens OX=9606 GN=RPS27A PE=1 SV=2	10.24	18307.1	14261.5	10	59.62	1517.22	1626.81	1997.41	1932.65	1794.36	1644.53	1406.08	1399.85	2272.79	2570.89	1816.26
UBE2V1	Q13404	UB2V1_HUMAN	Ubiquitin-conjugating enzyme E2 variant 1 OS=Homo sapiens OX=9606 GN=UBE2V1 PE=1 SV=2	8.18	16609.1	676.566	4	24.49	58.6492	57.3447	52.0749	39.6032	66.1081	50.5121	52.5461	59.968	68.9052	65.0289	57.074
UBA1	P22314	UBA1_HUMAN	Ubiquitin-like modifier-activating enzyme 1 OS=Homo sapiens OX=9606 GN=UBA1 PE=1 SV=3	5.39	118933	713.005	15	23.25	289.399	312.148	324.731	323.471	387.707	376.246	669.286	645.564	379.135	429.802	413.749
UBXN6	Q9BZV1	UBXN6_HUMAN	UBX domain-containing protein 6 OS=Homo sapiens OX=9606 GN=UBXN6 PE=1 SV=1	6.51	50038.9	826.476	8	33.11	162	161.015	201.425	187.675	204.011	197.604	192.017	180.736	123.018	103.602	171.31
CMPK1	P30085	KCY_HUMAN	UMP-CMP kinase OS=Homo sapiens OX=9606 GN=CMPK1 PE=1 SV=3	5.27	22450.5	452.125	4	28.06	57.6076	54.9124	45.3838	32.0909	30.72	38.1486	73.7493	67.5631			50.022
C1orf198	Q9H425	CA198_HUMAN	Uncharacterized protein C1orf198 OS=Homo sapiens OX=9606 GN=C1orf198 PE=1 SV=1	5.44	36460.6	531.782	5	20.49	162.336	142.526	227.889	204.016	136.489	142.598	78.5918	98.3535	123.778	120.283	143.686
MYO1D	O94832	MYO1D_HUMAN	Unconventional myosin-Id OS=Homo sapiens OX=9606 GN=MYO1D PE=1 SV=2	9.85	117001	3803.18	55	63.62	2270.3	2407	2751.53	2754.99	3213.23	3002.87	2452.05	2393.9	2939.13	3101.45	2728.64
MYO5A	Q9Y4I1	MYO5A_HUMAN	Unconventional myosin-Va OS=Homo sapiens OX=9606 GN=MYO5A PE=1 SV=2	8.57	217116	868.538	32	26.52	2074.65	1856.96	2341.75	2419.25	5043.87	6060.5	4624.57	5489.89	2089.87	2104.95	3410.63
MYO5C	Q9NQX4	MYO5C_HUMAN	Unconventional myosin-Vc OS=Homo sapiens OX=9606 GN=MYO5C PE=1 SV=2	7.53	204122	589.778	6	3.9	2447.63	4837.27	2823.36	3279.57	1236.59	2367.83	3507.22	5802.8	1575.25	4108.99	3198.65
MYO18A	Q92614	MY18A_HUMAN	Unconventional myosin-XVIIIa OS=Homo sapiens OX=9606 GN=MYO18A PE=1 SV=3	5.92	234313	406.271	20	17.19	624.75	619.063	948.094	948.662	751.148	743.388	797.62	719.878	579.231	681.85	741.368
VPS13C	Q709C8	VP13C_HUMAN	Vacuolar protein sorting-associated protein 13C OS=Homo sapiens OX=9606 GN=VPS13C PE=1 SV=1	6.4	424729	361.088	2	1.25	2181.64	520.935		1682.99	1552.38		1934.33	2389.13	1694.45	3803.45	1969.91
VPS35	Q96QK1	VPS35_HUMAN	Vacuolar protein sorting-associated protein 35 OS=Homo sapiens OX=9606 GN=VPS35 PE=1 SV=2	5.18	92505.6	331.83	6	9.17	362.026	339.394	295.764	295.093	200.02	169.222	368.479	321.143	196.521	181.422	272.908
VPS4A	Q9UN37	VPS4A_HUMAN	Vacuolar protein sorting-associated protein 4A OS=Homo sapiens OX=9606 GN=VPS4A PE=1 SV=1	7.77	49183.1	424.474	3	8.24	153.208	150.682	140.353	138.851	166.592	130.536	143.591	151.131	182.374	183.925	154.124
VCAN	P13611	CSPG2_HUMAN	Versican core protein OS=Homo sapiens OX=9606 GN=VCAN PE=1 SV=3	4.24	374816	449.73	14	6.77	9655.63	9172.46	4805.35	4732.12	3976.21	3306.3	7273.48	6997.66	5967.87	6277.81	6216.49
HACD3	Q9P035	HACD3_HUMAN	Very-long-chain (3R)-3-hydroxyacyl-CoA dehydratase 3 OS=Homo sapiens OX=9606 GN=HACD3 PE=1 SV=2	9.24	43387.7	444.568	2	5.8	152.519	143.405	185.811	147.066	120.819	103.663	149.379	139.405	126.096	130.181	139.834
HSD17B12	Q53GQ0	DHB12_HUMAN	Very-long-chain 3-oxoacyl-CoA reductase OS=Homo sapiens OX=9606 GN=HSD17B12 PE=1 SV=2	9.78	34438.3	1862.72	8	41.67	280.289	225.594	280.994	326.652	163.654	173.28	307.106	290.672	225.864	213.65	248.775
VAMP2	P63027	VAMP2_HUMAN	Vesicle-associated membrane protein 2 OS=Homo sapiens OX=9606 GN=VAMP2 PE=1 SV=3	8.64	12719.8	4051.83	3	34.48	103.868	92.1257	137.261	127.202	111.029	99.6518	116.172	100.869	94.0797	123.582	110.584
VAMP3	Q15836	VAMP3_HUMAN	Vesicle-associated membrane protein 3 OS=Homo sapiens OX=9606 GN=VAMP3 PE=1 SV=3	9.41	11366.1	5170.22	3	40	72.5508	94.5609	114.152	108.687	94.2589	84.9249	74.5223	66.3734	87.7422	105.426	90.3198
VAPA	Q9P0L0	VAPA_HUMAN	Vesicle-associated membrane protein-associated protein A OS=Homo sapiens OX=9606 GN=VAPA PE=1 SV=3	8.94	28121.4	1866.96	9	53.01	254.153	254.186	261.195	290.956	196.848	209.482	250.683	209.464	194.698	207.559	232.922
VAPB	O95292	VAPB_HUMAN	Vesicle-associated membrane protein-associated protein B/C OS=Homo sapiens OX=9606 GN=VAPB PE=1 SV=3	7.14	27456.6	1389.03	9	45.68	336.894	187.924	322.805	214.37	114.269	124.842	405.345	151.049	173.65	110.021	214.117
NSF	P46459	NSF_HUMAN	Vesicle-fusing ATPase OS=Homo sapiens OX=9606 GN=NSF PE=1 SV=3	6.56	83107.8	8417.74	41	66.4	4072.11	4102.76	3899.87	3685.11	3057.1	3284.89	3886.4	4175.91	2889.71	2913.69	3596.76
SEC22B	O75396	SC22B_HUMAN	Vesicle-trafficking protein SEC22b OS=Homo sapiens OX=9606 GN=SEC22B PE=1 SV=4	6.53	24821.5	1369.91	6	38.14	111.191	98.1082	110.587	102.395	83.9439	67.5446	113.384	101.46	75.7851	73.2994	93.7697
VIM	P08670	VIME_HUMAN	Vimentin OS=Homo sapiens OX=9606 GN=VIM PE=1 SV=4	4.86	53708.8	7866.3	30	72.1	666.223	635.835	1412.06	1364.79	2183.94	2363.44	378.822	356.152	180.775	259.379	980.141
VSNL1	P62760	VISL1_HUMAN	Visinin-like protein 1 OS=Homo sapiens OX=9606 GN=VSNL1 PE=1 SV=2	4.82	22313.5	10467.1	16	85.34	770.823	604.409	500.86	445.893	520.797	516.876	596.132	569.191	538.809	542.334	560.612
VDAC1	P21796	VDAC1_HUMAN	Voltage-dependent anion-selective channel protein 1 OS=Homo sapiens OX=9606 GN=VDAC1 PE=1 SV=2	8.92	30886.7	7889.94	16	78.09	1503.79	1471.87	1581.06	1628.8	1080.83	1148.81	1661.64	1665.77	882.127	1036.9	1366.16
VDAC2	P45880	VDAC2_HUMAN	Voltage-dependent anion-selective channel protein 2 OS=Homo sapiens OX=9606 GN=VDAC2 PE=1 SV=2	7.48	32079.8	5343.67	16	73.47	1032.43	915.507	1154.52	1094.14	784.844	709.494	1204.84	1013.53	633.467	699.894	924.267
VDAC3	Q9Y277	VDAC3_HUMAN	Voltage-dependent anion-selective channel protein 3 OS=Homo sapiens OX=9606 GN=VDAC3 PE=1 SV=1	8.87	31000.9	3672.94	13	55.83	463.4	441.318	458.213	536.768	328.748	305.709	580.962	439.583	327.896	361.416	424.401
KCNAB2	Q13303	KCAB2_HUMAN	Voltage-gated potassium channel subunit beta-2 OS=Homo sapiens OX=9606 GN=KCNAB2 PE=1 SV=2	9.31	41285.4	4605.1	13	57.22	615.619	589.235	479.123	481.194	756.572	655.797	506.184	457.828	561.159	634.023	573.673
ATP6V1A	P38606	VATA_HUMAN	V-type proton ATPase catalytic subunit A OS=Homo sapiens OX=9606 GN=ATP6V1A PE=1 SV=2	5.19	68703.4	4517.51	23	59.64	1637.02	1603.29	770.237	726.917	1115.31	748.989	1513.43	1515.72	939.397	940.581	1151.09
ATP6V1B2	P21281	VATB2_HUMAN	V-type proton ATPase subunit B_ brain isoform OS=Homo sapiens OX=9606 GN=ATP6V1B2 PE=1 SV=3	5.46	56843	3644.26	20	55.97	1201.76	4230.81	4470.54	4271.32	411.401	428.821	4737.79	1169.88	4948.97	5578.76	3145.01
ATP6V1B1	P15313	VATB1_HUMAN	V-type proton ATPase subunit B_ kidney isoform OS=Homo sapiens OX=9606 GN=ATP6V1B1 PE=1 SV=3	5.32	57232.4	1493.46	8	21.05	320.654	292.946	101.166	98.641	123.184	126.211	289.537	277.273	123.437	126.663	187.971
ATP6V1C1	P21283	VATC1_HUMAN	V-type proton ATPase subunit C 1 OS=Homo sapiens OX=9606 GN=ATP6V1C1 PE=1 SV=4	7.33	44112.8	388.959	4	15.71	184.867	242.323	160.916	129.889	102.851	98.0155	213.785	233.492	250.859	153.34	177.034
ATP6V1D	Q9Y5K8	VATD_HUMAN	V-type proton ATPase subunit D OS=Homo sapiens OX=9606 GN=ATP6V1D PE=1 SV=1	10.01	28262.9	1112.72	4	18.62	140.479	130.743	35.8438	39.0636	44.0552	47.4443	109.789	117.197	59.0657	55.1067	77.8786
ATP6V1E1	P36543	VATE1_HUMAN	V-type proton ATPase subunit E 1 OS=Homo sapiens OX=9606 GN=ATP6V1E1 PE=1 SV=1	8.46	26202.4	2176.36	7	34.07	405.091	362.132	172.711	183.729	203.612	162.73	397.087	385.038	245.647	242.003	275.978
ATP6V1G2	O95670	VATG2_HUMAN	V-type proton ATPase subunit G 2 OS=Homo sapiens OX=9606 GN=ATP6V1G2 PE=1 SV=1	10.89	13661.4	3296.75	5	37.29	88.2545	77.1471	33.2528	31.4578	43.3873	32.626	98.7317	59.904	61.3666	43.8844	57.0012
ATP6V1H	Q9UI12	VATH_HUMAN	V-type proton ATPase subunit H OS=Homo sapiens OX=9606 GN=ATP6V1H PE=1 SV=1	6.07	56453.5	892.042	10	31.68	437.271	462.791	170.392	44.4264	145.952	146.631	357.143	453.869	166.598	201.985	258.706
WDR1	O75083	WDR1_HUMAN	WD repeat-containing protein 1 OS=Homo sapiens OX=9606 GN=WDR1 PE=1 SV=4	6.21	66877.9	711.152	13	40.59	579.787	585.988	371.907	371.222	368.539	347.849	438.332	306.822	421.562	441.278	423.329
ZNF469	Q96JG9	ZN469_HUMAN	Zinc finger protein 469 OS=Homo sapiens OX=9606 GN=ZNF469 PE=2 SV=3	7.5	414422	502.967	2	1.35	559.584	445.562	533.517	473.58	496.147	13477.3	696.874	601.447	53347.9		7847.99

## Sheet: 3_Lysate Myelin MSe (545)
gene name	accession	entry	description	IEP	mw	max score	reported peptides	sequence coverage	Control_L 1	Control_L 2	Control_L 3	Control_L 4	Control_L 5	Control_L 6	Control_L 7	Control_L 8	Control_L 9	Control_L 10	Control_M 1	Control_M 2	Control_M 3	Control_M 4	Control_M 5	Control_M 6	Control_M 7	Control_M 8	Control_M 9	Control_M 10	AVERAGE Control_L	AVERAGE Control_M
YWHAB	P31946	1433B_HUMAN	14-3-3 protein beta/alpha OS=Homo sapiens OX=9606 GN=YWHAB PE=1 SV=3	4.57	28196.5	6235.91	11	65.04	254.954	250.401	240.914	217.402	273.74	251.291	231.924	246.419	239.22	208.813	137.446	116.542	94.9963	79.951	61.9108	60.0928	90.0401	83.3993	80.2835	67.7051	241.508	87.2368
YWHAE	P62258	1433E_HUMAN	14-3-3 protein epsilon OS=Homo sapiens OX=9606 GN=YWHAE PE=1 SV=1	4.44	29345	10894	18	73.33	558.585	577.485	781.294	666.399	763.164	710.684	620.274	675.144	585.581	466.004	243.613	225.332	197.925	184.96	134.524	123.292	175.882	169.67	178.382	153.143	640.461	178.672
YWHAH	Q04917	1433F_HUMAN	14-3-3 protein eta OS=Homo sapiens OX=9606 GN=YWHAH PE=1 SV=4	4.56	28389.9	4146.16	8	53.25	105.731	111.257	89.0957	83.3813	149.824	108.442	97.9084	110.401	88.0359	103.267	93.9193	58.7907	45.8896	55.319	42.6646	37.9739	65.183	65.6977	60.8414	53.8031	104.734	58.0082
YWHAG	P61981	1433G_HUMAN	14-3-3 protein gamma OS=Homo sapiens OX=9606 GN=YWHAG PE=1 SV=2	4.61	28473.7	7337.06	14	74.9	490.3	462.814	329.124	288.98	461.258	380.981	370.033	399.767	397.031	316.376	294.456	271.047	111.301	105.332	72.4858	68.5428	130.062	129.027	91.1005	76.1815	389.667	134.954
SFN	P31947	1433S_HUMAN	14-3-3 protein sigma OS=Homo sapiens OX=9606 GN=SFN PE=1 SV=1	4.48	27888.2	3438.19	4	22.18	16.5884	16.6366	19.3824	16.7704	19.3987	16.6166	15.6292	15.4907	16.5749	11.3088	41.5653	34.4487	22.4878	26.7686	23.9923	25.9224	24.1131	31.082	24.4966	25.8962	16.4397	28.0773
YWHAQ	P27348	1433T_HUMAN	14-3-3 protein theta OS=Homo sapiens OX=9606 GN=YWHAQ PE=1 SV=1	4.48	28049.4	7245.6	13	64.9	212.546	202.556	316.434	294.357	316.112	275.411	246.468	276.646	262.188	227.884	86.1852	83.8184	96.4005	94.1356	62.1655	62.65	84.7444	87.0063	86.8263	79.4805	263.06	82.3413
YWHAZ	P63104	1433Z_HUMAN	14-3-3 protein zeta/delta OS=Homo sapiens OX=9606 GN=YWHAZ PE=1 SV=1	4.53	27916.2	17283.5	13	65.71	672.985	625.974	686.033	595.698	799.565	766.854	631.367	675.893	718.05	629.173	226.444	209.393	143.386	137.764	95.0246	92.7121	148.358	138.506	139.854	117.418	680.159	144.886
CNP	P09543	CN37_HUMAN	2'_3'-cyclic-nucleotide 3'-phosphodiesterase OS=Homo sapiens OX=9606 GN=CNP PE=1 SV=2	9.49	47977.9	89725	33	81.24	27489.8	26873.8	37340	33189.8	25536.3	32322.1	34392.9	36418.1	31364.7	32411.8	34924.1	32253.7	51192.9	52661.4	46483.6	45437.9	42631.2	45306.3	29727.1	39717.2	31733.9	42033.5
RPS7	P62081	RS7_HUMAN	40S ribosomal protein S7 OS=Homo sapiens OX=9606 GN=RPS7 PE=1 SV=1	10.85	22126.9	435.414	3	23.2	17.3935	34.0439	21.1737	25.194	28.969	27.4823	24.0689	22.0628	16.3889	17.6212	17.1117	10.5481	16.7584	18.9559				10.4079			23.4398	14.7564
SLC3A2	P08195	4F2_HUMAN	4F2 cell-surface antigen heavy chain OS=Homo sapiens OX=9606 GN=SLC3A2 PE=1 SV=3	4.7	68222.2	435.859	6	15.08	108.194	111.574	131.514	128.077	207.808	159.838	160.675	149.647	138.213	108.704	62.3008	69.9138	98.2969	72.1158	125.158	121.067	146.46	80.5161	113.947	120.806	140.424	101.058
ALDH9A1	P49189	AL9A1_HUMAN	4-trimethylaminobutyraldehyde dehydrogenase OS=Homo sapiens OX=9606 GN=ALDH9A1 PE=1 SV=3	5.57	54714.5	1112.84	13	37.04	211.33	207.054	321.352	311.048	353.346	277.742	233.847	226.447	195.952	165.071	55.2537	28.216	56.7407	48.0331	60.5041	48.6192	38.2932	30.6795	53.8204	49.6715	250.319	46.9831
HSPD1	P10809	CH60_HUMAN	60 kDa heat shock protein_ mitochondrial OS=Homo sapiens OX=9606 GN=HSPD1 PE=1 SV=2	5.56	61225.9	2319.41	23	56.37	405.563	422.589	520.654	449.326	540.399	428.841	498.51	485.205	413.752	321.762	245.062	219.281	304.598	285.618	173.014	179.103	285.604	263.966	208.808	179.213	448.66	234.427
RPLP1	P05386	RLA1_HUMAN	60S acidic ribosomal protein P1 OS=Homo sapiens OX=9606 GN=RPLP1 PE=1 SV=1	4	11628	1798.22	2	51.75	19.1507	12.0168	28.4889	20.9106	30.5891	23.5975	24.5734	28.4292	22.5814	17.8647	6.77102		10.6057	16.0814		8.00517	9.1369	7.347			22.8202	9.65787
PGD	P52209	6PGD_HUMAN	6-phosphogluconate dehydrogenase_ decarboxylating OS=Homo sapiens OX=9606 GN=PGD PE=1 SV=3	6.89	53653.3	1065.95	8	27.95	284.787	272.237	246.587	221.407	300.588	246.348	241.073	243.188	218.84	193.035	40.4084	39.1568	44.6885	43.6015	46.1385	32.5707	41.7857	39.2313	45.028	49.2355	246.809	42.1845
PGLS	O95336	6PGL_HUMAN	6-phosphogluconolactonase OS=Homo sapiens OX=9606 GN=PGLS PE=1 SV=2	5.67	27832	1108.8	5	29.84	57.7044	56.8358	79.06	69.3584	90.8474	73.0546	69.5359	68.9648	51.677	48.0031				15.1261	18.1388	16.0377		14.0058	29.336	20.436	66.5042	18.8467
ACAT2	Q9BWD1	THIC_HUMAN	Acetyl-CoA acetyltransferase_ cytosolic OS=Homo sapiens OX=9606 GN=ACAT2 PE=1 SV=2	6.52	41864.2	981.033	5	30.23	116.894	131.792	96.7805	90.0449	146.283	83.5255	64.1119	60.6292	62.5423	62.1103	28.0843	25.2177		22.7936		23.3837					91.4713	24.8698
ACAT1	P24752	THIL_HUMAN	Acetyl-CoA acetyltransferase_ mitochondrial OS=Homo sapiens OX=9606 GN=ACAT1 PE=1 SV=1	9.21	45484.8	585.423	5	17.33	94.8434	92.6722	107.348	99.3819	122.759	97.3368	111.224	104.472	103.01	79.9446	40.1401	38.7098	62.3514	54.7458	37.4715	41.2653	53.9845	48.1048	37.4115	37.0824	101.299	45.1267
ASAH1	Q13510	ASAH1_HUMAN	Acid ceramidase OS=Homo sapiens OX=9606 GN=ASAH1 PE=1 SV=5	7.53	45115.9	1361.01	7	27.34	212.977	175.066	174.99	162.722	197.601	152.55	78.2272	64.6361	110.9	105.032	216.383	212.561	223.899	242.552	170.366	171.69	87.58	88.7775	145.054	148.349	143.47	170.721
ACO2	Q99798	ACON_HUMAN	Aconitate hydratase_ mitochondrial OS=Homo sapiens OX=9606 GN=ACO2 PE=1 SV=2	7.35	86166.9	2277.66	33	58.72	764.704	785.613	735.404	672.099	840.298	698.274	740.781	729.581	701.239	594.084	588.905	576.644	560.906	584.477	454.957	411.679	534.267	627.417	507.763	442.642	726.208	528.966
ACTR3	P61158	ARP3_HUMAN	Actin-related protein 3 OS=Homo sapiens OX=9606 GN=ACTR3 PE=1 SV=3	5.53	47827.5	507.48	6	21.05	153.917	162.423	156.634	147.085	201.545	156.532	163.366	150.599	129.598	101.841	122.089	126.3	136.303	111.258	78.4723	93.7203	146.052	135.791	112.106	101.339	152.354	116.343
AK1	P00568	KAD1_HUMAN	Adenylate kinase isoenzyme 1 OS=Homo sapiens OX=9606 GN=AK1 PE=1 SV=3	9.04	21748.9	3392.65	6	42.27	64.9743	60.1562	137.474	133.145	182.841	119.871	54.6322	52.6882	55.9645	46.6731	21.7811	21.9927	27.7259	22.6838	18.3468	21.6011	28.0819	21.7905	17.9185	15.2459	90.842	21.7168
CAP1	Q01518	CAP1_HUMAN	Adenylyl cyclase-associated protein 1 OS=Homo sapiens OX=9606 GN=CAP1 PE=1 SV=5	8.07	52357.8	958.963	10	30.53	301.821	273.26	308.153	292.206	361.897	295.658	295.968	281.397	239.661	207.134	159.798	153.771	174.952	129.793	137.215	120.215	140.766	152.353	158.383	109.854	285.716	143.71
SLC25A4	P12235	ADT1_HUMAN	ADP/ATP translocase 1 OS=Homo sapiens OX=9606 GN=SLC25A4 PE=1 SV=4	10.25	33292.7	2800.83	15	53.69	110.372	98.8031	94.7315	83.5293	121.726	92.7309	100.725	103.094	109.545	87.6232	201.683	227.016	154.543	241.941	259.439	299.008	220.755	235.459	276.745	380.15	100.288	249.674
SLC25A5	P05141	ADT2_HUMAN	ADP/ATP translocase 2 OS=Homo sapiens OX=9606 GN=SLC25A5 PE=1 SV=7	10.16	33080.4	1581.9	14	43.96	106.751	108.932	84.3827	78.3749	116.275	92.4325	104.242	104.927	101.165	80.9477	123.765	113.875	107.234	106.535	100.455	91.177	120.801	112.605	108.043	95.5115	97.843	108
SLC25A6	P12236	ADT3_HUMAN	ADP/ATP translocase 3 OS=Homo sapiens OX=9606 GN=SLC25A6 PE=1 SV=4	10.24	33094.4	2649.98	15	56.04	292.798	194.259	148.908	145.816	226.425	172.814	210.416	220.107	174.778	156.021	706.483	569.403	634.935	657.054	767.577	760.573	609.938	646.475	888.653	937.167	194.234	717.826
SLC25A31	Q9H0C2	ADT4_HUMAN	ADP/ATP translocase 4 OS=Homo sapiens OX=9606 GN=SLC25A31 PE=2 SV=1	10.45	35307.1	647.625	4	14.92	57.1938	54.2375	48.5684	46.3572	64.6145	52.7633	58.4435	57.351	53.0388	42.2304	38.6854	33.8087	37.2212	35.8392	32.978	27.7566	33.5444	32.2421	28.5301	24.867	53.4798	32.5473
ARF4	P18085	ARF4_HUMAN	ADP-ribosylation factor 4 OS=Homo sapiens OX=9606 GN=ARF4 PE=1 SV=3	7.05	20624.9	1968.4	11	67.78	47.0945	43.4062	42.7331	42.1648	55.879	41.1899	41.3574	40.5464	37.849	35.2159	68.2372	58.3125	66.3773	69.1532	64.0521	60.133	64.1717	58.7057	64.0298	71.8198	42.7436	64.4992
ARF5	P84085	ARF5_HUMAN	ADP-ribosylation factor 5 OS=Homo sapiens OX=9606 GN=ARF5 PE=1 SV=2	6.39	20643.8	1985.3	10	63.89	28.7768	26.6557	21.0542	20.5148	33.6878	24.6621	23.8878	24.5135	21.9846	20.3327	20.138	19.1278	16.1692	18.3666	16.1259	13.9147	19.8685	20.7962	11.9119	17.8518	24.607	17.4271
ARL8B	Q9NVJ2	ARL8B_HUMAN	ADP-ribosylation factor-like protein 8B OS=Homo sapiens OX=9606 GN=ARL8B PE=1 SV=1	8.6	21767.2	1074.55	6	41.94	73.5233	68.5757	60.6237	60.9179	71.3996	61.1878	64.1685	47.1894	47.8376	44.1873	70.1036	68.2589	84.54	77.6573	66.0518	64.3372	67.4867	72.0893	52.1141	43.9533	59.9611	66.6592
AKR7A2	O43488	ARK72_HUMAN	Aflatoxin B1 aldehyde reductase member 2 OS=Homo sapiens OX=9606 GN=AKR7A2 PE=1 SV=3	6.78	40045.3	1262.4	4	18.66	105.199	103.674	154.734	141.191	196.088	138.905	130.72	121.014	92.8282	80.5218	65.116	54.0925	37.2202	52.3691	38.5207	37.1478		52.4332	52.1601	41.7629	126.488	47.8691
ADH5	P11766	ADHX_HUMAN	Alcohol dehydrogenase class-3 OS=Homo sapiens OX=9606 GN=ADH5 PE=1 SV=4	7.33	40579.7	991.082	7	34.76	117.326	95.8705	171.355	165.033	212.711	178.405	110.954	115.893	87.7457	65.1516		24.8455						27.607			132.044	26.2263
ALDH2	P05091	ALDH2_HUMAN	Aldehyde dehydrogenase_ mitochondrial OS=Homo sapiens OX=9606 GN=ALDH2 PE=1 SV=2	6.7	56894.6	1147.75	16	45.65	227.034	204.304	260.383	233.235	269.873	221.996	270.557	258.692	225.258	174.753	70.0342	48.195	82.3664	70.1192		62.9268	62.5491	66.357	58.117	57.5971	234.608	64.2513
AKR1A1	P14550	AK1A1_HUMAN	Aldo-keto reductase family 1 member A1 OS=Homo sapiens OX=9606 GN=AKR1A1 PE=1 SV=3	6.37	36915.3	974.676	10	43.69	92.8279	71.0668	70.2265	53.0493	125.113	94.7185	86.145	77.2931	70.1004	58.7608	30.9113	21.3601	24.2607	25.4283	24.1054	20.9835	29.9536	27.1551		31.0175	79.9301	26.1306
AKR1B1	P15121	ALDR_HUMAN	Aldo-keto reductase family 1 member B1 OS=Homo sapiens OX=9606 GN=AKR1B1 PE=1 SV=3	6.59	36252.6	1048.64	7	32.59	213.066	203.403	216.907	193.371	265.024	209.69	210.104	201.422	130.993	123.581	37.6221	60.376	32.0843	39.9492	32.924		41.821	64.6503		35.6892	196.756	43.1395
ACTN4	O43707	ACTN4_HUMAN	Alpha-actinin-4 OS=Homo sapiens OX=9606 GN=ACTN4 PE=1 SV=2	5.13	105310	482.236	14	22.39	392.094	375.485	370.057	311.71	425.797	311.942	315.397	328.987	295.351	256.434	275.545	223.623	286.865	278.586	168.597	158.403	247.983	209.406	223.692	202.005	338.325	227.471
ADD1	P35611	ADDA_HUMAN	Alpha-adducin OS=Homo sapiens OX=9606 GN=ADD1 PE=1 SV=2	5.5	81354.5	630.78	14	34.74	277.215	292.095	311.226	330.683	662.598	359.849	280.773	308.835	231.331	528.373	168.985	506.627	193.107	222.015	102.966	107.769	202.269	297.953	124.113	144.385	358.298	207.019
ALDH7A1	P49419	AL7A1_HUMAN	Alpha-aminoadipic semialdehyde dehydrogenase OS=Homo sapiens OX=9606 GN=ALDH7A1 PE=1 SV=5	7.94	59057.5	4721.35	26	66.98	333.901	324.202	729.553	686.106	938.142	725.278	512.961	491.123	323.556	273.068	398.265	345.866	532.69	582.511	725.513	742.717	745.407	843.545	573.145	521.79	533.789	601.145
ACTR1A	P61163	ACTZ_HUMAN	Alpha-centractin OS=Homo sapiens OX=9606 GN=ACTR1A PE=1 SV=1	6.22	42727.9	1086.92	10	34.84	289.843	276.607	249.041	223.723	281.233	219.567	264.471	248.4	241.446	200.625	294.42	276.839	198.614	201.255	140.825	136.874	190.095	202.292	178.586	162.394	249.496	198.219
CRYAB	P02511	CRYAB_HUMAN	Alpha-crystallin B chain OS=Homo sapiens OX=9606 GN=CRYAB PE=1 SV=2	6.96	20158.9	24855.5	10	69.71	1681.41	1884.34	2181.2	2171.38	1972.06	1840.99	2797.07	2953.21	1277.81	1132.95	2175.94	2043.19	2241.78	2957.89	1836.13	1709.22	2499.98	2823.8	1424.98	1469.24	1989.24	2118.22
ENO1	P06733	ENOA_HUMAN	Alpha-enolase OS=Homo sapiens OX=9606 GN=ENO1 PE=1 SV=2	7.19	47511.2	27807.3	28	82.03	2553.96	2431.71	4139.76	3734.61	4379.53	4102.4	3022.26	2926.22	2410.37	2127.23	1660.9	1513.33	1580.21	1364.69	2847.83	2541.2	2353.03	2140.41	1886.64	1675.88	3182.81	1956.41
INA	Q16352	AINX_HUMAN	Alpha-internexin OS=Homo sapiens OX=9606 GN=INA PE=1 SV=2	5.17	55561.8	12576	31	75.15	1972.28	1865.01	1320.99	1163.86	1640.55	1404.89	1493.51	1426.79	1833.38	1444.35	2094.16	1897.82	1920.58	1642.03	942.245	989.141	2172.52	2035.58	854.04	739.301	1556.56	1528.74
NAPA	P54920	SNAA_HUMAN	Alpha-soluble NSF attachment protein OS=Homo sapiens OX=9606 GN=NAPA PE=1 SV=3	5.07	33689	693.808	15	75.25	86.0362	98.9701	60.2183	73.1206	83.5151	82.1123	72.6205	76.1344	64.4333	50.4773	84.6854	83.3642	83.5631	79.1716	79.1222	71.1016	79.5625	68.8521	92.1536	73.9679	74.7638	79.5544
MAOB	P27338	AOFB_HUMAN	Amine oxidase [flavin-containing] B OS=Homo sapiens OX=9606 GN=MAOB PE=1 SV=3	7.27	59276.3	990.214	14	45	206.073	197.475	399.251	335.143	349.938	299.184	251.172	254.121	186.629	148.93	185.153	170.923	288.841	289.931	143.055	146.048	227.787	221.496	103.326	90.7797	262.792	186.734
AMPH	P49418	AMPH_HUMAN	Amphiphysin OS=Homo sapiens OX=9606 GN=AMPH PE=1 SV=1	4.37	76428	372.787	4	11.8	87.2828	82.4341	73.352	86.4974	144.191	86.9619	101.158	85.5197	120.846	104.491	158.264	147.037	160.626	174.178	159.618	137.147	177.793	169.827		110.988	97.2735	155.053
ANLN	Q9NQW6	ANLN_HUMAN	Anillin OS=Homo sapiens OX=9606 GN=ANLN PE=1 SV=2	8.01	125568	999.416	17	20.73	418.446	420.764	409.153	355.118	541.807	354.796	415.873	320.999	358.32	303.765	713.972	757.89	781.882	882.519	961.62	972.733	603.869	594.593	952.606	925.195	389.904	814.688
ANXA1	P04083	ANXA1_HUMAN	Annexin A1 OS=Homo sapiens OX=9606 GN=ANXA1 PE=1 SV=2	6.67	38942.4	1610.87	10	51.45	44.9982	45.2715	155.571	144.079	202.923	169.597	68.1194	64.8112	26.4172	22.6869	24.1129	21.8241	90.9624	55.0182	126.651	120.261	38.3632	42.8083			94.4474	65.0002
ANXA2	P07355	ANXA2_HUMAN	Annexin A2 OS=Homo sapiens OX=9606 GN=ANXA2 PE=1 SV=2	7.8	38832.2	1563.07	14	49.85	88.1457	81.6861	379.124	175.142	313.6	235.401	87.9611	92.0049	57.5745	78.3037	55.9469	59.6311	120.952	80.9364	88.3202	87.1808	44.5549	58.2507	90.1932	50.3373	158.894	73.6304
ANXA5	P08758	ANXA5_HUMAN	Annexin A5 OS=Homo sapiens OX=9606 GN=ANXA5 PE=1 SV=2	4.73	35993.9	6898.67	16	65	269.185	258.255	438.191	357.149	438.792	381.68	283.895	281.443	230.125	196.056	72.19	67.2767	88.3254	76.1341	73.8574	80.9712	82.5153	84.8256	91.4118	91.6764	313.477	80.9184
ANXA6	P08133	ANXA6_HUMAN	Annexin A6 OS=Homo sapiens OX=9606 GN=ANXA6 PE=1 SV=3	5.27	76215.6	5635.9	43	77.27	1443.68	1350.32	917.672	843.999	1254.45	1066.68	1053.37	1008.58	1075.77	919.61	872.543	829.689	173.408	168.827	501.134	486.794	483.698	484.907	701.737	602.617	1093.41	530.535
AP2A1	O95782	AP2A1_HUMAN	AP-2 complex subunit alpha-1 OS=Homo sapiens OX=9606 GN=AP2A1 PE=1 SV=3	6.66	108630	496.647	9	16.27	363.114	365.373	320.62	300.574	409.298	321.689	314.867	350.37	353.472	296.672	314.457	315.067	253.359	298.336	311.413	314.29	323.402	321.985	268.726	300.223	339.605	302.126
AP2B1	P63010	AP2B1_HUMAN	AP-2 complex subunit beta OS=Homo sapiens OX=9606 GN=AP2B1 PE=1 SV=1	5.06	105465	706.487	15	24.55	624.421	502.007	402.197	369.783	639.663	399.976	420.591	477.73	522.829	437.329	256.853	241.149	313.089	322.887	262.455	229.768	272.658	266.054	252.001	360.527	479.653	277.744
AP2M1	Q96CW1	AP2M1_HUMAN	AP-2 complex subunit mu OS=Homo sapiens OX=9606 GN=AP2M1 PE=1 SV=2	10.07	49996.9	462.341	3	10.57	108.005	110.073	94.7791	107.01	145.922	115.49	130.32	118.779	113.275	99.1845	369.38	309.979	455.597	531.018	594.076	657.58	337.151	377.744	541.182	585.261	114.284	475.897
APOD	P05090	APOD_HUMAN	Apolipoprotein D OS=Homo sapiens OX=9606 GN=APOD PE=1 SV=1	4.87	21560.7	1569.44	6	34.39	169.293	146.489	151.303	139.102	175.733	144.658	189.457	193.087	113.617	89.2524	84.344	76.7164	105.287	104.617	81.8432	79.5716	93.2394	88.0145	69.8347	58.8007	151.199	84.2269
AQP4	P55087	AQP4_HUMAN	Aquaporin-4 OS=Homo sapiens OX=9606 GN=AQP4 PE=1 SV=2	7.56	35286	1356.36	5	17.34	104.203	87.4729	418.089	393.137	532.391	376.103	225.995	216.483	150.619	121.487	48.8557	63.3468	60.0773	76.9225	66.3022	60.6847	57.6233	57.9264	45.7669	26.8861	262.598	56.4392
GOT1	P17174	AATC_HUMAN	Aspartate aminotransferase_ cytoplasmic OS=Homo sapiens OX=9606 GN=GOT1 PE=1 SV=3	6.6	46475.7	5495.21	18	63.92	664.275	628.708	501.099	445.371	620.533	544.865	549.621	553.132	652.811	488.989	60.6753	69.0815	60.6059	74.044	76.3002	75.7581	66.5204	68.7419	93.9468	92.3708	564.94	73.8045
GOT2	P00505	AATM_HUMAN	Aspartate aminotransferase_ mitochondrial OS=Homo sapiens OX=9606 GN=GOT2 PE=1 SV=3	9.36	47916.9	2940.75	17	52.09	296.341	283.332	243.696	223.431	294.156	230.159	269.042	263.424	276.193	222.375	345.025	314.682	336.808	340.613	331.503	329.564	374.311	367.596	431.854	383.143	260.215	355.51
PEA15	Q15121	PEA15_HUMAN	Astrocytic phosphoprotein PEA-15 OS=Homo sapiens OX=9606 GN=PEA15 PE=1 SV=2	4.74	15097.1	643.259	3	35.38	41.1922	30.6781	36.4404	32.8483	51.0022	45.6044	44.4323	55.4988	60.6833	43.2968	11.6914	11.8844	12.8856	15.4559	10.0372		13.1776	11.9161	18.4116	14.6159	44.1677	13.3418
ATL1	Q8WXF7	ATLA1_HUMAN	Atlastin-1 OS=Homo sapiens OX=9606 GN=ATL1 PE=1 SV=1	5.78	63885.8	765.216	3	14.7	71.0139	66.8626	88.1926	82.518	97.1891	65.2063	68.1592	79.0648	74.2002	63.1765	104.629	90.7459	107.068	131.792	91.2475	97.3106	121.357	126.727	108.549	83.5857	75.5583	106.301
ATP5PB	P24539	AT5F1_HUMAN	ATP synthase F(0) complex subunit B1_ mitochondrial OS=Homo sapiens OX=9606 GN=ATP5PB PE=1 SV=2	9.78	28965.7	1533.21	3	18.36	46.1945	57.6334	45.2741	67.4636	70.2399	61.8725	58.2933	62.5269	45.7929	45.2544	80.8567	74.3971	81.1685	82.4752	61.2257	64.9465	75.2841	81.9994	67.7085	45.2256	56.0546	71.5287
ATP5F1A	P25705	ATPA_HUMAN	ATP synthase subunit alpha_ mitochondrial OS=Homo sapiens OX=9606 GN=ATP5F1A PE=1 SV=1	9.55	59864.8	6834.15	25	61.66	980.401	941.179	917.646	832.655	1102.18	939.758	1031.63	1018.75	904.799	752.228	846.964	836.625	1058.26	995.147	635.249	673.601	1008.92	1018.25	593.367	540.419	942.123	820.68
ATP5F1B	P06576	ATPB_HUMAN	ATP synthase subunit beta_ mitochondrial OS=Homo sapiens OX=9606 GN=ATP5F1B PE=1 SV=3	5.1	56560	7180.3	23	75.61	913.276	856.174	871.729	770.14	1160.83	879.511	996.747	916.915	844.184	712.859	864.981	782.277	977.245	972.544	552.843	582.894	877.981	870.469	451.759	482.749	892.237	741.574
ATP5PD	O75947	ATP5H_HUMAN	ATP synthase subunit d_ mitochondrial OS=Homo sapiens OX=9606 GN=ATP5PD PE=1 SV=3	5.02	18548.3	1929.18	3	43.48	73.8732	72.7627	73.393	54.1515	82.0489	55.3814	65.4423	63.5315	49.4709	49.5166	95.2237	90.3916	59.5387	101.387	58.2491	59.5928	107.569	104.123	106.954	49.8757	63.9572	83.2904
ATP5MF	P56134	ATPK_HUMAN	ATP synthase subunit f_ mitochondrial OS=Homo sapiens OX=9606 GN=ATP5MF PE=1 SV=3	10.07	11031.9	2245.24	2	25.53	29.7622	26.4537	25.2774	23.917	34.4644	21.9332	23.3454	20.5052	16.3169	12.8095	40.8799	38.1844	38.5994	42.9236	21.3242	22.3242	44.1871	43.4268		24.6723	23.4785	35.1691
ATP5F1C	P36542	ATPG_HUMAN	ATP synthase subunit gamma_ mitochondrial OS=Homo sapiens OX=9606 GN=ATP5F1C PE=1 SV=1	9.7	33053.1	748.872	3	12.08	83.7576	79.1218	74.5766	68.6483	99.5323	77.6868	83.9013	82.1404	79.2197	63.9559	81.9181	77.2863	110.513	92.4425	80.7901	70.2079	97.2156	87.2095	66.4607	53.0868	79.254	81.7131
ATP5PO	P48047	ATPO_HUMAN	ATP synthase subunit O_ mitochondrial OS=Homo sapiens OX=9606 GN=ATP5PO PE=1 SV=1	10.6	23391.4	3325.79	11	68.54	104.229	99.5967	89.5289	89.7307	138.1	97.1828	113.021	117.097	94.5394	80.6533	112.338	111.331	134.328	120.1	94.3459	87.5649	129.495	117.271	87.8078	72.0906	102.368	106.667
PFKL	P17858	PFKAL_HUMAN	ATP-dependent 6-phosphofructokinase_ liver type OS=Homo sapiens OX=9606 GN=PFKL PE=1 SV=6	7.25	85817	849.662	13	27.69	267.986	265.252	271.99	284.749	413.967	290.936	269.769	293.344	222.691	202.791	265.465	263.948	221.275	256.79	213.91	185.845	263.768	259.284	231.703	248.333	278.348	241.032
PFKP	Q01813	PFKAP_HUMAN	ATP-dependent 6-phosphofructokinase_ platelet type OS=Homo sapiens OX=9606 GN=PFKP PE=1 SV=2	7.37	86508.7	990.815	25	50.77	471.689	416.172	256.289	245.37	578.625	378.109	432.192	362.319	332.447	339.573	581.109	529.754	251.397	278.381	327.833	342.058	508.338	465.107	306.496	327.502	381.279	391.798
EPB41L1	Q9H4G0	E41L1_HUMAN	Band 4.1-like protein 1 OS=Homo sapiens OX=9606 GN=EPB41L1 PE=1 SV=2	5.3	99073.3	324.008	2	2.95	150.512	138.884	144.766	126.652	192.724	132.793	113.536	108.998	113.322	117.734	228.787	224.403	243.996	241.125	174.838	182.71	238.549	215.858	195.999	178.292	133.992	212.456
EPB41L2	O43491	E41L2_HUMAN	Band 4.1-like protein 2 OS=Homo sapiens OX=9606 GN=EPB41L2 PE=1 SV=1	5.18	113101	1292.92	34	51.54	923.01	863.594	766.676	723.162	1022.32	802.34	772.823	736.296	670.399	557.723	1068.81	995.391	1036.07	1007.35	1158.27	1073.88	851.489	848.477	996.829	936.11	783.834	997.268
EPB41L3	Q9Y2J2	E41L3_HUMAN	Band 4.1-like protein 3 OS=Homo sapiens OX=9606 GN=EPB41L3 PE=1 SV=2	4.92	121533	1208.47	35	54.37	1100.66	1045.54	702.782	646.789	1138.55	834.393	1001.3	941.393	853.559	715.686	1299.19	1116.57	920.218	937.735	700.94	658.622	1133.77	1127.83	601.925	585.165	898.066	908.197
ACTBL2	Q562R1	ACTBL_HUMAN	Beta-actin-like protein 2 OS=Homo sapiens OX=9606 GN=ACTBL2 PE=1 SV=2	5.26	42345.5	6451.91	8	25.53	31.3881	23.8438	71.7665	61.88	102.073	77.3695	35.5443	34.3871	46.0959	35.7666	9.41939	9.71042	18.9279	19.4385	16.7272	16.1675	12.401	11.7229	9.67944	9.144	52.0115	13.3338
ENO3	P13929	ENOB_HUMAN	Beta-enolase OS=Homo sapiens OX=9606 GN=ENO3 PE=1 SV=5	7.67	47329.1	6571.07	11	33.41	74.5572	73.7943	58.8821	54.726	80.9445	65.3349	57.0148	62.3997	64.0765	58.9825	66.3946	63.0074	55.1578	51.1934	78.8623	75.9948	73.8179	68.5908	68.4323	72.687	65.0712	67.4138
NAPB	Q9H115	SNAB_HUMAN	Beta-soluble NSF attachment protein OS=Homo sapiens OX=9606 GN=NAPB PE=1 SV=2	5.18	33899.2	796.306	12	71.81	102.09	99.7106	68.0127	68.6863	99.2228	72.424	79.44	81.2331	83.4673	74.5316	94.9347	84.3896	91.1774	93.4207	103.894	107.933	72.8739	69.6166	101.867	101.035	82.8819	92.1143
SNCB	Q16143	SYUB_HUMAN	Beta-synuclein OS=Homo sapiens OX=9606 GN=SNCB PE=1 SV=1	4.21	14287.9	2187.86	3	56.72	14.0819	23.1966	21.3771	18.3587	17.7021	24.368	16.6309	13.0166	21.8474	22.7109											19.329	0
ATIC	P31939	PUR9_HUMAN	Bifunctional purine biosynthesis protein PURH OS=Homo sapiens OX=9606 GN=ATIC PE=1 SV=3	6.3	65129.2	523.288	3	8.11	95.7675	89.472	112.245	91.0695	138.04	107.295	80.7736	76.0782	96.9043	77.8442	58.355	58.9682	54.9309	53.3775	46.0294	41.4111	59.6194	54.0417	57.0329	73.043	96.5489	55.6809
BASP1	P80723	BASP1_HUMAN	Brain acid soluble protein 1 OS=Homo sapiens OX=9606 GN=BASP1 PE=1 SV=2	4.42	22693.4	4977.78	9	85.02	226.693	226.6	301.981	258.454	381.294	310.721	277.328	278.111	353.472	289.979	57.1147	39.2582	69.6849	65.2702	78.4438	74.5708	75.3006	52.7141	95.5712	80.599	290.463	68.8528
BCAS1	O75363	BCAS1_HUMAN	Breast carcinoma-amplified sequence 1 OS=Homo sapiens OX=9606 GN=BCAS1 PE=1 SV=2	4.8	61994.1	922.914	13	41.1	309.587	324.012	396.511	361.738	398.169	305.959	343.8	344.132	396.189	338.271	220.099	182.448	364.471	339.039	270.088	232.141	297.446	250.719	353.172	266.854	351.837	277.648
BCAN	Q96GW7	PGCB_HUMAN	Brevican core protein OS=Homo sapiens OX=9606 GN=BCAN PE=1 SV=2	4.38	100601	742.508	15	24.59	445.933	441.283	564.153	540.032	733.683	520.963	702.139	693.519	651.975	470.666	148.637	141.942	84.0221	82.0647	58.1775	75.5631	129.895	134.718	154.697	104.889	576.435	111.46
CAMK2A	Q9UQM7	KCC2A_HUMAN	Calcium/calmodulin-dependent protein kinase type II subunit alpha OS=Homo sapiens OX=9606 GN=CAMK2A PE=1 SV=2	6.66	54658.1	5656.14	19	58.79	393.961	383.193	481.133	428.546	601.569	473.562	387.257	377.035	437.55	368.789	690.548	681.974	1185.13	996.951	761.308	721.289	700.095	714.282	732.946	648.911	433.26	783.344
CAMK2B	Q13554	KCC2B_HUMAN	Calcium/calmodulin-dependent protein kinase type II subunit beta OS=Homo sapiens OX=9606 GN=CAMK2B PE=1 SV=3	6.91	73590.3	2181.87	16	51.2	207.212	207.439	184.204	182.141	253.538	200.634	190.362	180.168	184.646	150.433	293.035	266.822	259.282	336.672	211.684	217.622	307.447	290.143	232.21	180.565	194.078	259.548
CAMK2D	Q13557	KCC2D_HUMAN	Calcium/calmodulin-dependent protein kinase type II subunit delta OS=Homo sapiens OX=9606 GN=CAMK2D PE=1 SV=3	6.88	56996.8	1893.06	11	31.66	87.5585	88.3969	116.079	105.417	151.963	114.486	96.9598	93.3627	96.1372	93.6019	104.224	107.305	168.352	162.965	123.542	123.841	130.22	131.51	110.345	101.893	104.396	126.42
CAMK2G	Q13555	KCC2G_HUMAN	Calcium/calmodulin-dependent protein kinase type II subunit gamma OS=Homo sapiens OX=9606 GN=CAMK2G PE=1 SV=4	7.68	63348.6	1968.54	15	41.58	186.62	182.769	181.381	162.826	236.331	195.975	175.776	173.588	146.885	127.73	252.254	235.011	207.033	252.306	169.784	167.655	251.95	239.855	156.414	140.559	176.988	207.282
CAPS	Q13938	CAYP1_HUMAN	Calcyphosin OS=Homo sapiens OX=9606 GN=CAPS PE=1 SV=2	5.62	30525.1	1696.28	4	14.91	38.1368	34.0215	89.61	78.8979	135.818	98.3421	25.3474	26.5598						49.1422				49.7153			65.8417	49.4288
CAPNS1	P04632	CPNS1_HUMAN	Calpain small subunit 1 OS=Homo sapiens OX=9606 GN=CAPNS1 PE=1 SV=1	4.87	28486.9	632.229	2	7.46	108.487	96.3578	85.0522	71.7253	199.629	91.7608	78.9624	70.6974	115.837	81.6296	75.8957	104.379	122.329	104.706	413.663	45.3757	115.047	171.83	171.23	245.213	100.014	156.967
CALR	P27797	CALR_HUMAN	Calreticulin OS=Homo sapiens OX=9606 GN=CALR PE=1 SV=1	4.09	48312.7	1061.14	11	48.92	187.073	197.5	207.026	190.402	215.19	175.584	208.916	211.254	159.063	154.61	114.085	188.399	124.982	220.741	122.518	238.819	126.497	191.639	149.137	223.052	190.662	169.987
CA1	P00915	CAH1_HUMAN	Carbonic anhydrase 1 OS=Homo sapiens OX=9606 GN=CA1 PE=1 SV=2	6.7	28927.3	1813.64	5	31.03	50.6237	46.8475	19.5247	24.5795	187.602	132.085	192.349	183.39	35.8796	25.7166											89.8597	0
CA2	P00918	CAH2_HUMAN	Carbonic anhydrase 2 OS=Homo sapiens OX=9606 GN=CA2 PE=1 SV=2	7.06	29303.1	10230	13	73.85	356.013	349.517	630.486	593.968	599.02	485.292	396.001	382.231	630.219	512.75	367.184	337.683	653.491	619.217	573.918	588.352	444.074	447.611	850.179	708.066	493.55	558.978
CBR1	P16152	CBR1_HUMAN	Carbonyl reductase [NADPH] 1 OS=Homo sapiens OX=9606 GN=CBR1 PE=1 SV=3	8.42	30660.1	23967.3	15	72.56	981.711	934.629	1609.4	1380.2	1307.04	1178.32	1380.25	1344.14	1170.89	917.034	590.2	550.172	614.961	595.259	417.778	433.145	649.846	675.488	540.887	489.905	1220.36	555.764
CBR3	O75828	CBR3_HUMAN	Carbonyl reductase [NADPH] 3 OS=Homo sapiens OX=9606 GN=CBR3 PE=1 SV=3	5.78	31249.5	5929.62	6	44.77	154.46	37.0608	168.429	61.5137	138.603	41.1001	93.9018	123.289	116.317	95.0587	137.597	125.611	203.212	60.4792	174.677	142.094	74.5615	166.665	244.126	162.882	102.973	149.19
CARNS1	A5YM72	CRNS1_HUMAN	Carnosine synthase 1 OS=Homo sapiens OX=9606 GN=CARNS1 PE=1 SV=3	5.81	89967.3	367.572	3	7.74	143.31	132.297	140.393	147.791	143.975	134.677	107.397	101.827	143.475	114.754		134.06	74.7895	79.4904	85.4379			73.8584		60.5753	130.99	84.7019
COMT	P21964	COMT_HUMAN	Catechol O-methyltransferase OS=Homo sapiens OX=9606 GN=COMT PE=1 SV=2	5.13	30493.3	982.391	5	30.63	106.679	83.5043	94.3022	85.1724	120.761	82.8566	89.589	91.1403	66.6063	63.9876	106.12	110.56	113.065	115.176	112.688	101.526	89.0642	107.664	211.231	103.543	88.4599	117.064
CTSD	P07339	CATD_HUMAN	Cathepsin D OS=Homo sapiens OX=9606 GN=CTSD PE=1 SV=1	6.12	45065.5	1476.26	9	27.18	891.784	1287.22	1114.78	1057.05	1114.68	1044.49	1154.59	1153.97	1052.6	933.987	2061.66	1847.08	2494.01	2468.39	2550.42	2420	2044.16	2030.32	2385.29	2578.54	1080.51	2287.99
CD59	P13987	CD59_HUMAN	CD59 glycoprotein OS=Homo sapiens OX=9606 GN=CD59 PE=1 SV=1	6.07	14804.6	1957.05	4	40.63	43.5879	40.1327	46.7224	44.9268	69.9839	57.8664	54.3035	59.0239	49.8492	42.9046	41.7437	36.855	45.2712	45.5043	54.961	52.9744	52.0481	49.6453	62.9025	52.1167	50.9301	49.4022
CD81	P60033	CD81_HUMAN	CD81 antigen OS=Homo sapiens OX=9606 GN=CD81 PE=1 SV=1	4.92	26493.8	12512.4	5	30.93	636.669	624.121	856.148	804.323	916.995	864.86	813.674	864.247	732.071	567.417	746.7	720.444	1267.38	1315.6	1450.94	1372.29	1019.59	1021.09	1288.4	1515.85	768.053	1171.83
CD9	P21926	CD9_HUMAN	CD9 antigen OS=Homo sapiens OX=9606 GN=CD9 PE=1 SV=4	6.92	25986.4	28949.3	9	31.14	1066.9	1418.5	1593.72	2025.15	2021.88	1699.88	1482.95	1419.67	996.697	1083.95	2806.55	2604.86	2723.38	6103.6	3534.19	3039.13	2920.8	3514.43	2228.08	2932.87	1480.93	3240.79
CADM2	Q8N3J6	CADM2_HUMAN	Cell adhesion molecule 2 OS=Homo sapiens OX=9606 GN=CADM2 PE=2 SV=1	5	48010.2	2166.38	10	36.32	173.752	167.856	186.824	170.384	282.843	210.394	172.964	172.247	177.179	148.202	251.551	232.747	291.134	339.393	408.659	370.749	304.879	305.187	303.913	277.425	186.265	308.564
CADM3	Q8N126	CADM3_HUMAN	Cell adhesion molecule 3 OS=Homo sapiens OX=9606 GN=CADM3 PE=1 SV=1	5.68	43756.2	1561.24	10	39.2	145.402	151.224	122.496	120.354	167.128	128.231	114.79	112.201	133.798	93.0781	217.79	183.936	261.69	248.526	244.153	236.875	192.042	184.288	232.615	208.477	128.87	221.039
CADM4	Q8NFZ8	CADM4_HUMAN	Cell adhesion molecule 4 OS=Homo sapiens OX=9606 GN=CADM4 PE=1 SV=1	5.9	43241.6	2100.07	12	43.04	191.374	197.78	177.541	186.35	194.626	175.088	194.435	200.219	201.365	162.537	212.705	203.753	225.391	242.723	252.121	235.393	215.21	192.897	334.081	295.5	188.131	240.978
CEND1	Q8N111	CEND_HUMAN	Cell cycle exit and neuronal differentiation protein 1 OS=Homo sapiens OX=9606 GN=CEND1 PE=1 SV=1	9.98	15011	939.247	3	27.52	69.3994	63.8053	49.8436	48.2224	56.1504	55.4504	67.0693	60.2834	59.0947	42.8885	74.6672	70.1631	70.1845	77.5461	53.5356	59.0949	77.6216	83.2776	52.4262	47.9274	57.2207	66.6444
CDC42	P60953	CDC42_HUMAN	Cell division control protein 42 homolog OS=Homo sapiens OX=9606 GN=CDC42 PE=1 SV=2	6.18	21600.8	7520.25	9	48.17	176.221	143.035	256.149	201.344	266.238	211.52	213.507	184.274	260.424	139.093	145.583	129.892	236.13	260.475	262.02	189.358	180.241	212.512	326.084	205.62	205.18	214.791
CLIC4	Q9Y696	CLIC4_HUMAN	Chloride intracellular channel protein 4 OS=Homo sapiens OX=9606 GN=CLIC4 PE=1 SV=4	5.3	29000.3	2082.96	9	51.78	144.196	137.092	244.829	222.633	270.04	163.188	190.025	174.344	172.152	153.798	77.41	81.4106	145.85	125.978	73.8948	69.5931	94.8862	99.1464	103.052	98.2193	187.23	96.944
SLC44A1	Q8WWI5	CTL1_HUMAN	Choline transporter-like protein 1 OS=Homo sapiens OX=9606 GN=SLC44A1 PE=1 SV=1	8.56	74842	2963.86	14	27.85	462.476	400.701	404.95	368.414	528.48	402.032	468.197	446.412	456.29	338.866	1569.94	1301.26	1489.23	1973.32	3221.02	3579.18	1368.45	1068.48	3980.71	3816.57	427.682	2336.82
CS	O75390	CISY_HUMAN	Citrate synthase_ mitochondrial OS=Homo sapiens OX=9606 GN=CS PE=1 SV=2	8.47	51940.7	632.488	5	17.38	208.659	213.099	157.254	165.861	259.082	152.271	173.815	169.994	166.642	143.576	154.416	128.055	132.199	137.601	77.381	75.878	131.424	138.452	98.6594	88.485	181.025	116.255
CLTC	Q00610	CLH1_HUMAN	Clathrin heavy chain 1 OS=Homo sapiens OX=9606 GN=CLTC PE=1 SV=5	5.36	193383	2105.86	74	63.28	1958.64	1943.41	1732.05	1697.84	2569.93	1813.95	2008.47	2855.63	1701.85	2235.88	2164.19	2295.49	1984.67	2063.21	2513.82	2334.57	1598.36	2164.85	2200.78	2306.2	2051.77	2162.62
CLTCL1	P53675	CLH2_HUMAN	Clathrin heavy chain 2 OS=Homo sapiens OX=9606 GN=CLTCL1 PE=1 SV=2	5.49	189140	672.693	20	18.29	456.233	452.112	452.582	430.509	870.948	435.25	416.774	417.442	350.633	724.154	423.847	574.886	319.215	411.613	227.559	301.099	430.4	654.526	447.635	506.143	500.664	429.692
CLDN11	O75508	CLD11_HUMAN	Claudin-11 OS=Homo sapiens OX=9606 GN=CLDN11 PE=1 SV=2	7.8	22734.6	13745.5	3	14.98	1399.6	1168.36	2467.3	2273.41	1568.91	1426.06	1392.06	1443.93	1903.49	1665.16	2350.43	1894.15	5219.94	5815.36	3551.55	3450.39	2990.83	2714.8	4784.59	4808.96	1670.83	3758.1
COTL1	Q14019	COTL1_HUMAN	Coactosin-like protein OS=Homo sapiens OX=9606 GN=COTL1 PE=1 SV=3	5.35	16059.1	1472.95	5	49.3	46.9264	43.5479	57.0267	57.7251	78.811	58.6706	49.7483	55.1108	30.839	26.8716	16.6016	13.8238		10.7828	15.2642	13.2998	14.362	14.3161	14.1805	12.3354	50.5277	13.8851
CFL1	P23528	COF1_HUMAN	Cofilin-1 OS=Homo sapiens OX=9606 GN=CFL1 PE=1 SV=3	8.23	18730.6	26898	13	69.88	590.244	748.67	615.047	609.777	836.607	723.569	630.38	652.659	622.668	648.075	261.862	241.789	240.963	256.914	240.196	199.191	217.933	255.69	363.366	380.271	667.77	265.817
CFL2	Q9Y281	COF2_HUMAN	Cofilin-2 OS=Homo sapiens OX=9606 GN=CFL2 PE=1 SV=1	8.16	18850.7	7838.88	12	69.88	135.854	119.173	116.561	108.651	133.641	101.114	103.369	101.273	175.351	137.738	89.4103	85.2258	121.11	100.125	82.675	81.0485	85.3765	83.224	229.485	193.936	123.272	115.162
CNTN1	Q12860	CNTN1_HUMAN	Contactin-1 OS=Homo sapiens OX=9606 GN=CNTN1 PE=1 SV=1	5.53	114176	2390.24	37	59.53	739.367	684.537	947.682	853.693	1184.79	944.686	1024.99	1013.32	992.326	808.263	811.465	771.617	1018.34	1023.61	1314.63	1173.48	1107.14	1110.67	1363.03	1207.08	919.366	1090.11
CNTNAP1	P78357	CNTP1_HUMAN	Contactin-associated protein 1 OS=Homo sapiens OX=9606 GN=CNTNAP1 PE=1 SV=1	6.63	158320	1276.46	37	38.37	437.583	438.642	415.204	393.351	634.537	485.036	513.491	498.416	490.796	414.285	687.195	668.114	838.502	880.154	1155.02	1088.13	899.841	874.961	1044.07	1006.01	472.134	914.201
CKB	P12277	KCRB_HUMAN	Creatine kinase B-type OS=Homo sapiens OX=9606 GN=CKB PE=1 SV=1	5.23	42929.5	33226.5	21	82.94	3589.6	3576.56	5017.68	4523.88	4764.11	4205.66	3894.86	3668.57	3057.21	2691.48	3233.82	3050.44	961.981	1261.47	410.444	406.544	2153.04	2278.34	461.684	457.941	3898.96	1467.57
CKMT1A	P12532	KCRU_HUMAN	Creatine kinase U-type_ mitochondrial OS=Homo sapiens OX=9606 GN=CKMT1A PE=1 SV=1	8.37	47436	1585.22	13	50.84	207.591	212.087	192.604	183.927	254.617	200.592	177.848	181.51	195.6	170.065	237.165	246.735	216.117	281.649	164.279	166.501	222.592	241.504	172.638	187.35	197.644	213.653
CSRP1	P21291	CSRP1_HUMAN	Cysteine and glycine-rich protein 1 OS=Homo sapiens OX=9606 GN=CSRP1 PE=1 SV=3	8.56	21422.8	6723.32	9	64.77	244.343	211.623	535.867	497.368	572.757	470.817	318.849	320.593	390.849	308.433	249.719	218.955	534.195	518.64	421.981	409.231	253.443	245.964	402.607	324.428	387.15	357.916
UQCRC1	P31930	QCR1_HUMAN	Cytochrome b-c1 complex subunit 1_ mitochondrial OS=Homo sapiens OX=9606 GN=UQCRC1 PE=1 SV=3	5.95	53330.2	2472.94	13	54.79	216.742	187.092	168.207	158.571	267.848	197.133	220.55	222.475	197.289	171.681	274.143	277.287	265.145	270.137	214.28	235.317	266.502	279.874	198.995	237.974	200.759	251.965
UQCRC2	P22695	QCR2_HUMAN	Cytochrome b-c1 complex subunit 2_ mitochondrial OS=Homo sapiens OX=9606 GN=UQCRC2 PE=1 SV=3	8.93	48614.2	953.896	11	41.28	185.914	176.908	133.391	123.181	199.719	155.093	178.125	167.552	167.12	145.362	201.86	190.113	190.072	201.964	149.239	176.75	202.635	206.787	170.573	136.933	163.236	182.693
UQCRB	P14927	QCR7_HUMAN	Cytochrome b-c1 complex subunit 7 OS=Homo sapiens OX=9606 GN=UQCRB PE=1 SV=2	9.31	13530.5	858.387	2	25.23	47.8007	40.0247	26.241	27.4661	50.4128	31.4519	39.1996	32.3023	50.6216	34.8828	134.115	132.36	132.796	143.573	147.976	165.894	100.795	86.3606	274.035	171.192	38.0403	148.91
CYCS	P99999	CYC_HUMAN	Cytochrome c OS=Homo sapiens OX=9606 GN=CYCS PE=1 SV=2	10.15	11862.8	2601.08	5	44.76	35.3183	37.1898	26.4617	26.9902	37.8731	27.2114	23.583	28.7949	27.9202	27.9867	39.7242	29.7899	27.0816	36.8496	28.256	23.4115	37.0985	35.8196	40.7602	32.2138	29.9329	33.1005
MT-CO2	P00403	COX2_HUMAN	Cytochrome c oxidase subunit 2 OS=Homo sapiens OX=9606 GN=MT-CO2 PE=1 SV=1	4.49	25736.2	1710.44	5	27.75	135	128.496	94.1692	95.67	144.794	108.436	108.283	103.368	109.087	91.3059	169.991	145.826	101.234	146.759	96.1137	94.5301	159.526	152.093	94.4582	95.432	111.861	125.596
COX4I1	P13073	COX41_HUMAN	Cytochrome c oxidase subunit 4 isoform 1_ mitochondrial OS=Homo sapiens OX=9606 GN=COX4I1 PE=1 SV=1	10.11	19633.8	1462.19	6	31.95	82.1017	80.9623	75.0368	60.8744	93.2377	70.3538	72.0873	72.2039	76.0354	59.4769	87.9621	83.184	95.3991	84.4028	63.367	63.1665	84.503	83.1691	64.5266	54.9718	74.237	76.4652
NDUFA4	O00483	NDUA4_HUMAN	Cytochrome c oxidase subunit NDUFA4 OS=Homo sapiens OX=9606 GN=NDUFA4 PE=1 SV=1	9.85	9426.9	2447.08	2	27.16	51.1309	45.5767	35.4744	33.4463	53.1703	45.3671	45.6495	45.959	44.8595	37.3558	53.6956	48.4929	44.9326	49.9003	44.1671	43.695	49.6491	51.1532	36.5339	34.2747	43.799	45.6494
CYC1	P08574	CY1_HUMAN	Cytochrome c1_ heme protein_ mitochondrial OS=Homo sapiens OX=9606 GN=CYC1 PE=1 SV=3	9.23	35764.2	1140.55	4	32	81.2781	86.3164	72.4562	64.4464	104.747	73.6246	74.2218	85.845	75.9961	83.0881	104.052	106.806	110.274	102.996	81.0901	79.999	111.784	100.357	106.04	88.5553	80.2019	99.1953
DYNC1H1	Q14204	DYHC1_HUMAN	Cytoplasmic dynein 1 heavy chain 1 OS=Homo sapiens OX=9606 GN=DYNC1H1 PE=1 SV=5	5.99	535146	952.117	160	51.64	4699.71	5049.89	4004.56	3549.97	6297.53	4609.1	5161.95	4711.81	4472.12	4162.88	4784.74	5307.72	11232.2	7524.02	7548.85	8005.57	5693.56	5998.34	17199.5	6219.18	4671.95	7951.37
DYNC1LI2	O43237	DC1L2_HUMAN	Cytoplasmic dynein 1 light intermediate chain 2 OS=Homo sapiens OX=9606 GN=DYNC1LI2 PE=1 SV=1	5.97	54384.5	1059.3	12	41.46	631.846	603.311	347.34	409.232	610.22	478.349	551.089	566.818	454.584	399.848	880.312	868.927	837.689	801.708	1103.91	991.161	875.079	770.595	1107.46	963.974	505.264	920.081
ACOT7	O00154	BACH_HUMAN	Cytosolic acyl coenzyme A thioester hydrolase OS=Homo sapiens OX=9606 GN=ACOT7 PE=1 SV=3	8.55	42480.4	1053.06	8	40	263.24	233.856	159.779	141.559	225.512	171.778	198.633	183.527	221.988	173.898	59.2659	38.6272	30.3977	27.4329			39.4498	40.2923		45.9752	197.377	40.2058
CNDP2	Q96KP4	CNDP2_HUMAN	Cytosolic non-specific dipeptidase OS=Homo sapiens OX=9606 GN=CNDP2 PE=1 SV=2	5.59	53220.7	2452.93	18	56.63	414.765	399.062	587.808	515.88	628.145	516.268	463.147	456.821	456.576	372.513	225.382	158.538	188.785	170.197	206.88	180.374	171.573	180.054	284.793	193.05	481.099	195.963
PHGDH	O43175	SERA_HUMAN	D-3-phosphoglycerate dehydrogenase OS=Homo sapiens OX=9606 GN=PHGDH PE=1 SV=4	6.31	57392	2603.58	16	40.15	414.822	415.946	889.843	815.797	1054.83	825.351	341.652	322.809	385.299	313.806	249.349	210.168	232.529	231.381	287.11	260.897	124.997	94.7604	191.092	173.707	578.015	205.599
ALDH4A1	P30038	AL4A1_HUMAN	Delta-1-pyrroline-5-carboxylate dehydrogenase_ mitochondrial OS=Homo sapiens OX=9606 GN=ALDH4A1 PE=1 SV=3	8.07	62175.8	714.881	9	27.89	93.9801	94.4931	156.248	124.289	171.123	120.097	149.562	140.2	126.512	119.712	101.928	106.838	177.085	174.49	220.526	233.587	188.772	203.624	176.994	203.875	129.622	178.772
ALAD	P13716	HEM2_HUMAN	Delta-aminolevulinic acid dehydratase OS=Homo sapiens OX=9606 GN=ALAD PE=1 SV=1	6.37	36751.2	1327.88	4	22.42	92.5639	85.3434	116.774	100.344	117.987	85.0081	87.8173	83.9721	73.1071	60.1061	64.6553	64.6681	56.3617	65.6783	40.3445	34.797	37.6708	41.9898	37.2543	45.8095	90.3023	48.9229
DES	P17661	DESM_HUMAN	Desmin OS=Homo sapiens OX=9606 GN=DES PE=1 SV=3	5.03	53592.9	1392.4	9	25.32	430.589	332.906	396.404	372.911	418.506	326.94	339.877	327.403	373.713	392.852	925.511	833.463	1243.49	1336.26	848.411	915	877.729	931.584	1532.84	964.261	371.21	1040.86
DSTN	P60981	DEST_HUMAN	Destrin OS=Homo sapiens OX=9606 GN=DSTN PE=1 SV=3	7.84	18962	1025.26	8	53.94	315.672	312.249	232.904	219.986	276.155	234.12	240.971	259.27	275.47	240.007	413.115	383.645	409.229	415.408	375.666	412.023	397.481	384.381	572.762	446.292	260.68	421
QDPR	P09417	DHPR_HUMAN	Dihydropteridine reductase OS=Homo sapiens OX=9606 GN=QDPR PE=1 SV=2	7.19	26017.7	12182.6	14	77.87	651.803	618.965	790.473	720.363	570.724	483.608	749.402	713.056	560.645	445.214	515.755	490.217	599.668	586.895	347.293	351.135	539.716	578.462	538.065	529.839	630.425	507.705
CRMP1	Q14194	DPYL1_HUMAN	Dihydropyrimidinase-related protein 1 OS=Homo sapiens OX=9606 GN=CRMP1 PE=1 SV=1	6.62	62526.1	5226.24	19	65.21	358.528	368.848	347.198	353.414	551.135	360.857	335.158	324.366	350.447	297.843	485.604	441.021	395.927	411.395	548.993	488.868	434.268	406.533	446.444	486.979	364.779	454.603
DPYSL2	Q16555	DPYL2_HUMAN	Dihydropyrimidinase-related protein 2 OS=Homo sapiens OX=9606 GN=DPYSL2 PE=1 SV=1	5.95	62749.9	33844.5	30	83.04	9648.9	9702.81	11064.5	9949.8	11043.8	10204	11199.8	10659	8649.3	7972.85	4561.89	4132.86	3075.5	2801.5	4057.72	4044.98	4690.59	4845.68	3466.14	3484.83	10009.5	3916.17
DPYSL3	Q14195	DPYL3_HUMAN	Dihydropyrimidinase-related protein 3 OS=Homo sapiens OX=9606 GN=DPYSL3 PE=1 SV=1	6.06	62362.6	4658.47	20	64.91	423.185	416.259	605.259	549.277	784.655	592.572	482.017	464.142	308.047	244.395	152.938	145.967	93.6466	93.1636	211.961	227.95	82.8688	112.435	87.0133	86.8565	486.981	129.48
DPYSL4	O14531	DPYL4_HUMAN	Dihydropyrimidinase-related protein 4 OS=Homo sapiens OX=9606 GN=DPYSL4 PE=1 SV=2	6.69	62505	631.538	11	36.36	150.961	128.736	128.641	125.162	177.923	127.627	128.991	116.147	176.726	110.464	135.915	140.66	107.809	116.089	175.835	153.438	142.919	142.153	163.479	155.058	137.138	143.336
DPYSL5	Q9BPU6	DPYL5_HUMAN	Dihydropyrimidinase-related protein 5 OS=Homo sapiens OX=9606 GN=DPYSL5 PE=1 SV=1	6.79	61991.7	4133.48	25	69.86	542.564	562.644	459.821	422.625	698.252	545.925	516.206	497.456	598.647	548.102	668.644	633.546	471.138	474.256	752.351	778.709	701.322	683.982	770.635	764.199	539.224	669.878
DNAJA1	P31689	DNJA1_HUMAN	DnaJ homolog subfamily A member 1 OS=Homo sapiens OX=9606 GN=DNAJA1 PE=1 SV=2	6.7	45609.6	793.988	7	35.77	106.849	88.8337	73.5104	63.8567	120.065	77.5186	85.209	86.4007	101.292	67.672	259.213	214.641	272.573	237.07	394.196	393.221	219.753	185.431	382.865	307.806	87.1208	286.677
DNAJA2	O60884	DNJA2_HUMAN	DnaJ homolog subfamily A member 2 OS=Homo sapiens OX=9606 GN=DNAJA2 PE=1 SV=1	6.07	46373	703.781	3	12.86	54.3529	57.1028	52.2653	45.6276	70.9016	51.3873	62.586	55.1892	44.3845	40.8076	67.5324	65.2032	75.2138	74.0697	65.894	70.9878	67.6827	59.133	70.0121	56.3125	53.4605	67.2041
DNAJC5	Q9H3Z4	DNJC5_HUMAN	DnaJ homolog subfamily C member 5 OS=Homo sapiens OX=9606 GN=DNAJC5 PE=1 SV=1	4.75	22947.2	1218.35	2	24.75	21.2898	21.8174	27.0449	26.6398	46.5682	28.6588	27.7165	25.764	40.6053	33.192	29.3236	27.6454	59.8324	48.0771	56.4754	54.6978	36.5276	46.6318	63.4242	52.1978	29.9297	47.4833
DCTN1	Q14203	DCTN1_HUMAN	Dynactin subunit 1 OS=Homo sapiens OX=9606 GN=DCTN1 PE=1 SV=3	5.5	142436	428.113	9	13.46	366.907	313.348	283.854	287.717	413.125	310.495	326.551	284.799	275.052	257.217	367.971	372.907	214.74	268.201	180.736	186.224	252.523	262.685	159.711	215.981	311.906	248.168
DCTN2	Q13561	DCTN2_HUMAN	Dynactin subunit 2 OS=Homo sapiens OX=9606 GN=DCTN2 PE=1 SV=4	4.93	44345.1	1201.8	12	52.12	205.418	201.373	187.179	175.273	235.411	169.461	204.079	188.513	206.676	165.418	345.665	311.321	386.582	448.501	435.069	395.047	406.177	347.035	242.171	465.11	193.88	378.268
DNM1	Q05193	DYN1_HUMAN	Dynamin-1 OS=Homo sapiens OX=9606 GN=DNM1 PE=1 SV=2	6.79	97807.7	3241.94	38	57.87	840.8	890.498	630.488	629.87	946.955	759.988	666.359	634.53	707.42	624.901	1007.92	1004.43	762.423	873.102	785.189	958.972	976.795	941.646	1087.81	885.67	733.181	928.396
DNM2	P50570	DYN2_HUMAN	Dynamin-2 OS=Homo sapiens OX=9606 GN=DNM2 PE=1 SV=2	7.15	98406.6	556.754	24	35.75	191.761	190.328	182.128	171.465	220.047	166.377	161.387	148.319	153.998	160.509	186.63	175.595	164.022	192.15	229.339	294.232	250.985	174.978	277.179	278.12	174.632	222.323
DNM3	Q9UQ16	DYN3_HUMAN	Dynamin-3 OS=Homo sapiens OX=9606 GN=DNM3 PE=1 SV=4	8.5	98145.5	1117.26	24	40.16	244.009	235.146	221.744	188.995	258.629	202.559	202.775	193.786	182.338	197.956	273.3	267.908	201.128	273.844	281.953	351.327	326.334	241.954	346.984	354.734	212.793	291.947
DYNLL1	P63167	DYL1_HUMAN	Dynein light chain 1_ cytoplasmic OS=Homo sapiens OX=9606 GN=DYNLL1 PE=1 SV=1	7.24	10537	9314.59	4	57.3	57.2731	52.8978	58.4968	53.2824	65.0574	47.2992	53.7994	48.3358	55.7596	42.9968	55.7442	53.7226	54.8992	64.1149	49.5672	48.1364	59.5062	60.9745	65.6194	61.2533	53.5198	57.3538
DYNLL2	Q96FJ2	DYL2_HUMAN	Dynein light chain 2_ cytoplasmic OS=Homo sapiens OX=9606 GN=DYNLL2 PE=1 SV=1	7.26	10463.9	9808.25	4	57.3	61.6269	57.0612	49.4928	44.0963	52.6552	37.289	48.5948	43.2398	45.9159	35.5821	53.4915	48.0927	37.32	51.2267	37.0517	36.9968	48.1363	48.7678	47.5133	47.3135	47.5554	45.591
EHD1	Q9H4M9	EHD1_HUMAN	EH domain-containing protein 1 OS=Homo sapiens OX=9606 GN=EHD1 PE=1 SV=2	6.39	60684	524.216	5	17.6	56.391	41.4467	37.6862	43.4335	51.4733	30.1667	34.2456	27.7865	48.3504	40.4566	79.1843	79.6973	79.2157	87.6124	105.893	103.383	58.4552	83.9221	89.8933	120.715	41.1436	88.7971
EHD3	Q9NZN3	EHD3_HUMAN	EH domain-containing protein 3 OS=Homo sapiens OX=9606 GN=EHD3 PE=1 SV=2	6.13	60944.3	837.543	12	40.56	539.728	658.269	507.052	410.712	560.235	489.115	509.382	562.781	482.296	424.492	1297.04	1041.22	1375.12	1248.42	1262.08	1083.06	1079.84	909.107	1321.84	1157.45	514.406	1177.52
ETFA	P13804	ETFA_HUMAN	Electron transfer flavoprotein subunit alpha_ mitochondrial OS=Homo sapiens OX=9606 GN=ETFA PE=1 SV=1	8.5	35421.8	719.971	5	24.32	49.159	48.6886	44.8385	43.803	65.1067	142.484	186.475	213.469	109.296	99.5652		39.5618	148.475		96.853	70.7841	24.2414	18.0097	44.4002	76.8621	100.289	64.8984
EEF1A1	P68104	EF1A1_HUMAN	Elongation factor 1-alpha 1 OS=Homo sapiens OX=9606 GN=EEF1A1 PE=1 SV=1	9.49	50483.1	7241.44	18	74.89	860.425	824.419	1351.62	1190.43	1511.66	1299.51	1070.07	993.29	800.049	681.002	884.819	880.032	1161.47	1280.28	1136.51	1133.77	974.455	955.747	870.503	906.621	1058.25	1018.42
EEF1A2	Q05639	EF1A2_HUMAN	Elongation factor 1-alpha 2 OS=Homo sapiens OX=9606 GN=EEF1A2 PE=1 SV=1	9.49	50812.4	3024.49	15	71.27	343.602	335.328	308.531	298.602	416.315	359.468	335.641	321.385	315.322	279.546	397.341	418.194	272.973	283.879	329.195	308.27	312.338	392.985	267.518	334.133	331.374	331.682
TUFM	P49411	EFTU_HUMAN	Elongation factor Tu_ mitochondrial OS=Homo sapiens OX=9606 GN=TUFM PE=1 SV=2	7.39	49883.8	981.362	11	38.94	173.602	162.213	172.508	389.878	711.969	218.84	196.648	183.147	177.314	613.193	168.714	462.001	248.467	203.686	131.041	135.693	258.232	324.018	156.739	230.339	299.931	231.893
ENDOD1	O94919	ENDD1_HUMAN	Endonuclease domain-containing 1 protein OS=Homo sapiens OX=9606 GN=ENDOD1 PE=1 SV=2	5.4	55758	2386.53	13	51.2	838.122	626.791	580.571	478.448	643.639	406.715	576.896	539.276	492.543	432.985	1243.93	1048.06	1216.05	1301.52	1303.16	1223.33	1078.6	1120.25	1144.8	1182.9	561.599	1186.26
SH3GL2	Q99962	SH3G2_HUMAN	Endophilin-A1 OS=Homo sapiens OX=9606 GN=SH3GL2 PE=1 SV=1	5.17	40133.5	868.772	5	18.18	212.252	194.103	126.498	110.721	190.332	147.223	146.093	138.111	161.921	133.069	52.2673	51.4955	31.839	28.1101	28.5904	42.4256	49.8249	49.3114	30.3052	31.1473	156.032	39.5317
HSPA5	P11021	BIP_HUMAN	Endoplasmic reticulum chaperone BiP OS=Homo sapiens OX=9606 GN=HSPA5 PE=1 SV=2	4.88	72447.1	2343.81	16	34.71	201.839	148.874	196.881	174.003	228.379	165.452	209.621	191.523	165.937	129.201	190.724	158.006	268.194	210.04	245.439	216.137	211.381	179.151	275.365	143.306	181.171	209.774
ENOPH1	Q9UHY7	ENOPH_HUMAN	Enolase-phosphatase E1 OS=Homo sapiens OX=9606 GN=ENOPH1 PE=1 SV=1	4.47	29103.8	781.566	6	34.87	94.308	105.072	101.011	104.212	141.478	105.415	92.0612	100.709	81.9045	85.2355	37.1678	33.8185	21.6428	28.1516	25.6063	16.0888	23.1003	30.2594	31.904		101.141	27.5266
ECHS1	P30084	ECHM_HUMAN	Enoyl-CoA hydratase_ mitochondrial OS=Homo sapiens OX=9606 GN=ECHS1 PE=1 SV=4	8.07	31843.7	892.545	7	37.24	89.0388	86.1451	76.5049	77.8418	86.198	71.3195	72.8221	78.348	71.0384	63.2949	35.3369	33.4314	37.6193	36.3065	17.3169	40.4812	38.2987	37.6245			77.2551	34.5519
EPHX1	P07099	HYEP_HUMAN	Epoxide hydrolase 1 OS=Homo sapiens OX=9606 GN=EPHX1 PE=1 SV=1	6.87	53177.1	477.766	2	10.55	108.529	110.075	112.68	110.603	130.393	106.267	117.206	127.805	99.5742	76.5497	84.1997	99.6117	127.355	107.59	84.5603	82.0155	106.608	103.578	92.2676	88.0597	109.968	97.5846
C11orf54	Q9H0W9	CK054_HUMAN	Ester hydrolase C11orf54 OS=Homo sapiens OX=9606 GN=C11orf54 PE=1 SV=1	6.27	35630.7	545.861	3	15.87	39.6398	30.9887	63.2562	59.1469	82.6141	62.7445	56.1897	55.5124	47.8721	39.7969						23.109	36.6403	33.4575	32.0345	26.8861	53.7761	30.4255
EIF4A2	Q14240	IF4A2_HUMAN	Eukaryotic initiation factor 4A-II OS=Homo sapiens OX=9606 GN=EIF4A2 PE=1 SV=2	5.17	46630.5	578.195	5	16.71	120.884	115.221	101.639	101.648	129.679	98.0925	110.335	107.685	81.7841	66.1641	86.9269	62.9754	67.9967	55.5292	53.2223	51.9577	71.217	80.1619	46.4778	49.3798	103.313	62.5845
EIF4H	Q15056	IF4H_HUMAN	Eukaryotic translation initiation factor 4H OS=Homo sapiens OX=9606 GN=EIF4H PE=1 SV=5	7.21	27442.1	765.912	4	28.23	51.3824	53.3208	47.9169	49.2304	80.1482	49.7501	45.3084	47.9843	43.0809	37.4949	34.0461	38.7627	20.978	23.3107			29.3255	27.6375			50.5617	29.0101
SLC1A3	P43003	EAA1_HUMAN	Excitatory amino acid transporter 1 OS=Homo sapiens OX=9606 GN=SLC1A3 PE=1 SV=1	8.69	59743.6	611.52	6	16.97	194.229	191.386	407.405	371.623	407.423	340.788	299.215	297.76	202.015	173.352	66.7898	74.281	85.244	91.9808	100.741	94.2547	101.67	73.8847	74.6404	64.7418	288.52	82.8228
SLC1A2	P43004	EAA2_HUMAN	Excitatory amino acid transporter 2 OS=Homo sapiens OX=9606 GN=SLC1A2 PE=1 SV=2	6.11	62617.7	548.403	5	12.54	101.069	205.367	227.582	214.863	303.779	220.781	107.159	183.562	215.377	191.451	62.7187	73.0011	96.6967	73.1205	71.3503	67.3649	75.9956	93.9304	71.4272	92.6788	197.099	77.8284
EZR	P15311	EZRI_HUMAN	Ezrin OS=Homo sapiens OX=9606 GN=EZR PE=1 SV=4	5.9	69527	1165.68	15	26.45	143.748	138.178	254.267	224.297	383.305	237.091	184.768	186.438	134.424	147.433	125.909	152.421	199.702	178.282	173.061	130.123	157.342	117.32	185.166	109.483	203.395	152.881
CAPZA1	P52907	CAZA1_HUMAN	F-actin-capping protein subunit alpha-1 OS=Homo sapiens OX=9606 GN=CAPZA1 PE=1 SV=3	5.34	33093.9	728.836	3	15.38	74.0945	67.1905	70.3716	69.7719	91.1245	65.1918	70.3701	67.035	62.3574	49.223	70.1927	37.8263	38.84	39.4028	49.2285	42.7506	55.8246	36.4233			68.673	46.3111
FSCN1	Q16658	FSCN1_HUMAN	Fascin OS=Homo sapiens OX=9606 GN=FSCN1 PE=1 SV=3	6.9	55157.3	2302.24	22	56.59	487.683	491.659	464.676	426.328	584.141	464.776	443.593	441.832	583.748	510.254	411.312	425.982	337.133	310.828	427.883	426.924	339.774	358.759	575.376	581.611	489.869	419.558
FABP5	Q01469	FABP5_HUMAN	Fatty acid-binding protein 5 OS=Homo sapiens OX=9606 GN=FABP5 PE=1 SV=3	6.82	15506.6	4446.1	8	71.85	77.1801	69.8431	172.026	170.691	174.322	147.069	85.9633	90.3479	52.8201	51.2498	9.1285	14.6903	13.8573	15.5444	11.5629	9.31784	24.7145	26.4978	20.1054	19.0589	109.151	16.4478
FABP3	P05413	FABPH_HUMAN	Fatty acid-binding protein_ heart OS=Homo sapiens OX=9606 GN=FABP3 PE=1 SV=4	6.39	14915.1	1637.06	4	33.83	17.7249	16.3666	18.4363	15.6782	21.3082	13.8916	8.02741	10.1645	16.2992	10.4786	14.8618	14.689	14.2297	12.6649	15.0644	14.3112	16.2255	13.9503	22.1786	16.3952	14.8376	15.4571
FBXO2	Q9UK22	FBX2_HUMAN	F-box only protein 2 OS=Homo sapiens OX=9606 GN=FBXO2 PE=1 SV=2	4.1	33726.9	3214.79	12	61.82	233.371	210.715	270.223	232.593	347.323	272.405	199.522	196.255	183.434	144.621	88.3318	82.746	43.5451	47.1834	39.156	38.1206	84.9272	80.5371	45.0745	41.1708	229.046	59.0793
FTH1	P02794	FRIH_HUMAN	Ferritin heavy chain OS=Homo sapiens OX=9606 GN=FTH1 PE=1 SV=2	5.2	21396.8	1603.45	10	71.04	148.157	188.62	136.604	180.778	204.68	183.922	169.878	177.98	150.434	139.379	63.9809	61.1384	61.3789	66.9382	63.9196	71.1454	63.3432	59.0607	87.7037	86.9592	168.043	68.5568
FGB	P02675	FIBB_HUMAN	Fibrinogen beta chain OS=Homo sapiens OX=9606 GN=FGB PE=1 SV=2	8.26	56612.6	1362.17	8	30.35	152.948		113.508	104.749	105.777	70.237	283.05	270.158				27.2904	94.886	110.967	33.925	432.347	173.45	82.8357			157.204	136.529
FGG	P02679	FIBG_HUMAN	Fibrinogen gamma chain OS=Homo sapiens OX=9606 GN=FGG PE=1 SV=3	5.25	52139	1618.56	8	27.37	63.247	50.2549	136.842	122.338	115.509	77.4973	373.208	374.831	44.1289	36.6247	37.8261	47.6574	95.9949	89.993	64.9597	74.8892	115.9	121.809	59.6895	50.9548	139.448	75.9673
FGF1	P05230	FGF1_HUMAN	Fibroblast growth factor 1 OS=Homo sapiens OX=9606 GN=FGF1 PE=1 SV=1	6.64	17630.8	980.492	5	55.48	24.6632	23.5941	37.3894	37.8837	47.2051	35.9443	32.1685	32.8681	20.0296	21.1883					13.7139	13.5653				12.2081	31.2934	13.1624
BLVRB	P30043	BLVRB_HUMAN	Flavin reductase (NADPH) OS=Homo sapiens OX=9606 GN=BLVRB PE=1 SV=3	7.51	22233.4	904.117	6	54.37	49.1078	48.0063	57.0329	50.7041	88.2766	58.7374	61.3362	58.1561	42.6803	37.2963	20.5904	20.2212		12.6366	18.7336	14.5113	18.0185	16.7292			55.1334	17.3487
FHL1	Q13642	FHL1_HUMAN	Four and a half LIM domains protein 1 OS=Homo sapiens OX=9606 GN=FHL1 PE=1 SV=4	9.05	38030.9	2230.82	9	37.46	69.2306	75.2957	141.267	135.583	176.019	139.232	96.4444	103.202	73.6587	58.9966	94.2295	88.9205	177.257	173.318	239.917	240.916	124.323	125.602	133.899	117.653	106.893	151.603
ALDOA	P04075	ALDOA_HUMAN	Fructose-bisphosphate aldolase A OS=Homo sapiens OX=9606 GN=ALDOA PE=1 SV=2	8.07	39876.3	18319.8	25	91.76	1678.84	1596.07	1689.92	1483.91	1918.96	1679.2	1784.95	1695.45	1625.26	1221.79	458.405	460.394	414.363	412.186	312.909	324.096	458.843	483.136	489.465	477.081	1637.44	429.088
ALDOB	P05062	ALDOB_HUMAN	Fructose-bisphosphate aldolase B OS=Homo sapiens OX=9606 GN=ALDOB PE=1 SV=2	7.8	39986.3	784.218	4	14.56	139.368	113.747	125.65	110.803	183.468	110.079	112.287	121.803	79.6085	61.1446	102.161	99.1173	90.6959	82.4937	144.103	154.551	117.33	130.425	107.49	100.697	115.796	112.906
ALDOC	P09972	ALDOC_HUMAN	Fructose-bisphosphate aldolase C OS=Homo sapiens OX=9606 GN=ALDOC PE=1 SV=2	6.47	39855.1	14652.7	23	79.95	1342.57	1227.72	1171.68	996.054	1387	1191.14	1405.49	1379.27	1197.02	940.093	164.368	191.466	143.425	163.34	176.705	256.294	170.711	189.405	266.86	310.318	1223.8	203.289
LGALS1	P09382	LEG1_HUMAN	Galectin-1 OS=Homo sapiens OX=9606 GN=LGALS1 PE=1 SV=2	5.15	15057.9	5830.01	7	77.78	345.126	463.784	202.638	329.332	331.683	369.738	282.123	371.094	290	399.363	115.16	148.111	72.2143	190.964	81.2871	113.904	98.2506	159.257	168.121	136.198	338.488	128.347
ADD3	Q9UEY8	ADDG_HUMAN	Gamma-adducin OS=Homo sapiens OX=9606 GN=ADD3 PE=1 SV=1	5.9	79496.9	517.504	5	14.02	153.52	135.177	195.745	176.354	255.784	181.729	157.338	163.402	110.01	113.631	77.8549	90.8493	89.6554	98.7496	68.6764	117.365	76.4862	91.3329	56.7486	50.9919	164.269	81.871
ENO2	P09104	ENOG_HUMAN	Gamma-enolase OS=Homo sapiens OX=9606 GN=ENO2 PE=1 SV=3	4.72	47610.8	21093	20	68.89	1273.84	1211.42	1271.44	1090.99	1499.82	1330.59	1252.79	1229.94	1180.2	1020.6	140.007	144.433	131.156	130.046	164.835	165.876	163.168	165.905	175.618	169.533	1236.16	155.058
NAPG	Q99747	SNAG_HUMAN	Gamma-soluble NSF attachment protein OS=Homo sapiens OX=9606 GN=NAPG PE=1 SV=1	5.13	35088.5	619.664	5	31.41	56.4698	56.6345	41.3965	42.7442	64.0918	40.1932	51.8271	47.7101	49.6353	34.9477	61.5716	56.743	60.464	55.5419	54.5269	49.0866	55.3986	61.8058	73.4463	51.3418	48.565	57.9926
SNCG	O76070	SYUG_HUMAN	Gamma-synuclein OS=Homo sapiens OX=9606 GN=SNCG PE=1 SV=2	4.66	13330.8	1918.85	8	73.23	46.8366	49.8682	29.2311	28.5392	24.2187	43.7587	30.3138	31.3256	40.5015	37.2718											36.1865	0
GJA1	P17302	CXA1_HUMAN	Gap junction alpha-1 protein OS=Homo sapiens OX=9606 GN=GJA1 PE=1 SV=2	8.93	43521.7	1022.31	5	23.56	149.801	148.263	340.9	281.256	385.546	275.256	221.421	224.796	123.58	107.954	64.2509	73.9634	82.8072	106.21	66.4101	61.0867	100.032	66.8604	49.2256	24.9859	225.877	69.5833
GSN	P06396	GELS_HUMAN	Gelsolin OS=Homo sapiens OX=9606 GN=GSN PE=1 SV=1	5.87	86096.8	5947.48	29	56.52	2289.5	2136.92	2473.23	2168.73	2580.72	2112.91	2061.82	2047.95	2064.51	1492.14	901.698	837.769	997.881	1053.08	690.619	750.3	823.123	796.888	1132.23	986.771	2142.84	897.035
GFAP	P14136	GFAP_HUMAN	Glial fibrillary acidic protein OS=Homo sapiens OX=9606 GN=GFAP PE=1 SV=1	5.26	49937.3	64812.5	38	82.41	16343	16451.5	81261.9	77205.8	69063.7	83514.1	22692.2	21263.5	6292.92	5275.03	9094.13	7648.21	13818.1	13321.6	19808.2	19934.1	1567.69	1670.64	629.202	698.654	39936.4	8819.06
GNPDA1	P46926	GNPI1_HUMAN	Glucosamine-6-phosphate isomerase 1 OS=Homo sapiens OX=9606 GN=GNPDA1 PE=1 SV=1	6.49	32839.7	422.68	2	16.96	26.0669	28.2207	39.2692		52.7446	36.0383	50.8785	53.8769													41.0136	0
GPI	P06744	G6PI_HUMAN	Glucose-6-phosphate isomerase OS=Homo sapiens OX=9606 GN=GPI PE=1 SV=4	8.49	63375.4	5143.18	22	55.91	980.965	937.218	881.814	857.881	1116.42	948.568	989.108	1004.16	1018.22	779.929	1105.97	1129.41	880.562	879.436	1316.09	1288.58	1293.44	1251.27	1912.39	1658.13	951.428	1271.53
GLUD1	P00367	DHE3_HUMAN	Glutamate dehydrogenase 1_ mitochondrial OS=Homo sapiens OX=9606 GN=GLUD1 PE=1 SV=2	7.72	61740.1	2593	16	45.88	533.34	512.524	685.989	624.082	676.177	511.505	608.394	558.595	545.654	463.132	393.176	383.308	361.532	340.926	165.34	163.665	309.895	312.3	219.214	182.202	571.939	283.156
GLUL	P15104	GLNA_HUMAN	Glutamine synthetase OS=Homo sapiens OX=9606 GN=GLUL PE=1 SV=4	6.48	42691.8	1094.45	8	60.59	122.259	121.006	125.601	112.657	125.915	99.3022	118.566	128.424	107.511	84.289	141.626	142.155	111.59	99.6375	53.0509	92.3424	103.914	134.917	130.533	107.54	114.553	111.731
LANCL1	O43813	LANC1_HUMAN	Glutathione S-transferase LANCL1 OS=Homo sapiens OX=9606 GN=LANCL1 PE=1 SV=1	7.63	46024.5	1776.32	12	45.61	378.498	361.856	413.869	383.273	455.181	380.732	331.738	338.703	397.449	363.525	362.414	342.868	498.676	500.891	504.122	480.642	361.048	349.716	523.308	536.499	380.482	446.018
GSTM2	P28161	GSTM2_HUMAN	Glutathione S-transferase Mu 2 OS=Homo sapiens OX=9606 GN=GSTM2 PE=1 SV=2	5.98	25915.8	2042.64	10	52.29	28.2776	28.9574	54.5697	51.5522	70.7266	53.6826	32.4778	35.3867	25.2496	23.158											40.4038	0
GSTM3	P21266	GSTM3_HUMAN	Glutathione S-transferase Mu 3 OS=Homo sapiens OX=9606 GN=GSTM3 PE=1 SV=3	5.22	27015.9	1541.71	8	34.67	70.5813	54.0244	86.0926	82.5683	161.569	124.803	63.1998	43.6459	72.0263	47.4381	25.7808	28.8262	43.5196	22.8668	28.2625	26.3603	40.9953	39.9807	22.7781	24.4326	80.5949	30.3803
GSTM4	Q03013	GSTM4_HUMAN	Glutathione S-transferase Mu 4 OS=Homo sapiens OX=9606 GN=GSTM4 PE=1 SV=3	5.52	25789.5	2103.33	7	41.28	90.2754	51.203	178.197	161.349	76.8961	51.9203	51.9651	47.5738	69.7211	59.2144	511.298	378.705	385.835	188.326	252.901	224.756	441.872	407.204	219.593	103.219	83.8315	311.371
GSTO1	P78417	GSTO1_HUMAN	Glutathione S-transferase omega-1 OS=Homo sapiens OX=9606 GN=GSTO1 PE=1 SV=2	6.25	27851	681.691	6	29.05	109.911	115.234	127.069	123.306	131.2	107.021	113.355	93.7468	98.1398	72.6911	18.7948	18.0994	20.8725	24.1054	27.4979	22.6193	20.6477	18.6537	37.2664	29.6189	109.167	23.8176
GSTP1	P09211	GSTP1_HUMAN	Glutathione S-transferase P OS=Homo sapiens OX=9606 GN=GSTP1 PE=1 SV=2	5.29	23584	8552.42	12	69.52	314.775	311.473	472.727	408.94	547.828	431.231	420.226	389.163	296.678	243.683	28.9302	53.4618	98.8933	60.4479	38.5703	48.0783	48.7421	45.3557	65.2221	58.6543	383.672	54.6356
GAPDH	P04406	G3P_HUMAN	Glyceraldehyde-3-phosphate dehydrogenase OS=Homo sapiens OX=9606 GN=GAPDH PE=1 SV=3	8.73	36224.4	42902.4	16	69.85	13177.7	12392	13359.3	12553.2	12351.3	12618.9	12932	11880.9	11340.6	8672.05	7379.42	6541.44	4935.73	5044.9	2153.54	2194.28	3524.37	3626.75	2538.76	2404.67	12127.8	4034.39
GAPDHS	O14556	G3PT_HUMAN	Glyceraldehyde-3-phosphate dehydrogenase_ testis-specific OS=Homo sapiens OX=9606 GN=GAPDHS PE=1 SV=2	8.24	44843.4	414.229	2	5.15	2.95322	3.26745	3.33808	12.7468	4.79416	3.69314	12.859	13.335	3.2811	10.5193	57.5044	53.9018	35.3428		66.545	122.234	29.4027	49.3065	128.395	66.5612	7.07872	67.6882
GPD1	P21695	GPDA_HUMAN	Glycerol-3-phosphate dehydrogenase [NAD(+)]_ cytoplasmic OS=Homo sapiens OX=9606 GN=GPD1 PE=1 SV=4	5.78	38195	1033.03	7	42.12	118.528	117.146	85.4083	78.6672	149.252	105.118	82.7579	78.8717	94.8977	78.43	21.5098	27.3007	26.3155	24.9973	33.4811	36.2687	32.2603	34.3019	39.0156	49.1562	98.9076	32.4607
ENPP6	Q6UWR7	ENPP6_HUMAN	Glycerophosphocholine cholinephosphodiesterase ENPP6 OS=Homo sapiens OX=9606 GN=ENPP6 PE=1 SV=2	7.98	50583.3	5628.11	14	48.86	624.314	595.088	480.702	405.549	442.266	413.891	447.964	456.938	535.417	447.284	601.712	572.676	614.033	445.796	498.855	441.195	473.803	464.862	672.476	523.902	484.941	530.931
PYGB	P11216	PYGB_HUMAN	Glycogen phosphorylase_ brain form OS=Homo sapiens OX=9606 GN=PYGB PE=1 SV=5	6.43	97380.5	834.793	30	46.38	740.924	650.514	1023.33	910.237	1315.41	983.205	679.836	649.991	462.543	390.866	522.254	459.985	441.132	533.665	751.554	751.133	318.142	309.386	284.711	286.166	780.686	465.813
GRHPR	Q9UBQ7	GRHPR_HUMAN	Glyoxylate reductase/hydroxypyruvate reductase OS=Homo sapiens OX=9606 GN=GRHPR PE=1 SV=1	7.16	36067.5	1032.95	6	28.96	134.608	131.05	163.083	148.97	179.309	130.166	131.886	131.164	126.791	95.0812	62.1579	43.2855	56.979	41.4214	51.3241	46.5327	47.4591	42.1142	67.616	50.4656	137.211	50.9356
GLIPR2	Q9H4G4	GAPR1_HUMAN	Golgi-associated plant pathogenesis-related protein 1 OS=Homo sapiens OX=9606 GN=GLIPR2 PE=1 SV=3	9.91	17332.4	7445.44	6	64.94	92.7229	88.8884	66.7247	73.5222	115.378	84.7717	75.9387	71.912	116.236	110.886	194.171	140.558	184.156	176.393	233.002	228.411	190.092	156.308	314.4	252.532	89.698	207.002
KRAS	P01116	RASK_HUMAN	GTPase KRas OS=Homo sapiens OX=9606 GN=KRAS PE=1 SV=1	6.4	21941	1164.99	8	58.2	73.3096	56.0188	47.4358	51.4075	70.8235	49.526	59.0825	59.0315	53.4225	40.508	67.5912	60.1415	55.8919	56.4493	59.6293	63.7932	57.0123	64.1281	63.2345	60.9956	56.0566	60.8867
RAN	P62826	RAN_HUMAN	GTP-binding nuclear protein Ran OS=Homo sapiens OX=9606 GN=RAN PE=1 SV=3	7.33	24594.2	944.232	4	23.15	102.341	103.481	92.3603	92.1158	114.954	90.3165	97.5314	95.0537	83.5119	73.4681	49.3986	49.9182	24.4354	26.0141	36.7445	36.3095	50.3899	50.0149	37.962	32.8575	94.5133	39.4045
GDA	Q9Y2T3	GUAD_HUMAN	Guanine deaminase OS=Homo sapiens OX=9606 GN=GDA PE=1 SV=1	5.34	51516.3	476.267	5	19.16	77.3822	73.7773	101.942	100.231	137.425	94.5942	92.4688	84.5578	85.8774	77.9797											92.6235	0
GNAI3	P08754	GNAI3_HUMAN	Guanine nucleotide-binding protein G(i) subunit alpha OS=Homo sapiens OX=9606 GN=GNAI3 PE=1 SV=3	5.37	41102.5	3042.38	10	37.57	28.7823	32.8486	40.215	42.4689	47.7292	37.1256	31.8869	35.1128	29.4179	25.5344	30.792	31.4149	29.3277	28.1664	33.1195	31.3025	25.6048	30.86	29.4089	25.5139	35.1122	29.551
GNAI1	P63096	GNAI1_HUMAN	Guanine nucleotide-binding protein G(i) subunit alpha-1 OS=Homo sapiens OX=9606 GN=GNAI1 PE=1 SV=2	5.61	40931.4	6626.75	15	52.54	213.609	212.118	190.297	182.529	263.776	205.8	213.913	221.392	214.177	175.493	244.973	262.786	328.462	322.8	376.478	378.857	297.987	345.646	361.791	333.902	209.31	325.368
GNAI2	P04899	GNAI2_HUMAN	Guanine nucleotide-binding protein G(i) subunit alpha-2 OS=Homo sapiens OX=9606 GN=GNAI2 PE=1 SV=3	5.2	41021.3	6162.9	16	58.87	242.568	240.499	268.347	246.843	342.016	273.777	275.852	279.983	238.983	201.966	294.593	270.327	319.048	318.816	360.557	336.69	334.283	324.809	361.016	323.601	261.083	324.374
GNG12	Q9UBI6	GBG12_HUMAN	Guanine nucleotide-binding protein G(I)/G(S)/G(O) subunit gamma-12 OS=Homo sapiens OX=9606 GN=GNG12 PE=1 SV=3	9.48	8120.29	14017.2	4	59.72	20.9042	18.6695	49.8066	49.7107	65.7402	53.1242	38.045	42.1034	23.2924	18.5503	8.12907		14.7297	15.427	12.1319	10.6316	10.1824	10.1117			37.9946	11.6205
GNG3	P63215	GBG3_HUMAN	Guanine nucleotide-binding protein G(I)/G(S)/G(O) subunit gamma-3 OS=Homo sapiens OX=9606 GN=GNG3 PE=1 SV=1	7.83	8532.89	3195.27	2	60	23.8067	21.7923	20.6359	18.779	28.661	16.9898	14.2332	17.3852	18.4803	12.3589	18.5323	19.1938	26.6105	26.7361	28.2352	22.8925	21.6517	15.3571	27.8973	21.8438	19.3122	22.895
GNG7	O60262	GBG7_HUMAN	Guanine nucleotide-binding protein G(I)/G(S)/G(O) subunit gamma-7 OS=Homo sapiens OX=9606 GN=GNG7 PE=1 SV=1	8.87	7635.83	24654.1	6	76.47	117.41	110.308	91.3001	83.9726	127.662	104	104.642	107.559	120.756	95.9591	153.938	133.212	159.06	164.898	183.394	182.071	159.783	151.362	208.479	192.474	106.357	168.867
GNB1	P62873	GBB1_HUMAN	Guanine nucleotide-binding protein G(I)/G(S)/G(T) subunit beta-1 OS=Homo sapiens OX=9606 GN=GNB1 PE=1 SV=3	5.56	38175.4	21588.2	14	84.41	858.202	867.585	981.997	867.73	1206.59	994.048	923.811	978.634	853.963	713.708	1033.42	962.225	1162.18	1325.1	1294.65	1281.07	1214.6	1196.33	1200.01	1254.97	924.627	1192.46
GNB2	P62879	GBB2_HUMAN	Guanine nucleotide-binding protein G(I)/G(S)/G(T) subunit beta-2 OS=Homo sapiens OX=9606 GN=GNB2 PE=1 SV=3	5.56	38072.5	9434.26	13	69.71	227.471	221.231	274.599	256.586	374.525	287.769	253.924	270.034	228.855	177.356	241.965	225.297	267.122	301.881	284.392	294.395	268.73	283.09	283.382	284.362	257.235	273.461
GNB3	P16520	GBB3_HUMAN	Guanine nucleotide-binding protein G(I)/G(S)/G(T) subunit beta-3 OS=Homo sapiens OX=9606 GN=GNB3 PE=1 SV=1	5.28	38190.7	1110.2	5	25.59	18.6524	24.5769	23.6839	18.9692	28.3235	23.2281	20.272	23.4165	19.966	16.8053	14.4107	12.1421	14.8331	13.9732	13.8797	14.5252	14.6136	18.0838	16.0005	13.7911	21.7894	14.6253
GNAO1	P09471	GNAO_HUMAN	Guanine nucleotide-binding protein G(o) subunit alpha OS=Homo sapiens OX=9606 GN=GNAO1 PE=1 SV=4	5.2	40620.9	7189.55	14	54.24	569.679	504.496	614.761	554.6	767.135	634.952	544.277	528.199	565.802	478.95	690.86	642.31	998.115	919.549	873.423	880.973	830.863	805.687	946.717	814.282	576.285	840.278
GNAL	P38405	GNAL_HUMAN	Guanine nucleotide-binding protein G(olf) subunit alpha OS=Homo sapiens OX=9606 GN=GNAL PE=1 SV=1	6.25	44821.8	1710.7	6	30.71	41.8073	36.5878	52.8198	46.0611	75.196	55.8138	25.8136	33.6342	39.3427	25.5225	28.2605	32.3118	16.9232	45.2569	19.5318	14.8269	35.4554	36.4139	16.2015	24.9739	43.2599	27.0156
GNAQ	P50148	GNAQ_HUMAN	Guanine nucleotide-binding protein G(q) subunit alpha OS=Homo sapiens OX=9606 GN=GNAQ PE=1 SV=4	5.35	42427.3	3113.31	14	54.04	207.963	210.143	239.318	221.135	276.737	223.107	228.913	226.704	218.149	191.622	264.845	262.029	349.366	353.645	372.048	325.573	274.065	271.29	335.688	348.365	224.379	315.691
GNAS	Q5JWF2	GNAS1_HUMAN	Guanine nucleotide-binding protein G(s) subunit alpha isoforms XLas OS=Homo sapiens OX=9606 GN=GNAS PE=1 SV=2	4.73	111766	2235.16	12	24.59	415.03	325.819	369.043	360.878	467.402	356.376	370.847	357.653	361.799	282.573	396.196	354.346	463.455	568.107	579.966	677.429	442.814	435.365	722.666	538.568	366.742	517.891
GNAT1	P11488	GNAT1_HUMAN	Guanine nucleotide-binding protein G(t) subunit alpha-1 OS=Homo sapiens OX=9606 GN=GNAT1 PE=1 SV=5	5.28	40497.1	1689.21	6	21.14	14.9119	14.5294	17.0672	7.35256	21.4601	7.24295	14.4225	6.81105	15.6794	11.3095	18.9039	17.8326	20.6509	29.5055	38.673	25.2825	19.6486	11.5389	25.3917	31.597	13.0787	23.9025
GNAT2	P19087	GNAT2_HUMAN	Guanine nucleotide-binding protein G(t) subunit alpha-2 OS=Homo sapiens OX=9606 GN=GNAT2 PE=1 SV=4	4.93	40746.2	1715.76	4	11.02	31.6741	33.5997	32.9919	32.3265	48.3936	35.5688	29.3818	30.0574	23.3922	22.3714	14.1612	16.4562	15.129	15.9191	22.6478	18.8139	15.0892	18.9253	18.3107	16.7852	31.9757	17.2238
GNAT3	A8MTJ3	GNAT3_HUMAN	Guanine nucleotide-binding protein G(t) subunit alpha-3 OS=Homo sapiens OX=9606 GN=GNAT3 PE=2 SV=2	5.63	40870.3	1689.21	3	13.28											19.6835	18.3738	27.764	22.1955	39.1702	26.2158	20.5333	11.8906	36.0397	24.0003	0	24.5867
GNAZ	P19086	GNAZ_HUMAN	Guanine nucleotide-binding protein G(z) subunit alpha OS=Homo sapiens OX=9606 GN=GNAZ PE=1 SV=3	7.5	41437.1	871.731	6	23.38	95.164	99.7605	70.186	57.3195	93.2181	73.9615	80.9212	80.0213	103.786	80.3607	129.354	129.121	103.948	108.826	114.23	105.104	114.097	116.364	121.732	111.891	83.4699	115.467
GNA11	P29992	GNA11_HUMAN	Guanine nucleotide-binding protein subunit alpha-11 OS=Homo sapiens OX=9606 GN=GNA11 PE=1 SV=2	5.38	42408.6	1028.02	8	32.59	44.7263	42.6065	45.677	47.0262	64.9913	50.9762	42.2547	48.3708	48.9786	39.1843	55.8694	58.1253	78.4119	69.8303	88.3659	87.4183	67.8351	66.7532	103.297	87.8893	47.4792	76.3795
GNA12	Q03113	GNA12_HUMAN	Guanine nucleotide-binding protein subunit alpha-12 OS=Homo sapiens OX=9606 GN=GNA12 PE=1 SV=4	10.47	44450.4	1656.61	4	16.8	56.7355	49.1615	123.911	89.1272	132.307	103.788	36.3628	57.4482	24.5585	42.5389	32.9535	43.2331	19.932	44.1053	66.9351	25.6782	14.8285	16.2174	25.727	22.5719	71.5939	31.2182
GNA13	Q14344	GNA13_HUMAN	Guanine nucleotide-binding protein subunit alpha-13 OS=Homo sapiens OX=9606 GN=GNA13 PE=1 SV=2	8	44391.8	1819.65	13	46.95	133.301	119.314	102.203	94.6127	128.125	105.702	91.4863	94.4612	83.1446	70.9669	124.591	149.391	234.309	169.461	236.71	267.508	95.5773	126.784	215.473	208.346	102.332	182.815
GNA14	O95837	GNA14_HUMAN	Guanine nucleotide-binding protein subunit alpha-14 OS=Homo sapiens OX=9606 GN=GNA14 PE=1 SV=1	5.72	42026.9	506.109	4	11.83	29.5413	17.9967	17.555	17.7509	32.1101	18.0565	17.4578	17.7758	16.7709	16.1391	43.1072	47.4648	37.1337	34.0615	67.172	57.6401	36.9146	39.8437	59.6929	50.332	20.1154	47.3362
GNB4	Q9HAV0	GBB4_HUMAN	Guanine nucleotide-binding protein subunit beta-4 OS=Homo sapiens OX=9606 GN=GNB4 PE=1 SV=3	5.58	38308.6	9100.55	8	64.71	189.954	170.312	127.148	123.26	184.738	147.223	151.119	156.949	118.079	112.775	227.251	206.479	146.552	169.936	120.691	151.421	184.246	195.64	136.564	148.962	148.156	168.774
HP	P00738	HPT_HUMAN	Haptoglobin OS=Homo sapiens OX=9606 GN=HP PE=1 SV=1	6.15	45889.7	373.8	2	7.88	54.9675	54.5112	201.2	163.821	131.145	90.6595	258.972	235.232	36.1906	22.3278											124.903	0
HSPA12A	O43301	HS12A_HUMAN	Heat shock 70 kDa protein 12A OS=Homo sapiens OX=9606 GN=HSPA12A PE=1 SV=2	6.35	75263.6	4720.03	26	55.7	728.712	653.305	470.123	463.523	705.225	711.732	584.951	580.821	570.919	575.012	891.683	843.295	887.31	854.004	642.049	636.332	908.823	901.12	523.119	414.518	604.432	750.225
HSPA1L	P34931	HS71L_HUMAN	Heat shock 70 kDa protein 1-like OS=Homo sapiens OX=9606 GN=HSPA1L PE=1 SV=2	5.66	70774.3	4938.5	13	32.14	168.127	153.879	211.87	182.835	230.293	173.239	158.757	151.718	133.482	109.116	66.6668	82.8306	64.6752	69.3266	92.2717	88.839	71.6669	67.4354	69.0831	63.0785	167.332	73.5874
HSPA4	P34932	HSP74_HUMAN	Heat shock 70 kDa protein 4 OS=Homo sapiens OX=9606 GN=HSPA4 PE=1 SV=4	4.91	95186.5	623.917	24	46.67	268.706	272.759	254.282	230.348	327.994	250.086	251.232	266.825	259.415	198.289	90.1453	81.9754	89.9132	99.0462	93.1873	83.0569	97.6756	101.623	82.7428	58.3252	257.994	87.7691
HSPA6	P17066	HSP76_HUMAN	Heat shock 70 kDa protein 6 OS=Homo sapiens OX=9606 GN=HSPA6 PE=1 SV=2	5.75	71484.5	4754.96	9	27.06	233.963	241.719	229.287	198.106	246.421	202.672	221.05	233.763	204.053	206.649	209.881	293.235	360.07	274.743	283.9	354.304	183.871	282.885	282.07	323.801	221.768	284.876
HSPA8	P11142	HSP7C_HUMAN	Heat shock cognate 71 kDa protein OS=Homo sapiens OX=9606 GN=HSPA8 PE=1 SV=1	5.2	71126.3	10988.9	32	62.54	1961.94	1856.23	1587.5	1389.81	1940.88	1583.85	1808.95	1810.49	1740.99	1271.71	707.238	675.339	525.919	554.785	524.501	532.858	623.534	582.637	583.586	545.602	1695.24	585.6
TRAP1	Q12931	TRAP1_HUMAN	Heat shock protein 75 kDa_ mitochondrial OS=Homo sapiens OX=9606 GN=TRAP1 PE=1 SV=3	8.31	80395.3	1989.78	5	19.18	300.25	240.706	89.7094	130.687	182.367		155.657	75.0882	51.2245	64.7368	1062.21	825.34		256.602			507.166	348.12			143.381	599.887
HSPB1	P04792	HSPB1_HUMAN	Heat shock protein beta-1 OS=Homo sapiens OX=9606 GN=HSPB1 PE=1 SV=2	5.99	22839.6	2437.89	5	44.39	92.0324	84.6865	155.962	149.376	199.619	132.884	101.811	110.837	53.3468	48.8149	63.1515	78.3501	71.539	69.0764	68.0977	70.2604	61.3447	67.6614	39.4143	63.3773	112.937	65.2273
HSP90AA2P	Q14568	HS902_HUMAN	Heat shock protein HSP 90-alpha A2 OS=Homo sapiens OX=9606 GN=HSP90AA2P PE=1 SV=2	4.38	39478.9	1786.54	10	32.07	141.836	155.294	168.173	168.995	157.626	174.389	156.106	156.111	107.062	102.944	29.214	37.5177	24.1623	15.1258	6.54575	13.7299	31.2847	34.3909	19.7613	16.7553	148.854	22.8488
HSP90AA1	P07900	HS90A_HUMAN	Heat shock protein HSP 90-alpha OS=Homo sapiens OX=9606 GN=HSP90AA1 PE=1 SV=5	4.75	85059.1	7831.07	34	58.88	1112.83	1075.12	1124.8	999.208	1409.46	1096.73	1264.8	1224.37	959.399	712.038	373.76	589.204	491.598	552.864	432.825	516.464	525.369	429.323	545.159	645.915	1097.88	510.248
HSP90AB1	P08238	HS90B_HUMAN	Heat shock protein HSP 90-beta OS=Homo sapiens OX=9606 GN=HSP90AB1 PE=1 SV=4	4.77	83606.5	6501.61	30	55.66	572.729	534.987	557.288	527.919	624.468	510.555	661.267	655.478	483.205	422.767	316.514	287.183	191.537	188.193	137.047	129.17	275.415	254.66	166.589	153.689	555.066	210
HSPA2	P54652	HSP72_HUMAN	Heat shock-related 70 kDa protein 2 OS=Homo sapiens OX=9606 GN=HSPA2 PE=1 SV=1	5.42	70306.2	9548.46	30	61.82	962.528	871.09	949.591	819.461	1054.88	876.282	937.765	891.848	883.655	693.05	717.828	685.341	673.92	727.609	641.388	658.633	654.374	648.302	726.469	719.287	894.016	685.315
HEPACAM	Q14CZ8	HECAM_HUMAN	Hepatocyte cell adhesion molecule OS=Homo sapiens OX=9606 GN=HEPACAM PE=1 SV=1	9.5	46254.6	1303.82	9	26.2	148.244	148.223	300.274	276.142	334.877	254.998	229.668	230.264	131.411	119.438	122.458	107.392	291.381	280.737	197.96	184.42	190.525	190.716	137.843	119.076	217.354	182.251
HNRNPA1	P09651	ROA1_HUMAN	Heterogeneous nuclear ribonucleoprotein A1 OS=Homo sapiens OX=9606 GN=HNRNPA1 PE=1 SV=5	9.45	38860.8	477.77	3	12.1	80.5441	81.8923	80.4538	60.2215	95.7663	52.987	51.1027	56.7396	70.2312	36.0961		28.4533						18.4814			66.6035	23.4673
HNRNPD	Q14103	HNRPD_HUMAN	Heterogeneous nuclear ribonucleoprotein D0 OS=Homo sapiens OX=9606 GN=HNRNPD PE=1 SV=1	7.92	38605.3	425.444	2	9.3	86.2261	87.7667	141.729	133.71	139.822	112.103	109.516	112.559	84.795	76.9629		66.8305									108.519	66.8305
HNRNPK	P61978	HNRPK_HUMAN	Heterogeneous nuclear ribonucleoprotein K OS=Homo sapiens OX=9606 GN=HNRNPK PE=1 SV=1	5.22	51261.5	2091.83	11	36.93	158.634	160.791	248.42	238.316	260.976	212.336	209.416	215.078	166.873	147.7	81.262	82.2816	106.586	94.7683	195.005	190.041	150.192	69.0566	197.982	187.236	201.854	135.441
HNRNPU	Q00839	HNRPU_HUMAN	Heterogeneous nuclear ribonucleoprotein U OS=Homo sapiens OX=9606 GN=HNRNPU PE=1 SV=6	5.66	91325.9	407.854	5	10.18	174.025	175.945	344.595	295.402	275.307	209.38	266.321	254.64	245.431	178.991	289.499	180.434	173.049	170.724	98.1296	84.8682	91.517	83.6457	135.452	128.875	242.004	143.619
HNRNPA2B1	P22626	ROA2_HUMAN	Heterogeneous nuclear ribonucleoproteins A2/B1 OS=Homo sapiens OX=9606 GN=HNRNPA2B1 PE=1 SV=2	9.27	37486.8	1368.65	12	42.78	108.384	105.164	230.614	195.066	208.781	152.34	160.197	141.1	115.055	106.561	66.8016	86.224	29.608	34.681	53.9942	40.0592	43.1453	46.3848	70.4658	48.0307	152.326	51.9395
HK1	P19367	HXK1_HUMAN	Hexokinase-1 OS=Homo sapiens OX=9606 GN=HK1 PE=1 SV=3	6.38	103627	525.721	12	17.56	316.019	303.771	300.213	279.579	399.955	321.163	270.479	274.457	339.155	278.791	366.654	350.127	424.528	435.653	362.648	364.086	437.159	418.205	346.223	347.279	308.358	385.256
HPCAL1	P37235	HPCL1_HUMAN	Hippocalcin-like protein 1 OS=Homo sapiens OX=9606 GN=HPCAL1 PE=1 SV=3	5.03	22427.3	381.791	3	22.28	39.0504	42.4375	28.9967	34.2992	57.6388	24.8119	18.6465	17.8404	18.9409	21.4544	42.9947	23.5527	20.5931	33.8521	16.0827	14.499	21.5171	17.6196	16.9718	15.8446	30.4117	22.3527
HPCAL4	Q9UM19	HPCL4_HUMAN	Hippocalcin-like protein 4 OS=Homo sapiens OX=9606 GN=HPCAL4 PE=1 SV=3	4.56	22373.5	627.386	2	24.08	26.0095	25.6351	28.9212	27.2288	37.577	36.3136	28.127	29.7281	27.5898	23.1831											29.0313	0
HINT1	P49773	HINT1_HUMAN	Histidine triad nucleotide-binding protein 1 OS=Homo sapiens OX=9606 GN=HINT1 PE=1 SV=2	6.52	13916	2244.56	2	44.44	69.7413	67.1396	54.3701	54.6056	78.8929	64.6004	66.503	67.4579	55.7181	52.8062	41.3602	40.7233	37.5774	32.2089	21.7017	15.2255	32.8651	32.879	14.9997	15.6291	63.1835	28.517
HDAC11	Q96DB2	HDA11_HUMAN	Histone deacetylase 11 OS=Homo sapiens OX=9606 GN=HDAC11 PE=1 SV=1	7.53	39297.2	912.757	5	19.6	56.4915	59.2388	49.0572	34.1277	71.6362	61.8107	51.6817	65.9882	50.0448	42.5837	80.1841	78.7598	133.321	120.253	152.03	146.219	113.033	112.806	142.207	140.191	54.266	121.901
H1-2	P16403	H12_HUMAN	Histone H1.2 OS=Homo sapiens OX=9606 GN=H1-2 PE=1 SV=2	11.7	21364.8	3237.48	5	27.23	213.69	203.317	812.358	680.987	313.678	264.904	352.523	364.891	225.604	182.476	176.842	150.232	272.519	276.191	171.269	154.753	117.989	110.515	235.888	162.5	361.443	182.87
HIST1H1T	P22492	H1T_HUMAN	Histone H1t OS=Homo sapiens OX=9606 GN=HIST1H1T PE=2 SV=4	12.27	22019	1897.94	3	15.46	29.9779	28.2281	53.5994	51.2322	56.7042	41.0202	45.0695	42.098	34.3977	25.8168	13.7722	11.9901	16.0637	15.9059	14.5755	13.3964	10.6318	10.167	15.2595	14.0794	40.8144	13.5842
H3-3A	P84243	H33_HUMAN	Histone H3.3 OS=Homo sapiens OX=9606 GN=H3-3A PE=1 SV=2	11.81	15385	10966.1	5	44.85	197.498	180.127	453.465	368.707	336.546	253.27	349.804	351.995	193.921	155.018	101.28	103.464	89.1617	94.9023	39.0891	41.7277	26.7292	29.113	61.0774	54.1536	284.035	64.0699
H4C1	P62805	H4_HUMAN	Histone H4 OS=Homo sapiens OX=9606 GN=H4C1 PE=1 SV=2	11.89	11367.4	22190.5	7	58.25	365.096	341.311	872.92	694.579	527.261	470.55	660.053	503.019	478.684	328.158	274.378	243.074	229.707	235.096	92.8165	90.9669	74.7219	69.8754	147.69	136.326	524.163	159.465
HRNR	Q86YZ3	HORN_HUMAN	Hornerin OS=Homo sapiens OX=9606 GN=HRNR PE=1 SV=2	10.22	283303	2453.3	21	17.3	313.863	411.93	292.005	742.117	3296.48	780.095	967.072	514.474	558.895	3502.01	631.359	2231.27	873.906	1520.15	307.285	590.155	505.979	1570.9	591.767	895.692	1137.89	971.847
ST13	P50502	F10A1_HUMAN	Hsc70-interacting protein OS=Homo sapiens OX=9606 GN=ST13 PE=1 SV=2	5	41502.9	788.705	6	24.12	156.197	154.749	196.571	186.095	232.456	180.172	193.309	189.552	146.016	126.354	44.9742	44.8973	49.1645	51.2154	61.0873	56.3	37.9369	44.4645	49.1939	63.7643	176.147	50.2998
HAPLN2	Q9GZV7	HPLN2_HUMAN	Hyaluronan and proteoglycan link protein 2 OS=Homo sapiens OX=9606 GN=HAPLN2 PE=2 SV=1	8.88	38402.4	6300.98	11	37.65	996.6	941.511	352.472	348.481	461.562	376.834	558.476	574.713	759.245	645.019	300.853	321.98	96.7641	133.537	143.66	128.469	190.428	199.913	248.951	229.251	601.491	199.381
HPRT1	P00492	HPRT_HUMAN	Hypoxanthine-guanine phosphoribosyltransferase OS=Homo sapiens OX=9606 GN=HPRT1 PE=1 SV=2	6.27	24807.5	2147.31	8	51.38	91.0502	90.478	66.6087	71.8578	87.6451	82.0707	83.7764	82.3692	81.2585	73.9987											81.1113	0
	P0DOX5	IGG1_HUMAN	Immunoglobulin gamma-1 heavy chain OS=Homo sapiens OX=9606 PE=1 SV=2	8.83	49956.2	1057.75	8	29.62	224.173	192.26	334.416	299.04	286.295	202.367	376.551	369.108	125.587	79.8524	201.07	191.46	492.65	441.749	290.524	302.018	358.609	329.439	141.781	104.204	248.965	285.35
IGKC	P01834	IGKC_HUMAN	Immunoglobulin kappa constant OS=Homo sapiens OX=9606 GN=IGKC PE=1 SV=2	6.13	11936.1	1476.08	5	64.49	28.6557	25.6625	48.9865	45.293	41.8597	23.7973	56.406	61.5827	13.8268	12.5844	27.1257	21.381	62.7233	54.1938	36.3158	38.1266	48.4139	60.5232	26.6617	13.0203	35.8654	38.8485
IGSF8	Q969P0	IGSF8_HUMAN	Immunoglobulin superfamily member 8 OS=Homo sapiens OX=9606 GN=IGSF8 PE=1 SV=1	7.9	65661.6	4434.59	18	45.68	338.917	317.279	296.273	276.068	382.781	279.2	308.307	307.02	404.959	349.255	304.299	288.112	365.999	368.424	456.035	438.213	288.245	298.91	628.175	587.787	326.006	402.42
INF2	Q27J81	INF2_HUMAN	Inverted formin-2 OS=Homo sapiens OX=9606 GN=INF2 PE=1 SV=2	5.09	136936	569.816	12	20.74	210.433	219.832	302.203	208.342	172.699	213.013	210.669	202.739	229.012	193.409	275.406	264.151	351.718	338.685	278.146	256.758	316.41	332.076	310.707	287.856	216.235	301.191
IDH2	P48735	IDHP_HUMAN	Isocitrate dehydrogenase [NADP]_ mitochondrial OS=Homo sapiens OX=9606 GN=IDH2 PE=1 SV=2	8.91	51365.6	1205.12	9	30.31	137.083	133.422	167.282	147.18	168.253	128.073	148.813	155.99	142.471	124.784	161.966	158.345	160.426	153.579	141.013	137.627	165.088	161.491	190.495	152.657	145.335	158.269
JAM3	Q9BX67	JAM3_HUMAN	Junctional adhesion molecule C OS=Homo sapiens OX=9606 GN=JAM3 PE=1 SV=1	7.46	35590.3	1682.66	7	37.42	84.9352	87.858	133.289	125.479	139.728	107.066	125.684	132.886	113.389	105.035	129.039	121.687	248.52	246.088	219.223	209.735	185.145	201.054	196.155	228.443	115.535	198.509
CRYM	Q14894	CRYM_HUMAN	Ketimine reductase mu-crystallin OS=Homo sapiens OX=9606 GN=CRYM PE=1 SV=1	4.88	33946.7	1847.4	10	49.36	290.649	265.132	223.377	206.827	323.138	244.659	209.018	193.485	193.138	156.561	55.4431	59.3885	69.6628	69.6051	44.4393	36.0111	24.3749	26.1207	51.8817	46.3441	230.598	48.3271
KIF15	Q9NS87	KIF15_HUMAN	Kinesin-like protein KIF15 OS=Homo sapiens OX=9606 GN=KIF15 PE=1 SV=1	5.67	161130	532.082	4	5.26	2118.56	1439.1	1306.77	1213.12	1457.82	1167.09	1370.06	1409.83	1024.76	833.517	1517.7	1310.67	3491.41	1139.65	717.743	1075.08	1612.72	1371.49	1786.06	798.425	1334.06	1482.09
GLO1	Q04760	LGUL_HUMAN	Lactoylglutathione lyase OS=Homo sapiens OX=9606 GN=GLO1 PE=1 SV=4	4.94	21005.9	2385.21	8	53.8	74.9062	77.2091	102.773	84.7394	125.515	82.8416	60.189	80.9122	62.8368	53.5866		12.5591	17.2245	22.0526		22.0113	16.6143	19.7892	17.2967	14.1684	80.5509	17.7145
CRYL1	Q9Y2S2	CRYL1_HUMAN	Lambda-crystallin homolog OS=Homo sapiens OX=9606 GN=CRYL1 PE=1 SV=3	5.78	35932.5	1074.65	8	34.48	99.5663	98.4972	146.227	139.095	184.897	136.232	109.51	110.546	74.4612	58.5048				18.6203			24.9053	23.1354		32.3463	115.754	24.7518
LLGL1	Q15334	L2GL1_HUMAN	Lethal(2) giant larvae protein homolog 1 OS=Homo sapiens OX=9606 GN=LLGL1 PE=1 SV=3	5.87	116730	535.909	17	26.79	378.676	391.391	452.725	477.663	1006.39	845.994	824.262	908.602	396.518	288.315	562.895	439.166	622.097	687.638	1182.96	1151.08	1000.64	956.497	626.283	555.898	597.054	778.515
LGI3	Q8N145	LGI3_HUMAN	Leucine-rich repeat LGI family member 3 OS=Homo sapiens OX=9606 GN=LGI3 PE=2 SV=1	7.82	62445.9	760.329	6	12.96	114.416	107.244	70.7555	71.8875	99.2729	64.3126	79.8216	89.8017	81.4333	64.2946	158.874	162.334	144.736	172.428	197.806	194.555	141.045	138.766	179.262	173.438	84.324	166.324
LSAMP	Q13449	LSAMP_HUMAN	Limbic system-associated membrane protein OS=Homo sapiens OX=9606 GN=LSAMP PE=1 SV=2	6.62	37906.8	1260.74	6	24.85	85.5598	82.7427	103.955	91.8295	112.485	84.4179	91.8466	89.6805	88.798	74.3123	66.2146	75.9381	109.51	119.786	104.172	91.5273	95.8595	89.4754	106.692	98.1495	90.5627	95.7324
LDHA	P00338	LDHA_HUMAN	L-lactate dehydrogenase A chain OS=Homo sapiens OX=9606 GN=LDHA PE=1 SV=2	8.38	36973.9	5438.73	16	73.19	401.386	405.544	424.204	387.431	532.702	518.1	419.047	436.45	418.693	353.285	84.6274	78.0323	61.7616	65.6888	65.7579	64.7425	101.085	99.9594	117.181	83.1591	429.684	82.1995
LDHAL6A	Q6ZMR3	LDH6A_HUMAN	L-lactate dehydrogenase A-like 6A OS=Homo sapiens OX=9606 GN=LDHAL6A PE=2 SV=1	6.59	36849.6	1770.41	2	7.83	28.116	40.813	28.2297	38.3775	37.6071	49.7143	27.9463	42.6313	26.201	29.6611											34.9297	0
LDHB	P07195	LDHB_HUMAN	L-lactate dehydrogenase B chain OS=Homo sapiens OX=9606 GN=LDHB PE=1 SV=2	5.66	36923.7	12501.8	18	55.99	1227.35	1233.18	1304.16	1222.08	1522.97	1454.79	1268.69	1302.55	1013.4	869.895	106.864	94.2766	86.4705	87.3227	86.5733	83.6346	114.945	105.376	131.716	105.602	1241.91	100.278
LDHC	P07864	LDHC_HUMAN	L-lactate dehydrogenase C chain OS=Homo sapiens OX=9606 GN=LDHC PE=1 SV=4	7.25	36653.5	1688.32	3	10.24	115.334	137.135	158.21	116.062	222.391	180.641	120.739	124.574	97.4672	128.87											140.142	0
LYNX1	P0DP58	LYNX1_HUMAN	Ly-6/neurotoxin-like protein 1 OS=Homo sapiens OX=9606 GN=LYNX1 PE=1 SV=1	7.72	13211.3	4186.08	2	19.83	17.3175	27.7326	27.4335	27.3648	24.5811	17.7026	17.837	19.1934	17.8395	24.5159	45.3754	39.6441	56.0252	70.9345	71.4305	63.5793	47.9701	47.4669	65.6676	58.4611	22.1518	56.6555
MIF	P14174	MIF_HUMAN	Macrophage migration inhibitory factor OS=Homo sapiens OX=9606 GN=MIF PE=1 SV=4	7.98	12647.4	4281.41	2	26.09	264.407	213.695	163.859	148.541	221.343	199.229	173.142	231.212	204.712	185.233	206.149	154.561	135.476	191.707	148.53	163.15	192.162	169.356	210.893	194.286	200.537	176.627
PRNP	P04156	PRIO_HUMAN	Major prion protein OS=Homo sapiens OX=9606 GN=PRNP PE=1 SV=1	9.23	27889.4	855.496	5	29.25	69.9884	63.1913	78.0803	67.7217	104.402	82.0059	79.5957	79.9339	103.79	70.856	100.403	98.5356	162.722	188.339	178.374	170.829	136.711	135.169	238.589	213.181	79.9565	162.285
MDH1	P40925	MDHC_HUMAN	Malate dehydrogenase_ cytoplasmic OS=Homo sapiens OX=9606 GN=MDH1 PE=1 SV=4	7.19	36654.3	8538.38	15	49.1	1651.11	1619.76	1057.17	1013.8	1452.98	1252.08	1369.67	1336.66	1461.79	1161	116.821	115.9	96.431	92.1339	103.703	95.2122	101.943	103.535	163.536	151.528	1337.6	114.074
MDH2	P40926	MDHM_HUMAN	Malate dehydrogenase_ mitochondrial OS=Homo sapiens OX=9606 GN=MDH2 PE=1 SV=3	8.86	35959.6	9118.29	18	65.38	397.775	386.796	517.319	466.56	668.597	550.178	448.759	422.199	424.502	350.93	294.179	267.005	358.741	313.828	210.658	230.44	304.918	285.181	232.032	210.909	463.361	270.789
MPI	P34949	MPI_HUMAN	Mannose-6-phosphate isomerase OS=Homo sapiens OX=9606 GN=MPI PE=1 SV=2	5.57	47226.3	383.296	2	13	72.1854	54.2892	68.7521	64.3613	87.7538	71.3536	72.7607	63.3054	29.1162	22.826											60.6704	0
MAP6D1	Q9H9H5	MA6D1_HUMAN	MAP6 domain-containing protein 1 OS=Homo sapiens OX=9606 GN=MAP6D1 PE=1 SV=1	10.6	21175.6	1446.59	4	43.22	71.3112	71.0781	82.2999	80.1084	150.201	117.576	140.522	130.784	109.125	87.9538	88.0119	94.8371	62.8915	126.371	281.991	271.414	199.279	196.369	165.996	148.895	104.096	163.605
MARCKSL1	P49006	MRP_HUMAN	MARCKS-related protein OS=Homo sapiens OX=9606 GN=MARCKSL1 PE=1 SV=2	4.45	19585.8	2108.45	4	51.28	52.6952	58.7346	64.0019	56.7002	71.0365	52.8703	59.4059	63.4815	63.4222	51.4997	28.4549	15.8365	30.1714	25.028	35.2379	29.825	28.2174	20.9521	57.8378	42.7089	59.3848	31.427
PGRMC1	O00264	PGRC1_HUMAN	Membrane-associated progesterone receptor component 1 OS=Homo sapiens OX=9606 GN=PGRMC1 PE=1 SV=3	4.34	21785.2	2387.61	7	52.31	80.4713	87.365	75.7095	76.8405	100.445	64.958	77.5611	75.3223	65.1682	59.0495	75.0159	70.494	61.5223	67.8036	58.9446	46.42	79.0558	77.1272	71.539	47.8145	76.289	65.5737
SELENBP1	Q13228	SBP1_HUMAN	Methanethiol oxidase OS=Homo sapiens OX=9606 GN=SELENBP1 PE=1 SV=2	5.94	52961.3	625.738	8	23.31	120.068	119.614	166.987	165.579	223.999	168.047	157.75	155.425	91.5426	71.2646	46.6606	43.6823	58.424	56.0397	50.676	65.0632	54.4831	49.9079	60.388	52.4547	144.028	53.778
ALDH6A1	Q02252	MMSA_HUMAN	Methylmalonate-semialdehyde dehydrogenase [acylating]_ mitochondrial OS=Homo sapiens OX=9606 GN=ALDH6A1 PE=1 SV=2	8.61	58296.1	1462.38	14	37.2	239.744	244.065	375.581	334.425	334.781	245.227	334.665	337.076	233.404	207.622	253.827	224.792	449.307	466.66	271.888	275.694	314.236	324.309	252.645	248.443	288.659	308.18
IMMT	Q16891	MIC60_HUMAN	MICOS complex subunit MIC60 OS=Homo sapiens OX=9606 GN=IMMT PE=1 SV=1	6.07	84077.2	785.175	2	6.2	167.09	126.841	98.9396	136.608	122.986	106.638	106.173	122.245	109.513	117.387	138.458	116.465	137.494	161.358	120.122	120.135	129.455	149.499	146.596	146.783	121.442	136.637
MAP1A	P78559	MAP1A_HUMAN	Microtubule-associated protein 1A OS=Homo sapiens OX=9606 GN=MAP1A PE=1 SV=6	4.66	306968	707.324	49	33.86	1877.14	1626.22	1580.68	1470.96	2099.36	1435.74	1567.34	1525.57	1582.09	1282.92	1389.38	1289.5	987.207	905.97	999.47	1107.36	1280.37	1374.81	1152.45	1072.92	1604.8	1155.94
MAP1B	P46821	MAP1B_HUMAN	Microtubule-associated protein 1B OS=Homo sapiens OX=9606 GN=MAP1B PE=1 SV=2	4.54	271832	2548.16	81	56.24	4459.58	4244	3287.97	3299.97	4714.28	3657.7	3784.97	3809.8	3900.08	3198.94	3268.8	3040.56	2932.35	2668.39	2544.93	2454.05	4581.88	4462.08	2852.46	2377.96	3835.73	3118.35
MAP4	P27816	MAP4_HUMAN	Microtubule-associated protein 4 OS=Homo sapiens OX=9606 GN=MAP4 PE=1 SV=3	5.14	121518	846.528	16	25.95	274.281	265.203	375.267	334.785	519.225	390.111	296.824	295.997	287.233	241.148	178.194	168.281	180.078	185.489	197.477	159.658	170.675	163.232	197.485	177.419	328.007	177.799
MAPRE1	Q15691	MARE1_HUMAN	Microtubule-associated protein RP/EB family member 1 OS=Homo sapiens OX=9606 GN=MAPRE1 PE=1 SV=3	4.83	30170.2	693.353	8	47.76	57.6247	78.7933	58.184	39.1419	77.1481	46.47	55.891	50.1224	52.8119	42.4051	34.2714	27.9219	39.9006	44.4137	50.1759	36.6234	37.7077	34.0654	55.4102	43.5265	55.8592	40.4017
MAPRE2	Q15555	MARE2_HUMAN	Microtubule-associated protein RP/EB family member 2 OS=Homo sapiens OX=9606 GN=MAPRE2 PE=1 SV=1	5.24	37259.5	1304.27	10	57.49	148.621	117.861	102.911	95.2673	154.509	111.259	113.197	115.185	143.234	104.815	178.339	157.762	135.797	161.972	166.619	134.113	169.065	148.485	173.608	148.9	120.686	157.466
MAPRE3	Q9UPY8	MARE3_HUMAN	Microtubule-associated protein RP/EB family member 3 OS=Homo sapiens OX=9606 GN=MAPRE3 PE=1 SV=1	5.2	32267.4	793.601	9	35.23	68.8525	72.4541	53.4832	55.3849	81.8705	60.3849	49.5058	51.6717	62.6703	48.7458	52.8076	48.3284	30.5254	34.4913	28.6173	25.2114	46.6546	59.7195	32.8916	32.1773	60.5024	39.1424
MAPT	P10636	TAU_HUMAN	Microtubule-associated protein tau OS=Homo sapiens OX=9606 GN=MAPT PE=1 SV=5	6.28	79155.8	1209.62	15	31.66	500.993	462.381	675.756	542.377	844.578	657.706	525.824	554.644	618.143	501.603	376.56	614.612	568.28	313.653	1254.34	1090.69	369.106	318.824	1203.24	1149.24	588.401	725.854
MAP1LC3A	Q9H492	MLP3A_HUMAN	Microtubule-associated proteins 1A/1B light chain 3A OS=Homo sapiens OX=9606 GN=MAP1LC3A PE=1 SV=2	9.17	14329.5	1028.16	2	17.36	115.926	109.948	96.5775	92.6928	139.925	109.764	105.968	110.783	116.034	83.8659	93.4226	80.9858	71.2959	66.4141	66.8489	55.9036	74.7007	73.9154	85.597	69.4836	108.148	73.8568
SLC25A22	Q9H936	GHC1_HUMAN	Mitochondrial glutamate carrier 1 OS=Homo sapiens OX=9606 GN=SLC25A22 PE=1 SV=1	9.66	34926.5	717.722	2	18.89	18.1857	31.2504	42.7294	24.1723	35.4583	33.3111	48.988		56.6536	43.013	52.0563	51.2974	92.5767	76.479	55.9453	51.1758	49.916	58.682	66.4697	71.8982	37.0847	62.6496
MAPK1	P28482	MK01_HUMAN	Mitogen-activated protein kinase 1 OS=Homo sapiens OX=9606 GN=MAPK1 PE=1 SV=3	6.57	41789	1720.16	15	53.89	200.65	157.165	250.428	223.152	296.795	218.433	205.344	181.386	153.109	129.707	172	145.453	152.095	177.789	128.006	140.893	157.364	144.745	162.995	142.325	201.617	152.366
MAPK3	P27361	MK03_HUMAN	Mitogen-activated protein kinase 3 OS=Homo sapiens OX=9606 GN=MAPK3 PE=1 SV=4	6.32	43477.8	924.827	9	34.83	94.8202	85.6628	83.9426	94.8068	139.604	87.0466	83.987	84.8379	80.503	79.1159	158.576	140.675	121.534	139.29	108.408	133.668	99.393	131.829	160.385	153	91.4326	134.676
MSN	P26038	MOES_HUMAN	Moesin OS=Homo sapiens OX=9606 GN=MSN PE=1 SV=3	6.03	67934.2	1383.3	24	50.26	417.154	399.298	648.048	563.82	549.957	401.33	537.233	543.499	481.387	541.68	446.668	627.724	1047.71	1210.25	626.108	620.782	876.874	875.912	1188.76	1266.01	508.34	878.679
BIN1	O00499	BIN1_HUMAN	Myc box-dependent-interacting protein 1 OS=Homo sapiens OX=9606 GN=BIN1 PE=1 SV=1	4.79	64927.6	2784.4	18	45.19	511.363	508.245	832.323	741.444	743.577	590.85	714.657	711.791	638.632	484.741	363.815	315.745	539.68	493.015	401.552	372.026	360.809	398.036	483.189	457.716	647.762	418.558
MBP	P02686	MBP_HUMAN	Myelin basic protein OS=Homo sapiens OX=9606 GN=MBP PE=1 SV=3	10.45	33117.1	31173.9	14	55.92	179438	170752	163071	152033	160642	154998	166597	169098	175481	164262	192176	162617	187710	184659	203684	217667	177298	164487	228070	188160	165637	190653
PMP2	P02689	MYP2_HUMAN	Myelin P2 protein OS=Homo sapiens OX=9606 GN=PMP2 PE=1 SV=3	10.54	15023.5	16306.8	11	71.21	666.277	642.376	206.579	196.56	285.65	233.325	387.047	385.647	525.476	428.005	873.864	745.274	341.025	352.827	412.981	400.343	541.257	523.827	915.438	834.332	395.694	594.117
PLP1	P60201	MYPR_HUMAN	Myelin proteolipid protein OS=Homo sapiens OX=9606 GN=PLP1 PE=1 SV=2	8.29	30875.6	33549.1	11	37.55	329733	349124	284440	304371	182761	285486	303763	317235	389013	299912	390084	369510	381002	373773	412329	398101	393321	375218	420359	456477	304584	397017
MAG	P20916	MAG_HUMAN	Myelin-associated glycoprotein OS=Homo sapiens OX=9606 GN=MAG PE=1 SV=1	4.79	69924	5404.17	15	33.39	1281.1	1297.04	1317.33	1211.63	1735.38	1434.07	1208.52	1326.16	1460.27	1254.02	2437.86	2121.98	2726.64	3373.95	3269.25	3321.66	2299.22	2351.44	3084.59	2864.32	1352.55	2785.09
MOBP	Q13875	MOBP_HUMAN	Myelin-associated oligodendrocyte basic protein OS=Homo sapiens OX=9606 GN=MOBP PE=1 SV=2	11.88	21358.2	9866.06	5	29.51	355.412	346.557	620.268	532.92	429.871	358.978	366.29	383.983	484.837	406.984	710.931	677.387	1849.39	1963.48	1262.27	1207.63	795.605	807.633	1561.14	1500.46	428.61	1233.59
MOG	Q16653	MOG_HUMAN	Myelin-oligodendrocyte glycoprotein OS=Homo sapiens OX=9606 GN=MOG PE=1 SV=2	8.59	28592.3	28011.1	12	49.8	4045.97	3861.78	4688.96	4357.66	3828.82	3849.06	3913.74	4225.77	5000.68	4157.88	6259.9	5317.03	9470.64	9577.41	8837.27	8786.24	6875.33	6682.63	10592.6	9846.35	4193.03	8224.54
MYADM	Q96S97	MYADM_HUMAN	Myeloid-associated differentiation marker OS=Homo sapiens OX=9606 GN=MYADM PE=1 SV=2	8.06	36072	2659.56	4	19.25	174.027	182.987	200.375	193.224	227.45	191.07	139.797	136.063	164.462	147.715	371.176	333.298	478.022	515.608	530.418	507.357	322.473	312.387	514.491	474.065	175.717	435.929
MARCKS	P29966	MARCS_HUMAN	Myristoylated alanine-rich C-kinase substrate OS=Homo sapiens OX=9606 GN=MARCKS PE=1 SV=4	4.26	31725.8	5475.78	6	44.28	206.613	201.03	550.49	427.323	547.903	399.822	313.719	326.683	216.988	164.593	65.7598	49.7606	75.1286	59.3246	65.2248	60.3861	57.4361	47.1245	48.2522	44.0409	335.516	57.2438
DDAH1	O94760	DDAH1_HUMAN	N(G)_N(G)-dimethylarginine dimethylaminohydrolase 1 OS=Homo sapiens OX=9606 GN=DDAH1 PE=1 SV=3	5.45	31464	6886.63	14	57.19	193.83	191.383	339.336	318.917	448.218	332.785	306.205	302.623	239.357	183.424	22.8308	18.8368	36.8869	37.0583	32.2013	28.265	29.5738	30.2299	34.977	32.3414	285.608	30.3201
DDAH2	O95865	DDAH2_HUMAN	N(G)_N(G)-dimethylarginine dimethylaminohydrolase 2 OS=Homo sapiens OX=9606 GN=DDAH2 PE=1 SV=1	5.61	29929	1019.62	10	51.93	61.677	74.7365	61.6209	56.9444	86.3055	74.15	57.7712	61.2058	69.1458	56.0786	22.5486	30.2289	30.9246	16.0471	28.2196	22.0558	23.549	19.346	42.8301	22.3851	65.9636	25.8135
SLC9A3R1	O14745	NHRF1_HUMAN	Na(+)/H(+) exchange regulatory cofactor NHE-RF1 OS=Homo sapiens OX=9606 GN=SLC9A3R1 PE=1 SV=4	5.45	39153.6	711.533	3	20.39	39.486	55.5495	121.894	103.246	172.142	116.557	83.2354	94.2677	79.1797	71.113	37.8998	35.269	55.1802	47.9168	48.8806	32.7803	38.5349		48.9703	35.8153	93.667	42.3608
SIRT2	Q8IXJ6	SIR2_HUMAN	NAD-dependent protein deacetylase sirtuin-2 OS=Homo sapiens OX=9606 GN=SIRT2 PE=1 SV=2	5.06	43809.5	19119.2	19	73.78	1194.42	1093.3	1527.77	1183.07	1301.1	1058.78	1345.74	1209.7	1419.16	1152.45	988.773	974.311	2064.16	2014.42	1804.78	1746.49	1388.86	1298.94	2783.66	2000.56	1248.55	1706.5
NDUFB11	Q9NX14	NDUBB_HUMAN	NADH dehydrogenase [ubiquinone] 1 beta subcomplex subunit 11_ mitochondrial OS=Homo sapiens OX=9606 GN=NDUFB11 PE=1 SV=1	4.94	17373.7	575.061	2	22.22	26.3345	27.0856	30.7212	30.2228	41.3299	32.6153	23.6864	25.1199	27.1736	23.0645	33.8288	32.7783	30.668	32.9003	20.3701	21.6043	31.1999	31.2719	15.429	19.5263	28.7354	26.9577
NDUFV1	P49821	NDUV1_HUMAN	NADH dehydrogenase [ubiquinone] flavoprotein 1_ mitochondrial OS=Homo sapiens OX=9606 GN=NDUFV1 PE=1 SV=4	8.16	51501.5	926.031	10	35.99	99.7066	103.401	70.8834	80.3342	103.072	78.2005	97.9128	90.0139	94.4203	67.8731	122.046	128.923	118.89	114.523	101.101	90.9639	102.857	123.415	66.0669	91.396	88.5818	106.018
CYB5R3	P00387	NB5R3_HUMAN	NADH-cytochrome b5 reductase 3 OS=Homo sapiens OX=9606 GN=CYB5R3 PE=1 SV=3	7.41	34463	973.829	7	37.21	81.2978	80.2667	67.6494	76.6053	93.4892	80.8517	86.7365	101.941	67.2873	55.3238	85.9072	86.9163	72.2026	96.6262	72.6219	79.86	106.598	104.76	62.5277	77.8551	79.1449	84.5875
NDUFS1	P28331	NDUS1_HUMAN	NADH-ubiquinone oxidoreductase 75 kDa subunit_ mitochondrial OS=Homo sapiens OX=9606 GN=NDUFS1 PE=1 SV=3	5.84	80494.2	770.809	16	38.51	216.86	218.717	207.556	186.537	207.751	164.695	167.533	164.872	222.629	155.769	223.123	210.993	234.602	234.027	190.695	198.514	241.753	234.43	198.006	181.394	191.292	214.754
NCAM1	P13591	NCAM1_HUMAN	Neural cell adhesion molecule 1 OS=Homo sapiens OX=9606 GN=NCAM1 PE=1 SV=3	4.6	95429.7	2623.26	31	56.41	842.909	829.118	1163.94	1157.35	1372.78	1042.2	1079.57	1034.52	881.748	764.187	600.36	551.361	1033.13	1014.46	974.935	920.902	930.918	882.939	890.182	870.13	1016.83	866.933
NCALD	P61601	NCALD_HUMAN	Neurocalcin-delta OS=Homo sapiens OX=9606 GN=NCALD PE=1 SV=2	5.05	22359.4	1519.34	6	37.82	92.9506	85.5096	50.1197	47.0179	62.3516	50.2547	42.7222	44.9063	43.1297	36.7057	51.5603	51.1105	19.7553	23.985	16.225	12.0698	27.145	21.4	18.3472	15.6913	55.5668	25.7289
NCDN	Q9UBB6	NCDN_HUMAN	Neurochondrin OS=Homo sapiens OX=9606 GN=NCDN PE=1 SV=1	5.19	80290.1	646.049	7	16.32	280.653	275.061	640.044	611.279	850.41	716.228	319.466	326.656	216.854	185.859	218.026	149.987	601.125	551.538	831.183	856.578	76.4457	73.1626		62.9203	442.251	380.107
NFASC	O94856	NFASC_HUMAN	Neurofascin OS=Homo sapiens OX=9606 GN=NFASC PE=1 SV=4	6.24	150882	1528.62	33	43.28	1869.17	1574	1980.37	1719.81	2588.24	1528.11	1801.5	1664.14	1653.32	1302.4	2412.06	2222.48	3178.3	3252.5	3292.77	3400.41	2547.35	2731.89	3224.43	2890.04	1768.1	2915.22
NEFH	P12036	NFH_HUMAN	Neurofilament heavy polypeptide OS=Homo sapiens OX=9606 GN=NEFH PE=1 SV=4	5.89	112707	10347.3	36	38.99	7340.84	7190.08	2246.99	2064.24	3372.67	2980.27	4447.46	4210.85	4663.17	3869.99	6612.71	6197.59	2186.34	2131.42	1316.34	1329.84	4864.37	4628.56	1430.24	1243.13	4238.66	3194.05
NEFL	P07196	NFL_HUMAN	Neurofilament light polypeptide OS=Homo sapiens OX=9606 GN=NEFL PE=1 SV=3	4.43	61573.7	45578.7	51	84.53	15868.4	15194.6	4632.88	4236.57	7206.84	6731.85	8705.07	8905.06	11463.1	9757.05	15364.2	13475.8	6105.14	6290.86	3294.07	3557.61	9306.08	9528.48	2795.07	2962	9270.14	7267.93
NEFM	P07197	NFM_HUMAN	Neurofilament medium polypeptide OS=Homo sapiens OX=9606 GN=NEFM PE=1 SV=3	4.7	102529	18850.7	50	60.81	17757.7	17308.3	6856.75	6052.07	9401.9	8210.1	11963.2	11766.2	15523.9	12611.2	17752.8	15515.9	8654.27	8190.97	4742.1	4745.09	13608	13117.3	4558.08	4297.71	11745.1	9518.22
GAP43	P17677	NEUM_HUMAN	Neuromodulin OS=Homo sapiens OX=9606 GN=GAP43 PE=1 SV=1	4.45	24916.7	433.443	2	35.71	24.1747	14.8208	32.9921	26.4513	43.7478	27.3045	28.7307	33.9725	52.2503	42.5803							14.4661	15.5736			32.7025	15.0198
GPM6A	P51674	GPM6A_HUMAN	Neuronal membrane glycoprotein M6-a OS=Homo sapiens OX=9606 GN=GPM6A PE=1 SV=2	5.01	31951	746.227	4	15.47	114.832	117.219	240.026	240.368	333.6	274.33	187.951	202.489	183.02	162.916	43.6079	36.6259	59.2623	66.4254	97.5942	100.872	53.9281	68.8652	94.6065	90.7693	205.675	71.2557
GPM6B	Q13491	GPM6B_HUMAN	Neuronal membrane glycoprotein M6-b OS=Homo sapiens OX=9606 GN=GPM6B PE=1 SV=2	5.45	29901.3	1010.87	3	13.21	294.989	226.681	342.238	341.467	351.221	327.807	286.434	371.958	285.873	236.918	89.8715	74.2034	136.064	111.725	149.025	112.422	276.605	573.24	371.905	146.955	306.559	204.202
SLC1A4	P43007	SATT_HUMAN	Neutral amino acid transporter A OS=Homo sapiens OX=9606 GN=SLC1A4 PE=1 SV=1	5.86	56122.4	1035.45	2	5.45	2.74053	2.71726	16.4046	16.3453	21.1028	14.7677	13.1808	2.30391	14.7734	1.99271											10.6329	0
NME1	P15531	NDKA_HUMAN	Nucleoside diphosphate kinase A OS=Homo sapiens OX=9606 GN=NME1 PE=1 SV=1	5.79	17319.8	4485.88	9	57.89	86.0491	86.3606	72.3044	65.4478	102.186	78.43	77.633	71.2967	72.5448	63.2912	101.542	88.1452	104.689	102.769	112.881	92.5261	84.6961	79.3551	112.96	88.9962	77.5543	96.8559
NME2	P22392	NDKB_HUMAN	Nucleoside diphosphate kinase B OS=Homo sapiens OX=9606 GN=NME2 PE=1 SV=1	8.75	17412.1	4791.97	9	59.87	68.686	71.0172	62.4982	56.6212	90.8041	61.0389	57.221	56.828	55.4344	46.3237	140.145	114.164	134.114	144.657	152.28	131.423	122.28	110.119	143.167	116.895	62.6473	130.924
OLA1	Q9NTK5	OLA1_HUMAN	Obg-like ATPase 1 OS=Homo sapiens OX=9606 GN=OLA1 PE=1 SV=2	7.85	44971.7	1220.49	8	36.11	103.864	106.859	93.3484	83.7418	125.582	100.669	114.379	111.638	115.764	98.6248	62.7714	73.6986	52.2625	51.4106	56.5724	70.2013	63.1458	70.043	75.2986	63.7844	105.447	63.9188
OMG	P23515	OMGP_HUMAN	Oligodendrocyte-myelin glycoprotein OS=Homo sapiens OX=9606 GN=OMG PE=1 SV=2	7.87	50064.3	1354.51	7	24.32	168.948	4546.43	667.367	509.376	356.561	272.004	214.714	216.755	3070.74	268.804	94.1534	90.2076	6365.97	5874.82	7630.19	155.074	7259.7	137.622	7063.5	5248.91	1029.17	3992.01
OPALIN	Q96PE5	OPALI_HUMAN	Opalin OS=Homo sapiens OX=9606 GN=OPALIN PE=2 SV=1	5.79	15796.9	4085.3	5	46.1	22.597	21.9972	101.667	89.7462	59.316	42.7334	48.3393	44.3976	50.1539	46.4252	28.0662	30.9247	166.685	180.06	97.4861	100.277	79.4597	83.9711	116.305	103.699	52.7372	98.6934
PPIA	P62937	PPIA_HUMAN	Peptidyl-prolyl cis-trans isomerase A OS=Homo sapiens OX=9606 GN=PPIA PE=1 SV=2	7.85	18240.6	19572.1	11	77.58	995.36	911.594	912.221	819.384	977.316	831.182	813.96	867.276	814.536	610.919	504.082	426.407	371.878	386.463	337.652	324.873	399.561	384.034	489.912	436.294	855.375	406.116
PPIB	P23284	PPIB_HUMAN	Peptidyl-prolyl cis-trans isomerase B OS=Homo sapiens OX=9606 GN=PPIB PE=1 SV=2	10.06	23799.6	820.84	4	21.76	48.1541	43.0368	55.1876	59.4002	54.4978	38.9306	58.6743	60.2713	48.9046	38.1034	32.6531	33.8185	39.8479	40.2388	36.4554	33.9381	39.0707	41.3586	48.4636	43.1236	50.5161	38.8968
PLIN3	O60664	PLIN3_HUMAN	Perilipin-3 OS=Homo sapiens OX=9606 GN=PLIN3 PE=1 SV=3	5.14	47246.1	497.44	4	16.13	81.2117	84.8653	99.343	99.0506	94.6411	76.307	81.6855	73.4938	70.7159	64.7972	36.7731	37.7717	37.5293	33.9689			42.9486	39.3355	44.9253	33.4424	82.6111	38.3369
PRDX1	Q06830	PRDX1_HUMAN	Peroxiredoxin-1 OS=Homo sapiens OX=9606 GN=PRDX1 PE=1 SV=1	8.24	22338.5	16310.8	14	75.38	855.624	847.462	1157.41	1101.56	1322.13	1160.81	980.267	1005.26	759.981	604.268	728.274	682.784	1504.9	1475.32	1177.17	1195.45	932.919	925.51	906.782	785.452	979.478	1031.46
PRDX2	P32119	PRDX2_HUMAN	Peroxiredoxin-2 OS=Homo sapiens OX=9606 GN=PRDX2 PE=1 SV=5	5.58	22063	11420.5	12	76.26	457.957	431.598	385.005	338.967	497.164	420.705	514.993	487.534	433.954	319.398	216.531	254.506	406.043	404.43	420.667	436.166	315.295	353.356	335.132	312.377	428.727	345.45
PRDX4	Q13162	PRDX4_HUMAN	Peroxiredoxin-4 OS=Homo sapiens OX=9606 GN=PRDX4 PE=1 SV=1	5.87	30768	1483.91	7	34.32	26.2032	25.6464	37.7158	33.6485	40.2541	30.5016	28.0043	30.1246	28.9495	27.9777	27.9729	33.4306	49.4758	55.0431	49.6584	50.7649	32.6152	39.2865	36.8456	46.348	30.9026	42.1441
PRDX5	P30044	PRDX5_HUMAN	Peroxiredoxin-5_ mitochondrial OS=Homo sapiens OX=9606 GN=PRDX5 PE=1 SV=4	8.98	22314.6	3782.24	9	55.61	162.357	146.891	144.444	128.879	207.074	171.618	154.176	153.714	154.628	124.065	62.2992	58.15	56.4583	52.8052	30.4048	34.5122	42.3917	53.8814	53.4911	45.7195	154.785	49.0113
PRDX6	P30041	PRDX6_HUMAN	Peroxiredoxin-6 OS=Homo sapiens OX=9606 GN=PRDX6 PE=1 SV=3	5.98	25149.1	15608.3	16	64.29	413.091	542.101	1031.42	985.381	1037.66	813.416	520.181	532.752	369.874	260.176	272.379	252.584	332.077	352.259	345.973	341.352	277.212	279.342	530.074	366.554	650.605	334.98
SLC25A3	Q00325	MPCP_HUMAN	Phosphate carrier protein_ mitochondrial OS=Homo sapiens OX=9606 GN=SLC25A3 PE=1 SV=2	9.77	40551.2	678.072	8	24.59	162.134	169.226	140.71	140.63	190.57	146.766	170.269	173.193	157.795	125.664	185.411	171.384	201.119	211.631	148.959	137.407	202.073	210.406	137.957	125.563	157.696	173.191
PEBP1	P30086	PEBP1_HUMAN	Phosphatidylethanolamine-binding protein 1 OS=Homo sapiens OX=9606 GN=PEBP1 PE=1 SV=3	7.41	21170.9	47672.1	12	85.56	1151.57	1306.08	1564.57	1479.54	1580.22	1537.26	1390.29	1473.58	1281.07	1111.44	531.324	524.115	623.503	716.001	645.418	713.903	637.425	659.329	621.959	756.37	1387.56	642.935
PIP4K2A	P48426	PI42A_HUMAN	Phosphatidylinositol 5-phosphate 4-kinase type-2 alpha OS=Homo sapiens OX=9606 GN=PIP4K2A PE=1 SV=2	6.57	46452.8	820.668	10	27.34	212.884	200.053	221.44	226.322	207.473	152.969	253.378	238.106	195.795	181.568	131.709	150.86	137.57	136.805	125.042	119.761	126.067	145.593	178.87	187.945	208.999	144.022
PGM1	P36871	PGM1_HUMAN	Phosphoglucomutase-1 OS=Homo sapiens OX=9606 GN=PGM1 PE=1 SV=3	6.33	61734.4	555.508	5	20.46	93.1548	88.4267	122.516	116.964	161.198	108.93	82.8372	84.9019	54.3114	49.8232											96.3064	0
PGK1	P00558	PGK1_HUMAN	Phosphoglycerate kinase 1 OS=Homo sapiens OX=9606 GN=PGK1 PE=1 SV=3	8.16	45014	7356.51	23	79.38	1080.06	932.667	905.06	828.57	1138.27	956.39	1003.84	947.773	967.847	731.973	123.417	125.326	109.654	105.62	127.424	122.767	123.087	129.126	193.046	183.965	949.246	134.343
PGK2	P07205	PGK2_HUMAN	Phosphoglycerate kinase 2 OS=Homo sapiens OX=9606 GN=PGK2 PE=1 SV=3	8.76	45195.4	1272.35	3	16.07	22.9385	20.6941	22.0717	19.6848	27.0142	27.6028	21.7942	24.4253	22.4984	25.2959	15.65	25.2179			9.18813		14.7868		15.371	17.4132	23.402	16.2712
PGAM1	P18669	PGAM1_HUMAN	Phosphoglycerate mutase 1 OS=Homo sapiens OX=9606 GN=PGAM1 PE=1 SV=2	6.82	28918	11282.5	12	61.81	600.576	533.639	604.189	518.286	666.084	575.357	611.414	557.794	558.643	426.903	81.1689	40.626	56.6231	65.4173	52.8575	54.3555	71.9562	71.2429	70.6706	68.7238	565.288	63.3642
PGAM2	P15259	PGAM2_HUMAN	Phosphoglycerate mutase 2 OS=Homo sapiens OX=9606 GN=PGAM2 PE=1 SV=3	9.34	28937.3	6150.93	10	48.62	73.3384	62.1344	138.382	106.684	87.5381	75.3269	83.566	87.0027	55.6872	55.2309	10.0521	9.92136	8.38788	9.39804	10.6593	12.1096	14.8279	11.347	13.0125	10.9778	82.4891	11.0693
PSAT1	Q9Y617	SERC_HUMAN	Phosphoserine aminotransferase OS=Homo sapiens OX=9606 GN=PSAT1 PE=1 SV=2	7.6	40821.9	3060.23	15	48.92	593.819	707.602	993.855	904.837	1050.11	864.034	902.661	889.335	757.548	648.482	759.257	772.478	1219.57	1376.03	1124.65	1644.25	1079.62	1079.73	1090.64	1108.25	831.229	1125.45
PITHD1	Q9GZP4	PITH1_HUMAN	PITH domain-containing protein 1 OS=Homo sapiens OX=9606 GN=PITHD1 PE=1 SV=1	5.39	24406	601.976	2	18.01	34.7492	43.7124	39.3652	28.3986	54.1803	44.4949	39.9809	44.3838	28.2689	35.4043		13.9867									39.2939	13.9867
PLLP	Q9Y342	PLLP_HUMAN	Plasmolipin OS=Homo sapiens OX=9606 GN=PLLP PE=1 SV=1	9.55	20100.7	7895.88	3	25.27	283.35	289.471	554.646	534.696	450.926	408.528	448.318	507.43	425.853	329.166	620.422	616.594	1650.98	1799.73	1360.8	1397.59	1216.94	1223.35	1393.36	1494.4	423.239	1277.42
PAFAH1B1	P43034	LIS1_HUMAN	Platelet-activating factor acetylhydrolase IB subunit alpha OS=Homo sapiens OX=9606 GN=PAFAH1B1 PE=1 SV=2	7.04	47208.3	642.836	10	42.2	168.025	158	130.283	135.37	172.141	138.095	136.926	152.513	142.451	119.755	157.199	155.712	102.306	92.5706	102.829	88.9305	138.536	127.142	94.223	82.9121	145.356	114.236
PAFAH1B2	P68402	PA1B2_HUMAN	Platelet-activating factor acetylhydrolase IB subunit beta OS=Homo sapiens OX=9606 GN=PAFAH1B2 PE=1 SV=1	5.52	25740.4	980.867	2	12.23	113.714	106.549	101.403	89.9814	124.034	94.2343	105.156	109.087	112.971	90.7998		18.9231	23.7789	20.2216	23.5404	24.9888	28.7626	22.9672	41.7768	34.4161	104.793	26.5973
PLEKHB1	Q9UF11	PKHB1_HUMAN	Pleckstrin homology domain-containing family B member 1 OS=Homo sapiens OX=9606 GN=PLEKHB1 PE=1 SV=1	7.15	27585.2	4073.65	9	57.61	186.562	174.146	207.704	169.824	240.377	137.657	174.945	177.543	253.119	229.68	320.657	333.243	492.205	552.883	398.226	400.74	359.811	380.771	817.97	768.92	195.156	482.543
PLEC	Q15149	PLEC_HUMAN	Plectin OS=Homo sapiens OX=9606 GN=PLEC PE=1 SV=3	5.64	533787	1020.24	123	38.94	6324.25	6060.67	4853.93	4572.44	6498.43	5412.94	5409.31	4953.36	4761.25	4343.52	9948.27	9007.07	9269.43	9502.74	10553.5	10927	8191.17	8181.65	14395.3	11089.9	5319.01	10106.6
PCBP1	Q15365	PCBP1_HUMAN	Poly(rC)-binding protein 1 OS=Homo sapiens OX=9606 GN=PCBP1 PE=1 SV=2	6.75	38011.1	831.263	6	34.83	90.3284	84.8978	101.061	92.6138	122.143	86.1969	93.0846	95.469	85.4406	70.3281	63.7438	60.7773	58.9645	50.8099	41.0628	48.1237	61.2574	60.7757	43.8584	35.3494	92.1563	52.4723
PCBP2	Q15366	PCBP2_HUMAN	Poly(rC)-binding protein 2 OS=Homo sapiens OX=9606 GN=PCBP2 PE=1 SV=1	6.38	38979.4	726.204	3	12.88	72.0593	73.2143	75.1983	73.3667	92.3646	71.2451	77.3709	77.2684	64.4602	58.1402	58.0168	54.564	51.234	49.5779	32.1322	29.6828	71.3868	55.6042	31.4297	46.7816	73.4688	48.041
KCNA2	P16389	KCNA2_HUMAN	Potassium voltage-gated channel subfamily A member 2 OS=Homo sapiens OX=9606 GN=KCNA2 PE=1 SV=2	4.59	57173.1	511.863	5	18.64	106.85	101.251	61.8666	55.8762	98.3112	80.1626	79.5854	77.6872	74.1607	61.93	183.41	147.97	143.469	155.068	208.138	215.224	140.647	138.205	216.515	181.139	79.7681	172.979
ATP4A	P20648	ATP4A_HUMAN	Potassium-transporting ATPase alpha chain 1 OS=Homo sapiens OX=9606 GN=ATP4A PE=2 SV=5	5.46	115830	1135.86	10	18.07	586.07	579.389	378.677	380.784	1009.28	463.462	473.98	501.737	484.247	1058.9	409.499	568.103	461.31	381.278	439.947	408.102	406.117	622.058	344.405	307.247	591.652	434.807
ATP12A	P54707	AT12A_HUMAN	Potassium-transporting ATPase alpha chain 2 OS=Homo sapiens OX=9606 GN=ATP12A PE=1 SV=3	6.13	116366	1010.65	12	15.69	410.604	415.973	284.015	274.16	386.694	358.582	375.45	354.595	318.399	379.597	481.856	395.482	1404.45	374.752	439.321	432.267	410.719	412.528	408.883	365.842	355.807	512.61
POTEE	Q6S8J3	POTEE_HUMAN	POTE ankyrin domain family member E OS=Homo sapiens OX=9606 GN=POTEE PE=2 SV=3	5.8	122961	11263.2	15	26.14	239.044	201.601	252.008	446.462	1048.58	294.826	294.657	251.709	225.637	1259.42	367.983	963.157	538.177	434.05	217.985	281.661	407.309	669.092	290.202	367.815	451.394	453.743
POTEF	A5A3E0	POTEF_HUMAN	POTE ankyrin domain family member F OS=Homo sapiens OX=9606 GN=POTEF PE=1 SV=2	5.8	123099	8358.46	13	22.14	272.835	231.371	288.552	497.313	1148.42	333.251	333.663	287.058	257.287	1372.77	229.93	628.427	357.406	294.696	135.106	159.15	265.918	444.159	200.471	233.398	502.251	294.866
ARL6IP5	O75915	PRAF3_HUMAN	PRA1 family protein 3 OS=Homo sapiens OX=9606 GN=ARL6IP5 PE=1 SV=1	10.27	21614.8	533.424	2	15.96	74.4868	62.8585	84.0601	67.1277	91.3052	70.5919	71.0736	64.7858	58.2253	54.6106	93.6734	86.8207	64.1943	66.6542	65.7921	66.7311	99.3437	91.4336	41.8493	64.336	69.9125	74.0829
LMNA	P02545	LMNA_HUMAN	Prelamin-A/C OS=Homo sapiens OX=9606 GN=LMNA PE=1 SV=1	6.61	74424.7	963.615	13	30.27	200.469	188.357	360.235	328.709	299.021	218.06	299.616	225.663	176.408	168.356	153.601	145.618	99.1468	112.154	69.187	119.42	75.9418	92.4831	62.8185	70.7576	246.489	100.113
PGAM4	Q8N0Y7	PGAM4_HUMAN	Probable phosphoglycerate mutase 4 OS=Homo sapiens OX=9606 GN=PGAM4 PE=3 SV=1	6.23	28948	6256.05	5	30.71	108.184	114.089	108.359	97.1028	122.367	125.892	109.592	116.19	91.3787	75.5655	64.9136	52.6045	53.6799	69.6887	73.7201	56.5906	58.6224	64.4169	64.9145	77.6634	106.872	63.6815
PFN1	P07737	PROF1_HUMAN	Profilin-1 OS=Homo sapiens OX=9606 GN=PFN1 PE=1 SV=2	8.45	15225.3	5978.17	9	92.86	187.36	175.129	198.711	176.177	243.881	192.343	178.792	181.381	170.298	143.585	46.9926	43.4603	33.5731	45.1237	33.3657	32.7092	37.1783	39.6367	60.0877	51.3414	184.766	42.3469
PFN2	P35080	PROF2_HUMAN	Profilin-2 OS=Homo sapiens OX=9606 GN=PFN2 PE=1 SV=3	6.79	15388.4	1653.4	4	36.43	80.7184	75.0159	62.348	62.4479	97.8294	73.8708	68.2842	71.0522	63.9221	52.5418	24.284	23.1657	25.3361	26.3784	23.9036	19.4171	21.032	24.8901	24.3476	21.6633	70.8031	23.4418
PHB	P35232	PHB_HUMAN	Prohibitin OS=Homo sapiens OX=9606 GN=PHB PE=1 SV=1	5.44	29861.1	696.435	5	30.88	60.4909	60.5651	62.3737	59.0583	84.0332	62.5272	66.2296	64.7249	60.4474	51.9262	73.8324	60.7934	84.7432	66.7044	67.7478	62.9205	73.8986	75.7367	55.0819	48.3328	63.2377	66.9792
PTGDS	P41222	PTGDS_HUMAN	Prostaglandin-H2 D-isomerase OS=Homo sapiens OX=9606 GN=PTGDS PE=1 SV=1	7.83	21257	4585.44	7	46.84	133.589	127.44	238.655	214.808	215.253	156.389	201.058	217.112	166.647	133.302	40.5252	41.2069	71.19	68.4711	46.8206	46.1128	44.223	42.6435	86.6987	54.7033	180.425	54.2595
PDIA3	P30101	PDIA3_HUMAN	Protein disulfide-isomerase A3 OS=Homo sapiens OX=9606 GN=PDIA3 PE=1 SV=4	5.96	57181.6	1104.13	15	43.56	870.578	578.907	499.784	469.302	610.909	539.071	494.952	508.957	353.003	356.134	656.719	525.321	505.276	481.19	340.353	297.145	571.064	565.807	259.569	216.333	528.16	441.878
P4HB	P07237	PDIA1_HUMAN	Protein disulfide-isomerase OS=Homo sapiens OX=9606 GN=P4HB PE=1 SV=3	4.57	57515.6	504.174	4	17.13	140.6	67.3182	72.1688	66.8332	94.6911	65.1343	73.211	73.7417	49.6262	53.8562	264.376	111.756	77.1204	72.5012	149.816	147.817	140.064	86.5881	69.4836	118.514	75.7181	123.804
FAM49A	Q9H0Q0	FA49A_HUMAN	Protein FAM49A OS=Homo sapiens OX=9606 GN=FAM49A PE=2 SV=1	5.65	37712.1	495.221	3	11.76	53.3113	52.584	46.9953	46.2937	52.7481	37.5457	37.4745	38.0583	43.0051	35.7559	68.6762	58.7434	99.3511	65.6382	98.037	133.067	66.16	57.97	117.344	99.268	44.3772	86.4256
FAM49B	Q9NUQ9	FA49B_HUMAN	Protein FAM49B OS=Homo sapiens OX=9606 GN=FAM49B PE=1 SV=1	5.7	37033.2	1272.22	10	57.41	172.76	155.65	145.265	158.611	224.484	170.575	139.796	140.88	151.416	122.046	64.8511	72.8885	83.0971	80.7947	101.583	102.001	81.4765	83.6891	65.5156	104.278	158.148	84.0174
PRKCA	P17252	KPCA_HUMAN	Protein kinase C alpha type OS=Homo sapiens OX=9606 GN=PRKCA PE=1 SV=4	6.65	77890.6	827.62	12	37.8	91.1328	81.599	118.161	104.026	165.12	125.671	109.761	106.752	102.337	80.5755	108.955	82.9239	114.925	107.216	109.143	123.614	122.67	111.044	97.975	91.4897	108.513	106.996
PACSIN1	Q9BY11	PACN1_HUMAN	Protein kinase C and casein kinase substrate in neurons protein 1 OS=Homo sapiens OX=9606 GN=PACSIN1 PE=1 SV=1	4.97	51307.9	765.977	5	13.96	110.131	109.819	95.2171	90.3492	122.289	92.3654	91.826	89.2133	113.778	82.894	72.5499	74.7818	41.2842	40.3275	59.2847	70.258	68.1659	82.7141	78.4741	68.199	99.7882	65.6039
PRKCB	P05771	KPCB_HUMAN	Protein kinase C beta type OS=Homo sapiens OX=9606 GN=PRKCB PE=1 SV=4	6.6	78009.7	676.402	14	32.19	107.62	104.021	120.127	101.323	177.058	130.758	119.64	118.946	115.069	103.624	177.715	153.699	214.313	216.478	207.052	198.108	220.426	201.918	198.321	181.451	119.819	196.948
PRKCG	P05129	KPCG_HUMAN	Protein kinase C gamma type OS=Homo sapiens OX=9606 GN=PRKCG PE=1 SV=3	7.19	79702.6	652.579	15	42.75	89.3345	70.164	100.172	127.729	272.296	146.336	123.088	119.845	121.071	220.739	137.343	270.498	227.283	242.95	207.165	195.558	216	277.183	173.925	176.405	139.077	212.431
NDRG1	Q92597	NDRG1_HUMAN	Protein NDRG1 OS=Homo sapiens OX=9606 GN=NDRG1 PE=1 SV=1	5.43	43291.8	2971.28	11	51.02	199.495	189.724	222.582	211.197	277.781	184.002	200.558	187.929	182.721	151.041	183.524	170.533	222.773	269.959	192.047	181.539	165.151	164.132	189.088	190.817	200.703	192.956
NDRG2	Q9UN36	NDRG2_HUMAN	Protein NDRG2 OS=Homo sapiens OX=9606 GN=NDRG2 PE=1 SV=2	4.92	41140.4	1746.94	10	48.25	208.391	196.988	329.845	295.956	352.596	245.577	228.499	212.295	167.135	129.753	55.039	54.508	80.5864	88.5042	56.6016	54.2555	57.428	66.9109	56.5165	51.4281	236.704	62.1778
PPP1R14A	Q96A00	PP14A_HUMAN	Protein phosphatase 1 regulatory subunit 14A OS=Homo sapiens OX=9606 GN=PPP1R14A PE=1 SV=1	9.98	16750	1329.56	3	31.29	33.6062	44.6788	53.9931	53.198	68.798	42.7237	57.7848	57.9024	65.2043	63.6819	31.8194	22.4445	38.3492	24.6393	32.2459	36.2533	52.9596	24.3074	40.9278	40.924	54.1571	34.4871
RUFY3	Q7L099	RUFY3_HUMAN	Protein RUFY3 OS=Homo sapiens OX=9606 GN=RUFY3 PE=1 SV=1	5.2	53250.2	790.571	10	29.21	209.951	183.083	134.579	139.47	199.378	144.803	162.547	166.88	155.705	134.287	244.048	224.844	198.641	185.862	152.624	150.395	220.032	209.098	142.537	116.16	163.068	184.424
S100A1	P23297	S10A1_HUMAN	Protein S100-A1 OS=Homo sapiens OX=9606 GN=S100A1 PE=1 SV=2	4.19	10602.9	10102.4	3	26.6	110.422	70.7928	101.937	84.7249	136.348	91.226	87.6487	112.618	107.637	123.572	11.8153	9.80269	26.7208	11.5207	8.53447	6.39299	17.7548	9.95759	41.5677	32.8589	102.693	17.6926
S100B	P04271	S100B_HUMAN	Protein S100-B OS=Homo sapiens OX=9606 GN=S100B PE=1 SV=2	4.33	10827.1	20064.6	3	46.74	584.46	446.568	646.052	651.1	951.326	760.957	607.366	891.349	259.027	408.25	115.692	93.3284	103.539	178.951	113.84	111.36	126.35	147.105	107.083	158.571	620.645	125.582
SHISA4	Q96DD7	SHSA4_HUMAN	Protein shisa-4 OS=Homo sapiens OX=9606 GN=SHISA4 PE=2 SV=3	7.8	22263.5	1539.93	2	19.8	13.4013	15.3126	22.273	21.16	20.9612	19.5998	27.8715	17.1069	25.328	21.4317	20.7603	26.6059	48.877	53.4333	55.231	51.2474	30.4108	30.743	82.2657	94.8148	20.4446	49.4389
PARK7	Q99497	PARK7_HUMAN	Protein/nucleic acid deglycase DJ-1 OS=Homo sapiens OX=9606 GN=PARK7 PE=1 SV=2	6.4	20062.2	9123.27	11	69.31	279.532	259.165	385.164	338.479	449.616	352.457	332.416	319.59	274.056	206.369	40.5998	42.0588	41.9318	42.9848	35.577	30.7455	42.115	41.8783	47.0938	44.824	319.684	40.9809
PADI2	Q9Y2J8	PADI2_HUMAN	Protein-arginine deiminase type-2 OS=Homo sapiens OX=9606 GN=PADI2 PE=1 SV=2	5.27	76305.4	3088.42	28	64.06	762.263	774.248	581.184	621.134	944	664.421	663.445	657.12	744.732	629.696	996.371	902.432	690.247	726.656	769.697	693.407	694.082	687.246	1002.76	903.34	704.224	806.624
PCMT1	P22061	PIMT_HUMAN	Protein-L-isoaspartate(D-aspartate) O-methyltransferase OS=Homo sapiens OX=9606 GN=PCMT1 PE=1 SV=4	6.85	24807.5	3723.34	10	69.6	148.481	156.559	139.007	114.126	192.175	130.848	139.77	143.664	115.091	98.3682	53.7781	45.802	37.1998	42.1651	42.2844	39.809	43.9347	50.2598	60.3751	48.9889	137.809	46.4597
NPEPPS	P55786	PSA_HUMAN	Puromycin-sensitive aminopeptidase OS=Homo sapiens OX=9606 GN=NPEPPS PE=1 SV=2	5.37	103961	940.614	17	30.69	836.969	763.265	811.98	713.068	869.455	764.808	731.777	772.787	794.104	825.233	1120.48	1072.52	1291.13	1604.02	1334.1	1840.93	1116.29	977.269	1280.35	1365.04	788.345	1300.21
NPEPPSL1	A6NEC2	PSAL_HUMAN	Puromycin-sensitive aminopeptidase-like protein OS=Homo sapiens OX=9606 GN=NPEPPSL1 PE=2 SV=3	5	54260.6	610.395	6	23.64	48.5824	49.5713	53.3984	52.55	101.269	75.7829	74.4678	73.0808	44.3724	41.1201	62.0019	36.7297	75.7695	89.2186	193.026	193.6	131.296	150.266	78.7113	62.8642	61.4195	107.348
POTEKP	Q9BYX7	ACTBM_HUMAN	Putative beta-actin-like protein 3 OS=Homo sapiens OX=9606 GN=POTEKP PE=5 SV=1	5.92	42358.5	6888.05	6	33.6	31.5011	32.0676	31.3366	29.6683	29.5666	31.4778	30.5871	31.1882	28.2413	23.756											29.9391	0
HSP90AA4P	Q58FG1	HS904_HUMAN	Putative heat shock protein HSP 90-alpha A4 OS=Homo sapiens OX=9606 GN=HSP90AA4P PE=5 SV=1	4.89	47826	1463.87	5	19.62	27.4906	18.2988	18.2127	21.8265	20.2695	8.54073	18.8324	18.9834	15.4383	14.7361	5.82826	17.8182				15.2184	19.4949	20.1368		7.46846	18.2629	14.3275
HSP90AA5P	Q58FG0	HS905_HUMAN	Putative heat shock protein HSP 90-alpha A5 OS=Homo sapiens OX=9606 GN=HSP90AA5P PE=2 SV=1	6.15	38966.2	694.888	8	25.45	20.2305	17.8461	28.5848	24.5531	34.2353	30.6876	23.6444	23.7746	26.1755	21.3073	9.88951	9.42934	12.3472	15.3134	15.1225	2.6076	17.6583	17.8239	19.8478	9.15732	25.1039	12.9197
HSP90AB2P	Q58FF8	H90B2_HUMAN	Putative heat shock protein HSP 90-beta 2 OS=Homo sapiens OX=9606 GN=HSP90AB2P PE=1 SV=2	4.59	44520.1	935.365	10	30.71	112.242	116.428	104.736	109.617	130.374	112.473	126.092	125.582	99.8573	82.8167	78.9825	71.1725	68.0777	71.6143	42.485	40.8458	80.3359	80.0189	64.8875	58.005	112.022	65.6425
HSP90AB4P	Q58FF6	H90B4_HUMAN	Putative heat shock protein HSP 90-beta 4 OS=Homo sapiens OX=9606 GN=HSP90AB4P PE=5 SV=1	4.45	58891.8	1133.56	7	17.43	98.5257	89.0789	87.7174	78.8389	130.74	116.379	102.291	87.0591	69.4871	137.584	51.6122	48.8535	24.2334	20.3992	17.2713	16.6959	39.1055	32.918	22.4321	29.3599	99.7701	30.2881
HSP90AB3P	Q58FF7	H90B3_HUMAN	Putative heat shock protein HSP 90-beta-3 OS=Homo sapiens OX=9606 GN=HSP90AB3P PE=5 SV=1	4.51	68667.1	1534.54	12	17.92	77.4758	78.1992	70.1207	73.5048	96.8045	75.8782	83.9317	82.8003	55.3542	51.083											74.5152	0
TUBA4B	Q9H853	TBA4B_HUMAN	Putative tubulin-like protein alpha-4B OS=Homo sapiens OX=9606 GN=TUBA4B PE=5 SV=2	7.77	27836.4	6267.57	3	23.65	8.167	1.63464	0.381898	0.923423	16.2333	1.12502	7.18736	0.738064	5.66928	8.34573	9.52296	14.3229	1.57682	7.95317	1.4406	10.9409	1.50415	2.38132	0.641277	0.931361	5.04057	5.12155
PDXK	O00764	PDXK_HUMAN	Pyridoxal kinase OS=Homo sapiens OX=9606 GN=PDXK PE=1 SV=1	5.72	35330.5	1565.09	5	49.36	103.264	102.358	107.126	98.1534	133.878	110.214	116.593	119.568	119.415	99.7374	73.8563	71.2898	36.658	38.5237	22.0165	20.1747	62.1637	66.606	54.523		111.031	49.5346
PDHB	P11177	ODPB_HUMAN	Pyruvate dehydrogenase E1 component subunit beta_ mitochondrial OS=Homo sapiens OX=9606 GN=PDHB PE=1 SV=3	6.23	39575.7	802.256	5	17.27	112.344	105.471	83.3941	76.4957	112.142	83.8422	83.9052	83.3065	96.332	73.6733	96.4207	79.5633	98.0632	76.9993	77.1092	62.2063	85.2237	80.4495	62.4956	53.603	91.0906	77.2134
PKLR	P30613	KPYR_HUMAN	Pyruvate kinase PKLR OS=Homo sapiens OX=9606 GN=PKLR PE=1 SV=2	7.64	62229.5	1017.01	5	7.84	345.342	339.671	277.106	258.469	375.871	307.132	314.061	313.721	300.682	264.95	457.297	395.318	369.412	354.313	435.94	413.103	363.989	352.494	501.09	444.27	309.701	408.723
PKM	P14618	KPYM_HUMAN	Pyruvate kinase PKM OS=Homo sapiens OX=9606 GN=PKM PE=1 SV=4	7.76	58507.3	18574.9	29	67.04	4272.88	3938.86	3792.43	3482.41	4579.01	4414.02	4288.42	4178.45	3982.29	3301.19	2362.8	2261.92	1325.12	1315.89	1414.87	1425.21	1643.8	1635.59	1583.84	1447.56	4023	1641.66
GDI1	P31150	GDIA_HUMAN	Rab GDP dissociation inhibitor alpha OS=Homo sapiens OX=9606 GN=GDI1 PE=1 SV=2	4.81	51210.1	15063.4	27	87.47	2939.31	2584.04	1694.27	1583.01	2208.41	2025.94	2461.39	2426.81	2624.76	2175.18	3543.4	2917.75	2401.34	2344.91	3232.2	3089.62	2949.42	2762.68	4082.7	3757.75	2272.31	3108.18
GDI2	P50395	GDIB_HUMAN	Rab GDP dissociation inhibitor beta OS=Homo sapiens OX=9606 GN=GDI2 PE=1 SV=2	6.08	51119.6	6640.36	31	88.09	294.165	291.119	306.561	301.267	370.424	277.633	278.996	266.472	281.67	231.481	168.245	172.672	147.447	129.557	150.996	148.335	187.214	180.749	230.191	196.901	289.979	171.231
RDX	P35241	RADI_HUMAN	Radixin OS=Homo sapiens OX=9606 GN=RDX PE=1 SV=1	5.99	68678.1	1908.94	23	44.94	172.311	177.739	257.902	298.414	294.748	233.135	176.735	223.57	232.436	155.172	243.625	223.121	420.551	421.851	359.449	357.018	267.799	229.838	314.221	289.067	222.216	312.654
RAC1	P63000	RAC1_HUMAN	Ras-related C3 botulinum toxin substrate 1 OS=Homo sapiens OX=9606 GN=RAC1 PE=1 SV=1	8.58	21849.3	7926.44	6	39.58	242.254	255.114	283.075	259.108	335.181	285.883	282.082	255.663	286.636	241.813	306.773	279.399	354.872	383.222	357.997	336.445	316.07	309.889	391.596	348.555	272.681	338.482
RAB10	P61026	RAB10_HUMAN	Ras-related protein Rab-10 OS=Homo sapiens OX=9606 GN=RAB10 PE=1 SV=1	8.58	22769.1	4313.15	12	64	83.2648	76.3027	82.1549	69.675	97.6692	77.2184	84.0232	80.977	83.4071	72.0145	101.116	95.5454	106.617	109.815	119.044	121.452	111.524	109.842	142.695	141.658	80.6707	115.931
RAB12	Q6IQ22	RAB12_HUMAN	Ras-related protein Rab-12 OS=Homo sapiens OX=9606 GN=RAB12 PE=1 SV=3	8.51	27590.6	1182.69	2	11.89						166.442	118.717	170.932	162.279	195.053		48.7565	169.958		223.18	144.346			67.3909	78.2537	162.685	121.981
RAB13	P51153	RAB13_HUMAN	Ras-related protein Rab-13 OS=Homo sapiens OX=9606 GN=RAB13 PE=1 SV=1	9.72	23002.3	709.471	2	12.81	8.88682	9.1172	8.44346	8.3753	13.126	8.59662	8.37286	9.91024	10.306	9.60087	12.5784	11.5039	14.1299	16.1439	24.1312	16.7827	14.8974	12.2652	23.7184	19.7581	9.47354	16.5909
RAB14	P61106	RAB14_HUMAN	Ras-related protein Rab-14 OS=Homo sapiens OX=9606 GN=RAB14 PE=1 SV=4	5.82	24125.1	2158	10	71.16	190.527	62.208	82.7949	152.402	202.242	113.743	171.013	120.636	64.623	163.477	66.427	86.993	101.75	280.836	142.119	201.333	53.0359	184.306	276.125	177.513	132.367	157.044
RAB15	P59190	RAB15_HUMAN	Ras-related protein Rab-15 OS=Homo sapiens OX=9606 GN=RAB15 PE=1 SV=1	5.4	24675.8	1378.53	5	49.53	96.9559	169.151	55.2898	93.9519	106.769	142.96	50.2742	69.9836	187.999	88.5551	156.585	143.933	115.12	111.977	70.8888	72.7618	98.2391	91.2331	74.2338	67.7845	106.189	100.276
RAB1A	P62820	RAB1A_HUMAN	Ras-related protein Rab-1A OS=Homo sapiens OX=9606 GN=RAB1A PE=1 SV=3	5.86	22905.9	2508	6	39.51	61.0481	56.8889	64.3678	53.4682	69.399	50.5651	63.4265	59.9423	62.0035	45.8224	37.4887	40.2741	47.3441	51.1722	33.9159	36.8765	46.3275	51.5723	45.7226	48.3524	58.6932	43.9046
RAB1B	Q9H0U4	RAB1B_HUMAN	Ras-related protein Rab-1B OS=Homo sapiens OX=9606 GN=RAB1B PE=1 SV=1	5.4	22342.3	2593.2	10	63.68	50.3983	44.2181	47.7526	44.0836	55.5027	43.7486	46.4915	50.5428	46.1254	35.8157	52.2639	50.3831	57.6273	55.0194	56.5507	55.4659	82.6844	82.7235	75.8408	66.2485	46.4679	63.4808
RAB2A	P61019	RAB2A_HUMAN	Ras-related protein Rab-2A OS=Homo sapiens OX=9606 GN=RAB2A PE=1 SV=1	6.11	23716.7	852.583	6	48.58	73.6525	79.0323	76.3991	75.7671	83.5104	74.0309	64.5712	75.0423	73.3438	57.0604	67.1312	58.6593	68.0434	76.9718	72.0879	72.6045	67.9728	66.4557	85.3172	70.986	73.241	70.623
RAB35	Q15286	RAB35_HUMAN	Ras-related protein Rab-35 OS=Homo sapiens OX=9606 GN=RAB35 PE=1 SV=1	8.39	23310.4	1519.41	2	17.91	23.2052	15.4341	14.9216	15.1285	19.6554	24.6476	14.3031	26.1223	20.3774	17.7487	24.8092	28.1383	30.305	32.1827	37.2794	34.3997	22.4739	30.6615	29.3098	30.2012	19.1544	29.9761
RAB39A	Q14964	RB39A_HUMAN	Ras-related protein Rab-39A OS=Homo sapiens OX=9606 GN=RAB39A PE=1 SV=2	7.59	25405.9	1114.63	2	9.22	86.8015	66.4017	144.353	143.359	275.791	225.447	445.995	246.551	70.0416	106.283	80.87	79.6258	106.636	110.491	252.805	260.215	212.679	249.983	111.494	92.1036	181.102	155.69
RAB3A	P20336	RAB3A_HUMAN	Ras-related protein Rab-3A OS=Homo sapiens OX=9606 GN=RAB3A PE=1 SV=1	4.66	25212.1	1012.07	2	26.36	26.9582	29.7882	19.2174		43.5228	18.4931	20.6322	19.3007	22.8621	21.8485	14.7112	11.6464						12.8591		12.9776	24.7359	13.0486
RAB3B	P20337	RAB3B_HUMAN	Ras-related protein Rab-3B OS=Homo sapiens OX=9606 GN=RAB3B PE=1 SV=2	4.65	24986.1	1177.84	4	38.36	22.9199	25.8652	19.2952	13.977	23.6063	15.2005	52.4631	47.1074	14.277		29.2284	26.6505		17.5072			29.5746	44.4882		17.2513	26.0791	27.45
RAB3C	Q96E17	RAB3C_HUMAN	Ras-related protein Rab-3C OS=Homo sapiens OX=9606 GN=RAB3C PE=1 SV=1	4.9	26180.4	1143.45	2	14.54	11.8684	14.1262	24.1477		22.6329	16.8827	16.7058	17.7769	5.65012	11.9368		12.61		15.3039			6.16206	14.6536			15.7475	12.1824
RAB3D	O95716	RAB3D_HUMAN	Ras-related protein Rab-3D OS=Homo sapiens OX=9606 GN=RAB3D PE=1 SV=1	4.57	24495.3	1066.71	3	29.22	4.58843	4.41143	3.88588	3.78202	4.84907	6.20763	3.71472	4.07759	4.15624	3.7955	4.02726	9.89241	16.5546	15.7033	14.7044	22.2196	5.03901	11.493		15.8031	4.34685	12.8263
RAB43	Q86YS6	RAB43_HUMAN	Ras-related protein Rab-43 OS=Homo sapiens OX=9606 GN=RAB43 PE=1 SV=1	5.31	23567.5	1012.07	2	18.87	19.9408	22.178	20.549		33.1803		22.0794	25.2914	17.3063	14.2728	18.9872	18.3284	24.5133	22.4706	29.6119	21.5329	20.2055	17.9785	43.3069	35.8112	21.8498	25.2747
RAB4A	P20338	RAB4A_HUMAN	Ras-related protein Rab-4A OS=Homo sapiens OX=9606 GN=RAB4A PE=1 SV=3	5.74	24674.8	1213.24	3	24.77	54.3534	74.5488	42.5493	67.8673	52.3063	61.4723	58.2267	70.3654	51.9576	64.2355	59.5773	116.689	69.6297	133.06	77.052	167.964	73.0881	139.762	102.919	182.183	59.7883	112.193
RAB4B	P61018	RAB4B_HUMAN	Ras-related protein Rab-4B OS=Homo sapiens OX=9606 GN=RAB4B PE=1 SV=1	5.72	23871.9	1258.63	3	33.33	34.1412	34.3641	24.6805	31.4494	38.522	29.2631	27.2776	33.7578	29.128	32.3565	27.638	40.5766	26.0697	45.1082	27.8764	53.3384	26.8668	39.6716	30.3867	59.2102	31.494	37.6743
RAB5A	P20339	RAB5A_HUMAN	Ras-related protein Rab-5A OS=Homo sapiens OX=9606 GN=RAB5A PE=1 SV=2	8.25	23886.8	942.482	5	33.49	36.4757	39.1368	38.4418	35.4805	42.9875	30.9889	34.4797	34.2895	38.9065	30.3102	28.3268	26.247	24.7134	35.4583	34.7138	36.4531	27.7489	28.2392	35.7458	45.6037	36.1497	32.325
RAB5B	P61020	RAB5B_HUMAN	Ras-related protein Rab-5B OS=Homo sapiens OX=9606 GN=RAB5B PE=1 SV=1	8.24	23935	2607.93	8	53.95	66.48	57.8194	62.9402	57.1734	75.5126	57.1607	62.296	60.2045	62.7433	44.4437	45.462	44.1468	52.324	58.2846	74.5139	63.0188	61.7836	54.2491	74.1303	78.2508	60.6774	60.6164
RAB5C	P51148	RAB5C_HUMAN	Ras-related protein Rab-5C OS=Homo sapiens OX=9606 GN=RAB5C PE=1 SV=2	8.58	23710.7	1470.21	6	36.11	55.7715	57.9632	72.485	60.6755	77.2475	57.219	53.6609	53.0175	53.1331	55.4408	37.7737	30.6214	59.6479	53.7896	68.9625	76.8319	53.886	54.4554	68.9045	76.3557	59.6614	58.1229
RAB6A	P20340	RAB6A_HUMAN	Ras-related protein Rab-6A OS=Homo sapiens OX=9606 GN=RAB6A PE=1 SV=3	5.23	23706.9	1381.51	7	38.46	49.1238	50.8496	54.6384	51.5964	72.0001	51.6256	48.1065	51.6477	44.1065	37.6163	33.7708	29.7116	30.4454	36.8423	25.1386	32.5245	36.2946	34.1719	25.7964	34.814	51.1311	31.951
RAB6B	Q9NRW1	RAB6B_HUMAN	Ras-related protein Rab-6B OS=Homo sapiens OX=9606 GN=RAB6B PE=1 SV=1	5.22	23575.8	1227.97	8	46.15	100.377	97.2694	117.053	97.8011	129.473	107.433	101.591	101.874	106.569	85.69	99.2304	81.4199	160.026	100.952	93.6594	91.5399	113.256	117.002	156.95	105.873	104.513	111.991
RAB7A	P51149	RAB7A_HUMAN	Ras-related protein Rab-7a OS=Homo sapiens OX=9606 GN=RAB7A PE=1 SV=1	6.57	23774.9	2009.69	12	69.08	98.1241	110.124	106.419	104.979	128.042	110.179	97.1356	96.4118	102.311	77.6651	62.4126	68.1533	98.023	99.8511	100.149	101.42	73.7839	68.0033	126.181	85.8072	103.139	88.3784
RAB8A	P61006	RAB8A_HUMAN	Ras-related protein Rab-8A OS=Homo sapiens OX=9606 GN=RAB8A PE=1 SV=1	9.55	23839.3	1403.97	4	30.92	26.9674	17.7566	28.5693	20.3812	26.3744	23.0763	25.9924	28.9543	40.8429	26.1657	27.6637	21.2511	27.3533	38.487	27.3831	26.2529	24.7965	21.5867	36.8549	28.0615	26.5081	27.9691
RAB8B	Q92930	RAB8B_HUMAN	Ras-related protein Rab-8B OS=Homo sapiens OX=9606 GN=RAB8B PE=1 SV=2	9.55	23755.2	1490.48	3	19.81	21.7962	21.3554	26.7515	18.2318	24.4234	20.4418	21.744	25.085	28.7775	20.5786	23.6222	24.4355	32.2883	31.6428	37.7256	36.2483	22.7996	25.3716	46.89	44.0795	22.9185	32.5104
RALA	P11233	RALA_HUMAN	Ras-related protein Ral-A OS=Homo sapiens OX=9606 GN=RALA PE=1 SV=1	7	23737.9	2613.84	7	51.94	157.801	150.945	160.756	145.319	178.544	143.39	157.355	151.548	153.484	126.252	189.396	178.976	227.45	234.76	219.806	216.792	203.739	202.329	240.299	214.842	152.539	212.839
RAP1A	P62834	RAP1A_HUMAN	Ras-related protein Rap-1A OS=Homo sapiens OX=9606 GN=RAP1A PE=1 SV=1	6.53	21329.4	5342.94	10	64.13	100.322	104.737	110.733	99.6859	139.1	106.516	113.159	118.361	107.165	95.6078	135.925	129.838	151.632	156.347	162.169	147.185	147.602	156.035	174.349	166.005	109.539	152.709
RAP1B	P61224	RAP1B_HUMAN	Ras-related protein Rap-1b OS=Homo sapiens OX=9606 GN=RAP1B PE=1 SV=1	5.46	21052.9	4421.52	9	60.87	71.4136	76.4492	73.1826	71.8259	102.932	75.2274	81.1651	75.6953	68.0951	63.8455	71.2087	67.7187	82.8045	83.8456	88.5207	81.6713	79.3412	83.2112	87.3894	84.1591	75.9832	80.987
RAP2A	P10114	RAP2A_HUMAN	Ras-related protein Rap-2a OS=Homo sapiens OX=9606 GN=RAP2A PE=1 SV=1	4.53	20843.6	1181.34	5	38.25	35.2272	38.7996	37.0766	34.8071	67.0346	26.0889	22.7874	18.592	23.1502	12.6109	59.0792	52.5047	25.9572	70.9019	39.2136	32.9883	48.7672	54.4217	50.0463	31.9186	31.6174	46.5798
RTN1	Q16799	RTN1_HUMAN	Reticulon-1 OS=Homo sapiens OX=9606 GN=RTN1 PE=1 SV=1	4.41	83902.8	337.93	3	5.03	133.571	125.751	140.278	134.565	198.678	145.028	129.905	135.05	139.057	121.172	182.761	136.136	138.66	142.984	120.033	87.6947	133.508	138.365	100.765		140.305	131.212
RTN4	Q9NQC3	RTN4_HUMAN	Reticulon-4 OS=Homo sapiens OX=9606 GN=RTN4 PE=1 SV=2	4.22	130331	1351.42	31	58.05	1216.22	1151.04	1213.27	1087.26	1342.16	1052.81	1480.42	2253.48	1276.43	1073.72	1440.06	1327.61	1494.14	1459.52	1110.72	1025.92	1146.36	1195.67	958.944	979.121	1314.68	1213.81
ALDH1A1	P00352	AL1A1_HUMAN	Retinal dehydrogenase 1 OS=Homo sapiens OX=9606 GN=ALDH1A1 PE=1 SV=2	6.32	55489.2	927.768	11	38.12	160.598	150.076	173.292	170.027	267.186	208.439	179.881	180.215	128.811	115.283	33.0861	27.7591	107.923	27.593	56.3589	64.246		29.4576	63.9064	31.3922	173.381	49.0803
ARHGDIA	P52565	GDIR1_HUMAN	Rho GDP-dissociation inhibitor 1 OS=Homo sapiens OX=9606 GN=ARHGDIA PE=1 SV=3	4.82	23264.2	4316.52	4	25.49	123.412	127.593	136.285	129.36	174.303	135.156	127.379	125.614	128.641	109.92	44.2172	40.4573	45.6422	33.2415	44.5649	36.2295	36.5789	37.9317	57.5754	50.6758	131.766	42.7114
RHOB	P62745	RHOB_HUMAN	Rho-related GTP-binding protein RhoB OS=Homo sapiens OX=9606 GN=RHOB PE=1 SV=1	4.92	22579.6	8368.62	9	81.63	152.124	149.866	136.283	132.726	186.245	144.461	145.102	147.91	152.35	128.793	208.303	190.844	269.823	257.272	272.562	263.146	220.791	220.004	296.325	246.993	147.586	244.606
RHOC	P08134	RHOC_HUMAN	Rho-related GTP-binding protein RhoC OS=Homo sapiens OX=9606 GN=RHOC PE=1 SV=1	6.21	22348.6	6997.58	8	65.28	19.3005	18.1109	21.4321	20.4546	28.8623	20.898	19.5689	20.0382	16.9036	14.6931											20.0262	0
RHOG	P84095	RHOG_HUMAN	Rho-related GTP-binding protein RhoG OS=Homo sapiens OX=9606 GN=RHOG PE=1 SV=1	8.08	21764.7	7701.99	12	76.44	115.816	108.1	123.581	116.848	136.599	104.448	119.105	117.971	131.265	104.28	156.416	148.935	225.819	251.809	225.695	220.81	184.885	180.232	291.951	261.751	117.801	214.83
RNH1	P13489	RINI_HUMAN	Ribonuclease inhibitor OS=Homo sapiens OX=9606 GN=RNH1 PE=1 SV=2	4.52	51798.4	3161.29	14	54.88	207.529	203.481	276.984	262.822	292.12	211.632	192.279	203.734	221.73	182.033	107.751	102.605	103.618	103.556	64.7983	86.6343	82.6663	82.4602	115.361	94.358	225.434	94.3809
SBDS	Q9Y3A5	SBDS_HUMAN	Ribosome maturation protein SBDS OS=Homo sapiens OX=9606 GN=SBDS PE=1 SV=4	9.15	29048.7	793.781	2	13.2	21.5722	20.7139	47.7955	45.0271	39.9057	53.4151	42.1012	53.0175	21.8743	26.8542	26.9252	18.573	66.988	39.6864	46.6778	44.2767	51.4382	50.7209	22.2679	32.5784	37.2277	40.0133
SCCPDH	Q8NBX0	SCPDL_HUMAN	Saccharopine dehydrogenase-like oxidoreductase OS=Homo sapiens OX=9606 GN=SCCPDH PE=1 SV=1	9.52	47493.6	730.695	5	21.91	77.4452	72.4382	29.8316	37.2163	81.4076	54.7044	82.5863	84.9645	85.9446	71.9824	69.9347	102.618	63.9477	66.8368	82.0783	77.5215	103.615	90.9951	90.8294	81.1299	67.8521	82.9507
SCRN1	Q12765	SCRN1_HUMAN	Secernin-1 OS=Homo sapiens OX=9606 GN=SCRN1 PE=1 SV=2	4.47	47009.4	1479.18	16	58.94	348.52	342.308	431.42	374.434	493.743	346.64	392.379	379.922	332.232	278.713	64.4219	71.4749	66.4162	62.1758	65.5781	65.0676	68.4122	78.6097	77.2448	93.7126	372.031	71.3114
SEPTIN10	Q9P0V9	SEP10_HUMAN	Septin-10 OS=Homo sapiens OX=9606 GN=SEPTIN10 PE=1 SV=2	6.38	53049.3	942.697	14	52.42	116.736	115.534	89.515	90.287	127.125	102.816	99.6295	92.5348	86.7052	86.6875	165.449	157.936	139.735	150.1	158.604	152.989	116.46	123.475	129.141	136.42	100.757	143.031
SEPTIN11	Q9NVA2	SEP11_HUMAN	Septin-11 OS=Homo sapiens OX=9606 GN=SEPTIN11 PE=1 SV=3	6.4	49683.5	1502.53	15	48.48	14527.2	14839.4	11111.1	12775.4	7947.32	10151.5	10564.3	11141.7	9974.56	8049.07	19461.5	22139.7	21951.5	27779.9	20785.1	22723.9	19748.6	19028.4	19178.9	18316.9	11108.2	21111.4
SEPTIN14	Q6ZU15	SEP14_HUMAN	Septin-14 OS=Homo sapiens OX=9606 GN=SEPTIN14 PE=1 SV=2	5.84	50481.2	897.109	4	21.99	154.682	160.784	131.491	126.467	631.898	116.071	211.703	159.072	174.938	615.074	204.164	372.709	245.746	260.96	175.531	223.485	254.866	484.447	224.819	307.102	248.218	275.383
SEPTIN2	Q15019	SEPT2_HUMAN	Septin-2 OS=Homo sapiens OX=9606 GN=SEPTIN2 PE=1 SV=1	6.17	41715.7	10461.7	20	80.33	616.719	619.925	482.03	451.003	630.472	506.754	468.325	466.501	445.831	395.419	883.587	864.439	608.484	651.1	622.92	674.469	610.5	624.468	811.207	540.884	508.298	689.206
SEPTIN4	O43236	SEPT4_HUMAN	Septin-4 OS=Homo sapiens OX=9606 GN=SEPTIN4 PE=1 SV=1	5.72	55554.5	3904.38	14	48.74	349.624	326.656	403.762	392.551	890.707	358.794	375.859	310.88	331.665	963.316	526.122	659.965	778.209	812.321	692.471	723.246	658.644	815.515	591.261	623.248	470.381	688.1
SEPTIN6	Q14141	SEPT6_HUMAN	Septin-6 OS=Homo sapiens OX=9606 GN=SEPTIN6 PE=1 SV=4	6.26	50115.9	879.801	7	24.19	5376.73	5451.39	4113.46	4714.2	2942.46	3750.99	3915.34	4115.84	3687.65	2972.45											4104.05	0
SEPTIN7	Q16181	SEPT7_HUMAN	Septin-7 OS=Homo sapiens OX=9606 GN=SEPTIN7 PE=1 SV=2	8.97	50965.2	8839.23	19	56.98	986.024	970.594	842.178	818.09	950.715	881.546	784.392	850.421	794.347	746.865	1458.84	1333.09	1295.27	1401.11	1288.54	1117.7	1194.32	1167.21	1115.93	1071.81	862.517	1244.38
SEPTIN8	Q92599	SEPT8_HUMAN	Septin-8 OS=Homo sapiens OX=9606 GN=SEPTIN8 PE=1 SV=4	5.87	56269.6	7876.3	22	62.32	928.248	944.774	728.369	691.881	917.301	705.226	720.33	715.548	701.592	649.226	1712	1548.51	1510.55	1488.63	1466.75	1404.34	1229.24	1320.23	1039.94	1139.5	770.25	1385.97
SEPTIN9	Q9UHD8	SEPT9_HUMAN	Septin-9 OS=Homo sapiens OX=9606 GN=SEPTIN9 PE=1 SV=2	9.46	65686.7	1258.07	14	37.2	257.126	260.075	164.782	165.622	226.439	178.742	210.766	210.097	171.813	149.557	432.778	402.688	298.612	309.325	361.361	362.499	342.276	301.506	370.002	369.432	199.502	355.048
PPP2R1A	P30153	2AAA_HUMAN	Serine/threonine-protein phosphatase 2A 65 kDa regulatory subunit A alpha isoform OS=Homo sapiens OX=9606 GN=PPP2R1A PE=1 SV=4	4.82	66107.1	850.664	21	39.9	267.751	339.036	283.437	377.167	233.34	365.895	230.176	423.598	309.25	337.949	293.172	214.925	179.23	221.825	184.168	246.591	241.419	251.47	247.519	332.395	316.76	241.271
PPP2CA	P67775	PP2AA_HUMAN	Serine/threonine-protein phosphatase 2A catalytic subunit alpha isoform OS=Homo sapiens OX=9606 GN=PPP2CA PE=1 SV=1	5.18	36164.5	740.446	9	42.72	123.04	118.117	105.282	102.539	132.727	111.406	118.288	121.879	103.361	90.7146	109.462	112.663	105.728	98.7494	104.327	97.3339	110.993	105.938	104.347	102.691	112.735	105.223
PPP3CA	Q08209	PP2BA_HUMAN	Serine/threonine-protein phosphatase 2B catalytic subunit alpha isoform OS=Homo sapiens OX=9606 GN=PPP3CA PE=1 SV=1	5.5	59372.3	545.158	7	21.88	105.984	108.91	105.944	96.9204	135.727	123.366	104.447	102.472	95.9926	92.084		29.0319		31.9393							107.185	30.4856
PPP1CB	P62140	PP1B_HUMAN	Serine/threonine-protein phosphatase PP1-beta catalytic subunit OS=Homo sapiens OX=9606 GN=PPP1CB PE=1 SV=3	5.79	37985.3	703.559	7	30.89	52.0353	46.3811	51.1703	46.4008	62.7748	49.0569	49.1254	47.7926	49.7873	41.581	65.3348	46.7182	65.6977	55.8447	62.1685	53.0446	54.3558	52.6502	72.4755	58.2348	49.6105	58.6525
SARS	P49591	SYSC_HUMAN	Serine--tRNA ligase_ cytoplasmic OS=Homo sapiens OX=9606 GN=SARS PE=1 SV=3	6.04	59290.6	393.829	3	7.39	109.162	100.834	75.5749	76.8615	110.252	85.226	78.2788	78.5657	82.442	72.0757	33.1299	30.2474									86.9272	31.6886
TF	P02787	TRFE_HUMAN	Serotransferrin OS=Homo sapiens OX=9606 GN=TF PE=1 SV=3	6.78	79345.1	2400.02	28	54.87	414.539	393.625	739.705	666.088	813.651	596.61	666.837	674.934	528.157	462.323	233.862	251.945	202.707	226.925	219.638	197.919	264.132	287.299	303.015	207.16	595.647	239.46
ESD	P10768	ESTD_HUMAN	S-formylglutathione hydrolase OS=Homo sapiens OX=9606 GN=ESD PE=1 SV=2	6.62	31976.1	3221.16	8	56.03	166.374	160.294	244.081	219.922	278.785	228.235	160.306	155.545	116.893	90.3675	41.7286	18.4431	21.4926	23.1122		21.6784		26.2165	31.1237	21.2366	182.08	25.629
SVIP	Q8NHG7	SVIP_HUMAN	Small VCP/p97-interacting protein OS=Homo sapiens OX=9606 GN=SVIP PE=1 SV=1	9.51	8556.74	3179.72	2	32.47	50.9669	49.5351	27.4162	23.7942	45.6783	35.1376	32.1952	40.2319	50.832	42.7829	79.2252	59.4932	60.5917	56.4504	81.1473	67.6333	61.4056	50.5592	104.269	74.1485	39.857	69.4923
ATP1A1	P05023	AT1A1_HUMAN	Sodium/potassium-transporting ATPase subunit alpha-1 OS=Homo sapiens OX=9606 GN=ATP1A1 PE=1 SV=1	5.17	114208	10397.5	44	50.93	2513.07	2357.03	1591.33	1501.66	2244.89	1854.67	1811.42	1829.28	1567.3	1348.56	3140.35	3018.26	2644.24	2913.37	3101.08	2989.52	2697.28	2620.12	2510.86	2218.72	1861.92	2785.38
ATP1A2	P50993	AT1A2_HUMAN	Sodium/potassium-transporting ATPase subunit alpha-2 OS=Homo sapiens OX=9606 GN=ATP1A2 PE=1 SV=1	5.33	113577	6958.62	38	50.98	1130.7	1175.01	917.341	913.747	1223.06	974.964	1007.47	1085.79	904.439	757.072	573.173	515.511	460.456	506.165	406.443	411.896	546.909	526.624	391.081	376.972	1008.96	471.523
ATP1A3	P13637	AT1A3_HUMAN	Sodium/potassium-transporting ATPase subunit alpha-3 OS=Homo sapiens OX=9606 GN=ATP1A3 PE=1 SV=3	5.06	113174	12029.9	45	54.49	2399.71	2278.31	1499.86	1328.82	2377.54	1965.65	2216.14	2206.32	2266.58	1842.62	3305.09	3152.86	2856.89	3234.14	3494.14	3648.59	3326.01	3594.07	3455.93	3261.43	2038.16	3332.91
ATP1A4	Q13733	AT1A4_HUMAN	Sodium/potassium-transporting ATPase subunit alpha-4 OS=Homo sapiens OX=9606 GN=ATP1A4 PE=1 SV=3	6.23	115193	3602.55	15	24.59	398.313	280.258	282.815	251.141	361.609	286.826	324.758	316.305	229.123	214.139	194.913	220.612	180.173	174.513	208.605	241.1	188.744	187.893	187.217	177.551	294.529	196.132
ATP1B1	P05026	AT1B1_HUMAN	Sodium/potassium-transporting ATPase subunit beta-1 OS=Homo sapiens OX=9606 GN=ATP1B1 PE=1 SV=1	8.68	35460.5	20571.2	14	40.59	1271.82	1219.2	743.768	699.005	1142.61	992.624	985.887	1023.88	984.976	824.359	1569.31	1508.99	1485.78	1531.61	1795.17	1755.51	1470.43	1463.19	1633.44	1424.4	988.813	1563.78
ATP1B2	P14415	AT1B2_HUMAN	Sodium/potassium-transporting ATPase subunit beta-2 OS=Homo sapiens OX=9606 GN=ATP1B2 PE=1 SV=3	8.35	33766.3	537.644	2	10	88.577	94.6894	88.5408	74.2283	110.061	79.5507	92.2514	88.7529	69.6527	55.6687				16.7909							84.1973	16.7909
SLC12A2	P55011	S12A2_HUMAN	Solute carrier family 12 member 2 OS=Homo sapiens OX=9606 GN=SLC12A2 PE=1 SV=1	5.98	132132	486.003	5	7.84	214.302	135.675	108.402	104.446	136.91	127.715	102.735	134.877	189.458	143.21	312.628	267.678	397.91	392.854	386.168	363.894	211.082	234.822	479.262	398.534	139.773	344.483
SORD	Q00796	DHSO_HUMAN	Sorbitol dehydrogenase OS=Homo sapiens OX=9606 GN=SORD PE=1 SV=4	7.91	38951.9	1341.99	6	38.1	65.1911	63.0925	64.9527	72.1759	94.7749	59.6751	43.5989	48.9285	31.7084	28.8425	95.2894	90.4008	150.873	173.762	177.251	152.576	61.2194	66.5456	74.7855	76.869	57.294	111.957
SRI	P30626	SORCN_HUMAN	Sorcin OS=Homo sapiens OX=9606 GN=SRI PE=1 SV=1	5.17	21961.6	1688.49	8	57.58	72.644	75.2939	105.966	102.834	135.659	105.146	80.9984	86.5094	57.7535	47.8088	14.9372	17.375	23.5141	25.424	20.6375	19.9483	26.8777	23.0389	18.7784	17.0617	87.0612	20.7593
SPTAN1	Q13813	SPTN1_HUMAN	Spectrin alpha chain_ non-erythrocytic 1 OS=Homo sapiens OX=9606 GN=SPTAN1 PE=1 SV=3	5.06	285338	2571.86	138	69.9	3247.84	3195.46	3958.43	3592.32	4407.53	3841.52	3612	3481.07	3123.69	2656.24	2587.06	3253.25	2891.9	2823.36	2804.96	2813.58	2833.06	2539.99	2780.37	2856.86	3511.61	2818.44
SPTBN1	Q01082	SPTB2_HUMAN	Spectrin beta chain_ non-erythrocytic 1 OS=Homo sapiens OX=9606 GN=SPTBN1 PE=1 SV=2	5.26	275408	2485.12	118	64.89	5314.96	4662.42	10329.9	9272.69	11873.7	9287.8	5155.76	5405.48	3671.99	4418.43	3774.43	5530.83	4765.26	6837.28	5954.56	9755.67	3951.36	7074.76	3495.98	7666.56	6939.32	5880.67
[truncated: 71 more rows]

## Sheet: 4_Lysate Myelin UDMSe (1268)
gene name	accession	entry	description	IEP	mw	max score	reported peptides	sequence coverage	Control_L 1	Control_L 2	Control_L 3	Control_L 4	Control_L 5	Control_L 6	Control_L 7	Control_L 8	Control_L 9	Control_L 10	Control_M 1	Control_M 2	Control_M 3	Control_M 4	Control_M 5	Control_M 6	Control_M 7	Control_M 8	Control_M 9	Control_M 10	AVERAGE Control_L	AVERAGE Control_M
[truncated: 1,268 more rows]
